# Supplementary material for: Iminologous epoxide ring-closure
Source: Royal Society of Chemistry journal article supplement (doi:10.1039/d2sc04496j), 2022-01-01
Supplement: d2sc04496j1.pdf [file d2sc04496j1.pdf]

# Iminologous Epoxide Ring-Closure

By

Chieh-Hung Tien,<sup>a</sup> Alan J. Lough,<sup>b</sup> Andrei K. Yudin<sup>a,\*</sup>

<sup>a</sup> Davenport Research Laboratories, Department of Chemistry, University of Toronto,  
Toronto, ON M5S 3H6

<sup>b</sup> X-Ray Crystallography Laboratory, Department of Chemistry, University of Toronto,  
Toronto, ON M5S 3H6

## Table of Contents

|                                                                                                                                                                                      |     |
|--------------------------------------------------------------------------------------------------------------------------------------------------------------------------------------|-----|
| General considerations .....                                                                                                                                                         | 3   |
| Synthesis of precursors .....                                                                                                                                                        | 4   |
| General procedure for the synthesis of oximes: .....                                                                                                                                 | 5   |
| Synthesis of products .....                                                                                                                                                          | 15  |
| 2D NOESY NMR analysis of <i>trans</i> - and <i>cis</i> - <b>3r</b> .....                                                                                                             | 25  |
| Figure S1. NOESY spectrum of <i>trans</i> - <b>3r</b> for diastereomer assignment. ....                                                                                              | 26  |
| Figure S2. NOESY spectrum of <i>cis</i> - <b>3r</b> for diastereomer assignment. ....                                                                                                | 27  |
| LCMS and TLC traces of <i>trans</i> - and <i>cis</i> - <b>3r</b> .....                                                                                                               | 27  |
| Figure S3. LCMS trace of <i>trans</i> - <b>3r</b> with the MS spectrum of the product (4.03 min) shown. ....                                                                         | 27  |
| Figure S4. LCMS trace of <i>trans</i> - <b>3r</b> with the MS spectrum of the column impurity (4.2 min) shown. ....                                                                  | 28  |
| Figure S5. LCMS trace of <i>cis</i> - <b>3r</b> with the MS spectrum of the product (4.06 min) shown. ....                                                                           | 28  |
| Figure S6. LCMS trace of <i>cis</i> - <b>3r</b> with the MS spectrum of the column impurity (4.2 min) shown. ....                                                                    | 28  |
| Figure S7. LCMS trace of a blank run with the MS spectrum of the column impurity (4.2 min) shown. ....                                                                               | 29  |
| Figure S8. LCMS trace of a mixture of <i>trans</i> - <b>3r</b> and <i>cis</i> - <b>3r</b> with the MS spectrum of the two products (4.03 min) shown. ....                            | 29  |
| Figure S9. LCMS trace of a mixture of <i>trans</i> - <b>3r</b> and <i>cis</i> - <b>3r</b> with the MS spectrum of the column impurity (4.2 min) shown. ....                          | 29  |
| Figure S10. TLC trace of <i>trans</i> - <b>3r</b> (left), <i>cis</i> - <b>3r</b> (right) and a co-spot (middle) eluted with 100% EtOAc visualized under UV light at 254 nm. ....     | 30  |
| Figure S11. TLC trace of <i>trans</i> - <b>3r</b> (left), <i>cis</i> - <b>3r</b> (right) and a co-spot (middle) eluted with 100% EtOAc visualized with KMnO <sub>4</sub> stain. .... | 31  |
| NMR spectra .....                                                                                                                                                                    | 32  |
| Crystallography data for <b>3f</b> , <b>5a</b> , and <b>7b</b> .....                                                                                                                 | 94  |
| References .....                                                                                                                                                                     | 127 |

## **General considerations**

**General:** All solvents and reagents were purchased from commercial sources and used as received unless otherwise stated. Tetrahydrofuran (THF) and toluene were distilled from sodium benzophenone ketyl prior to use. Dichloromethane (DCM) was distilled from calcium hydride prior to use. Reactions were performed under inert atmosphere at room temperature (20 °C) unless otherwise stated. 2,2-Dimethyl-3-((triisopropylsilyl)oxy)cyclohex-3-en-1-one (S1)<sup>1</sup>, 2,2,-disubstituted-1,3-diones<sup>2-8</sup> and formamides<sup>9-10</sup> were synthesized according to literature procedures.

**Chromatography:** Flash column chromatography was carried out using Silicycle 230-400 mesh silica gel eluted with hexanes/ethyl acetate. Thin-layer chromatography was performed on Merck Aluminum-backed TLC Silica gel 60 F<sup>254</sup> and visualized using a UV lamp (254 nm) and KMnO<sub>4</sub> stain. Reverse-phase chromatography was carried out using iLOK SL series C18 20g 50Å on a Biotage® Isolera Prime Flash Purification System eluted with water/acetonitrile (0.1% formic acid) with the absorbance detector set to 214 nm.

**Nuclear Magnetic Resonance spectroscopy:** Rotamers and other conformers of several epoxynitriles were observed in <sup>1</sup>H and <sup>13</sup>C NMR spectroscopy and reported accordingly. <sup>1</sup>H, <sup>13</sup>C, and <sup>19</sup>F NMR spectra were recorded on Bruker 400 MHz and 500 MHz spectrometers at 23 °C unless otherwise stated. Spectral data is reported as follows: chemical shift, multiplicity (s = singlet, d = doublet, t = triplet, q = quartet, dd = doublet of doublets, dt = doublet of triplets, m = multiplet, br = broad), coupling constant (*J*) in Hertz (Hz), and integration. <sup>1</sup>H NMR chemical shifts ( $\delta$ ) are reported in parts per million (ppm) and referenced to residual protonated solvent peak (CDCl<sub>3</sub>:  $\delta$  = 7.26; DMSO-*d*<sub>6</sub>:  $\delta$  = 2.50). <sup>13</sup>C NMR chemical shifts ( $\delta$ ) are reported in ppm and referenced to the corresponding solvent peaks (CDCl<sub>3</sub>:  $\delta$  = 77.2; DMSO-*d*<sub>6</sub>:  $\delta$  = 39.5). <sup>11</sup>B NMR chemical shifts ( $\delta$ ) are reported in ppm and referenced to an external standard of BF<sub>3</sub> · OEt<sub>2</sub> ( $\delta$  = 0.0). <sup>19</sup>F NMR chemical shifts ( $\delta$ ) are reported in ppm and referenced to an external standard of CFCl<sub>3</sub> ( $\delta$  = 0.0).

**Mass spectroscopy:** High resolution mass spectra were obtained on a VG 70-250S (double focusing) mass spectrometer at 70 eV or on an ABI/Sciex Qstar mass spectrometer with ESI or DART sources, MS/MS and accurate mass capabilities. Low-resolution mass spectra (ESI) were collected on an Agilent Technologies 1200 series HPLC paired to a 6130 Mass Spectrometer.

**Infrared spectroscopy and melting point:** FTIR analysis was carried out on a Bruker Alpha Platinum ATP spectrometer. Peaks are reported in wavenumbers ( $\nu$ ) in cm<sup>-1</sup>. Melting point was

measured uncorrected utilizing a Mel-Temp capillary melting point apparatus.

**RP-HPLC/MS:** Low-resolution mass spectra (ESI) were collected on an Agilent Technologies 1200 series HPLC paired to a 6130 Mass Spectrometer. Compounds were resolved on Phenomenex's Kinetex 2.6u C18 50x4.6mm column at room temperature with a flow of 1 mL/min. The gradient consisted of eluents A (0.1% formic acid in Milli-Q water) and B (0.1% formic acid in HPLC-grade MeCN). Method: linear gradient starting from 5% of B to 95% over 4 min at a flow rate of 1.0 mL/min. Stays constant at 95% for 1 min and then returns to 5% over 0.5 min.

### Synthesis of precursors

**tert-Butyl 4,4-dimethyl-3,5-dioxopiperidine-1-carboxylate (S2):** *tert*-Butyl 3,5-dioxopiperidine-1-carboxylate (1.5 g, 7.0 mmol, 1 equiv.) and K<sub>2</sub>CO<sub>3</sub> (2.92 g, 21.1 mmol, 3 equiv.) were added to a 100 mL round bottom flask equipped with a stir bar. MeCN (15 mL) was added, then the mixture was stirred. Iodomethane (1.3 mL, 21.1 mmol, 3 equiv.) was added, then the flask was sealed with a septum and heated in a 40 °C oil bath overnight. The mixture was cooled, then filtered over Celite, then loaded onto Celite. The volatiles were removed *in vacuo*, then the residue was subjected to normal phase column chromatography to afford the product as a colourless solid (0.197 g, 12%). <sup>1</sup>H NMR (400 MHz, CDCl<sub>3</sub>) δ: 4.28 (br, 4H), 1.50 (s, 9H), 1.32 (s, 6H).

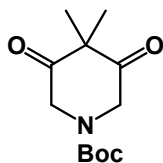

**2,2-Dimethylcycloheptane-1,3-dione (S3):** Tetrabutylammonium hydroxide (8.04 mL, 12.3 mmol, 1.1 equiv., 40 wt% in water) was added to a stirring solution of cycloheptane-1,3-dione (1.4 g, 11.2 mmol, 1 equiv.) dissolved in dioxane (8 mL). Iodomethane (1.58 mL, 24.6 mmol, 2.2 equiv.) was added dropwise to the stirring solution and stirred for 16 h. The mixture was washed with sat. NH<sub>4</sub>Cl and extracted with a mixture of hexanes/ethyl acetate. The organic layers were combined and loaded onto Celite. The volatiles were removed *in vacuo*, then the residue was purified by normal phase column chromatography to afford x as a colourless solid (0.42 g, 2.72 mmol, 24%). <sup>1</sup>H NMR (400 MHz, CDCl<sub>3</sub>) δ: 2.47-2.45 (m, 4H), 1.89-1.86 (m, 4H), 1.23 (s, 3H). <sup>13</sup>C{<sup>1</sup>H} (101 MHz, CDCl<sub>3</sub>) δ: 213.0, 41.1, 28.1, 20.8.

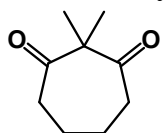

### **General procedure for the synthesis of iminologous diols 1:**

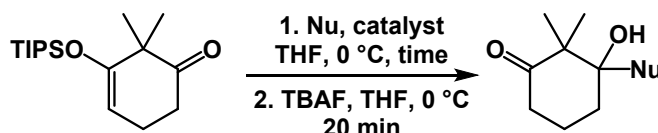

**A:** If the catalysts are weighable solids, then they were added to an oven-dried 50 mL round bottom flask equipped with a magnetic stir bar and purged of air with nitrogen. To an oven-dried 50 mL round bottom flask equipped with a magnetic stir bar was added a solution of **S1**

(1 equiv.) in THF (0.2 M). Then the solution was cooled with an ice water bath. The appropriate nucleophile (DIBAL-H, TMSCH<sub>3</sub>, or MeMgBr) and catalyst (if liquid) were then added and stirred for the indicated time. Upon completion of reaction as indicated by TLC, the mixture was loaded onto Celite, then the volatiles were removed *in vacuo*. The residue was purified by normal phase column chromatography to afford the silyl enol ethers. These were then subjected to TBAF deprotection in THF to afford the β-hydroxy ketones, which were used without further purification.

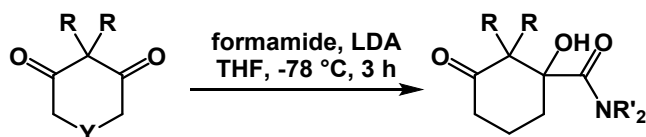

**B:** If the 2,2-disubstituted-1,3-diones and formamides were weighable solids, then they were added to an oven-dried 50 mL round bottom flask equipped with a magnetic stir bar and purged of air with nitrogen. If the 2,2-disubstituted-1,3-diones and formamides were liquids, then they were added to an oven-dried 50 mL round bottom flask equipped with a magnetic stir bar as solutions in THF (1 M), then the final concentration was adjusted to 0.23 M. The solution was cooled with an acetone/dry ice bath for 30 minutes. To a separate oven-dried 50 mL round bottom flask was added diisopropylamine (1 equiv. to 3.5 equiv.) and THF (0.9 M), then the mixture was cooled with an ice water bath for 10 minutes. *n*BuLi (1 equiv. or 3 equiv., 2.5 M in hexane) was added dropwise to the cooled diisopropylamine solution over 5 minutes, then the resulting mixture was stirred for an additional 10 minutes to obtain a solution of lithium diisopropylamide in THF/hexane. The freshly prepared LDA solution was added dropwise by cannula to the dione/formamide solution at -78 °C over 45 minutes. After stirring for an additional 2 h at -78 °C, formic acid (1 equiv. or 3 equiv.) dissolved in MeOH (3 mL) was added dropwise to the reaction mixture, then the mixture was loaded onto Celite. The volatiles were removed *in vacuo*, then the residue was purified by reversed-phase column chromatography to afford the β-hydroxy ketones, which were used without further characterization.

### General procedure for the synthesis of oximes:

To the hydroxy ketone dissolved in MeOH (0.2 M) was added aniline or ammonium acetate (1 equiv.), sodium acetate (3 equiv.) and hydroxylamine hydrochloride (3 equiv.), then the mixture was stirred for 16 h at room temperature or 40 °C. The resulting mixture was diluted with MeOH and loaded onto Celite. The volatiles were removed *in vacuo*, then the residue was purified by reversed-phase column chromatography to afford the oximes.

**(*E*)-3-Hydroxy-2,2-dimethylcyclohexan-1-one oxime (1a):** The ketone was synthesized

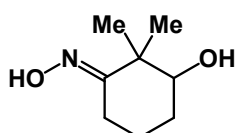

according to general procedure A from **S1** (0.537 g, 1.81 mmol, 1 equiv.) using DIBAL-H (1.45 mL, 2.17 mmol, 1.2 equiv.) as the nucleophile, and stirred for 1.5 h. The oxime was synthesized using aniline as the promoter, and obtained as a colourless solid (0.182 g, 64 % overall yield from **S1**).  $^1\text{H NMR}$  (400 MHz,  $\text{CDCl}_3$ )  $\delta$ : 9.19 (br s, 1H), 3.53-3.50 (m, 1H), 2.78-2.71 (m, 1H), 2.40-2.34 (m, 1H), 1.93-1.80 (m, 2H), 1.72-1.64 (m, 2H), 1.51-1.42 (m, 1H), 1.20 (s, 3H), 1.13 (s, 3H).  $^{13}\text{C}\{^1\text{H}\}$  (101 MHz,  $\text{CDCl}_3$ )  $\delta$ : 164.4, 77.3, 43.2, 29.5, 23.8, 20.9, 20.5, 20.0. Melting point: 127 – 129 °C.

**(E)-3-Hydroxy-2,2,3-trimethylcyclohexan-1-one oxime (1b)**: The ketone was synthesized

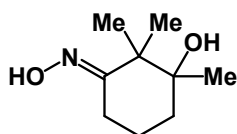

according to general procedure A from **S1** (0.400 g, 1.35 mmol, 1 equiv.) using  $\text{MeMgBr}$  (0.585 mL, 1.75 mmol, 1.3 equiv., 3M in diethyl ether) as the nucleophile and  $\text{ZnCl}_2$  (0.018 g, 0.14 mmol, 10 mol %) as the catalyst, and stirred for 16 h from 0 °C to room temperature. The oxime was

synthesized using aniline as the promoter and obtained as a colourless solid (0.053 g, 23 % overall yield from **S1**).  $^1\text{H NMR}$  (400 MHz,  $\text{CDCl}_3$ )  $\delta$ : 8.94 (br s, 1H), 2.75-2.68 (m, 1H), 2.50-2.43 (m, 1H), 1.80-1.71 (m, 3H), 1.63-1.55 (m, 2H), 1.43 (br s, 1H), 1.19 (s, 3H), 1.18 (s, 3H), 1.15 (s, 3H).  $^{13}\text{C}\{^1\text{H}\}$  (101 MHz,  $\text{CDCl}_3$ )  $\delta$ : 164.9, 75.9, 45.9, 35.7, 24.2, 22.4, 20.6, 20.4, 19.7. Melting point: 72 – 76 °C.

**(E)-N,N-Dibenzyl-1-hydroxy-3-(hydroxyimino)-2,2-dimethylcyclohexane-1-carboxamide (1c)**: The ketone was synthesized according to general procedure B

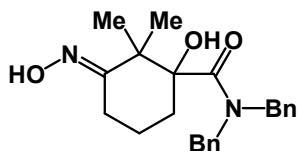

from 2,2-dimethylcyclohexane-1-one<sup>2</sup> (**S4**, 0.680 g, 4.8 mmol, 1 equiv.) with *N,N*-dibenzylformamide<sup>9</sup> (1.20 g, 5.3 mmol, 1.1 equiv.) and freshly prepared LDA solution (16.9 mmol, 3.5 equiv.), and stirred for 3 h at -78 °C. The oxime was synthesized using aniline as

the promoter and heated for two nights and obtained as a colourless solid (0.437 g, 24 % overall yield from **S3**).  $^1\text{H NMR}$  (400 MHz,  $\text{DMSO}-d_6$ )  $\delta$ : 10.09 (s, 1H), 7.38-7.16 (m, 10H), 5.36 (s, 1H), 5.28 (d,  $J = 15.2$  Hz, 1H), 4.80 (d,  $J = 15.6$  Hz, 1H), 4.49 (d,  $J = 14.8$  Hz, 1H), 4.14 (d,  $J = 14.8$  Hz, 1H), 2.61-2.54 (m, 1H), 2.37-2.30 (m, 1H), 2.25-2.20 (m, 1H), 1.92-1.85 (m, 1H), 1.71-1.65 (m, 1H), 1.60-1.53 (m, 1H), 1.21 (s, 1H), 1.09 (s, 3H).  $^{13}\text{C}\{^1\text{H}\}$  (101 MHz,  $\text{DMSO}-d_6$ )  $\delta$ : 173.1, 162.0, 138.2, 137.9, 128.3, 127.5, 127.3, 126.9, 82.0, 50.8, 48.6, 45.6, 32.1, 23.4, 22.5, 19.1, 18.7. Melting point: 198 – 202 °C (decomp.).

**(E)-1-Hydroxy-3-(hydroxyimino)-N,N,2,2-tetramethylcyclohexane-1-carboxamide (1d)**:

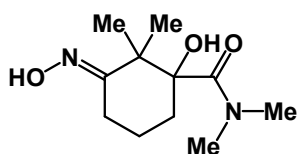

The ketone was synthesized according to general procedure B from **S4**<sup>2</sup> (0.210 g, 1.5 mmol, 1 equiv.) with *N,N*-dimethylformamide (0.115 mL, 1.5 mmol, 1 equiv.) and freshly prepared LDA solution (4.5 mmol, 3 equiv.), and stirred for 3 h at -78 °C. The oxime was

synthesized using aniline as the promoter and obtained as a colourless solid (0.084 g, 25 % overall yield from **S3**).  $^1\text{H NMR}$  (500 MHz,  $\text{DMSO-}d_6$ )  $\delta$ : 10.10 (s, 1H), 5.20 (s, 1H), 3.32 (s, 3H), 2.80 (br s, 3H), 2.61-2.56 (m, 1H), 2.25-2.16 (m, 2H), 1.64-1.60 (m, 1H), 1.56-1.52 (m, 1H), 1.47-1.42 (m, 1H), 1.07-1.06 (overlapping s, 6H).  $^{13}\text{C}\{^1\text{H}\}$  (126 MHz,  $\text{DMSO-}d_6$ )  $\delta$ : 172.7, 161.9, 81.8, 45.1, 31.7, 23.5, 22.7, 19.1, 18.8. FTIR (neat):  $\nu$  = 3393, 3177, 2989, 2938, 2882, 2827, 1576, 1502, 1446, 1421, 1395, 1364, 1335, 1248, 1194, 1172, 1143, 1108, 918, 911, 802, 730, 670, 628. Melting point: 220 – 223 °C (decomp.).

**(E)-(1-Hydroxy-3-(hydroxyimino)-2,2-dimethylcyclohexyl)(4-phenylpiperazin-1-yl)methanone (1e):**

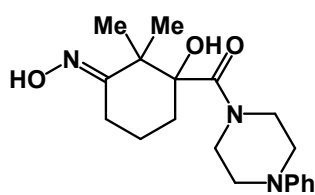

The ketone was synthesized according to general procedure B from **S4**<sup>2</sup> (0.210 g, 1.5 mmol, 1 equiv.) with 4-phenylpiperazine-1-carbaldehyde<sup>9</sup> (0.285 g, 1.5 mmol, 1 equiv.) and freshly prepared LDA solution (4.5 mmol, 3 equiv.), and stirred for 3 h at -78 °C. The oxime was synthesized using aniline as the promoter and heated for two nights and obtained as a colourless solid (0.086 g, 17 % overall yield from **S3**).

$^1\text{H NMR}$  (500 MHz,  $\text{DMSO-}d_6$ )  $\delta$ : 10.14 (s, 1H), 7.23-7.20 (m, 2H), 6.95-6.94 (m, 2H), 6.80-6.77 (m, 1H), 5.35 (s, 3H), 4.38-3.58 (br, 4H), 3.13 (br, 4H), 2.62-2.56 (m, 1H), 2.28-2.21 (m, 1H), 1.72-1.68 (m, 1H), 1.59-1.54 (m, 1H), 1.49-1.44 (m, 1H), 1.10 (s, 6H).  $^{13}\text{C}\{^1\text{H}\}$  (126 MHz,  $\text{DMSO-}d_6$ )  $\delta$ : 171.6, 161.8, 150.9, 128.9, 119.1, 115.6, 83.0, 82.1, 52.9, 48.7, 44.9, 31.9, 23.4, 22.8, 19.0, 18.7. Melting point: 214 – 218 °C (decomp.).

**(E)-(1-Hydroxy-3-(hydroxyimino)-2,2-dimethylcyclohexyl)(pyrrolidin-1-yl)methanone (1f):**

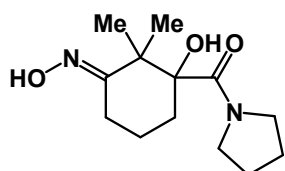

The ketone was synthesized according to general procedure B from **S4**<sup>2</sup> (0.210 g, 1.5 mmol, 1 equiv.) with *N*-formylpyrrolidine<sup>9</sup> (0.150 g, 1.5 mmol, 1 equiv.) and freshly prepared LDA solution (4.5 mmol, 3 equiv.), and stirred for 3 h at -78 °C. The oxime was synthesized using aniline as the promoter and obtained as a colourless solid (0.116 g, 30 % overall yield from **S3**).

$^1\text{H NMR}$  (500 MHz,  $\text{DMSO-}d_6$ )  $\delta$ : 10.11 (s, 1H), 4.96 (s, 1H), 3.88-3.83 (m, 1H), 3.69-3.64 (m, 1H), 3.30-3.29 (m, 2H), 2.64-2.60 (m, 1H), 2.23-2.18 (m, 2H), 1.82-1.51 (m, 7H), 1.08 (s, 3H), 1.04 (s, 3H).  $^{13}\text{C}\{^1\text{H}\}$  (126 MHz,  $\text{DMSO-}d_6$ )  $\delta$ : 171.7, 161.8, 80.8, 47.9, 47.7, 44.9, 31.4, 26.9, 23.6, 22.5, 22.2, 19.0, 18.8. Melting point: 239 – 242 °C (decomp.).

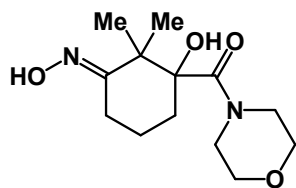

**(E)-(1-Hydroxy-3-(hydroxyimino)-2,2-dimethylcyclohexyl)-**

**(morpholino)methanone (1g):** The ketone was synthesized according to general procedure B from **S4**<sup>2</sup> (0.210 g, 1.5 mmol, 1 equiv.) with *N*-formylmorpholine<sup>9</sup> (0.173 g, 1.5 mmol, 1 equiv.) and freshly prepared LDA solution (4.5 mmol, 3 equiv.), and stirred for 3

h at -78 °C. The oxime was synthesized using aniline as the promoter and obtained as a

colourless solid (0.204 g, 50 % overall yield from **S3**).  $^1\text{H NMR}$  (500 MHz,  $\text{DMSO-}d_6$ )  $\delta$ : 10.14 (s, 1H), 5.31 (s, 1H), 4.27-3.41 (overlapping br m, 8H), 2.62-2.59 (m, 1H), 2.25-2.17 (m, 2H), 1.69-1.64 (m, 1H), 1.59-1.53 (m, 1H), 1.50-1.44 (m, 1H), 1.08-1.07 (overlapping s, 6H).  $^{13}\text{C}\{^1\text{H}\}$  (126 MHz,  $\text{DMSO-}d_6$ )  $\delta$ : 171.6, 161.7, 82.2, 66.5, 44.9, 31.9, 23.5, 22.7, 19.0, 18.7. Melting point: 211 – 218 °C (decomp.).

**(E)-1-Hydroxy-3-(hydroxyimino)-N,2,2-trimethyl-N-phenylcyclohexane-1-carboxamide**

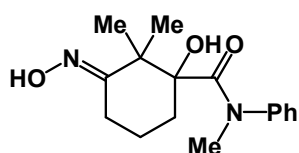

**(1h):** The ketone was synthesized according to general procedure B from **S4**<sup>2</sup> (0.210 g, 1.5 mmol, 1 equiv.) with *N*-methyl-*N*-phenylformamide<sup>9</sup> (0.203 g, 1.5 mmol, 1 equiv.) and freshly prepared LDA solution (4.5 mmol, 3 equiv.), and stirred for 3 h at -78 °C. The

oxime was synthesized using aniline as the promoter and obtained as a colourless solid (0.121 g, 28 % overall yield from **S3**).  $^1\text{H NMR}$  (500 MHz,  $\text{DMSO-}d_6$ )  $\delta$ : 10.02 (s, 1H), 7.36-7.32 (m, 2H), 7.23-7.20 (m, 1H), 7.16-7.12 (m, 2H), 4.64 (br, 1H), 3.27 (br 3H), 2.53 (m, 1H), 2.30-2.25 (m, 1H), 2.09-2.01 (m, 1H), 1.74-1.69 (m, 1H), 1.59-1.56 (m, 2H), 1.11 (s, 3H), 1.03 (s, 3H).  $^{13}\text{C}\{^1\text{H}\}$  (126 MHz,  $\text{DMSO-}d_6$ )  $\delta$ : 173.0, 162.0, 146.9, 128.7, 126.9, 125.9, 82.9, 81.4, 45.3, 40.7, 32.2, 23.2, 19.1, 18.6. Melting point: 255 – 260 °C (decomp.).

**(E)-N-(3-(10,11-Dihydro-5H-dibenzo[b,f]azepin-5-yl)propyl)-1-hydroxy-3-(hydroxy-**

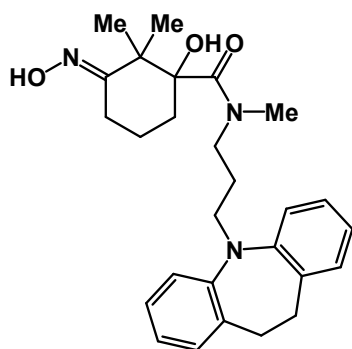

**imino)-N,2,2-trimethylcyclohexane-1-carboxamide (1i):** The ketone was synthesized according to general procedure B from **S4**<sup>2</sup> (0.143 g, 1.02 mmol, 1 equiv.) with *N*-(3-(10,11-dihydro-5H-dibenzo[*b,f*]azepin-5-yl)propyl)-*N*-methyl-formamide<sup>10</sup> (0.300 g, 1.02 mmol, 1 equiv.) and freshly prepared LDA solution (3.06 mmol, 3 equiv.), and stirred for 3 h at -78 °C. The oxime was synthesized using aniline as the promoter and obtained as a colourless solid (0.093 g, 20 % overall yield from **S3**).  $^1\text{H NMR}$

(500 MHz,  $\text{DMSO-}d_6$ )  $\delta$ : 10.07 (s, 1H), 7.12-7.09 (m, 6H), 6.92-6.89 (m, 2H), 5.14 (br, 1H), 3.68-3.65 (m, 2H), 3.17-3.09 (br, 8H), 2.56 (m, 1H), 2.19-2.07 (br, 3H), 1.67-1.39 (m, 5H), 1.04-1.02 (overlapping s, 6H).  $^{13}\text{C}\{^1\text{H}\}$  (126 MHz,  $\text{DMSO-}d_6$ )  $\delta$ : 162.0, 148.1, 133.7, 129.7, 126.3, 122.4, 119.8, 81.7, 47.7, 47.5, 45.1, 36.9, 31.6, 31.5, 25.4, 23.3, 22.8, 19.0, 18.8. Melting point: 195 – 202 °C (decomp.).

**(E)-3-Hydroxy-2,2-dimethyl-3-(trifluoromethyl)cyclohexan-1-one oxime (1j):** The ketone

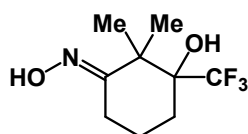

was synthesized according to general procedure A from **S1** (0.400 g, 1.35 mmol, 1 equiv.) using  $\text{TMSCF}_3$  (0.300 mL, 2.02 mmol, 1.5 equiv.) as the nucleophile and TBAF (0.067 mL, 0.07 mmol, 5 mol %) as the catalyst, and stirred for 3 h at 0 °C. The oxime was synthesized using aniline as the promoter and



obtained as a colourless solid (0.150 g, 49 % overall yield from **S1**).  $^1\text{H}$  NMR (500 MHz,  $\text{DMSO-}d_6$ )  $\delta$ : 10.46 (s, 1H), 5.75 (s, 1H), 2.53-2.42 (m, 2H, overlap with solvent peak), 2.01-1.95 (m, 1H), 1.85-1.81 (m, 1H), 1.67-1.60 (m, 1H), 1.51-1.44 (m, 1H), 1.17-1.16 (overlapping s, 6H).  $^{13}\text{C}\{^1\text{H}\}$  (126 MHz,  $\text{DMSO-}d_6$ )  $\delta$ : 160.6, 127.1 (q,  $J = 291$  Hz), 76.9 (q,  $J = 25$  Hz), 43.7, 28.0 (d,  $J = 1.3$  Hz), 22.2 (d,  $J = 2.5$  Hz), 22.1 (d,  $J = 1.3$  Hz), 18.6, 18.6.  $^{19}\text{F}$  NMR (376 MHz,  $\text{CDCl}_3$ )  $\delta$ : -72.98. Melting point: 175 – 181 °C.

**(E)-(4-Hydroxy-8-(hydroxyimino)spiro[2.5]octan-4-yl)(pyrrolidin-1-yl)methanone (1k):**

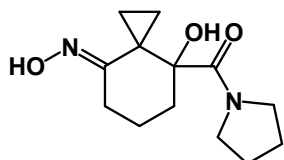

The ketone was synthesized according to general procedure B from spiro[2.5]octane-4,8-dione<sup>3</sup> (0.207 g, 1.5 mmol, 1 equiv.) with *N*-formylpyrrolidine<sup>9</sup> (0.150 g, 1.5 mmol, 1 equiv.) and freshly prepared LDA solution (4.5 mmol, 3 equiv.), and stirred for 3 h at -78 °C. The oxime was synthesized using aniline as the promoter and obtained as a colourless solid (0.134 g, 35 % overall yield from dione).  $^1\text{H}$  NMR (400 MHz,  $\text{DMSO-}d_6$ )  $\delta$ : 9.95 (br, 1H), 5.12 (br 1H), 3.81 (br, 1H), 3.57 (br, 1H), 3.27 (br, 2H), 2.45-2.41 (m, 1H), 2.29-2.11 (m, 2H), 1.85-1.51 (m, 7H), 0.87-0.85 (m, 1H), 0.67-0.66 (m, 2H), 0.53-0.51 (m, 1H).  $^{13}\text{C}\{^1\text{H}\}$  (101 MHz,  $\text{DMSO-}d_6$ )  $\delta$ : 171.2, 158.6, 77.2, 47.5, 47.3, 34.6, 28.7, 26.6, 22.6, 22.5, 19.2, 10.4, 7.1. Melting point: 198 – 203 °C (decomp.).

**(E)-(6-Hydroxy-10-(hydroxyimino)spiro[4.5]decan-6-yl)(pyrrolidin-1-yl)methanone (1l):**

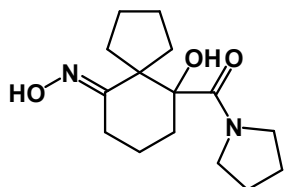

The ketone was synthesized according to general procedure B from spiro[4.5]decane-6,10-dione<sup>4</sup> (0.250 g, 1.5 mmol, 1 equiv.) with *N*-formylpyrrolidine<sup>9</sup> (0.150 g, 1.5 mmol, 1 equiv.) and freshly prepared LDA solution (4.5 mmol, 3 equiv.), and stirred for 3 h at -78 °C. The oxime was synthesized using aniline as the promoter and obtained as a colourless solid (0.081 g, 19 % overall yield from dione).  $^1\text{H}$  NMR (400 MHz,  $\text{DMSO-}d_6$ )  $\delta$ : 9.97 (s, 1H), 5.08 (br, 1H), 3.85-3.80 (m, 1H), 3.67-3.60 (m, 1H), 3.28-3.25 (m, 2H), 2.58-2.53 (m, 1H), 2.19-2.12 (m, 1H), 2.05-2.00 (m, 2H), 1.80-1.77 (m, 2H), 1.71-1.54 (m, 7H), 1.46-1.38 (m, 5H).  $^{13}\text{C}\{^1\text{H}\}$  (101 MHz,  $\text{DMSO-}d_6$ )  $\delta$ : 171.9, 160.8, 80.6, 57.2, 47.7, 47.5, 32.7, 32.1, 31.0, 26.8, 25.0, 25.0, 22.6, 19.4, 19.1. Melting point: 237 – 238 °C (decomp.).

**(E)-(6-Hydroxy-10-(hydroxyimino)spiro[4.5]dec-2-en-6-yl)(pyrrolidin-1-yl)methanone**

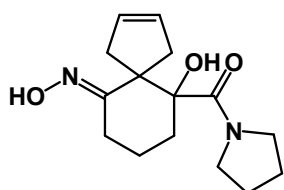

**(1m):** The ketone was synthesized according to general procedure B from spiro[4.5]dec-2-ene-6,10-dione<sup>4</sup> (0.222 g, 1.35 mmol, 1 equiv.) with *N*-formylpyrrolidine<sup>9</sup> (0.133 g, 1.35 mmol, 1 equiv.) and freshly prepared LDA solution (4.05 mmol, 3 equiv.), and stirred for 3 h at -78 °C. The oxime was synthesized using aniline as the promoter and obtained as a colourless solid (0.124 g, 33 % overall yield from dione).  $^1\text{H}$  NMR (400 MHz,

DMSO- $d_6$ )  $\delta$ : 9.95 (s, 1H), 5.51 (d,  $J$  = 5.6 Hz, 1H), 5.39 (d,  $J$  = 5.6 Hz, 1H), 5.1 (s, 1H), 3.87-3.81 (m, 1H), 3.66-3.61 (m, 1H), 3.27-3.24 (m, 2H), 2.90-2.86 (m, 1H), 2.74-2.70 (m, 1H), 2.63-2.59 (m, 1H), 2.42-2.37 (m, 1H), 2.24-2.20 (m, 1H), 2.09-1.93 (m, 2H), 1.79-1.56 (m, 6H), 1.37-1.29 (m, 1H).  $^{13}\text{C}\{^1\text{H}\}$  (101 MHz, DMSO- $d_6$ )  $\delta$ : 171.6, 160.1, 129.8, 126.8, 80.1, 56.1, 47.4, 39.7, 38.3, 31.7, 26.7, 22.6, 19.2, 18.9. Melting point: 247 – 250 °C (decomp.).

**(E)-(1-Hydroxy-3-(hydroxyimino)-2,2-dimethylcyclopentyl)(pyrrolidin-1-yl)methanone**

**(1n):** The ketone was synthesized according to general procedure B from 2,2-dimethylcyclopentane-1,3-dione<sup>5</sup> (0.189 g, 1.5 mmol, 1 equiv.) with *N*-formylpyrrolidine<sup>9</sup> (0.150 g, 1.5 mmol, 1 equiv.) and freshly prepared LDA solution (4.5 mmol, 3 equiv.), and stirred for 3 h at -78 °C. The oxime was synthesized using aniline as the promoter and obtained as a colourless solid (0.099 g, 27 % overall yield from dione).  $^1\text{H}$  NMR (500 MHz, DMSO- $d_6$ )  $\delta$ : 10.12 (s, 1H), 5.30 (br, 1H), 3.86-3.82 (m, 1H), 3.69-3.64 (m, 1H), 3.37-3.27 (m, 2H), 2.48-2.40 (m, 2H), 2.35-2.30 (m, 1H), 1.85-1.83 (m, 1H), 1.76-1.60 (m, 4H), 1.09 (s, 3H), 0.91 (s, 3H).  $^{13}\text{C}\{^1\text{H}\}$  (126 MHz, DMSO- $d_6$ )  $\delta$ : 170.9, 167.6, 85.8, 49.0, 47.9, 47.4, 33.2, 26.8, 24.0, 23.4, 22.5, 21.5. Melting point: 207 – 211 °C (decomp.).

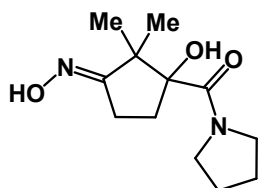

**(E)-(1-Hydroxy-3-(hydroxyimino)-2,2-dimethylcycloheptyl)(pyrrolidin-1-yl)methanone**

**(1o):** The ketone was synthesized according to general procedure B from **S2** (0.417 g, 2.7 mmol, 1 equiv.) with *N*-formylpyrrolidine<sup>9</sup> (0.268 g, 2.7 mmol, equiv.) and freshly prepared LDA solution (0.3 mmol, 1.1 equiv.), and stirred for 3 h at -78 °C. The oxime was synthesized using ammonium acetate as the promoter with 4 equivalents of  $\text{NH}_2\text{OH} \cdot \text{HCl}$  and sodium acetate at 60 °C for 5 days and obtained as a colourless solid (0.097 g, 13 % overall yield from dione).  $^1\text{H}$  NMR (500 MHz, DMSO- $d_6$ )  $\delta$ : 10.27 (s, 1H), 4.79 (s, 1H), 3.86-3.82 (m, 1H), 3.71-3.66 (m, 1H), 3.31-3.29 (m, 2H, overlap with water), 2.55-2.244 (m, 2H, overlap with solvent peak), 2.13-2.08 (m, 1H), 1.87-1.45 (m, 9H), 1.18 (s, 3H), 1.10 (s, 3H).  $^{13}\text{C}\{^1\text{H}\}$  (126 MHz, DMSO- $d_6$ )  $\delta$ : 173.4, 163.1, 80.8, 48.2, 47.9, 47.9, 36.2, 26.9, 25.1, 24.1, 23.7, 23.6, 22.5, 22.3. Melting point: 187 – 193 °C.

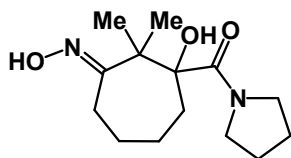

**(E)-(1-Hydroxy-3-(hydroxyimino)-2,2,5,5-tetramethylcyclohexyl)(pyrrolidin-1-**

**yl)methanone (1p):** The ketone was synthesized according to general procedure B from 2,2,5,5-tetramethylcyclohexane-1,3-dione<sup>6</sup> (0.147 g, 0.87 mmol, 1 equiv.) with *N*-formylpyrrolidine<sup>9</sup> (0.087 g, 0.87 mmol, 1 equiv.) and freshly prepared LDA solution (2.62 mmol, 3 equiv.), and stirred for 3 h at -78 °C. The oxime was synthesized using aniline

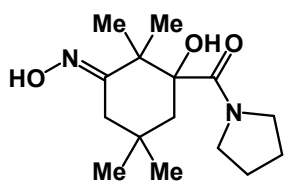

as the promoter and stirred for 2 nights and obtained as a colourless solid (0.081 g, 33 % overall yield from dione).  $^1\text{H NMR}$  (400 MHz,  $\text{DMSO-}d_6$ )  $\delta$ : 10.23 (s, 1H), 4.78 (s, 1H), 3.91-3.88 (m, 1H), 3.66-3.62 (m, 1H), 3.34-3.31 (overlap with water, 2H), 2.90 (d,  $J = 14$  Hz, 1H), 2.44 (d,  $J = 14$  Hz, 1H), 1.87-1.83 (m, 1H), 1.77-1.69 (m, 3H), 1.61-1.59 (m, 1H), 1.40 (d,  $J = 15.2$  Hz, 1H), 1.07 (s, 3H), 1.03 (s, 3H), 0.96 (s, 6H).  $^{13}\text{C}\{^1\text{H}\}$  (101 MHz,  $\text{DMSO-}d_6$ )  $\delta$ : 171.6, 160.4, 82.5, 48.2, 48.1, 44.1, 44.1, 33.3, 32.4, 31.9, 28.9, 27.0, 25.6, 22.4, 21.2. Melting point: 254 – 256 °C (decomp.).

**tert-Butyl (Z)-3-hydroxy-5-(hydroxyimino)-4,4-dimethyl-3-(pyrrolidine-1-carbonyl)-piperidine-1-carboxylate (1q):** The ketone was synthesized

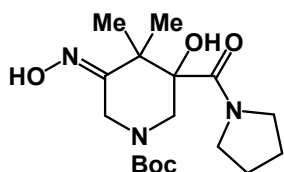

according to general procedure B from **S2** (0.185 g, 0.77 mmol, 1 equiv.) with *N*-formylpyrrolidine<sup>9</sup> (0.076 g, 0.77 mmol, equiv.) and freshly prepared LDA solution (2.3 mmol, 3 equiv.), and stirred for 3

h at -78 °C. The oxime was synthesized using aniline as the promoter and obtained as a colourless solid (0.027 g, 10 % overall yield from dione).  $^1\text{H NMR}$  (500 MHz,  $\text{DMSO-}d_6$ )  $\delta$ : 10.48 (br, 1H), 5.58 (br, 1H), 4.51-4.35 (m, 1H), 4.09-3.81 (m, 3H), 3.72-3.65 (m, 1H), 3.35-3.29 (m, 3H), 1.83-1.65 (m, 4H), 1.39-1.38 (m, 9H), 1.12-1.10 (overlapping s, 6H).  $^{13}\text{C}\{^1\text{H}\}$  (126 MHz,  $\text{DMSO-}d_6$ , mixture of rotamers)  $\delta$ : 169.9, 169.9, 158.2, 154.2, 154.0, 78.9, 78.8, 78.0, 78.0, 47.9, 47.7, 47.2, 43.6, 38.8, 38.0, 28.1, 26.8, 26.7, 22.5, 22.5, 22.4, 22.0. Melting point: 212 – 219 °C (decomp.).

**Diethyl (E)-2-hydroxy-2-(2-(hydroxyimino)cyclohexyl)malonate (4a):** Cyclohexanone

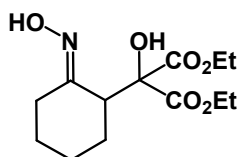

(0.104 mL, 1 mmol, equiv.) was added to an oven-dried 50 mL round bottom flask, equipped with a magnetic stir bar dissolved in THF (5 mL) and stirred in an acetone/dry ice bath for 30 minutes. A freshly prepared solution of LDA (1.05 mmol, 1.05 equiv.) was added dropwise to the

solution over 5 minutes at -78 °C. Diethyl mesoxalate (0.153 mL, 1 mmol, 1 equiv.) was added dropwise at -78 °C and the mixture was stirred for 16 h while warming up to room temperature. The reaction was quenched with saturated  $\text{NH}_4\text{Cl}$  and extracted with a mixture of hexanes/ethyl acetate. The organic layers were combined and loaded onto Celite. The volatiles were removed *in vacuo* then the residue was subjected to normal phase column chromatography to afford the hydroxy ketone which was used without further characterization. The oxime was synthesized using aniline as the promoter with 1 equivalent of  $\text{NH}_2\text{OH} \cdot \text{HCl}$  and sodium acetate and obtained as a colourless solid (0.148 g, 52 % overall yield from cyclohexanone).  $^1\text{H NMR}$  (500 MHz,  $\text{DMSO-}d_6$ )  $\delta$ : 10.46 (s, 1H), 5.25 (s, 1H), 4.15 (q,  $J = 7$  Hz, 2H), 4.08 (q,  $J = 7.5$  Hz, 2H), 3.13 (dd,  $J = 10.5, 4.5$  Hz, 1H), 3.02-2.97 (m, 1H), 1.86-1.76 (m, 2H), 1.68-1.54 (m, 3H), 1.48-1.43 (m, 1H), 1.32-1.28 (m, 1H), 1.18 (t,  $J = 7.5$  Hz, 3H), 1.14 (t,  $J = 7$  Hz, 3H).  $^{13}\text{C}\{^1\text{H}\}$  (101 MHz,  $\text{DMSO-}d_6$ )  $\delta$ : 169.5, 169.3, 156.0, 80.8, 61.5, 61.1, 46.2, 27.6, 25.1, 24.4, 23.7,

13.9, 13.9. FTIR (neat):  $\nu = 3540, 3362, 2990, 2944, 2916, 2861, 1745, 1730, 1663, 1474, 1441, 1398, 1276, 1227, 1149, 1115, 1061, 1018, 968, 929, 898, 862, 789, 699, 666, 635, 599$ . Melting point: 79 – 81 °C.

**Diethyl (*E*)-2-hydroxy-2-(2-(hydroxyimino)-1-methylcyclohexyl)malonate (4b):** To an oven-dried 50 mL round bottom flask equipped with a magnetic stir bar was added trimethyl((2-methylcyclohex-1-en-1-yl)oxy)silane<sup>11</sup> (1.00 g, 5.42 mmol, 1.1 equiv.) and diethyl mesoxalate (0.750 mL, 4.88 mmol, 1 equiv.) and DCM (20 mL). The mixture was cooled with an ice/water bath and stirred for 10 minutes.  $\text{BF}_3 \cdot \text{OEt}_2$  (0.670 mL, 5.42 mmol, 1.1 equiv.) was added dropwise, then the mixture was stirred overnight while warming up to room temperature. The mixture was loaded onto Celite, then the volatiles were removed *in vacuo*. The residue was subjected to normal phase column chromatography to afford the hydroxy ketone which was used without further characterization. The oxime was synthesized using ammonium acetate as the promoter with 2 equivalents of  $\text{NH}_2\text{OH} \cdot \text{HCl}$  and sodium acetate in ethanol at room temperature, and obtained as a colourless solid (0.047 g, 5 % overall yield from diethylmesoxalate). <sup>1</sup>H NMR (400 MHz, DMSO-*d*<sub>6</sub>)  $\delta$ : 10.50 (s, 1H), 5.44 (s, 1H), 4.16-4.05 (m, 4H), 2.96-2.91 (m, 1H), 2.27-2.19 (m, 1H), 2.00-1.92 (m, 1H), 1.69-1.62 (m, 2H), 1.53-1.45 (m, 1H), 1.38-1.29 (m, 5H), 1.20-1.14 (m, 6H). <sup>13</sup>C{<sup>1</sup>H} (101 MHz, DMSO-*d*<sub>6</sub>)  $\delta$ : 169.8, 168.4, 161.1, 83.9, 60.9, 60.6, 45.6, 33.7, 23.0, 21.6, 21.1, 20.9, 13.8, 13.8. Melting point: 113 – 116 °C (decomp.).

***rac*-((1*S*,2*R*,*E*)-1-hydroxy-3-(hydroxyimino)-2-(4-methoxybenzyl)-2-methylcyclohexyl)-(pyrrolidin-1-yl)methanone (*cis*-1r):** The ketone was synthesized according to general procedure B from 2-(4-methoxybenzyl)-2-methylcyclohexane-1,3-dione<sup>7</sup> (0.493 g, 2 mmol, 1 equiv.) with *N*-formylpyrrolidine<sup>9</sup> (0.200 g, 2 mmol, 1 equiv.) and freshly prepared LDA solution (6 mmol, 3 equiv.), and stirred for 3 h at -78 °C to afford the *cis*-isomer as the major product. The oxime was synthesized using ammonium acetate as the promoter with 4 equivalents of  $\text{NH}_2\text{OH} \cdot \text{HCl}$  and sodium acetate at 60 °C for 5 days and obtained as a colourless solid (0.136 g, 19 % overall yield from dione, dr > 20:1). Crystals suitable for X-ray crystallography analysis were grown in a mixture of MeCN/DMSO using the slow evaporation method at room temperature. <sup>1</sup>H NMR (500 MHz, DMSO-*d*<sub>6</sub>)  $\delta$ : 9.90 (s, 1H), 6.84 (d, *J* = 8.2 Hz, 2H), 6.73 (d, *J* = 8.2 Hz, 2H), 5.32 (br, 1H), 3.83-3.73 (m overlap with s, 5H), 3.40-3.37 (m, 2H), 3.13-3.09 (m, 1H), 2.94 (d, *J* = 14.1 Hz, 1H), 2.70 (d, *J* = 14.1 Hz, 1H), 2.02-1.95 (m, 2H), 1.81-1.61 (m, 7H), 0.85 (s, 3H). <sup>13</sup>C{<sup>1</sup>H} (126 MHz, DMSO-*d*<sub>6</sub>)  $\delta$ : 171.9, 158.8, 157.4, 131.7, 130.2, 112.7, 80.6, 54.8, 49.0, 47.8, 47.6, 37.6, 31.1, 26.8, 19.8, 19.3, 19.3, 16.5. Melting point: 205 – 206 °C.

***rac*-((1*S*,2*S*,*E*)-1-hydroxy-3-(hydroxyimino)-2-(4-methoxybenzyl)-2-methylcyclohexyl)-**

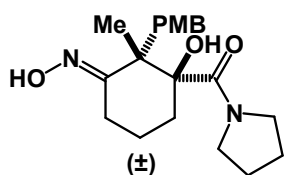

**(pyrrolidin-1-yl)methanone (*trans*-1r):** The ketone was synthesized

in the same reaction as above and isolated as the minor isomer. The oxime was synthesized using ammonium acetate promoter with 4 equivalents of  $\text{NH}_2\text{OH} \cdot \text{HCl}$  and sodium acetate at 60 °C for 5 days and obtained as a colourless solid (0.020 g, 3 % overall yield from dione, 4:1 rotamer, dr > 20:1).  $^1\text{H}$  NMR (500 MHz,  $\text{DMSO}-d_6$ )  $\delta$ : 10.36 (s, minor), 10.23 (s, 1H), 6.92 (d,  $J = 9$  Hz, minor), 6.81 (d,  $J = 9$  Hz, 2H), 6.75 (d,  $J = 8.5$  Hz, minor), 6.71 (d,  $J = 8.5$  Hz, 2H), 4.98 (s, 1H), 4.81 (d,  $J = 4.5$  Hz, minor), 3.96-3.92 (m, 1H), 3.72-3.68 (overlap with minor, 4H), 3.44-3.37 (overlap with minor, 2H), 3.29-3.27 (m, minor), 3.19-3.16 (m, 1H), 3.15-3.12 (d,  $J = 14$  Hz, 1H), 2.95-2.85 (m, minor), 2.87 (d,  $J = 13.5$  Hz, minor), 2.72 (d,  $J = 13.5$  Hz, minor), 2.66 (d,  $J = 14$  Hz, 1H), 2.63-2.58 (m, 1H), 2.22-2.16 (m, minor), 2.11-2.04 (m, 1H), 1.79-1.55 (overlap with minor, 7H), 0.89-0.88 (overlapping s, 3H).  $^{13}\text{C}\{^1\text{H}\}$  (126 MHz,  $\text{DMSO}-d_6$ )  $\delta$ : 171.9, 160.0 (minor), 158.3, 157.4, 157.3 (minor), 131.2, 131.2 (minor), 130.4 (minor), 130.2, 81.8, 75.2 (minor), 54.9 (minor), 54.8, 48.1, 48.0, 46.9 (minor), 35.3 (minor), 31.4, 29.3, 26.9, 22.5, 21.3 (minor), 20.6 (minor), 19.8 (minor), 19.7, 19.3, 17.4. Melting point: 193 – 197 °C.

***rac*-((1*S*,2*R*,*E*)-2-Allyl-1-hydroxy-3-(hydroxyimino)-2-methylcyclohexyl)(pyrrolidin-1-yl)methanone (*cis*-1s):** The ketone was synthesized according to general procedure B from 2-

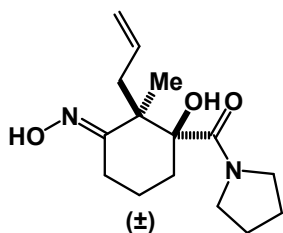

allyl-2-methylcyclohexane-1,3-dione<sup>7</sup> (0.600 g, 3.61 mmol, 1 equiv.) with *N*-formylpyrrolidine<sup>9</sup> (0.358 g, 3.61 mmol, 1 equiv.) and freshly prepared LDA solution (10.83 mmol, 3 equiv.), and stirred for 3 h at -78 °C to afford the *cis*-isomer as the major product. The oxime was synthesized using ammonium acetate as the promoter with 3 equivalents of  $\text{NH}_2\text{OH} \cdot \text{HCl}$  and sodium acetate at 50 °C for 4 days and obtained as a colourless solid upon trituration with methanol (1 mL) following column chromatography purification (0.128 g, 13 % overall yield from dione, dr > 20:1).  $^1\text{H}$  NMR (500 MHz,  $\text{DMSO}-d_6$ )  $\delta$ : 10.01 (s, 1H), 5.62-5.54 (m, 1H), 5.13 (s, 1H), 4.96-4.90 (m, 2H), 3.81-3.68 (m, 2H), 3.28-3.24 (m, 2H), 2.83 (dt,  $J = 14.5, 4.5$  Hz, 1H), 2.52-2.48 (m, overlap with DMSO, 1H), 2.10-2.06 (m, 1H), 1.89-1.75 (m, 5H), 1.65-1.53 (m, 4H), 1.00 (s, 3H).  $^{13}\text{C}\{^1\text{H}\}$  (126 MHz,  $\text{DMSO}-d_6$ )  $\delta$ : 171.8, 159.7, 135.6, 116.3, 80.5, 44.7, 47.7, 47.6, 37.9, 31.4, 26.8, 22.5, 19.6, 19.1, 17.5. Melting point: 197 – 201 °C (decomp.).

***rac*-((1*S*,2*S*,*E*)-2-Allyl-1-hydroxy-3-(hydroxyimino)-2-methylcyclohexyl)(pyrrolidin-1-yl)methanone (*trans*-1s):** The ketone was synthesized in the same reaction as above and

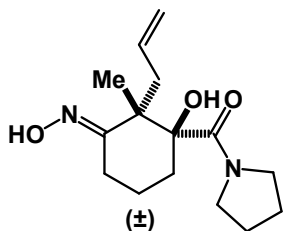

isolated as the minor isomer. The oxime was synthesized using ammonium acetate promoter with 3 equivalents of  $\text{NH}_2\text{OH} \cdot \text{HCl}$  and sodium acetate at 50 °C for 3 days and obtained as a colourless solid

(0.029 g, 3 % overall yield from dione, dr 20:1).  $^1\text{H}$  NMR (500 MHz,  $\text{DMSO-}d_6$ )  $\delta$ : 10.27 (s, 1H), 5.50 (m, 1H), 4.94-4.88 (m, overlapped with OH, 3H), 3.93-3.89 (m, 1H), 3.72-3.64 (m, 1H), 3.32-3.27 (m, 2H), 3.05-3.01 (m, 1H), 2.66-2.62 (m, 1H), 2.47-2.44 (m, overlapped with DMSO, 1H), 2.08-2.03 (m, 1H), 1.86-1.51 (m, 8H), 0.89-0.88 (overlapping s, 3H).  $^{13}\text{C}\{^1\text{H}\}$  (126 MHz,  $\text{DMSO-}d_6$ )  $\delta$ : 171.6, 159.1, 135.1, 116.5, 81.5, 48.0, 48.0, 47.9, 39.7, 31.5, 26.9, 22.4, 19.4, 19.1, 17.6. Melting point: 179 – 182 °C (decomp.).

***rac-tert-Butyl 3-((1S,2R,E)-2-hydroxy-6-(hydroxyimino)-1-methyl-2-(pyrrolidine-1-carbonyl)cyclohexyl)propanoate (cis-1t)***: The ketone was synthesized according to general

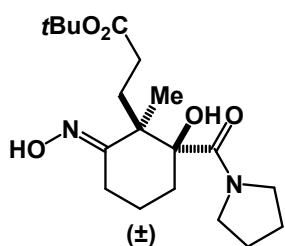

procedure B from *tert*-butyl 3-(1-methyl-2,6-dioxocyclohexyl)propanoate<sup>8</sup> (0.485 g, 1.91 mmol, 1 equiv.) with *N*-formylpyrrolidine<sup>9</sup> (0.189 g, 1.91 mmol, 1 equiv.) and freshly prepared LDA solution (5.72 mmol, 3 equiv.), and stirred for 3 h at -78 °C to afford the *cis*-isomer as the major product. The oxime was synthesized using ammonium acetate as the promoter with 5 equivalents of  $\text{NH}_2\text{OH}$

• HCl and sodium acetate at 50 °C for 2 days and obtained as a colourless solid (0.133 g, 19 % overall yield from dione, dr > 20:1).  $^1\text{H}$  NMR (500 MHz,  $\text{DMSO-}d_6$ )  $\delta$ : 10.1 (s, 1H), 5.16 (s, 1H), 3.81-3.78 (m 1H), 3.71-3.66 (m, 1H), 3.27-3.24 (m, 2H), 2.75-2.70 (m, 1H), 2.02-1.74 (m, 8H), 1.66-1.52 (m, 5H), 1.37 (s, 9H), 0.97 (s, 3H).  $^{13}\text{C}\{^1\text{H}\}$  (126 MHz,  $\text{DMSO-}d_6$ )  $\delta$ : 172.9, 171.8, 159.9, 80.9, 79.3, 47.7, 47.6, 47.3, 31.2, 29.9, 27.9, 27.8, 26.8, 22.5, 19.4, 18.9, 17.2. Melting point: 202 – 204 °C (decomp.).

***rac-tert-Butyl 3-((1S,2S,E)-2-hydroxy-6-(hydroxyimino)-1-methyl-2-(pyrrolidine-1-carbonyl)cyclohexyl)propanoate (trans-1t)***: The ketone was synthesized in the same reaction

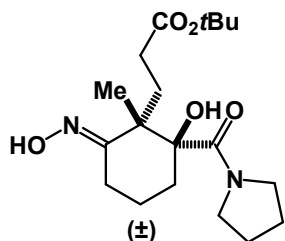

as above and isolated as the minor isomer. The oxime was synthesized using ammonium acetate promoter with 5 equivalents of  $\text{NH}_2\text{OH} \cdot \text{HCl}$  and sodium acetate at 50 °C for 5 days and obtained as a colourless solid (0.040 g, 6 % overall yield from dione, dr > 20:1).  $^1\text{H}$  NMR (500 MHz,  $\text{DMSO-}d_6$ )  $\delta$ : 10.38 (s, 1H), 5.00 (s, 1H), 3.91-3.87 (m, 1H), 3.70-3.64 (m, 1H), 3.31-3.27 (m, overlap with water, 2H), 3.00-2.98

(m, 1H), 2.46-2.41 (m, 1H), 2.03-1.92 (m, 2H), 1.83-1.54 (m, 10 H), 1.36 (s, 9H), 0.97 (s, 3H).  $^{13}\text{C}\{^1\text{H}\}$  (126 MHz,  $\text{DMSO-}d_6$ )  $\delta$ : 172.6, 171.6, 159.2, 81.5, 79.4, 48.0, 47.9, 47.9, 31.4, 30.2, 29.4, 27.7, 26.9, 22.4, 19.1, 19.0, 17.0. Melting point: 210 – 211 °C (decomp.).

### Synthesis of products

#### General procedure for the activation of iminologous diols:

**C:** To an oven-dried 4-dram vial equipped with a magnetic stir bar was added the

corresponding oxime (1 equiv.), then the vial was capped with a B24 septum and the vessel was purged of air with nitrogen. The vial was cooled with an ice/water bath, then THF (2 mL) was added, and the mixture was stirred for 5 minutes. *N,N*-Diisopropylethylamine (1.05 equiv., DIPEA) was added to the solution and stirred for 5 minutes at 0 °C. *p*-Toluenesulfonyl chloride (1.05 equiv., TsCl) was dissolved in THF (0.5 mL), then added dropwise to the stirring solution. The mixture was stirred for 1h, then potassium *tert*-butoxide (2.1 equiv., KO*t*Bu) was added, then the reaction mixture was stirred for 16 h while warming to room temperature. The mixture was loaded onto Celite, then the volatiles were evaporated *in vacuo*. The residue was subjected to normal phase column chromatography to afford the products.

**D:** To an oven-dried 4-dram vial equipped with a magnetic stir bar was added the corresponding oxime (1 equiv.) and KO*t*Bu (2.1 or 2.4 equiv.), then the vial was capped with a B24 septum and the vessel was purged of air with nitrogen. The vial was cooled with an ice/water bath, then THF or 1:1 THF/DMF (1-1.5 mL) was added, and the mixture was stirred for 15 minutes. TsCl (1.1 or 1.4 equiv.) was dissolved in THF (0.5 mL) then added dropwise to the stirring solution. The reaction mixture was stirred for 16 h while warming to room temperature. The mixture was loaded onto Celite, then the volatiles were evaporated *in vacuo*. The residue was subjected to normal phase (Me- or CF<sub>3</sub>-bound) or reversed-phase (amide-bound) column chromatography to afford the products.

**6-Methyl-5-oxoheptanenitrile (2a):** The product was synthesized using general procedure C from **1a** (30 mg, 0.19 mmol, 1 equiv.) as the major product and obtained as a clear oil (6.2 mg, 23% yield). <sup>1</sup>H NMR (400 MHz, CDCl<sub>3</sub>) δ: 2.67-2.57 (overlapping t and p, t: *J* = 7.2 Hz, p: *J* = 6.8 Hz, 3H), 2.41 (t, *J* = 6.8 Hz, 2H), 1.91 (p, *J* = 6.4 Hz, 2H), 1.11 (d, *J* = 6.8 Hz, 6H). <sup>13</sup>C{<sup>1</sup>H} (101 MHz, CDCl<sub>3</sub>) δ: 213.1, 119.4, 41.1, 38.0, 19.4, 18.3, 16.6. HRMS (DART) *m/z* calc'd for C<sub>8</sub>H<sub>14</sub>NO [M+H]<sup>+</sup>: 140.10699; found: 140.10632.

**4-(3,3-Dimethyloxiran-2-yl)butanenitrile (3a):** The product was synthesized using general procedure C from **1a** (30 mg, 0.19 mmol, 1 equiv.) as the minor product and obtained as a clear oil (2.1 mg, 8% yield). <sup>1</sup>H NMR (400 MHz, CDCl<sub>3</sub>) δ: 2.72 (dd, *J* = 8, 4.4 Hz, 1H), 2.46-2.41 (m, 2H), 1.91-1.77 (m, 3H), 1.62-1.55 (m, 2H), 1.32 (s, 3H), 1.28 (s, 3H). <sup>13</sup>C{<sup>1</sup>H} (101 MHz, CDCl<sub>3</sub>) δ: 119.5, 63.3, 58.4, 27.9, 24.8, 23.0, 18.9, 17.1. HRMS (DART) *m/z* calc'd for C<sub>8</sub>H<sub>17</sub>N<sub>2</sub>O [M+NH<sub>4</sub>]<sup>+</sup>: 157.13354; found: 157.13305.

**6,6-Dimethyl-5-oxoheptanenitrile (2b):** The product was synthesized using general procedure D from **1b** (17 mg, 0.1 mmol, 1 equiv.) with KO*t*Bu (2.1 equiv.) and TsCl (1.1 equiv.) in THF (1 mL) as the minor product and

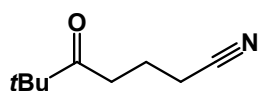

obtained as a clear oil (1.8 mg, 14% yield).  $^1\text{H}$  NMR (400 MHz,  $\text{CDCl}_3$ )  $\delta$ : 2.69 (t,  $J = 6.8$  Hz, 2H), 2.41 (t,  $J = 6.4$  Hz, 2H), 1.91 (p,  $J = 6.4$  Hz, 2H), 1.16 (s, 9H).  $^{13}\text{C}\{^1\text{H}\}$  (101 MHz,  $\text{CDCl}_3$ )  $\delta$ : 214.5, 119.5, 44.3, 34.5, 26.5, 19.7, 16.6. The chemical shifts are in agreement with literature values.<sup>12</sup>

**4-(2,3,3-Trimethyloxiran-2-yl)butanenitrile (3b):** The product was synthesized using general procedure D from **1b** (17 mg, 0.1 mmol, 1 equiv.) with  $\text{KO}t\text{Bu}$  (2.1 equiv.) and  $\text{TsCl}$  (1.1 equiv.) in THF (1 mL) as the major product and obtained as a clear oil (2.2 mg, 14% yield).  $^1\text{H}$  NMR (400 MHz,  $\text{CDCl}_3$ )  $\delta$ : 2.45-2.35 (m, 2H), 1.88-1.61 (m, 6H), 1.34-1.31 (overlapping s, 9H).  $^{13}\text{C}\{^1\text{H}\}$  (101 MHz,  $\text{CDCl}_3$ )  $\delta$ : 119.5, 63.6, 62.3, 33.6, 21.9, 21.4, 21.1, 18.6, 17.5. HRMS (DART)  $m/z$  calc'd for  $\text{C}_9\text{H}_{15}\text{NO}$   $[\text{M}+\text{H}]^+$ : 154.12264; found: 154.12268.

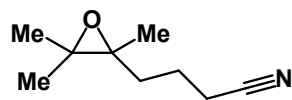

***N,N*-Dibenzyl-2-(3-cyanopropyl)-3,3-dimethyloxirane-2-carboxamide (3c):** The product was synthesized using general procedure D from **1c** (57.1 mg, 0.15 mmol, 1 equiv.) with  $\text{KO}t\text{Bu}$  (2.4 equiv.) and  $\text{TsCl}$  (1.4 equiv.) in THF (1.5 mL) and obtained as a yellow oil (47.7 mg, 88% yield).  $^1\text{H}$  NMR (400 MHz,  $\text{CDCl}_3$ , exists as two rotamers, major conformer integrated)  $\delta$ : 7.44-7.18 (m, 10H, overlap with  $\text{CHCl}_3$  and minor rotamer), 5.10 (d,  $J = 13.6$  Hz, minor), 4.88 (d,  $J = 15.6$  Hz, 1H), 4.70 (d,  $J = 14.8$  Hz, 1H), 4.50 (d,  $J = 16$  Hz, minor), 4.44 (d,  $J = 15.6$  Hz, 1H), 4.28-4.22 (overlapping d,  $J = 16.4, 14.4$ , 1H, overlap with minor rotamer), 4.01 (d,  $J = 14.8$  Hz, minor), 2.58-2.51 (m, minor), 2.41-2.38 (m, 2H), 2.06-1.82 (m, 4H, overlap with minor rotamer), 1.42-1.41 (overlapping s, 6H), 1.35 (s, minor), 1.22 (s, minor).  $^{13}\text{C}\{^1\text{H}\}$  (101 MHz,  $\text{CDCl}_3$ , exists as two rotamers)  $\delta$ : 170.1 (minor), 169.6, 136.8, 136.5, 136.4 (minor), 135.1 (minor), 129.4, 128.9, 128.8, 128.7, 128.7 (minor), 128.3 (minor), 128.0 (minor), 127.9 (minor), 127.8, 127.8 (minor), 126.9 (minor), 119.6 (minor), 119.2, 67.7, 66.8 (minor), 63.6, 62.7 (minor), 49.2, 49.0 (minor), 47.2, 46.6 (minor), 31.1, 28.8 (minor), 23.4, 21.9 (minor), 21.9 (minor), 21.8, 19.9, 19.4 (minor), 17.2, 16.9 (minor). HRMS (ESI)  $m/z$  calc'd for  $\text{C}_{23}\text{H}_{27}\text{N}_2\text{O}_2$   $[\text{M}+\text{H}]^+$ : 363.2067; found: 363.2053.

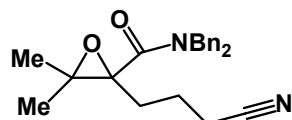

**2-(3-Cyanopropyl)-*N,N*,3,3-tetramethyloxirane-2-carboxamide (3d):** The product was synthesized using general procedure D from **1d** (34.2 mg, 0.15 mmol, 1 equiv.) with  $\text{KO}t\text{Bu}$  (2.4 equiv.) and  $\text{TsCl}$  (1.4 equiv.) in THF (1.5 mL) and obtained as a clear oil which solidifies to become a colourless solid upon sitting in a  $-20$  °C freezer (21.6 mg, 68% yield).  $^1\text{H}$  NMR (500 MHz,  $\text{CDCl}_3$ , two conformers reported as one species)  $\delta$ : 3.11-2.91 (overlapping s, 6H), 2.53-2.50 (m, 1H), 2.39-2.38 (m, 1H), 2.09-2.03 (m, 1H), 1.94-1.66 (m, 3H), 1.39-1.36 (overlapping s, 3H), 1.24-1.22 (overlapping s, 3H).  $^{13}\text{C}\{^1\text{H}\}$  (126 MHz,  $\text{CDCl}_3$ , exists as two rotamers)  $\delta$ : 169.4 (minor),

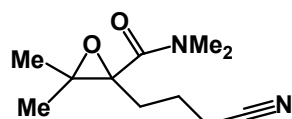



169.2, 119.6 (minor), 119.2, 67.8, 66.6 (minor), 62.9, 62.3 (minor), 36.9, 36.5 (minor), 35.6, 34.8 (minor), 30.8, 28.4 (minor), 23.0, 21.8, 21.7 (minor), 21.5 (minor), 19.8, 19.4 (minor), 17.3, 16.9 (minor). FTIR (neat):  $\nu = 3580, 2971, 2949, 2938, 2238, 1639, 1499, 1452, 1399, 1379, 1274, 1154, 1108, 1090, 907, 879, 834, 768, 743, 696, 582$ . HRMS (DART)  $m/z$  calc'd for  $C_{11}H_{19}N_2O_2$   $[M+H]^+$ : 211.14410; found: 211.14447. Melting point: 49 – 50 °C.

**4-(3,3-Dimethyl-2-(4-phenylpiperazine-1-carbonyl)oxiran-2-yl)butanenitrile (3e):** The

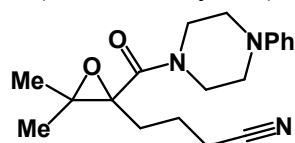

product was synthesized using general procedure D from **1e** (51.8 mg, 0.15 mmol, 1 equiv.) with  $KOtBu$  (2.4 equiv.) and  $TsCl$  (1.4 equiv.) in THF/DMF (1.5 mL) and obtained as an orange oil (21.6 mg, 87% yield).  $^1H$  NMR (500 MHz,  $CDCl_3$ , two conformers reported as one species)  $\delta$ : 7.30-7.26 (m, 2H), 6.95-6.89 (m, 3H), 4.01-3.79 (m, 2H), 3.70-3.47 (m, 2H), 3.29-3.02 (m, 4H), 2.57-2.39 (m, 2H), 2.15-2.05 (m, 1H), 1.95-1.74 (m, 3H), 1.43-1.40 (overlapping s, 3H), 1.30-1.29 (s, 3H).  $^{13}C\{^1H\}$  (126 MHz,  $CDCl_3$ , exists as two rotamers)  $\delta$ : 168.1 (minor), 168.0, 150.9, 150.7 (minor), 129.4 (minor), 129.4, 121.2 (minor), 120.8, 119.5 (minor), 119.1, 117.1 (minor), 116.8, 67.7, 66.4 (minor), 63.2, 62.4 (minor), 50.3 (minor), 50.1, 49.8, 45.3 (minor), 45.2 (minor), 42.1, 41.6 (minor), 30.8, 28.9, 23.0, 22.1 (minor), 21.8, 21.6 (minor), 19.8, 19.5 (minor), 17.3, 16.9 (minor). HRMS (DART)  $m/z$  calc'd for  $C_{19}H_{26}N_3O_2$   $[M+H]^+$ : 328.20195; found: 328.20216.

**4-(3,3-Dimethyl-2-(pyrrolidine-1-carbonyl)oxiran-2-yl)butanenitrile (3f):** The product

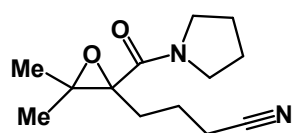

was synthesized using general procedure D from **1f** (38.1 mg, 0.15 mmol, 1 equiv.) with  $KOtBu$  (2.4 equiv.) and  $TsCl$  (1.4 equiv.) in THF (1.5 mL) and obtained as a colourless solid (30.4 mg, 86% yield). Crystals suitable for X-ray crystallography analysis were grown in a mixture of hexanes/DCM using the slow evaporation method at room temperature.  $^1H$  NMR (500 MHz,  $CDCl_3$ )  $\delta$ : 3.72-3.32 (m, 4H), 2.54-2.34 (m, 2H), 2.18-2.13 (m, 1H), 1.98-1.70 (m, 7H), 1.36 (s, 3H), 1.23 (s, 3H).  $^{13}C\{^1H\}$  (126 MHz,  $CDCl_3$ , exists as two rotamers)  $\delta$ : 168.0, 119.6 (minor), 119.3, 68.4, 67.4 (minor), 62.6, 61.9 (minor), 46.7, 46.5 (minor), 46.3, 45.6 (minor), 30.4, 27.8 (minor), 26.5, 23.5 (minor), 22.5, 21.8, 21.7 (minor), 21.4 (minor), 19.9, 19.7 (minor), 17.3, 16.9 (minor). HRMS (DART)  $m/z$  calc'd for  $C_{13}H_{21}N_2O_2$   $[M+H]^+$ : 237.15975; found: 237.16013. Melting point: 74 – 75 °C (decomp.).

**4-(3,3-Dimethyl-2-(morpholine-4-carbonyl)oxiran-2-**

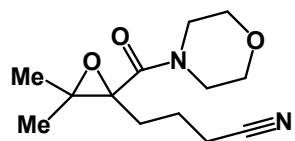

**yl)butanenitrile (3g):** The product was synthesized using general procedure D from **1g** (40.5 mg, 0.15 mmol, 1 equiv.) with  $KOtBu$  (2.4 equiv.) and  $TsCl$  (1.4 equiv.) in THF (1.5 mL) and obtained as a clear oil which solidifies to become a colourless solid upon sitting in a -20 °C freezer (31.7 mg, 84%

yield).  $^1\text{H}$  NMR (500 MHz,  $\text{CDCl}_3$ , two conformers reported as one species)  $\delta$ : 3.92-3.29 (m, 8H), 2.56-2.35 (m, 2H), 2.10-1.69 (m, 4H), 1.38-1.36 (overlapping s, 3H), 1.27-1.26 (overlapping s, 3H).  $^{13}\text{C}\{^1\text{H}\}$  (126 MHz,  $\text{CDCl}_3$ , exists as two rotamers)  $\delta$ : 168.1 (minor), 167.9, 119.5 (minor), 119.1, 67.6, 67.1, 67.0, 67.0 (minor), 66.7 (minor), 66.3 (minor), 63.1, 62.2 (minor), 46.0, 45.8 (minor), 42.4, 41.9 (minor), 30.8, 28.7 (minor), 23.0, 22.0 (minor), 21.8, 21.6 (minor), 19.7, 19.4 (minor), 17.3, 16.9 (minor). HRMS (DART)  $m/z$  calc'd for  $\text{C}_{13}\text{H}_{21}\text{N}_2\text{O}_3$   $[\text{M}+\text{H}]^+$ : 253.15467; found: 253.15507. Melting point: 81 – 82 °C.

**2-(3-Cyanopropyl)-*N*,3,3-trimethyl-*N*-phenyloxirane-2-carboxamide (3h):** The product

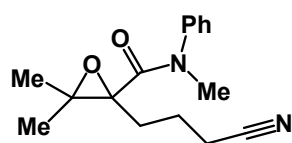

was synthesized using general procedure D from **1h** (43.6 mg, 0.15 mmol, 1 equiv.) with  $\text{KO}t\text{Bu}$  (2.4 equiv.) and  $\text{TsCl}$  (1.4 equiv.) in THF (1.5 mL) and obtained as an orange oil (12.9 mg, 32% yield).  $^1\text{H}$  NMR (500 MHz,  $\text{CDCl}_3$ , multiple conformers reported as one species)  $\delta$ :

7.44-7.14 (m, overlap with  $\text{CHCl}_3$ , 5H), 3.47-3.22 (m, 3H), 2.48-2.32 (m, 2H), 1.97-1.75 (m, 3H), 1.47-1.17 (m, 7H).  $^{13}\text{C}\{^1\text{H}\}$  (126 MHz,  $\text{DMSO}-d_6$ , exists as two rotamers)  $\delta$ : 168.5, 168.5 (minor), 143.3 (minor), 142.6, 128.9 (minor), 128.9, 126.5 (minor), 126.5, 126.0, 120.4, 120.4 (minor), 67.3 (minor), 66.5, 62.7 (minor), 62.0, 37.5 (minor), 37.2, 29.9 (minor), 27.9, 23.0 (minor), 21.9, 21.6, 21.2 (minor), 19.3 (minor), 18.9, 16.2 (minor), 16.0. HRMS (DART)  $m/z$  calc'd for  $\text{C}_{16}\text{H}_{21}\text{N}_2\text{O}_2$   $[\text{M}+\text{H}]^+$ : 273.15975; found: 273.16057.

**2-(3-Cyanopropyl)-*N*-(3-(10,11-dihydro-5*H*-dibenzo[*b,f*]azepin-5-yl)propyl)-*N*,3,3-**

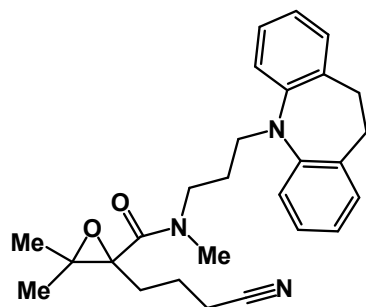

**trimethyloxirane-2-carboxamide (3i):** The product was synthesized using general procedure D from **1i** (67.4 mg, 0.15 mmol, 1 equiv.) with  $\text{KO}t\text{Bu}$  (2.4 equiv.) and  $\text{TsCl}$  (1.4 equiv.) in THF/DMF (1.5 mL) and obtained as a yellow oil (52.2 mg, 81% yield).  $^1\text{H}$  NMR (500 MHz,  $\text{DMSO}-d_6$ , multiple conformers reported as one species)  $\delta$ : 7.15-7.08 (m, 6H), 6.95-6.89 (m, 2H), 3.87-3.10 (m, 9H), 2.90-2.65 (multiple s, 3H), 2.48-2.32 (m, 2H), 1.95-1.45 (m, 6H), 1.29-1.24 (overlapping s, 3H), 1.06-1.00 (overlapping s, 3H).

$^{13}\text{C}\{^1\text{H}\}$  (126 MHz,  $\text{DMSO}-d_6$ , exists as four conformers)  $\delta$ : 168.2, 168.1, 168.0, 167.8, 148.0, 148.0, 148.0, 147.9, 133.7, 133.7, 133.5, 129.8, 129.7, 129.7, 129.7, 126.4, 126.3, 126.3, 122.6, 122.4, 122.4, 122.4, 120.3, 120.3, 120.3, 120.2, 119.7, 119.7, 119.7, 67.1, 67.1, 66.3, 66.2, 62.1, 61.9, 61.5, 61.5, 47.2, 47.2, 47.1, 46.4, 46.3, 44.6, 43.9, 34.1, 34.0, 32.3, 31.5, 31.5, 31.5, 31.4, 30.2, 30.0, 28.4, 28.0, 26.2, 25.5, 24.9, 24.9, 22.7, 22.6, 21.5, 21.4, 21.3, 21.3, 21.3, 21.1, 19.2, 18.8, 18.8, 16.1, 16.1, 15.8, 15.7. HRMS (DART)  $m/z$  calc'd for  $\text{C}_{26}\text{H}_{32}\text{N}_3\text{O}_2$   $[\text{M}+\text{H}]^+$ : 418.24890; found: 418.24917.

**4-(3,3-Dimethyl-2-(trifluoromethyl)oxiran-2-yl)butanenitrile (3j):** The product was

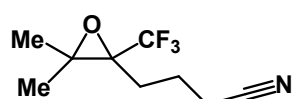

synthesized using general procedure D from **1j** (33.8 mg, 0.15 mmol, 1 equiv.) with KHMDS (2.2 equiv.) and TsCl (1.1 equiv.) in THF (1.5 mL) and obtained as a clear oil (7.5 mg, 24% yield).  $^1\text{H}$  NMR (500 MHz,  $\text{CDCl}_3$ )  $\delta$ : 2.42 (t,  $J = 6.6$  Hz, 2H), 2.09-2.03 (m, 1H), 1.92-1.81 (m, 3H), 1.49 (s, 3H), 1.42 (s, 3H).  $^{13}\text{C}\{^1\text{H}\}$  (126 MHz,  $\text{CDCl}_3$ )  $\delta$ : 124.8 (q,  $J = 280$  Hz), 119.0, 63.7 (q,  $J = 34$  Hz), 62.3, 26.6 (q,  $J = 1.3$  Hz), 22.0, 21.0, 20.0 (q,  $J = 2.5$  Hz), 17.4.  $^{19}\text{F}$  NMR (376 MHz,  $\text{CDCl}_3$ )  $\delta$ : -67.12. HRMS (DART)  $m/z$  calc'd for  $\text{C}_9\text{H}_{12}\text{NOF}_3$   $[\text{M}+\text{H}]^+$ : 208.09438; found: 208.09431.

**4-(2-(Pyrrolidine-1-carbonyl)-1-oxaspiro[2.2]pentan-2-yl)butanenitrile (3k):** The product

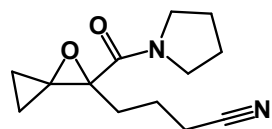

was synthesized using general procedure D from **1k** (37.8 mg, 0.15 mmol, 1 equiv.) with  $\text{KO}t\text{Bu}$  (2.4 equiv.) and TsCl (1.4 equiv.) in THF (1.5 mL) and obtained as a clear oil (8.2 mg, 23% yield).  $^1\text{H}$  NMR (400 MHz,  $\text{CDCl}_3$ )  $\delta$ : 3.70-3.64 (m, 1H), 3.57-3.46 (m, 3H), 2.43 (t,  $J = 7.1$  Hz, 2H), 2.34-2.27 (m, 1H), 2.03-1.78 (m, 7H), 1.12-1.05 (m, 4H).  $^{13}\text{C}\{^1\text{H}\}$  (101 MHz,  $\text{CDCl}_3$ )  $\delta$ : 166.9, 119.2, 64.9, 62.8, 46.5, 46.4, 31.2, 26.4, 23.5, 20.9, 17.1, 2.6, 2.5. HRMS (DART)  $m/z$  calc'd for  $\text{C}_{13}\text{H}_{19}\text{N}_2\text{O}_2$   $[\text{M}+\text{H}]^+$ : 235.14410; found: 235.14420.

**4-(2-(Pyrrolidine-1-carbonyl)-1-oxaspiro[2.4]heptan-2-yl)butanenitrile (3l):** The product

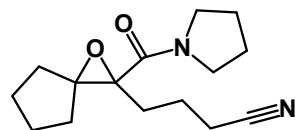

was synthesized using general procedure D from **1l** (42.1 mg, 0.15 mmol, 1 equiv.) with  $\text{KO}t\text{Bu}$  (2.4 equiv.) and TsCl (1.4 equiv.) in THF/DMF (1.5 mL) and obtained as a yellow oil (31.6 mg, 80% yield).  $^1\text{H}$  NMR (400 MHz,  $\text{CDCl}_3$ )  $\delta$ : 3.60-3.40 (m, 4H), 2.43-2.40 (m, 2H), 2.30-2.23 (m, 1H), 1.98-1.48 (m, 15H).  $^{13}\text{C}\{^1\text{H}\}$  (101 MHz,  $\text{CDCl}_3$ )  $\delta$ : 167.9, 119.3, 73.5, 66.6, 46.8, 46.3, 31.4, 30.3, 26.6, 25.2, 25.1, 23.6, 21.8, 17.2. HRMS (DART)  $m/z$  calc'd for  $\text{C}_{15}\text{H}_{23}\text{N}_2\text{O}_2$   $[\text{M}+\text{H}]^+$ : 263.17540; found: 263.17498.

**4-(2-(Pyrrolidine-1-carbonyl)-1-oxaspiro[2.4]hept-5-en-2-yl)butanenitrile (3m):** The

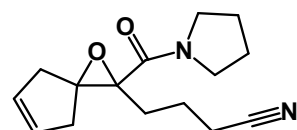

product was synthesized using general procedure D from **1m** (41.8 mg, 0.15 mmol, 1 equiv.) with  $\text{KO}t\text{Bu}$  (2.4 equiv.) and TsCl (1.4 equiv.) in THF/DMF (1.5 mL) and obtained as a yellow oil (27.2 mg, 70% yield).  $^1\text{H}$  NMR (400 MHz,  $\text{CDCl}_3$ )  $\delta$ : 5.76 (s, 2H), 3.61-3.45 (m, 4H), 2.78 (d,  $J = 18$  Hz, 1H), 2.60 (br, 1H), 2.46-2.22 (m, 5H), 1.96-1.74 (m, 6H), 1.63-1.53 (m, 1H).  $^{13}\text{C}\{^1\text{H}\}$  (101 MHz,  $\text{CDCl}_3$ )  $\delta$ : 167.4, 128.7, 128.0, 119.2, 71.1, 66.2, 46.8, 46.2, 37.6, 37.0, 30.8, 26.5, 23.5, 21.7, 17.1. HRMS (DART)  $m/z$  calc'd for  $\text{C}_{15}\text{H}_{21}\text{N}_2\text{O}_2$   $[\text{M}+\text{H}]^+$ : 261.15975; found: 261.16008.

**3-(3,3-Dimethyl-2-(pyrrolidine-1-carbonyl)oxiran-2-yl)propanenitrile (3n):** The product

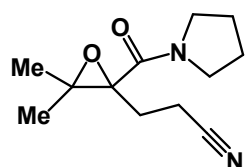

was synthesized using general procedure D from **1n** (25.0 mg, 0.104 mmol, 1 equiv.) with  $\text{KO}t\text{Bu}$  (2.4 equiv.) and TsCl (1.4 equiv.) in THF (1

mL) and obtained as a yellow oil (13.2 mg, 57% yield).  $^1\text{H}$  NMR (500 MHz,  $\text{CDCl}_3$ )  $\delta$ : 3.68-3.46 (m, 4H), 2.66-2.61 (m, 1H), 2.52-2.43 (m, 2H), 1.97-1.87 (m, 4H), 1.76-1.74 (br, 1H), 1.39 (s, 3H), 1.27 (s, 3H).  $^{13}\text{C}\{^1\text{H}\}$  (126 MHz,  $\text{CDCl}_3$ )  $\delta$ : 167.3, 119.0, 67.3, 62.9, 47.1, 46.6, 27.7, 26.5, 23.5, 22.1, 20.0, 13.9. HRMS (DART)  $m/z$  calc'd for  $\text{C}_{12}\text{H}_{19}\text{N}_2\text{O}_2$   $[\text{M}+\text{H}]^+$ : 223.14410; found: 223.14380.

**5-(3,3-Dimethyl-2-(pyrrolidine-1-carbonyl)oxiran-2-yl)pentanenitrile (3o):** The product

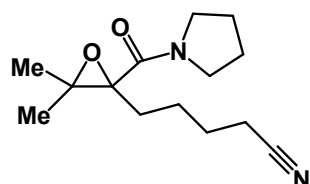

was synthesized using general procedure D from **1o** (40.3 mg, 0.15 mmol, 1 equiv.) with  $\text{KO}t\text{Bu}$  (2.4 equiv.) and  $\text{TsCl}$  (1.4 equiv.) in THF (1.5 mL) and obtained as a clear oil (12.2 mg, 32% yield).  $^1\text{H}$  NMR (500 MHz,  $\text{CDCl}_3$ )  $\delta$ : 3.70-3.34 (m, 4H), 2.38-2.30 (m, 2H), 2.18-2.12 (m, 1H), 1.93-1.52 (m, 9H), 1.35 (s, 3H), 1.24 (s, 3H).

$^{13}\text{C}\{^1\text{H}\}$  (126 MHz,  $\text{CDCl}_3$ )  $\delta$ : 168.4, 119.5, 69.0, 62.5, 46.8, 46.3, 30.7, 26.6, 25.6, 24.7, 23.6, 22.5, 20.0, 17.2. HRMS (DART)  $m/z$  calc'd for  $\text{C}_{14}\text{H}_{23}\text{N}_2\text{O}_2$   $[\text{M}+\text{H}]^+$ : 251.17540; found: 251.17548.

**(9,9-Dimethyl-7-oxa-8-azabicyclo[4.2.1]non-1(8)-en-6-yl)(pyrrolidin-1-yl)methanone**

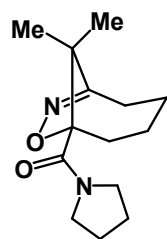

**(3oa):** The product was synthesized in the same reaction as **3o**, but further purified by normal phase column chromatography and obtained as a clear oil (6.4 mg, 18%).  $^1\text{H}$  NMR (500 MHz,  $\text{CDCl}_3$ )  $\delta$ : 3.88-3.78 (m, 2H), 3.53-3.45 (m, 2H), 2.66-2.62 (m, 1H), 2.52-2.45 (m, 1H), 1.99-1.75 (m, 9H), 1.41-1.37 (overlap with s, 4H), 1.21 (s, 3H).  $^{13}\text{C}\{^1\text{H}\}$  (126 MHz,  $\text{CDCl}_3$ )  $\delta$ : 171.7, 168.0, 96.5, 51.2, 47.8, 47.4, 33.6, 27.0, 26.8, 26.3, 24.7, 23.4, 22.0, 18.8. HRMS (DART)  $m/z$  calc'd for  $\text{C}_{14}\text{H}_{23}\text{N}_2\text{O}_2$   $[\text{M}+\text{H}]^+$ : 251.17540; found: 251.17614.

**4-(3,3-Dimethyl-2-(pyrrolidine-1-carbonyl)oxiran-2-yl)-3,3-dimethylbutanenitrile (3p):**

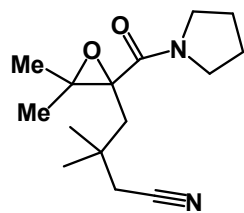

The product was synthesized using general procedure D from **1p** (42.4 mg, 0.15 mmol, 1 equiv.) with  $\text{KO}t\text{Bu}$  (2.4 equiv.) and  $\text{TsCl}$  (1.4 equiv.) in THF/DMF (1.5 mL) and obtained as a clear oil which solidifies to become a colourless solid upon sitting in a  $-20\text{ }^\circ\text{C}$  freezer (14.8 mg, 37% yield).  $^1\text{H}$  NMR (400 MHz,  $\text{CDCl}_3$ , two conformers reported as one species)  $\delta$ : 3.70-3.27 (m, 4H), 2.66-2.55 (m, 1H), 2.42-2.15 (m, 2H), 2.07-1.52 (m, 5H), 1.40-1.38 (two s, 3H), 1.23-1.20 (two s, 3H), 1.19-1.15 (two s, 3H), 1.13 (s, 3H).  $^{13}\text{C}\{^1\text{H}\}$  (101 MHz,  $\text{CDCl}_3$ , exists as two rotamers in equal ratio)  $\delta$ : 169.0, 168.8, 118.9, 118.6, 67.0, 65.8, 62.0, 60.4, 47.4, 47.0, 46.9, 45.8, 40.1, 39.0, 34.8, 33.8, 30.5, 29.5, 29.0, 28.6, 28.4, 26.6, 26.5, 23.9, 23.3, 21.6, 21.1, 20.8, 19.7. HRMS (DART)  $m/z$  calc'd for  $\text{C}_{15}\text{H}_{25}\text{N}_2\text{O}_2$   $[\text{M}+\text{H}]^+$ : 265.19105; found: 265.19116. Melting point:  $74 - 76\text{ }^\circ\text{C}$ .

***tert*-Butyl (cyanomethyl)((3,3-dimethyl-2-(pyrrolidine-1-carbonyl)oxiran-2-yl)methyl)-**

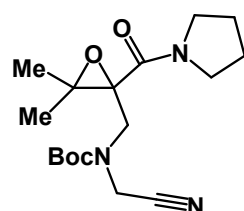

**carbamate (3q):** The product was synthesized using general procedure D from **1q** (21.3 mg, 0.060 mmol, 1 equiv.) with KO<sup>t</sup>Bu (2.4 equiv.) and TsCl (1.4 equiv.) in THF/DMF (1 mL) and obtained as a clear oil (15.0 mg, 74% yield). <sup>1</sup>H NMR (500 MHz, CDCl<sub>3</sub>, multiple conformers reported as one species) δ: 3.68-3.46 (m, 4H), 2.66-2.61 (m, 1H), 2.52-2.43 (m, 2H), 1.97-1.87 (m, 4H), 1.76-1.74 (br, 1H), 1.39 (s, 3H), 1.27 (s, 3H). <sup>13</sup>C{<sup>1</sup>H} (126 MHz, CDCl<sub>3</sub>, exists as two rotamers) δ: 167.0, 165.6 (minor), 154.0, 116.2 (minor), 116.0, 82.4, 82.3 (minor) 67.6, 67.2 (minor), 62.3 (minor), 60.2, 48.4, 46.7, 46.4 (minor), 46.1, 45.7, 37.4 (minor), 36.4 (minor), 35.5 (minor), 28.2, 28.1 (minor), 26.4, 26.3 (minor), 23.9, 23.6 (minor), 22.3 (minor), 21.8, 20.0 (minor), 19.5. HRMS (DART) m/z calc'd for C<sub>17</sub>H<sub>28</sub>N<sub>3</sub>O<sub>4</sub> [M+H]<sup>+</sup>: 338.20743; found: 338.20760.

**Diethyl 4,5,6,7-tetrahydrobenzo[*c*]isoxazole-3,3(3*a*H)-dicarboxylate (5a):** The product was synthesized using general procedure C from **4a** (43.1 mg, 0.15 mmol, 1 equiv.) as the major product and obtained as a colourless solid (21.1 mg, 52% yield). Crystals suitable for X-ray crystallography analysis were grown in CDCl<sub>3</sub> using the slow evaporation method at room temperature. <sup>1</sup>H NMR (400 MHz, CDCl<sub>3</sub>) δ: 4.35-4.18 (m, 4H), 3.93 (dd, *J* = 12.6, 6 Hz, 1H), 2.80-2.75 (m, 1H), 2.19-2.04 (m, 2H), 2.00-1.95 (m, 1H), 1.91-1.85 (m, 1H), 1.49-1.15 (m, 9H). <sup>13</sup>C{<sup>1</sup>H} (101 MHz, CDCl<sub>3</sub>) δ: 167.1, 166.5, 159.5, 89.5, 62.9, 62.3, 53.9, 28.8, 25.7, 25.1, 24.3, 14.3, 14.0. FTIR (neat): ν = 2975, 2938, 2865, 1761, 1729, 1464, 1449, 1304, 1269, 1240, 1203, 1134, 1062, 1026, 943, 856, 826, 767, 743, 689, 657. HRMS (DART) m/z calc'd for C<sub>13</sub>H<sub>20</sub>NO<sub>5</sub> [M+H]<sup>+</sup>: 270.13383; found: 270.13393. Melting point: 61 – 63 °C (decomp.).

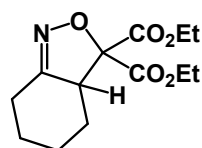

**Diethyl 3*a*-methyl-4,5,6,7-tetrahydrobenzo[*c*]isoxazole-3,3(3*a*H)-dicarboxylate (5b):** To an oven-dried 4-dram vial equipped with a magnetic stir bar was added **4b** (41.9 mg, 0.14 mmol, 1 equiv.), then the vial was capped with a B24 septum and the vessel was purged of air with nitrogen. The vial was cooled with an ice/water bath, then DCM (1.3 mL) was added, and the mixture was stirred for 5 minutes. DIPEA (0.051 mL, 0.293 mmol, 2.1 equiv.) was added to the solution and stirred for 5 minutes at 0 °C. Trifluoromethanesulfonic anhydride (0.146 mL, 0.146 mmol, 1.1 equiv., 1 M in DCM) was added dropwise, then the reaction mixture was stirred for 16 h while warming to room temperature. The mixture was loaded onto Celite, then the volatiles were evaporated *in vacuo*. The residue was subjected to reversed-phase column chromatography to afford the product as a clear oil (31.5 mg, 80% yield). <sup>1</sup>H NMR (500 MHz, CDCl<sub>3</sub>) δ: 4.31-4.18 (m, 4H), 2.71-2.66 (m, 1H), 2.21-2.15 (m, 1H), 1.98-1.92 (m, 2H), 1.78-1.67 (m, 2H), 1.59-1.51 (m, 1H), 1.42-1.34 (m, 1H), 1.32-1.25 (overlapping t and s, *J* = 7.1, 5.8 Hz, 9H). <sup>13</sup>C{<sup>1</sup>H} (126 MHz, CDCl<sub>3</sub>) δ: 166.4, 165.8, 163.7, 93.3, 62.2, 62.2, 56.4, 34.1, 25.5, 23.3, 21.3, 18.9, 14.1, 14.1. HRMS (DART) m/z calc'd for C<sub>14</sub>H<sub>22</sub>NO<sub>5</sub> [M+H]<sup>+</sup>: 284.14925; found: 284.14989.

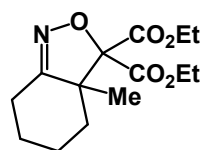

***N,N*-Dibenzyl-5-cyano-2-hydroxy-2-(prop-1-en-2-yl)pentanamide (6):** To an oven-dried 1-dram vial equipped with a stir bar was added **3c** (18.1 mg, 0.05 mmol, 1 equiv.), then the vial was capped with a B19 septum and the vessel was purged of air with nitrogen. THF (0.5 mL) was added, then the solution was stirred at room temperature for 5 minutes before the dropwise addition of SmI<sub>2</sub> (0.2 mL, 0.10 mmol, 2 equiv., 0.5 M in THF). The mixture was stirred for 16 h at room temperature then loaded onto Celite. The volatiles were removed *in vacuo*, then the residue was subjected to reversed-phase column chromatography to afford the product as a clear oil (4.4 mg, 24%, 6 mg of **3c** recovered). <sup>1</sup>H NMR (500 MHz, CDCl<sub>3</sub>) δ: 7.42-7.40 (m, 6H), 7.21-7.12 (m, 4H), 5.10 (s, 1H), 5.04-5.02 (m, 2H), 4.84 (d, *J* = 14.6 Hz, 1H), 4.76 (d, *J* = 15.8 Hz, 1H), 4.59 (d, *J* = 15.8 Hz, 1H), 4.33 (d, *J* = 14.6 Hz, 1H), 2.30-2.19 (m, 2H), 2.09-2.04 (m, H), 1.97-1.92 (m, 2H), 1.73 (s, 3H), 1.54-1.47 (m, 1H). <sup>13</sup>C{<sup>1</sup>H} (126 MHz, CDCl<sub>3</sub>) δ: 173.8, 146.1, 136.5, 135.8, 129.3, 129.1, 128.8, 128.0, 126.8, 119.5, 112.9, 78.0, 50.1, 49.6, 34.9, 20.5, 19.1, 17.4. HRMS (DART) *m/z* calc'd for C<sub>23</sub>H<sub>27</sub>N<sub>2</sub>O<sub>2</sub> [M+H]<sup>+</sup>: 363.20670; found: 363.20645.

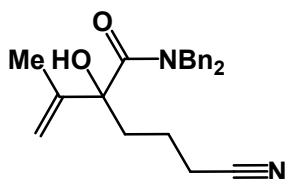

**6-Fluoro-5-hydroxy-6-methyl-5-(morpholine-4-carbonyl)heptanenitrile (7a):** To an oven-dried 1-dram vial equipped with a stir bar was added **3g** (25.2 mg, 0.10 mmol, 1 equiv.), then the vial was capped with a B19 septum and the vessel was purged of air with nitrogen. DCM (1 mL) was added, then the solution was stirred at room temperature for 5 minutes before the addition of BF<sub>3</sub> • OEt<sub>2</sub> (14 μL, 0.11 mmol, 1.1 equiv.). The mixture was stirred for 2 h at room temperature then loaded onto Celite. The volatiles were removed *in vacuo*, then the residue was subjected to reversed-phase column chromatography to afford the product as a clear oil (10.1 mg, 37%). <sup>1</sup>H NMR (500 MHz, CDCl<sub>3</sub>) δ: 5.36 (br, 1H), 4.16-3.37 (m, 8H), 2.57-2.25 (m, 3H), 1.93-1.81 (m, 2H), 1.49-1.27 (overlapping m, 7H). <sup>13</sup>C{<sup>1</sup>H} (126 MHz, CDCl<sub>3</sub>) δ: 171.7, 119.4, 98.2 (dd, *J* = 178, 4 Hz), 80.1 (d, *J* = 26 Hz), 67.0, 66.4, 47.7, 45.3, 31.8, 23.4 (d, *J* = 24 Hz), 23.0 (d, *J* = 25 Hz), 20.4, 17.6. <sup>19</sup>F NMR (376 MHz, CDCl<sub>3</sub>) δ: -143.84 (m). FTIR (neat): ν = 3369, 2990, 2952, 2863, 2255, 1616, 1468, 1438, 1390, 1372, 1234, 1116, 1067, 1039, 919, 848, 734, 609. HRMS (DART) *m/z* calc'd for C<sub>13</sub>H<sub>22</sub>N<sub>2</sub>O<sub>3</sub>F [M+H]<sup>+</sup>: 273.16090; found: 273.16086.

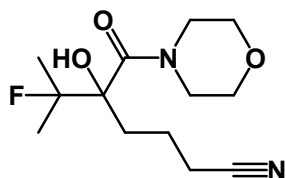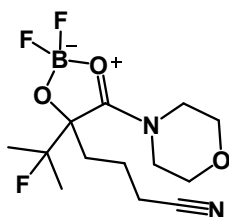

**4-(2,2-Difluoro-4-(2-fluoropropan-2-yl)-5-morpholino-2,4-dihydro-1λ<sup>3</sup>,3,2λ<sup>4</sup>-dioxaborol-4-yl)butanenitrile (7b):** The product was isolated in the same reaction as described above as a colourless solid (15.4 mg, 48%). Crystals suitable for x-ray crystallography analysis were grown in a mixture of CDCl<sub>3</sub> and hexanes using the slow evaporation method at room

temperature.  $^1\text{H}$  NMR (500 MHz,  $\text{CDCl}_3$ )  $\delta$ : 4.17-4.10 (m, 2H), 3.97-3.88 (m, 2H), 3.80-3.74 (m, 4H), 2.60 (dt,  $J = 17.2, 5.4$  Hz, 1H), 2.40-2.34 (m, 1H), 2.25-2.19 (m, 1H), 2.13-2.02 (m, 2H), 1.53 (d,  $J = 23.2$  Hz, 3H), 1.46 (d,  $J = 22.8$  Hz, 3H), 1.38-1.30 (m, 1H).  $^{13}\text{C}\{^1\text{H}\}$  (126 MHz,  $\text{CDCl}_3$ )  $\delta$ : 179.1, 119.4, 98.5 (dd,  $J = 178, 4$  Hz), 88.8 (d,  $J = 27$  Hz), 66.4, 66.3 (rotamer), 66.3 (rotamer), 49.2 (rotamer), 49.1 (rotamer), 48.5, 31.3 (d,  $J = 2$  Hz), 23.8-23.6 (rotamer d,  $J = 23$  Hz), 22.8 (d,  $J = 24$  Hz), 20.3, 17.4.  $^{11}\text{B}$  NMR (128 MHz,  $\text{CDCl}_3$ )  $\delta$ : 5.08.  $^{19}\text{F}$  NMR (376 MHz,  $\text{CDCl}_3$ )  $\delta$ : -142.11 - -142.35 (m), -145.17 (d,  $J = 70$  Hz,  $^{10}\text{B-F}$ ), -145.23 (d,  $J = 70$  Hz,  $^{11}\text{B-F}$ ), -147.06 (d,  $J = 70$  Hz,  $^{10}\text{B-F}$ ), -147.14 (d,  $J = 70$  Hz,  $^{11}\text{B-F}$ ). HRMS (DART)  $m/z$  calc'd for  $\text{C}_{13}\text{H}_{24}\text{BN}_3\text{O}_3\text{F}_3$   $[\text{M}+\text{NH}_4]^+$ : 338.18573; found: 338.18564. Melting point: 135 – 136 °C.

**1-(3,3-Dimethyl-2-(morpholine-4-carbonyl)oxiran-2-yl)octan-4-one (8):** To an oven-dried

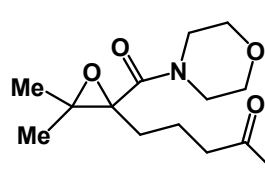

2-dram vial equipped with a stir bar was added **3g** (44.1 mg, 0.175 mmol, 1 equiv.), then the vial was capped with a B24 septum and the vessel was purged of air with nitrogen. THF (1.7 mL) was added,

then the solution was cooled with a dry ice/acetone bath for 20 minutes before the addition of *n*BuLi (74  $\mu\text{L}$ , 0.184 mmol, 1.05 equiv.). The mixture was stirred overnight while warming to room temperature then loaded onto Celite. The volatiles were removed *in vacuo*, then the residue was subjected to reversed-phase column chromatography to afford the product as a clear oil (7.4 mg, 14%, 26.6 mg of **3g** recovered).  $^1\text{H}$  NMR (500 MHz,  $\text{CDCl}_3$ , multiple conformers reported as one species)  $\delta$ : 3.92-3.29 (m, 8H), 2.62-2.34 (m, 4H), 2.03-1.89 (m, H), 1.82-1.75 (m, 1H), 1.71-1.63 (m, 1H), 1.58-1.50 (m, 3H), 1.35-1.34 (overlapping s, 3H), 1.31-1.26 (m, 5H), 0.91-0.87 (m, 3H).  $^{13}\text{C}\{^1\text{H}\}$  (126 MHz,  $\text{CDCl}_3$ , exists as two rotamers)  $\delta$ : 211.3 (minor), 210.5, 168.6, 168.5 (minor), 68.5, 67.2, 67.1, 67.1 (minor), 67.1 (minor), 66.8 (minor), 63.0, 61.7 (minor), 46.1, 45.9 (minor), 42.7 (minor), 42.7 (minor), 42.4, 42.4, 41.9 (minor), 41.4 (minor), 31.1, 29.6 (minor), 26.1, 23.1, 22.5 (minor), 22.5, 22.1 (minor), 19.8, 19.8, 19.6 (minor), 19.4, 14.0. HRMS (DART)  $m/z$  calc'd for  $\text{C}_{17}\text{H}_{30}\text{NO}_4$   $[\text{M}+\text{H}]^+$ : 312.21693; found: 312.21631.

**rac-4-((2*S*,3*R*)-3-(4-Methoxybenzyl)-3-methyl-2-(pyrrolidine-1-carbonyl)oxiran-2-**

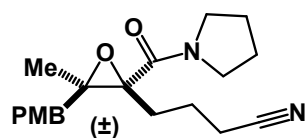

**yl)butanenitrile (*trans*-3r):** The product was synthesized using general procedure D from *cis*-**1r** (54.1 mg, 0.15 mmol, 1 equiv.) with *KOt*Bu (2.4 equiv.) and *TsCl* (1.4 equiv.) in THF/DMF (1.5 mL), and further purified by normal phase column chromatography to be

obtained as a clear oil (32.5 mg, 63% yield, dr 20:1).  $^1\text{H}$  NMR (500 MHz,  $\text{CDCl}_3$ , two conformers reported as one species)  $\delta$ : 7.19 (m, 2H), 6.86 (m, 2H), 3.79 (s, 3H), 3.74-3.72 (m, 1H), 3.56-3.45 (m, 3H), 3.32-3.27 (m, minor), 3.15-3.09 (m, minor), 2.92-2.83 (q,  $J = 15$  Hz, 2H), 2.62-2.59 (m, minor), 2.44-2.38 (m overlap with minor, 2H), 2.30-2.28 (m, minor), 2.00-1.72 (m, 8H), 1.14 (s, 3H).  $^{13}\text{C}\{^1\text{H}\}$  (126 MHz,  $\text{CDCl}_3$ , exists as two rotamers)  $\delta$ : 168.0, 167.8

(minor), 158.7 (minor), 158.5, 130.7 (minor), 130.3, 128.6, 128.4 (minor), 119.7 (minor), 119.2, 114.2, 68.8, 67.9 (minor), 65.1, 65.0 (minor), 55.4, 46.9, 46.4, 45.7 (minor), 38.9 (minor), 38.6, 30.6, 28.0 (minor), 26.6, 26.5 (minor), 23.9 (minor), 23.5, 22.0, 21.9 (minor), 19.6, 18.6 (minor), 17.4, 17.0 (minor). HRMS (DART)  $m/z$  calc'd for  $C_{20}H_{27}N_2O_3$   $[M+H]^+$ : 343.20162; found: 343.20213.

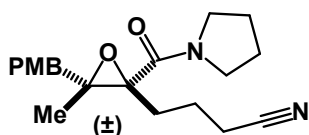

***rac*-4-((*2S,3S*)-3-(4-Methoxybenzyl)-3-methyl-2-(pyrrolidine-1-carbonyl)oxiran-2-yl)butanenitrile (*cis*-**3r**):** The product was synthesized using general procedure D from *trans*-**1r** (15.1 mg, 0.042 mmol, 1 equiv.) with *KOt*Bu (2.4 equiv.) and TsCl (1.4 equiv.)

in THF/DMF (0.4 mL) and obtained as a clear oil (8.2 mg, 57% yield, dr > 20:1).  $^1H$  NMR (500 MHz,  $CDCl_3$ , two conformers reported as one species)  $\delta$ : 7.20 (d,  $J = 8.5$  Hz, 2H), 6.83 (d,  $J = 8.5$  Hz, 2H), 3.79-3.75 (m overlap with s, 4H), 3.61-3.43 (m, 3H), 2.81 (d,  $J = 14.8$  Hz, 1H), 2.56 (d,  $J = 14.8$  Hz, 1H), 2.46-2.41 (m, 2H), 2.22-2.17 (m, 1H), 1.99-1.71 (m, 8H), 1.25-1.21 (overlapping s, 3H).  $^{13}C\{^1H\}$  (126 MHz,  $CDCl_3$ )  $\delta$ : 167.9, 158.5, 130.9, 129.2, 119.3, 113.9, 68.4, 65.5, 55.4, 46.9, 46.4, 41.3, 30.7, 26.6, 23.5, 21.8, 17.4, 17.2. HRMS (DART)  $m/z$  calc'd for  $C_{20}H_{27}N_2O_3$   $[M+H]^+$ : 343.20162; found: 343.20182.

***rac*-4-((*2S,3R*)-3-Allyl-3-methyl-2-(pyrrolidine-1-carbonyl)oxiran-2-yl)butanenitrile**

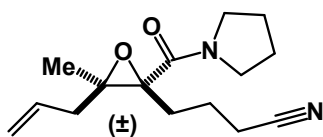

**(*trans*-**3s**):** The product was synthesized using general procedure D from *cis*-**1s** (42.1 mg, 0.15 mmol, 1 equiv.) with *KOt*Bu (2.4 equiv.) and TsCl (1.4 equiv.) in THF/DMF (1.5 mL) and obtained as a clear oil (27.8 mg, 71% yield, > dr 20:1).  $^1H$  NMR (500 MHz,  $CDCl_3$ )  $\delta$ :

5.83-5.75 (m, 1H), 5.22-5.14 (m, 2H), 3.71-3.66 (m, 1H), 3.53-3.35 (m, 3H), 2.56-2.17 (m, 5H), 1.95-1.67 (m, 7H), 1.21 (s, 3H).  $^{13}C\{^1H\}$  (126 MHz,  $CDCl_3$ , exists as two rotamers)  $\delta$ : 167.8, 167.8 (minor), 132.5, 132.1 (minor), 119.6 (minor), 119.4 (minor), 119.2, 118.6, 68.7, 67.6 (minor), 64.3, 63.7 (minor), 46.8, 46.5 (minor), 46.3, 45.7 (minor), 38.8 (minor), 38.2, 30.1, 27.5 (minor), 26.5, 26.5 (minor), 23.8 (minor), 23.5, 21.8, 21.7 (minor), 19.8, 18.7 (minor), 17.3, 16.9 (minor). HRMS (DART)  $m/z$  calc'd for  $C_{15}H_{23}N_2O_2$   $[M+H]^+$ : 263.17540; found: 263.17611.

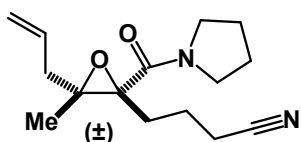

***rac*-4-((*2S,3S*)-3-Allyl-3-methyl-2-(pyrrolidine-1-**

**carbonyl)oxiran-2-yl)butanenitrile (*cis*-**3s**):** The product was synthesized using general procedure D from *trans*-**1s** (25.0 mg, 0.089 mmol, 1 equiv.) with *KOt*Bu (2.4 equiv.) and TsCl (1.4 equiv.)

in THF/DMF (0.9 mL) and obtained as a clear oil (16.9 mg, 72% yield, dr 20:1).  $^1H$  NMR (500 MHz,  $CDCl_3$ , two conformers reported as one species)  $\delta$ : 5.90-5.77 (m, 1H), 5.12-5.06 (m, 2H), 3.74-3.69 (m, 1H), 3.53-3.36 (m, 3H), 2.53-2.41 (m, 2H), 2.24-2.09 (m, 3H), 1.95-1.69



(m, 7H), 1.36-1.32 (overlapping s, 3H).  $^{13}\text{C}\{^1\text{H}\}$  (126 MHz,  $\text{CDCl}_3$ )  $\delta$ : 167.7, 133.1, 119.3, 118.7, 68.5, 64.4, 46.7, 46.4, 41.2, 30.5, 26.6, 23.5, 21.8, 17.3, 17.3. HRMS (DART)  $m/z$  calc'd for  $\text{C}_{15}\text{H}_{23}\text{N}_2\text{O}_2$   $[\text{M}+\text{H}]^+$ : 263.27540; found: 263.17569.

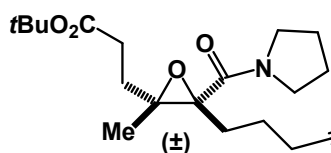

***rac-tert-Butyl 3-((2S,3S)-3-(3-cyanopropyl)-2-methyl-3-(pyrrolidine-1-carbonyl)oxiran-2-yl)propanoate (cis-3t):***

The product was synthesized using general procedure D from ***trans-1t*** (27.6 mg, 0.075 mmol, 1 equiv.) with  $\text{KO}t\text{Bu}$  (2.4 equiv.) and  $\text{TsCl}$  (1.4 equiv.) in THF (0.75 mL) and obtained as a clear oil (6.1 mg, 23% yield, dr > 20:1).  $^1\text{H}$  NMR (500 MHz,  $\text{CDCl}_3$ )  $\delta$ : 3.75-3.72 (m, 1H), 3.55-3.35 (m, 3H), 2.50-2.38 (m, 3H), 2.32-2.26 (m, 1H), 2.17-2.12 (m, 1H), 1.95-1.69 (m, 9H), 1.42 (s, 9H), 1.34 (s, 3H).  $^{13}\text{C}\{^1\text{H}\}$  (126 MHz,  $\text{CDCl}_3$ )  $\delta$ : 172.3, 167.5, 119.3, 80.5, 68.8, 64.3, 46.7, 46.4, 31.7, 31.1, 30.5, 28.2, 26.6, 23.5, 21.8, 17.3, 17.3. HRMS (DART)  $m/z$  calc'd for  $\text{C}_{19}\text{H}_{31}\text{N}_2\text{O}_4$   $[\text{M}+\text{H}]^+$ : 351.22783; found: 351.22761.

**2D NOESY NMR analysis of *trans-* and *cis-*3r**

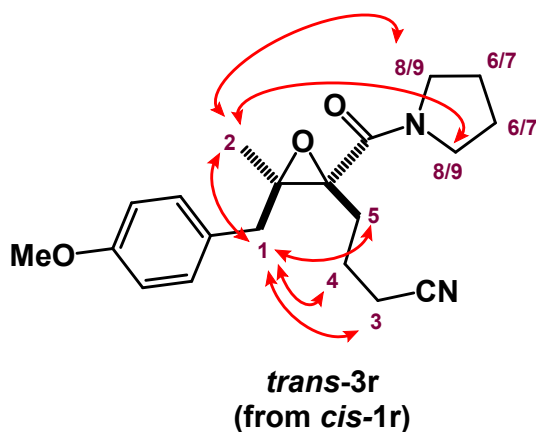

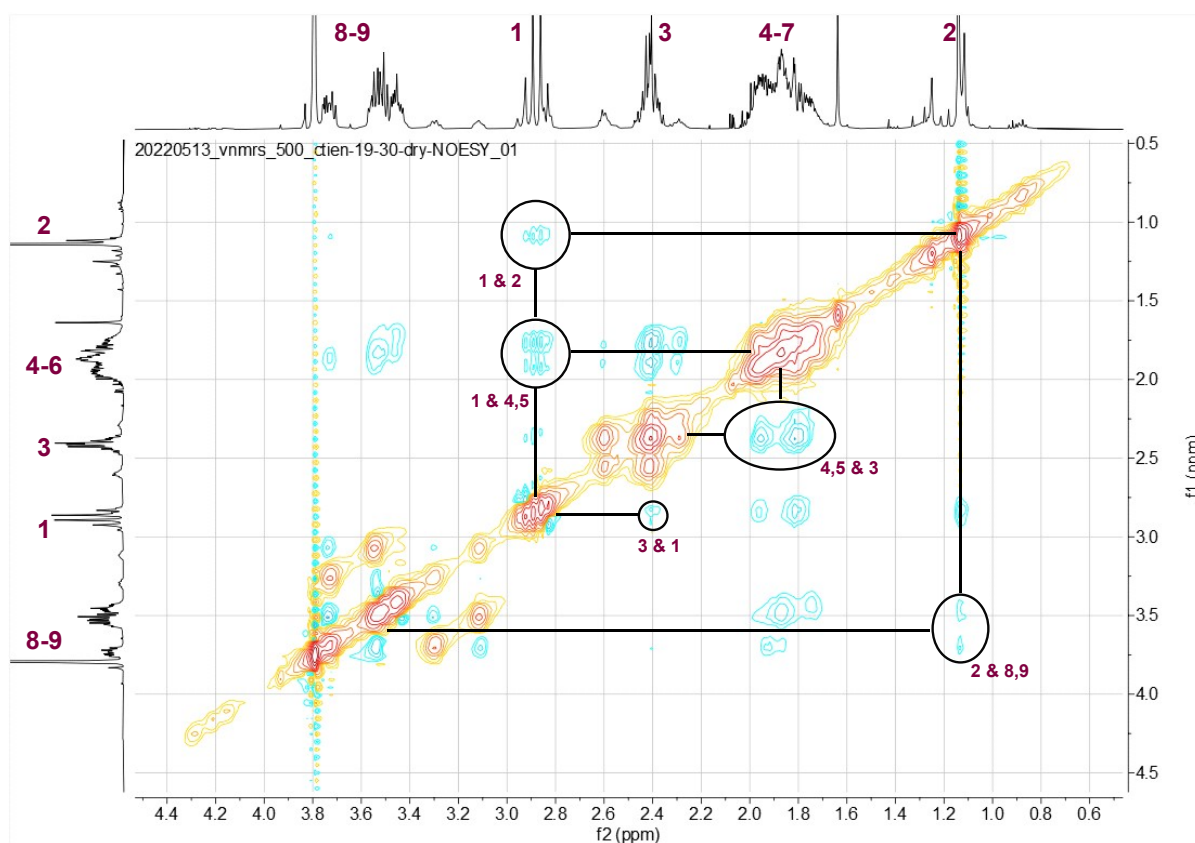

Figure S1. NOESY spectrum of *trans-3r* for diastereomer assignment. Peaks were assigned based on  $^1\text{H}$ ,  $^{13}\text{C}$ , COSY, HSQC and HMBC NMR spectroscopy.

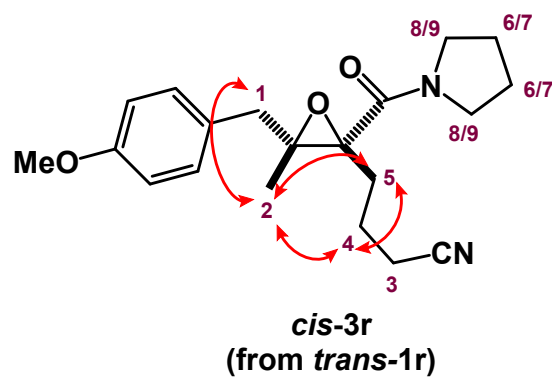

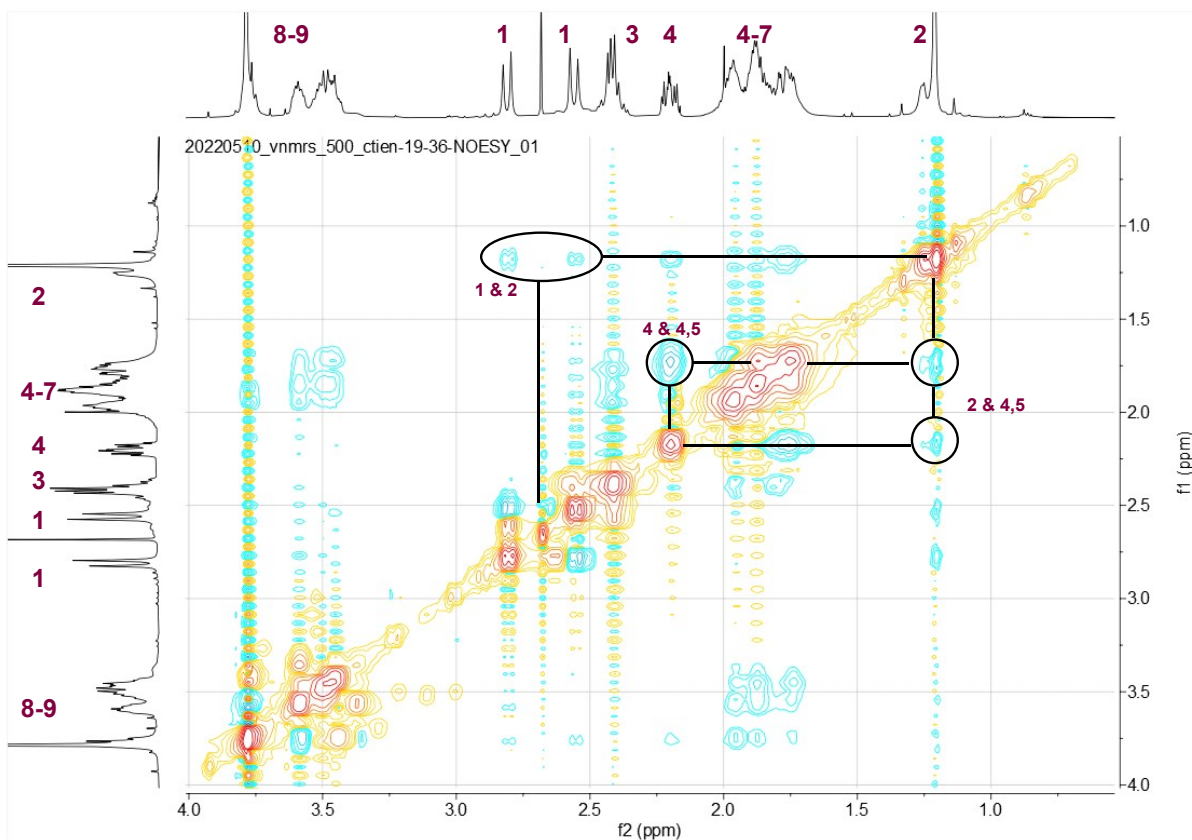

Figure S2. NOESY spectrum of *cis-3r* for diastereomer assignment. Peaks were assigned based on  $^1\text{H}$ ,  $^{13}\text{C}$ , COSY, HSQC and HMBC NMR spectroscopy.

### LCMS and TLC traces of *trans-* and *cis-3r*

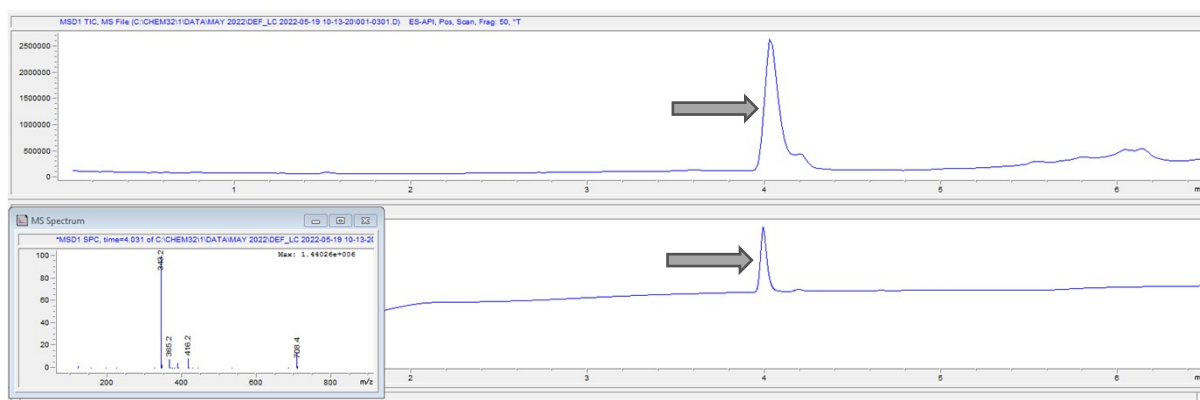

Figure S3. LCMS trace of *trans-3r* with the MS spectrum of the product (4.03 min) shown.

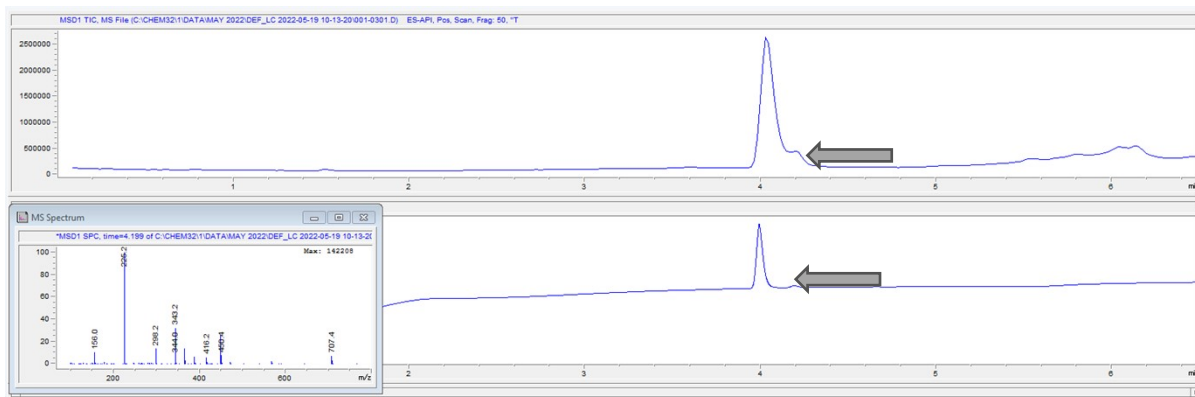

Figure S4. LCMS trace of *trans-3r* with the MS spectrum of the column impurity (4.2 min) shown.

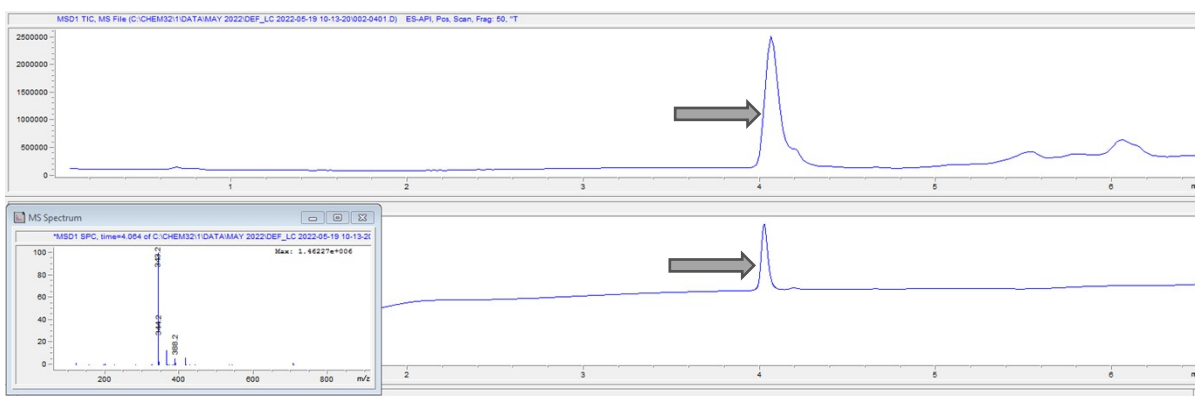

Figure S5. LCMS trace of *cis-3r* with the MS spectrum of the product (4.06 min) shown.

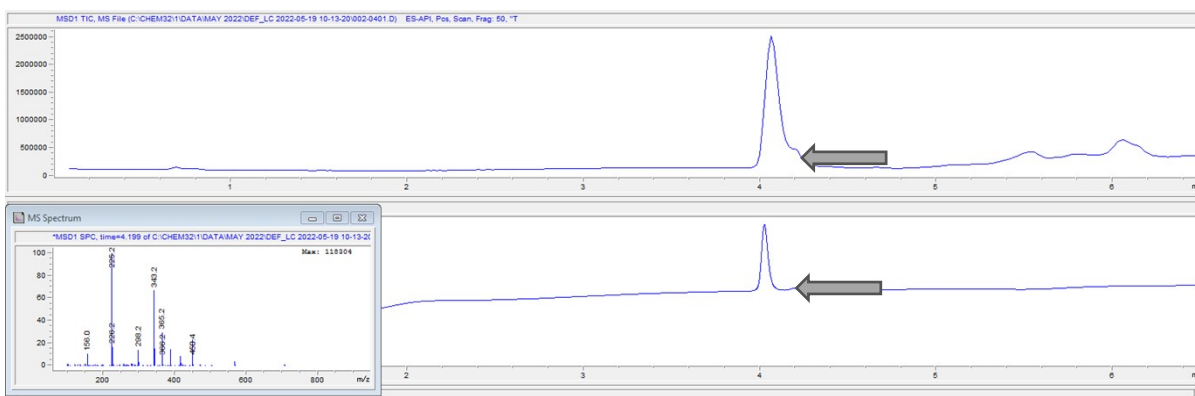

Figure S6. LCMS trace of *cis-3r* with the MS spectrum of the column impurity (4.2 min) shown.

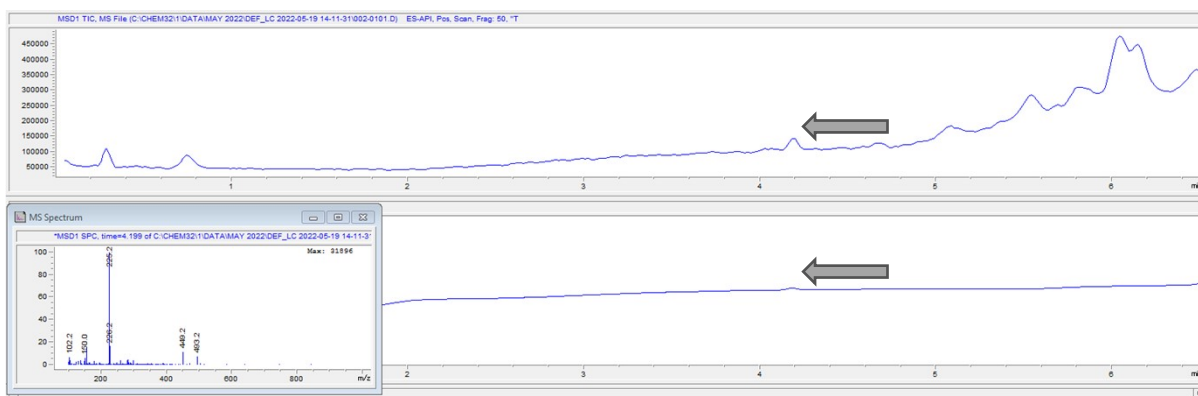

Figure S7. LCMS trace of a blank run with the MS spectrum of the column impurity (4.2 min) shown.

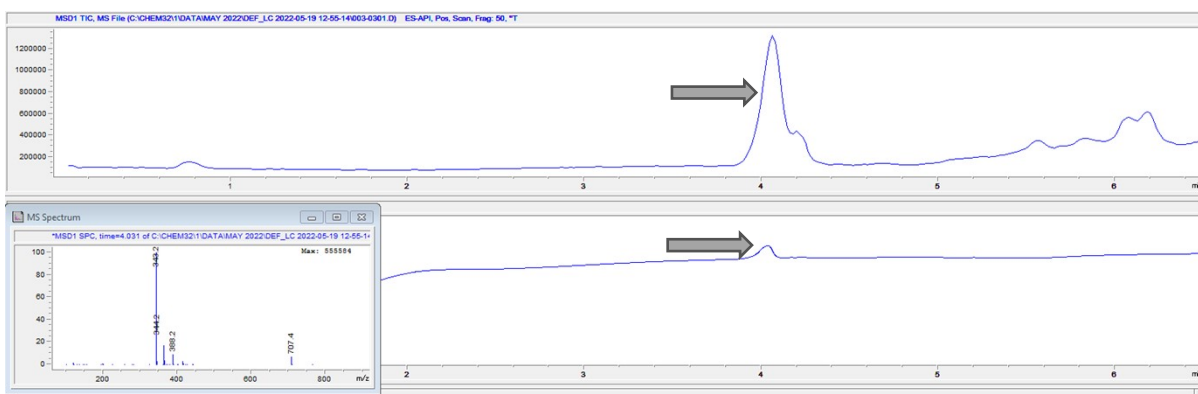

Figure S8. LCMS trace of a mixture of *trans*-**3r** and *cis*-**3r** with the MS spectrum of the two products (4.03 min) shown.

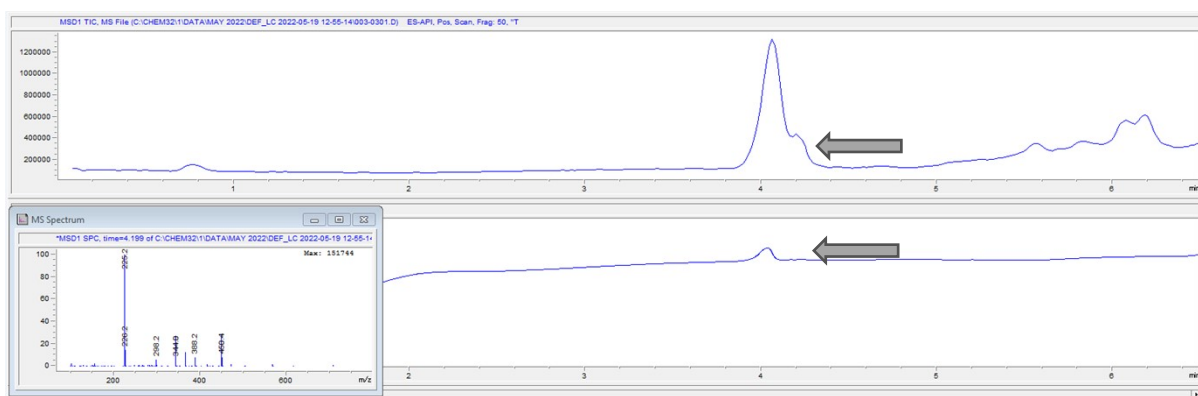

Figure S9. LCMS trace of a mixture of *trans*-**3r** and *cis*-**3r** with the MS spectrum of the column impurity (4.2 min) shown.

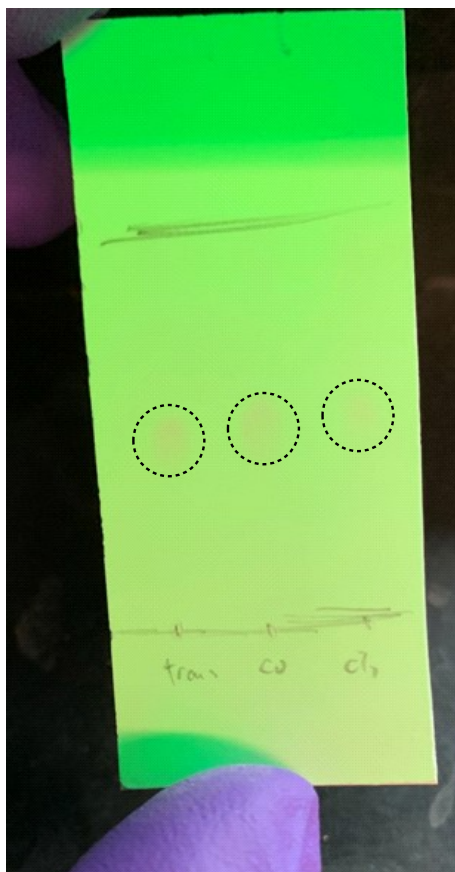

Figure S10. TLC trace of *trans-3r* (left), *cis-3r* (right) and a co-spot (middle) eluted with 100% EtOAc visualized under UV light at 254 nm.

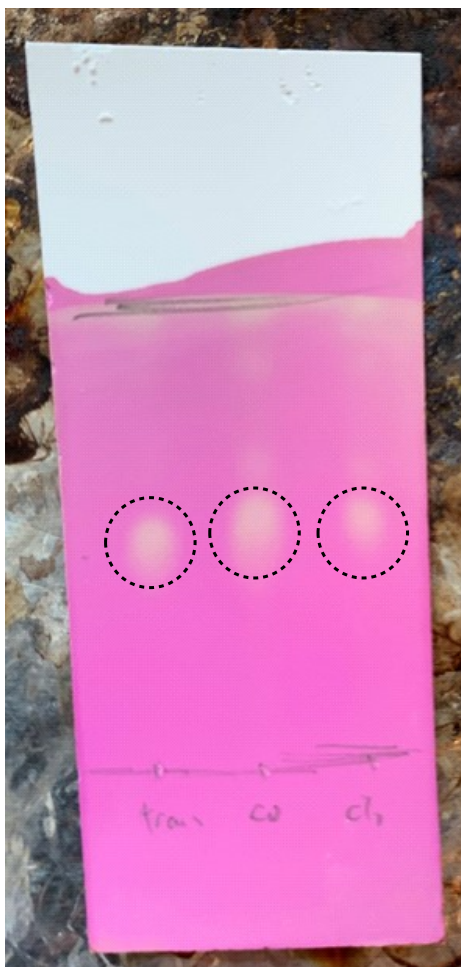

Figure S11. TLC trace of *trans-3r* (left), *cis-3r* (right) and a co-spot (middle) eluted with 100% EtOAc visualized with  $\text{KMnO}_4$  stain.

The RP-LCMS and TLC traces are included to demonstrate that *trans-3r* and *cis-3r* are inseparable by both reversed-phase and normal phase column chromatography. Therefore, purification by column chromatography does not affect the *dr* of the reaction.

# NMR spectra

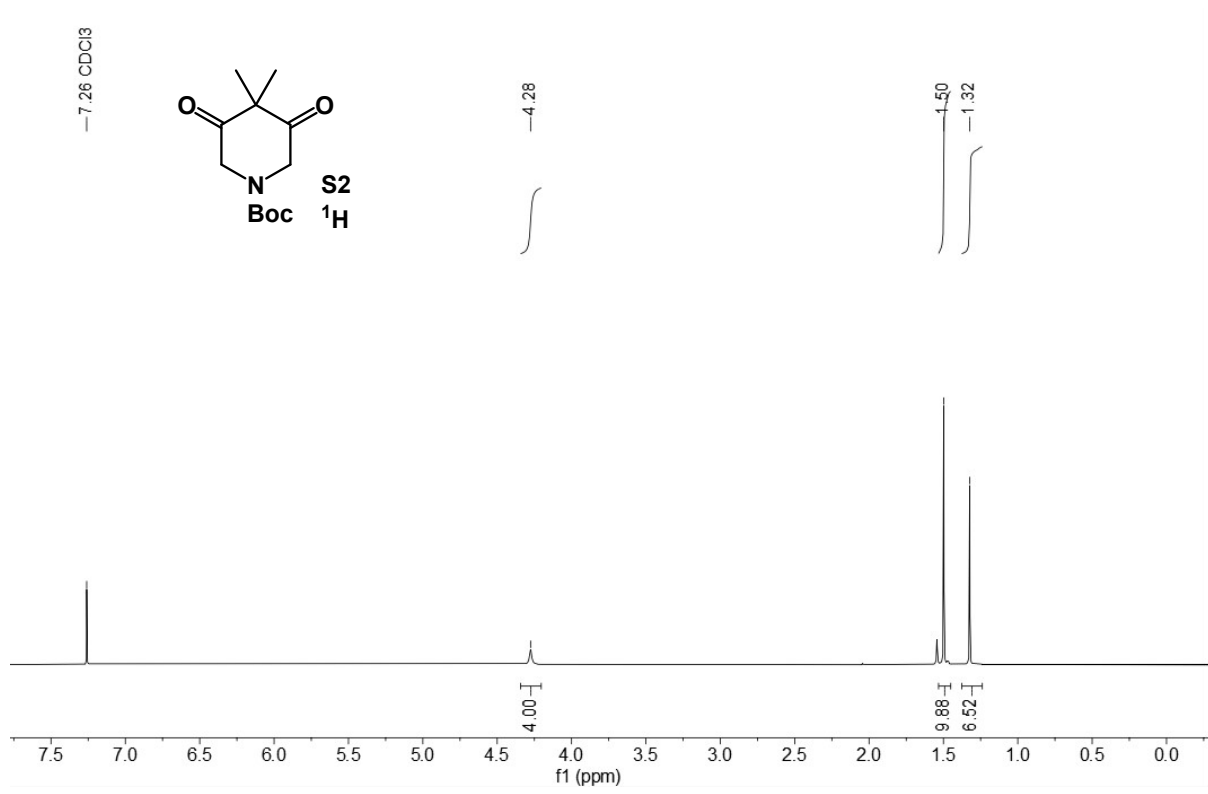



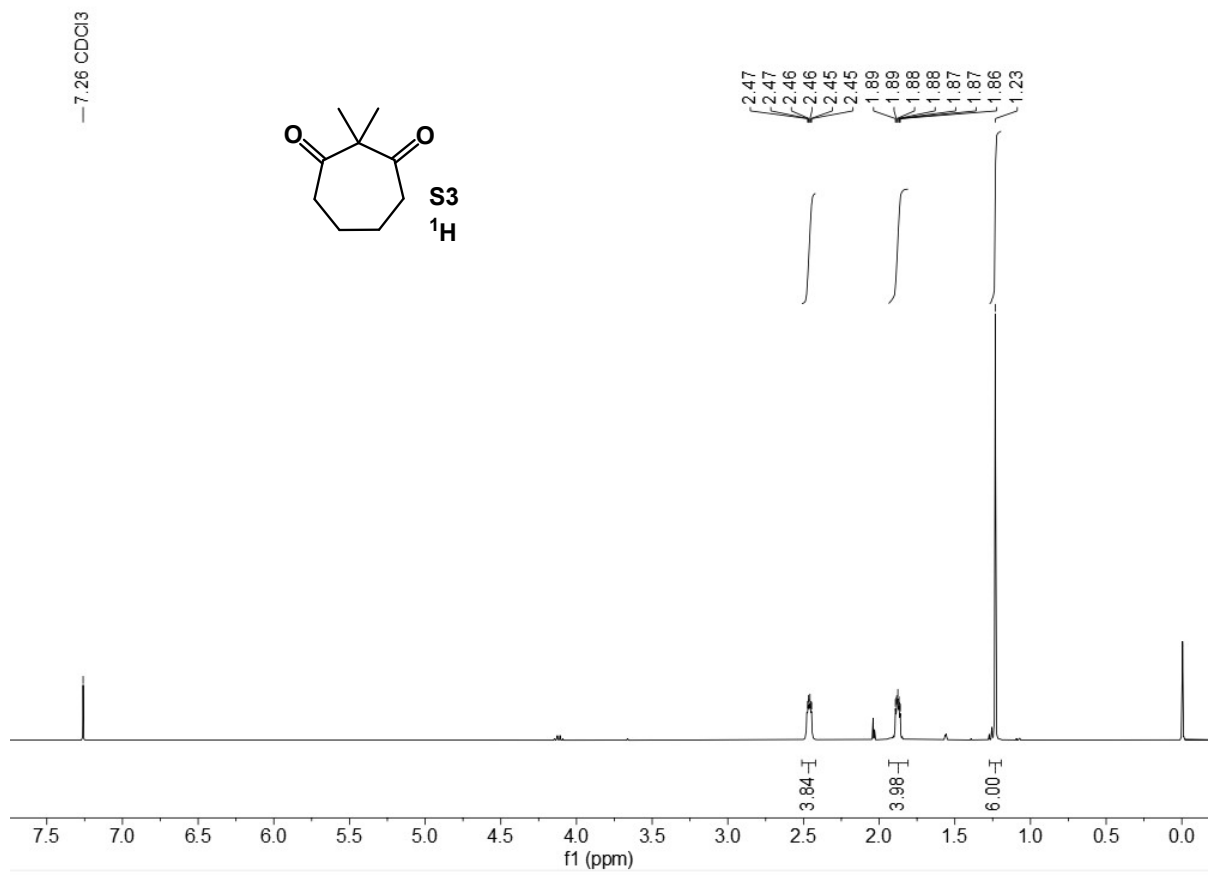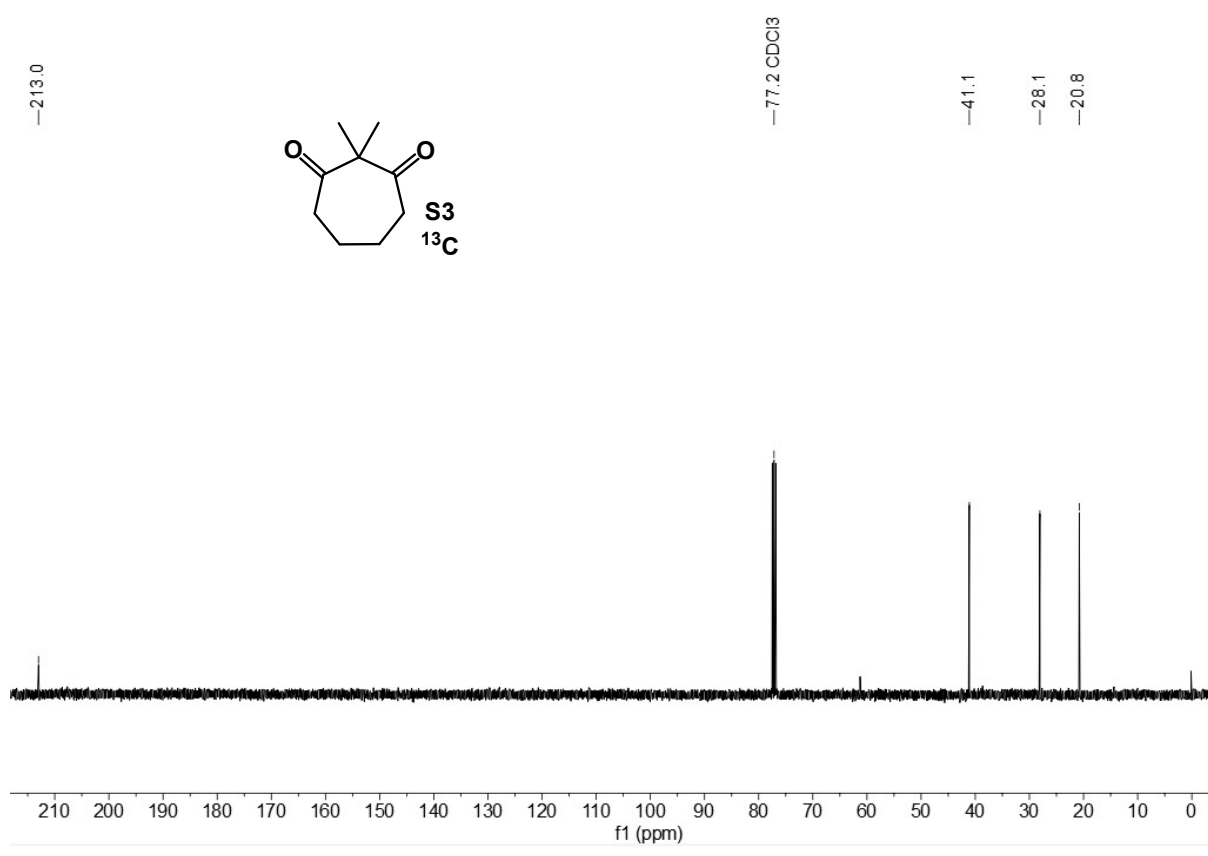

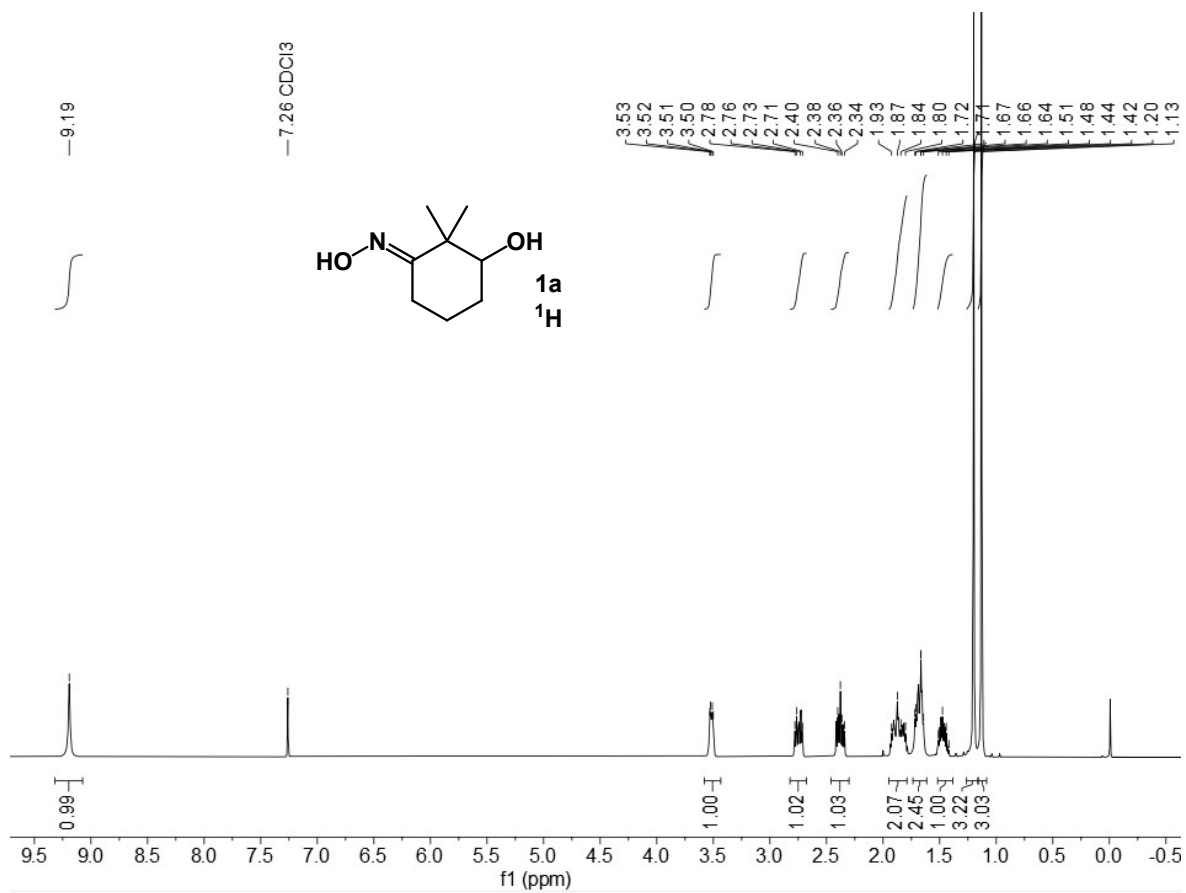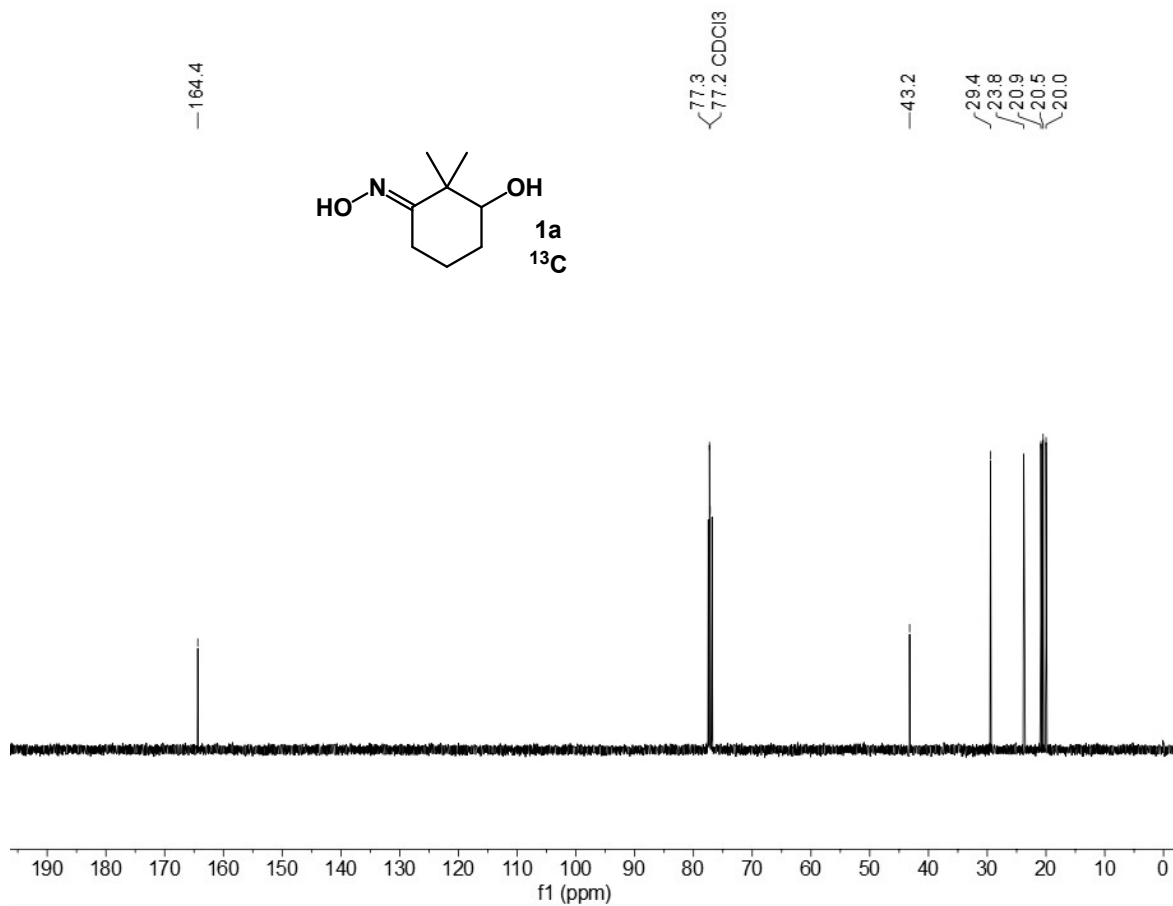

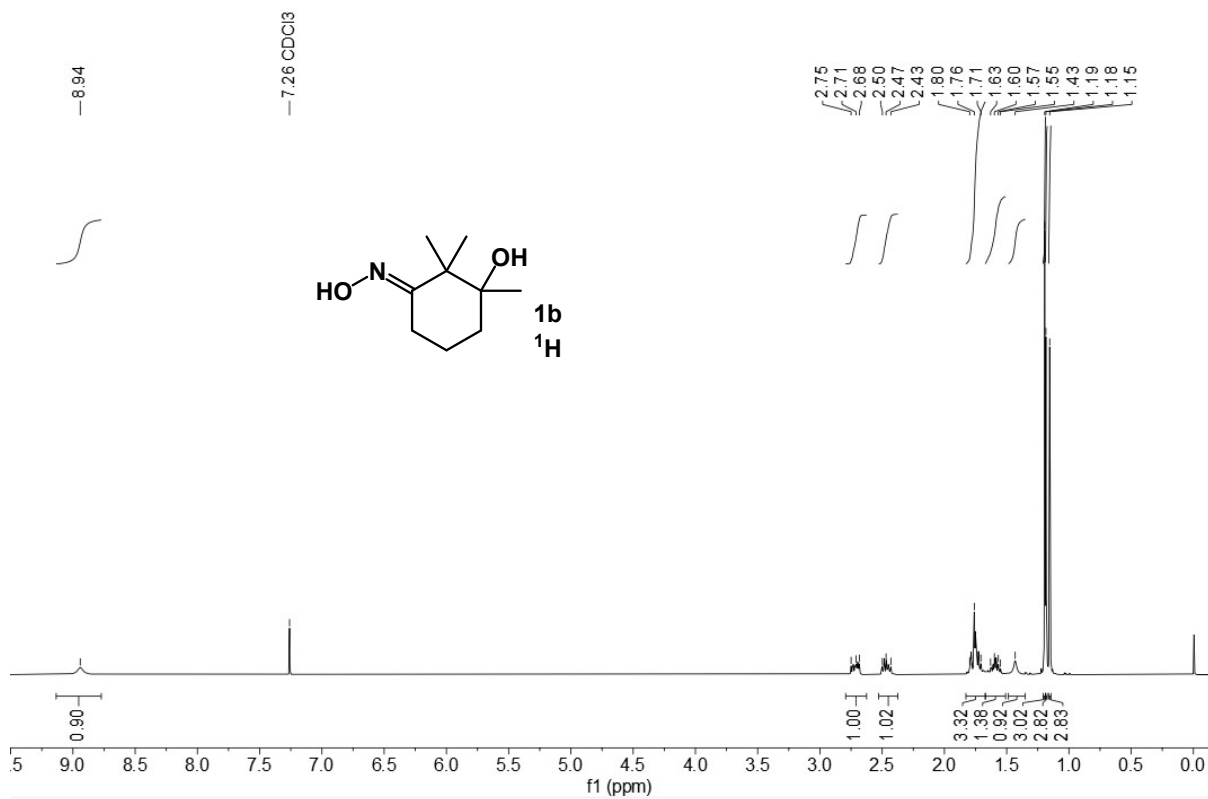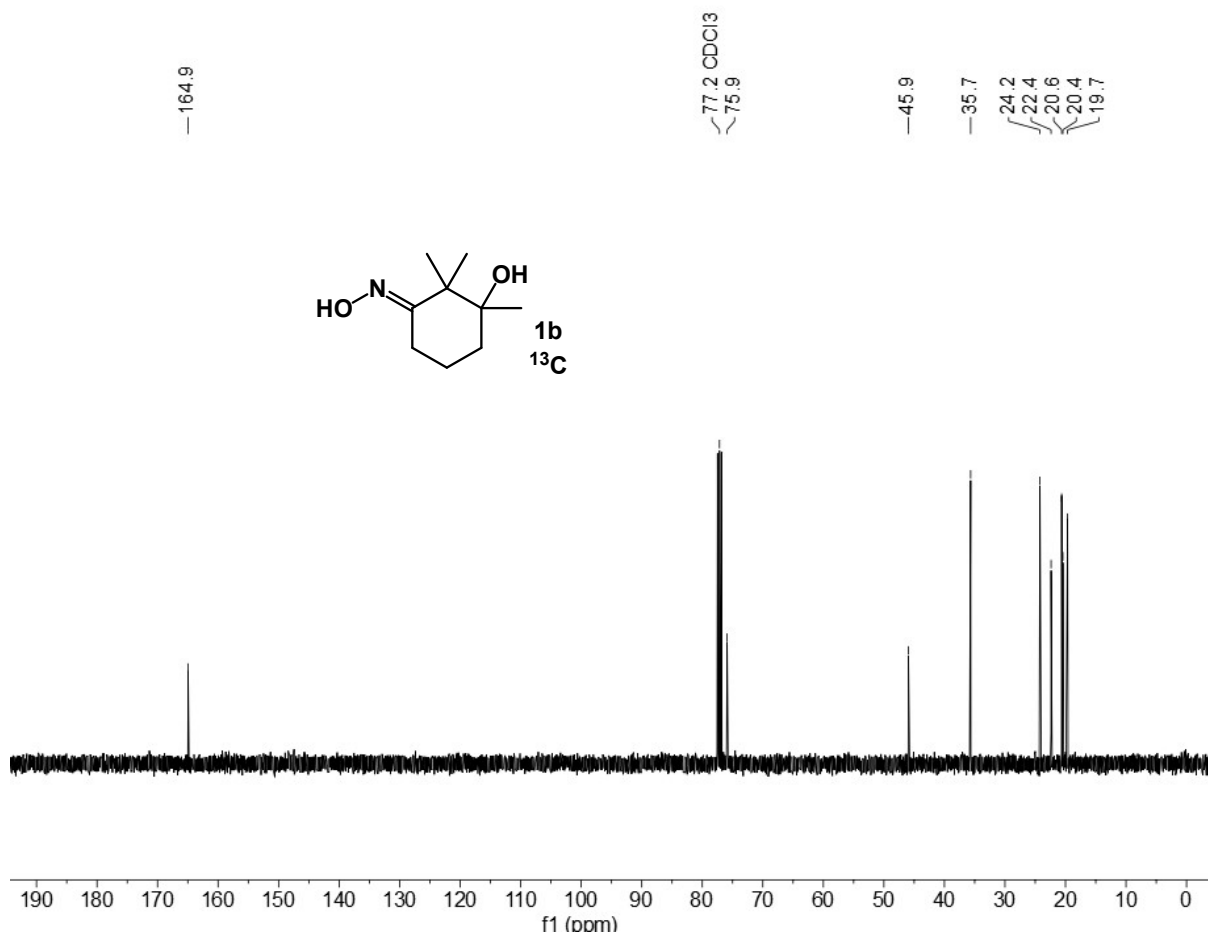

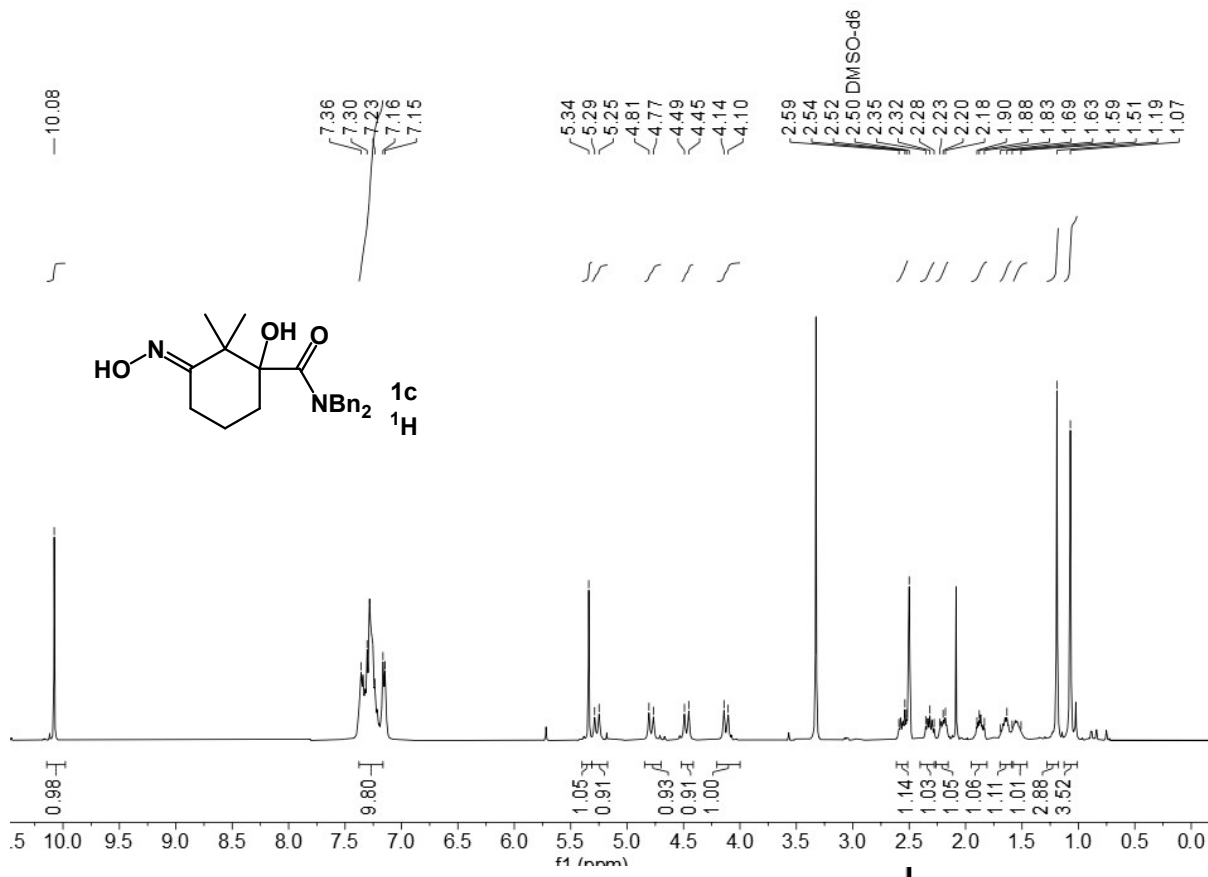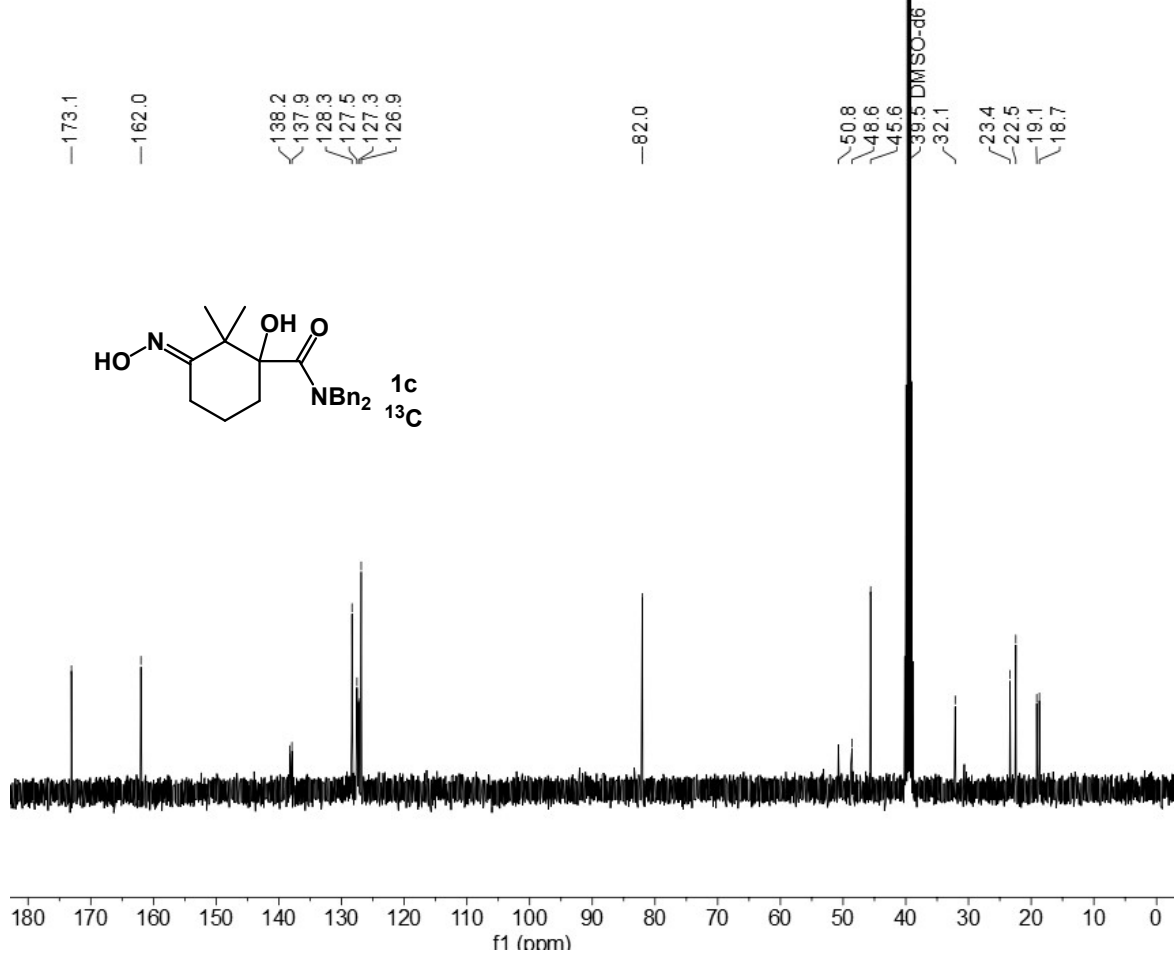

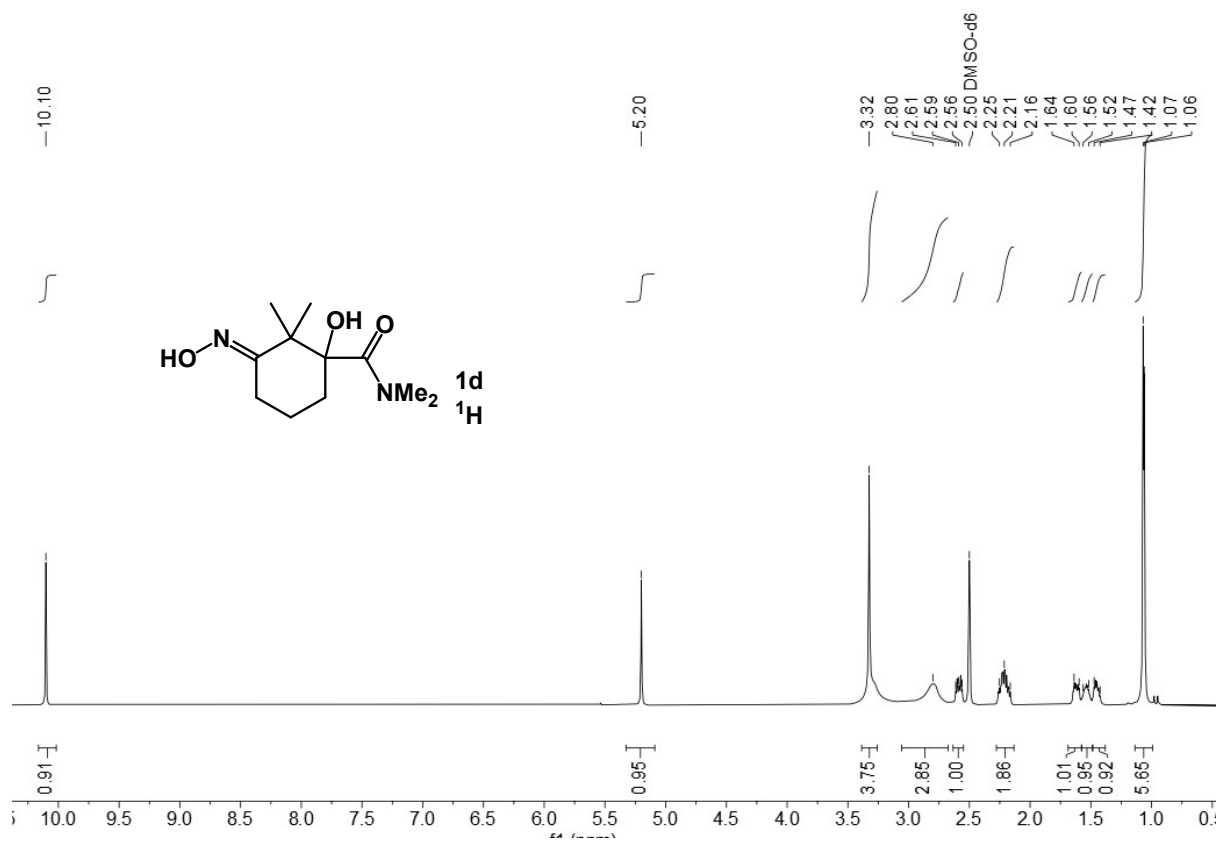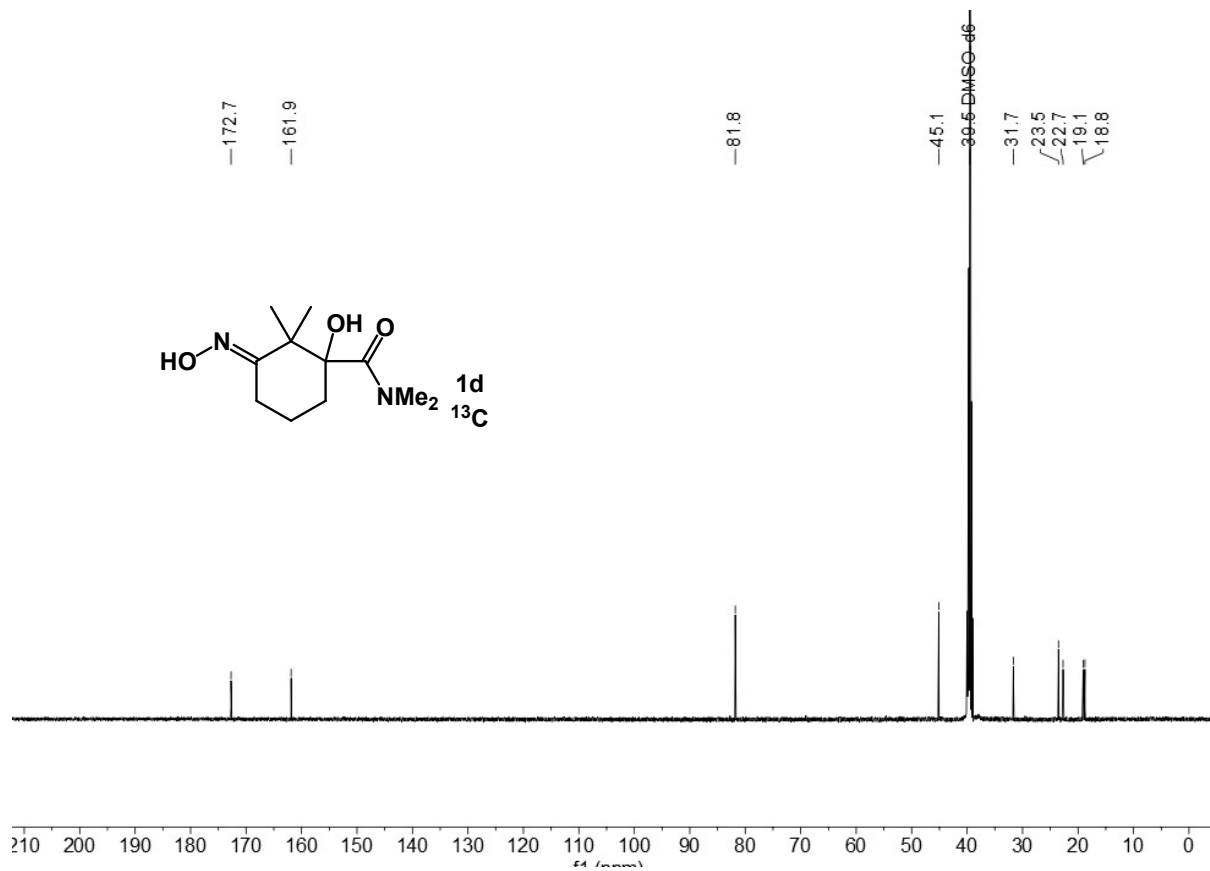

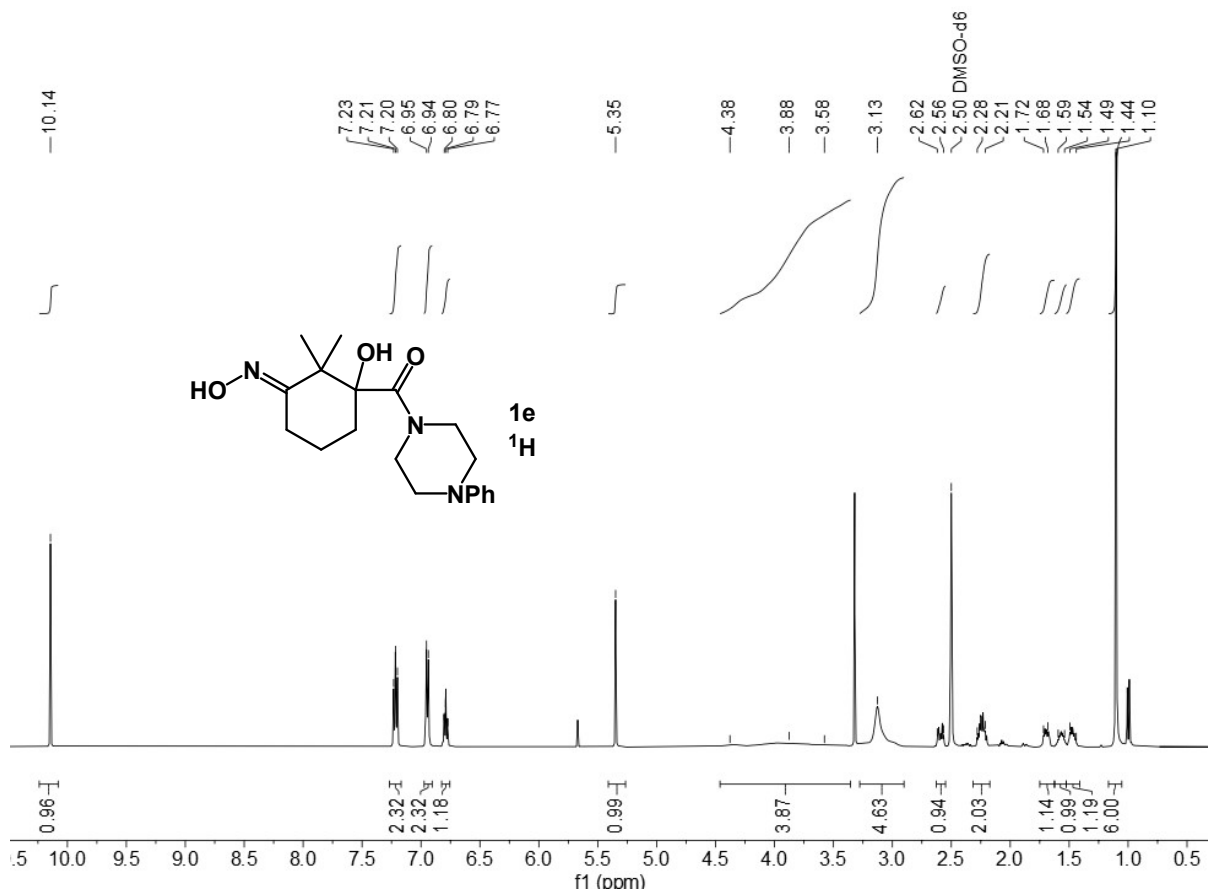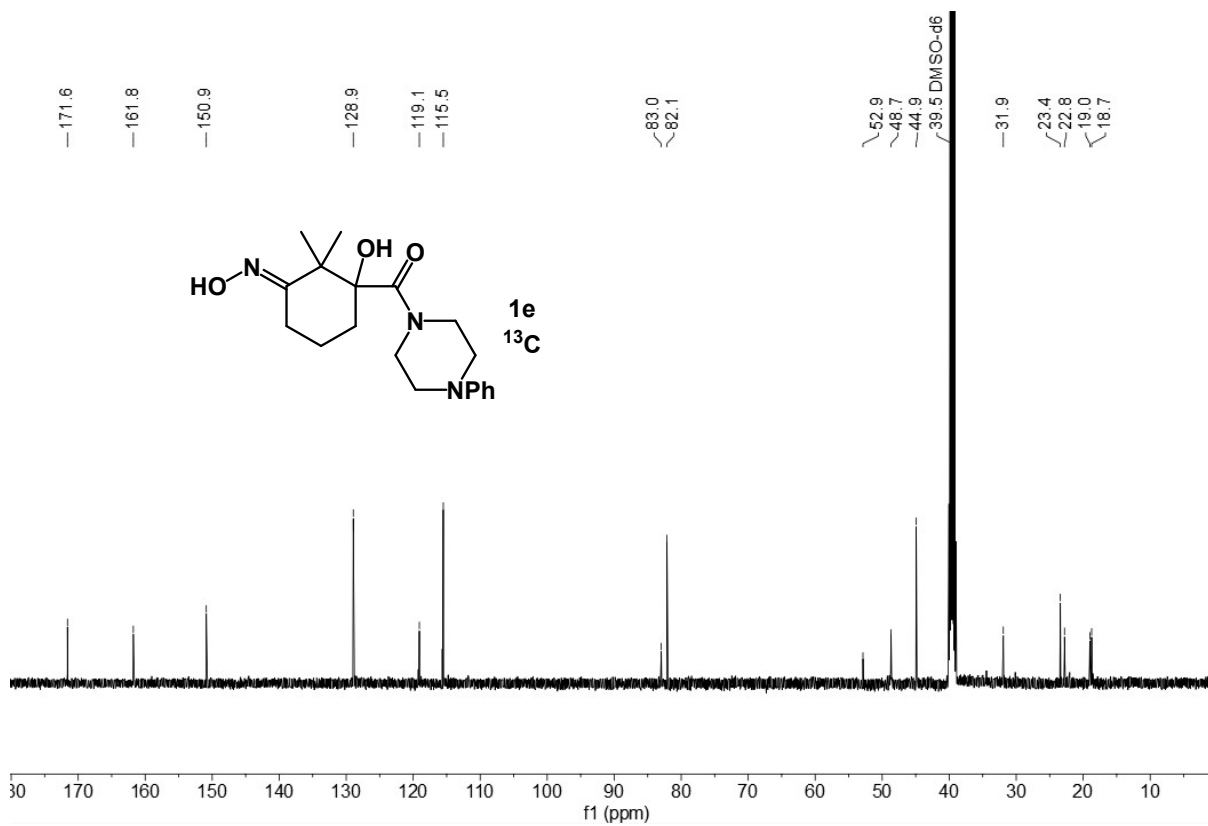

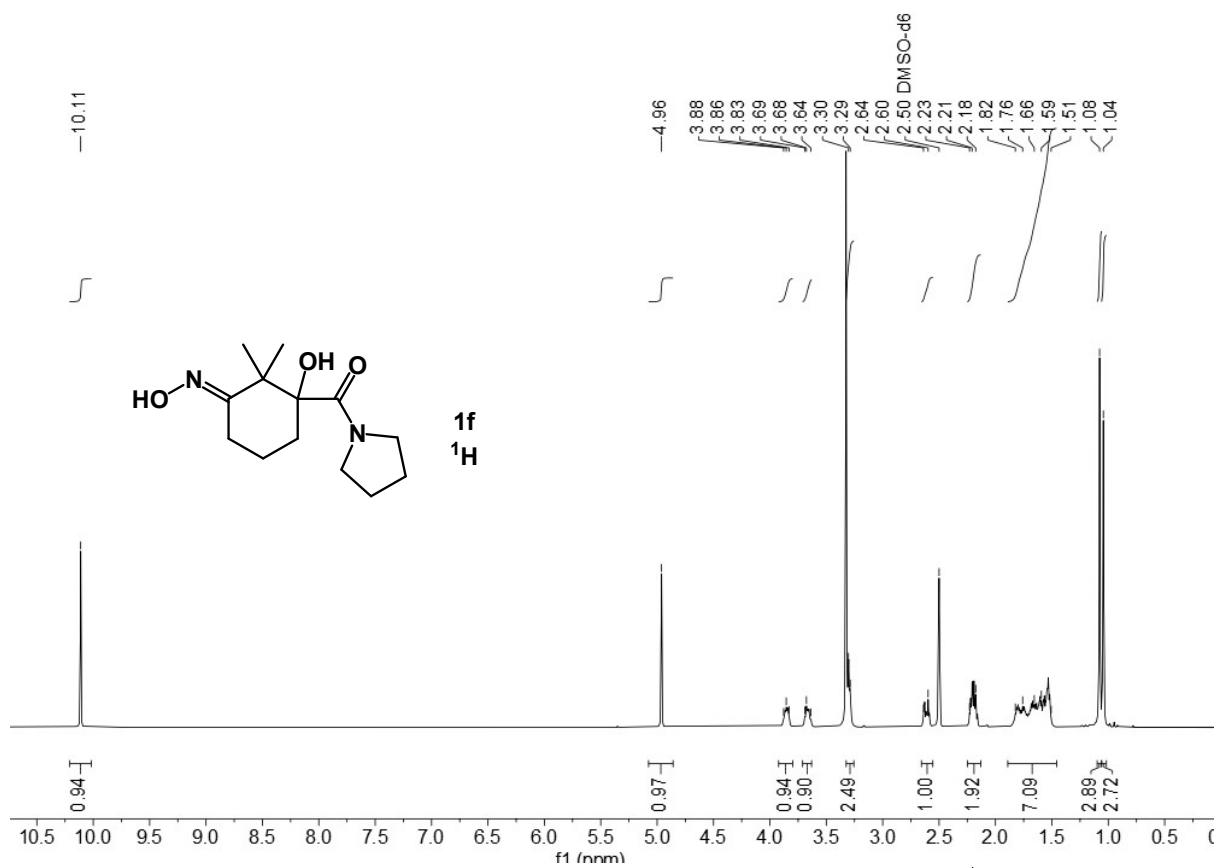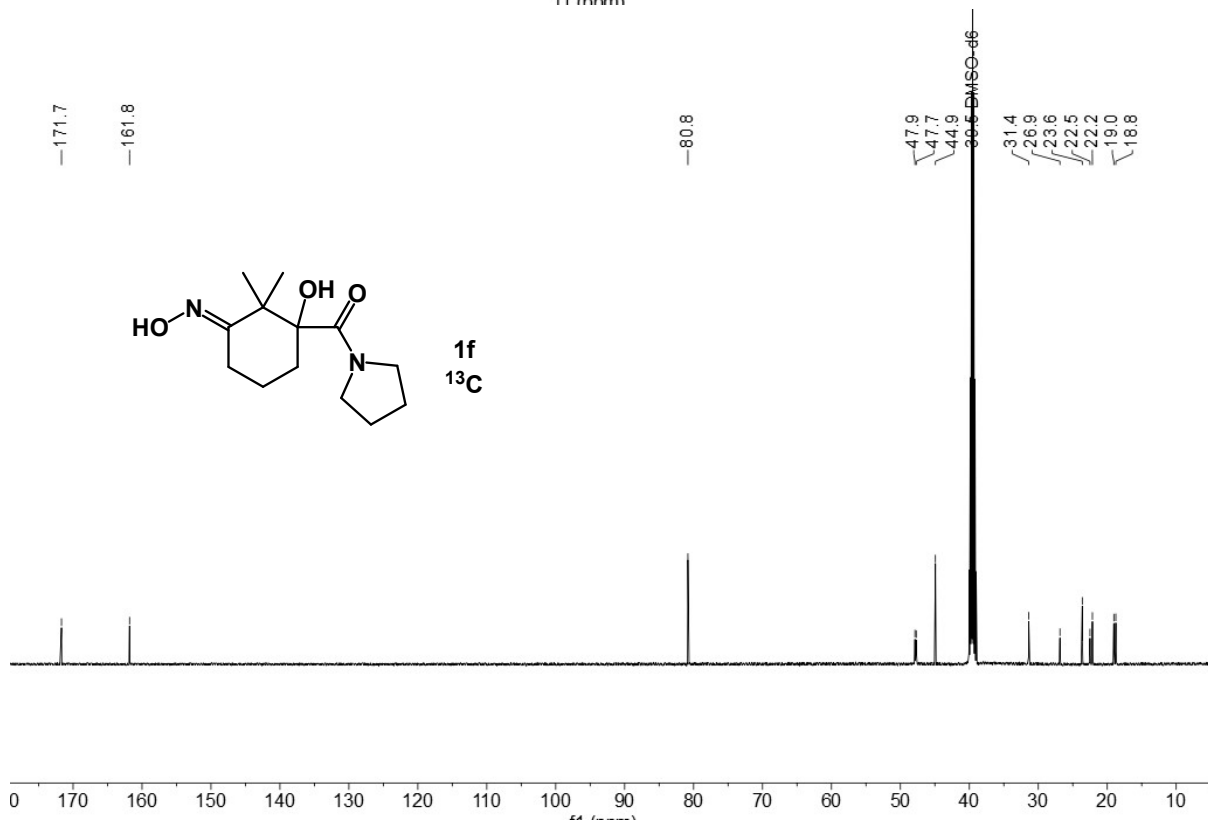

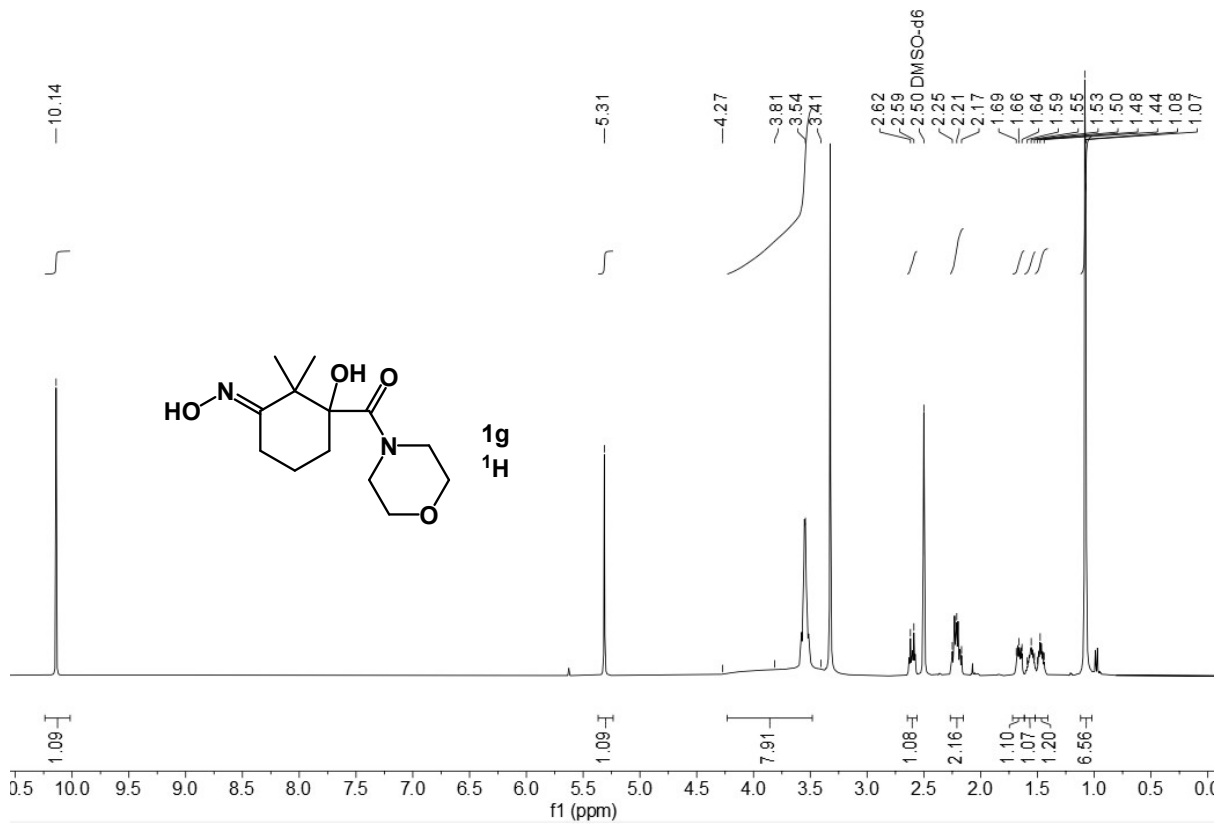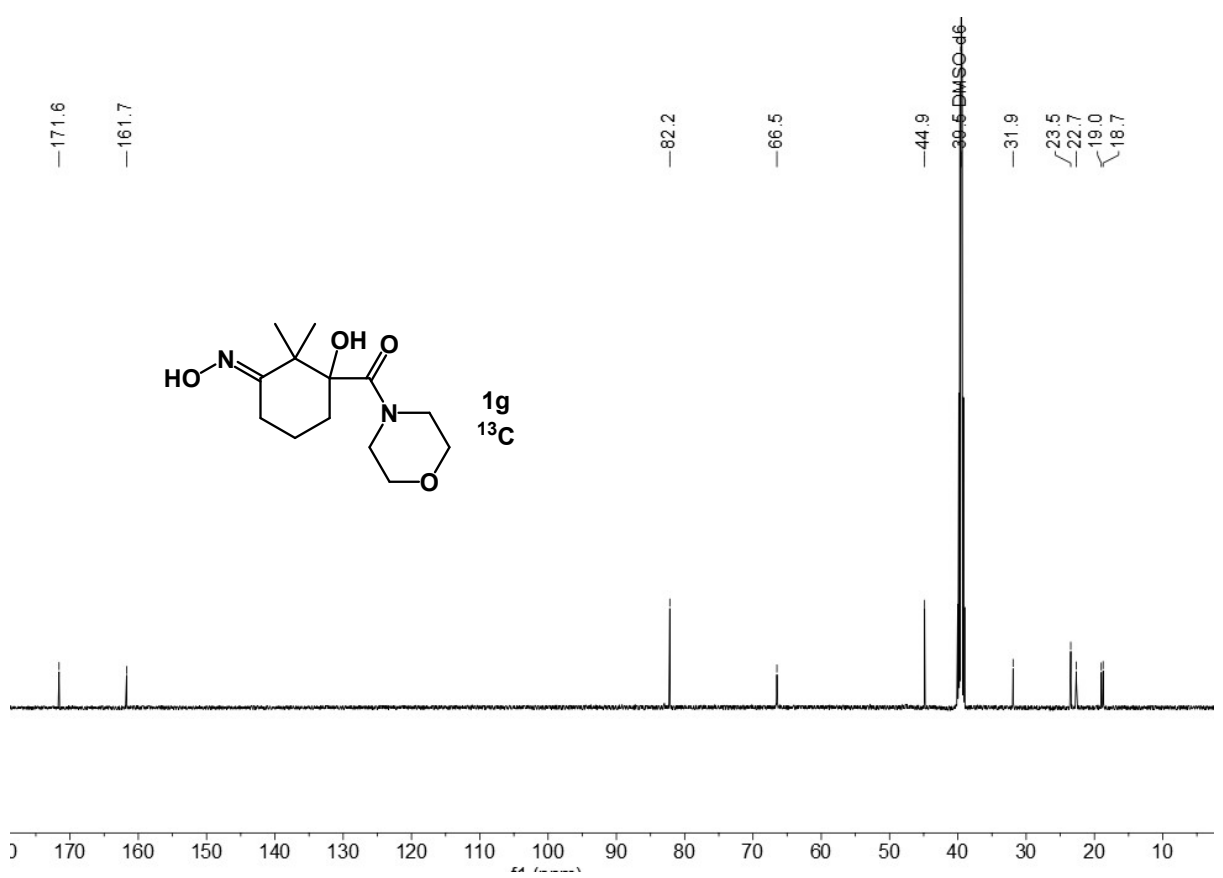



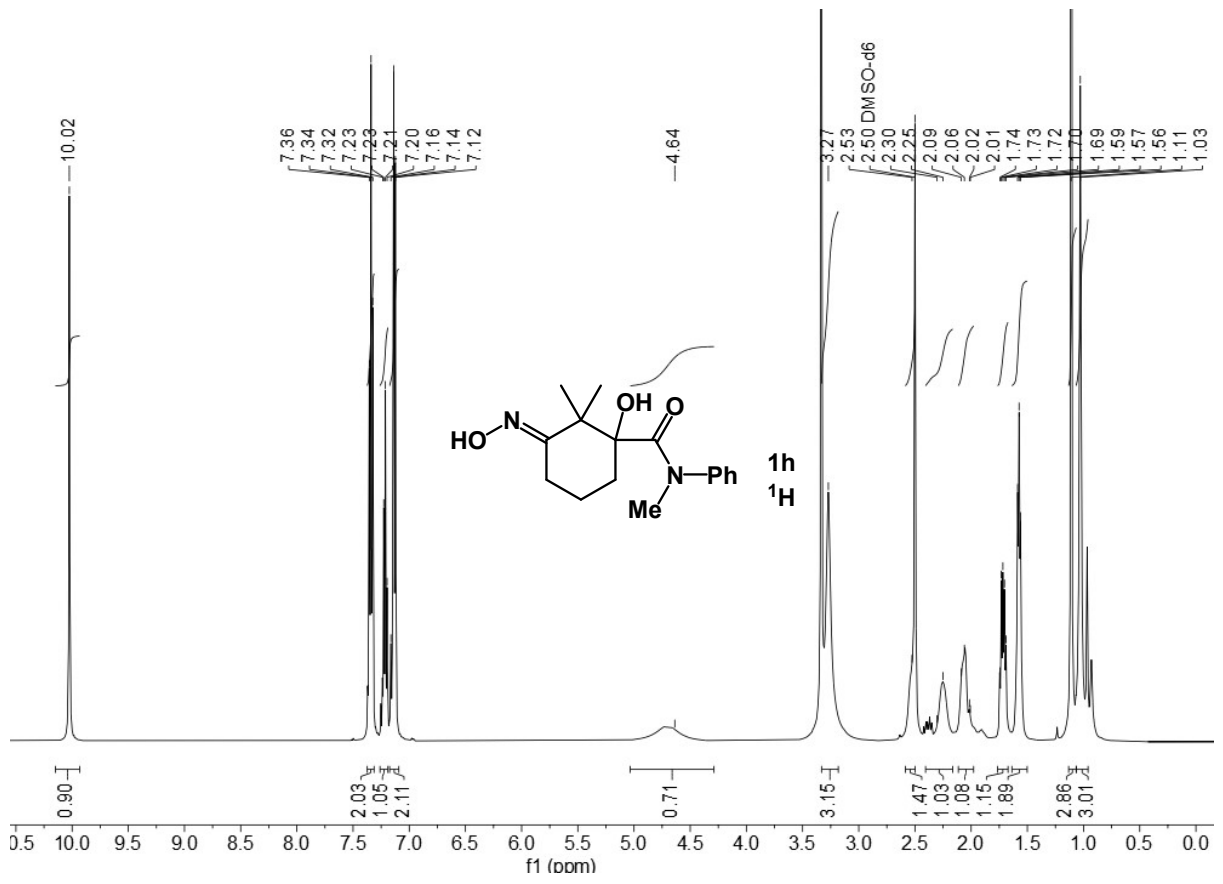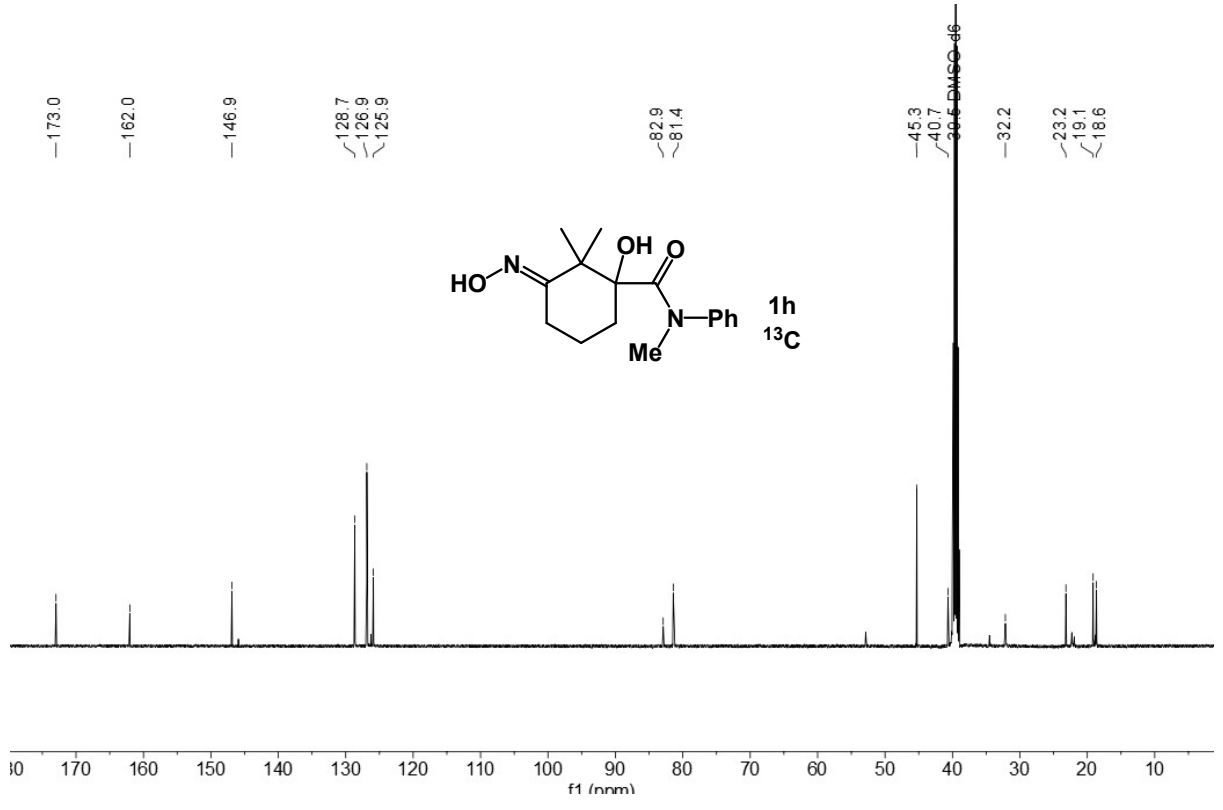

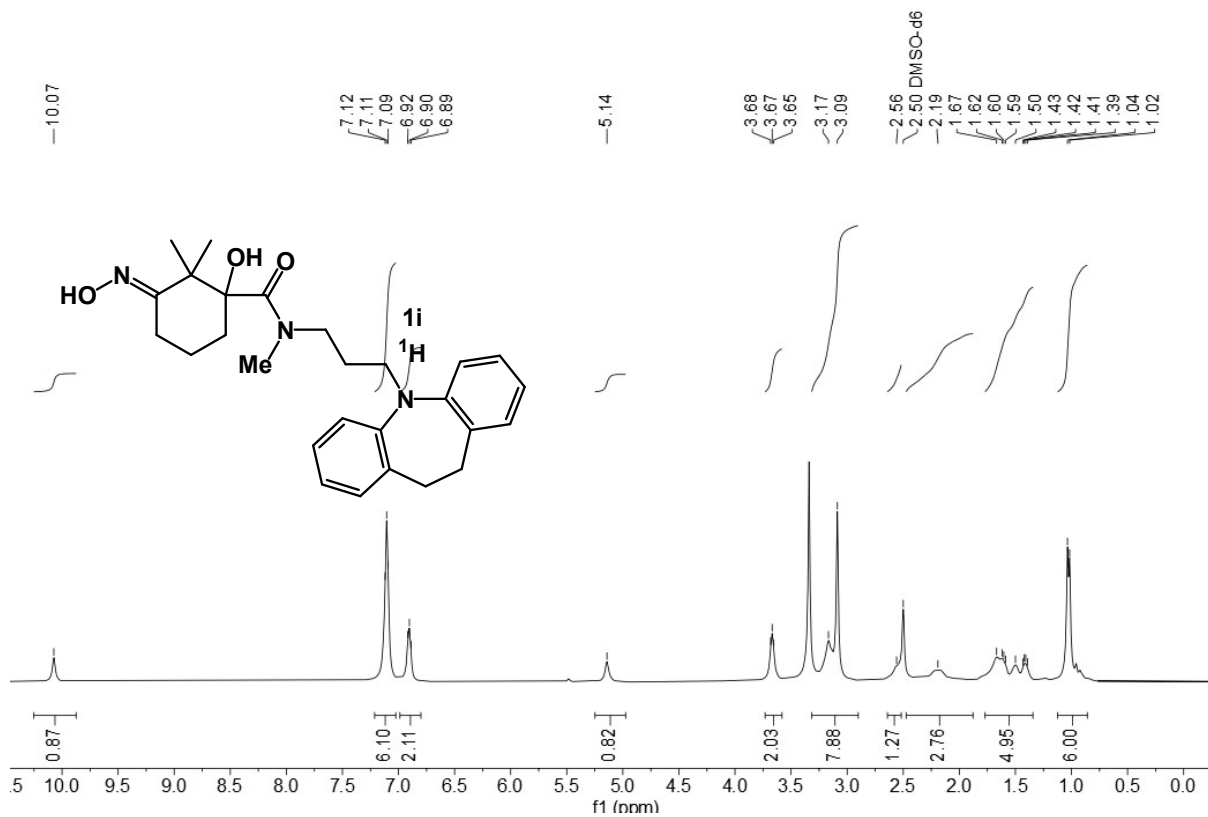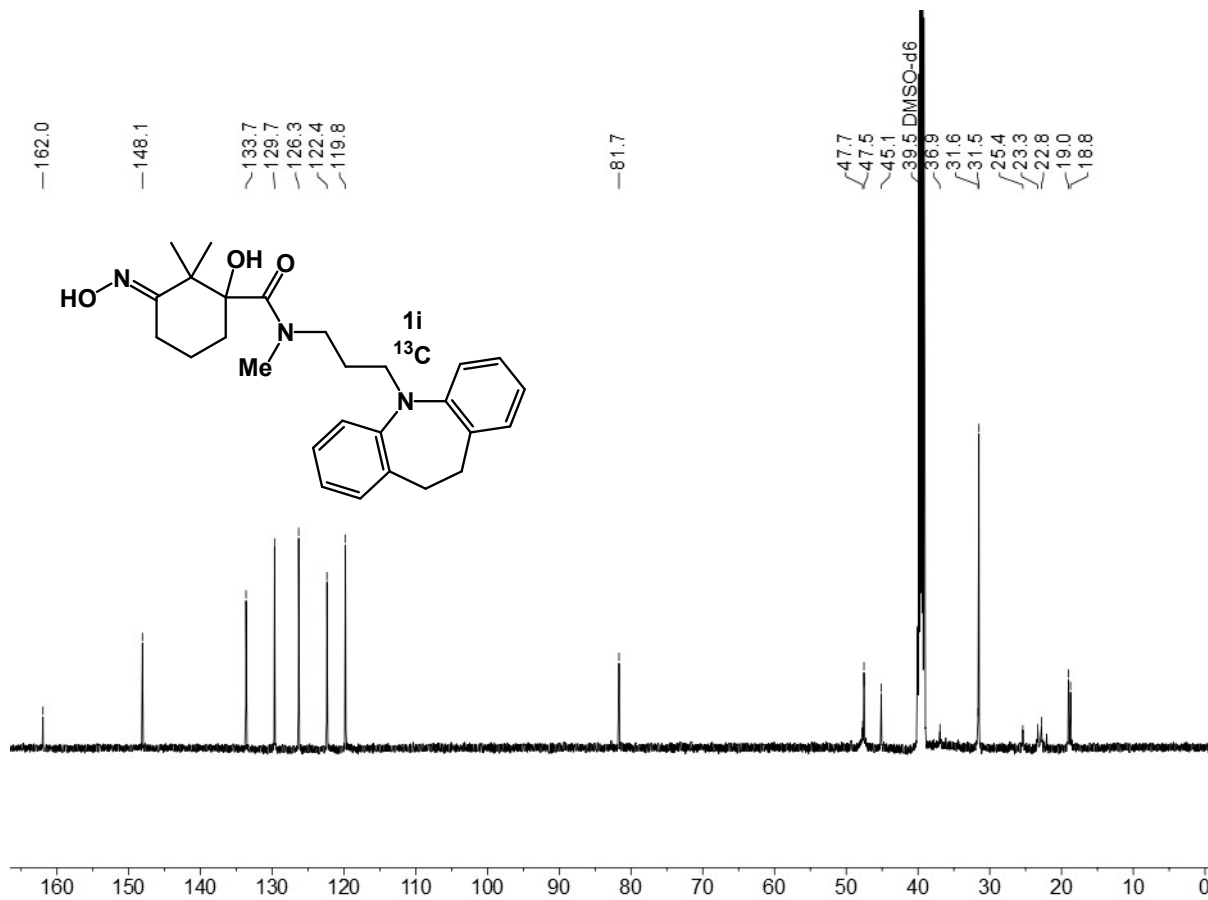

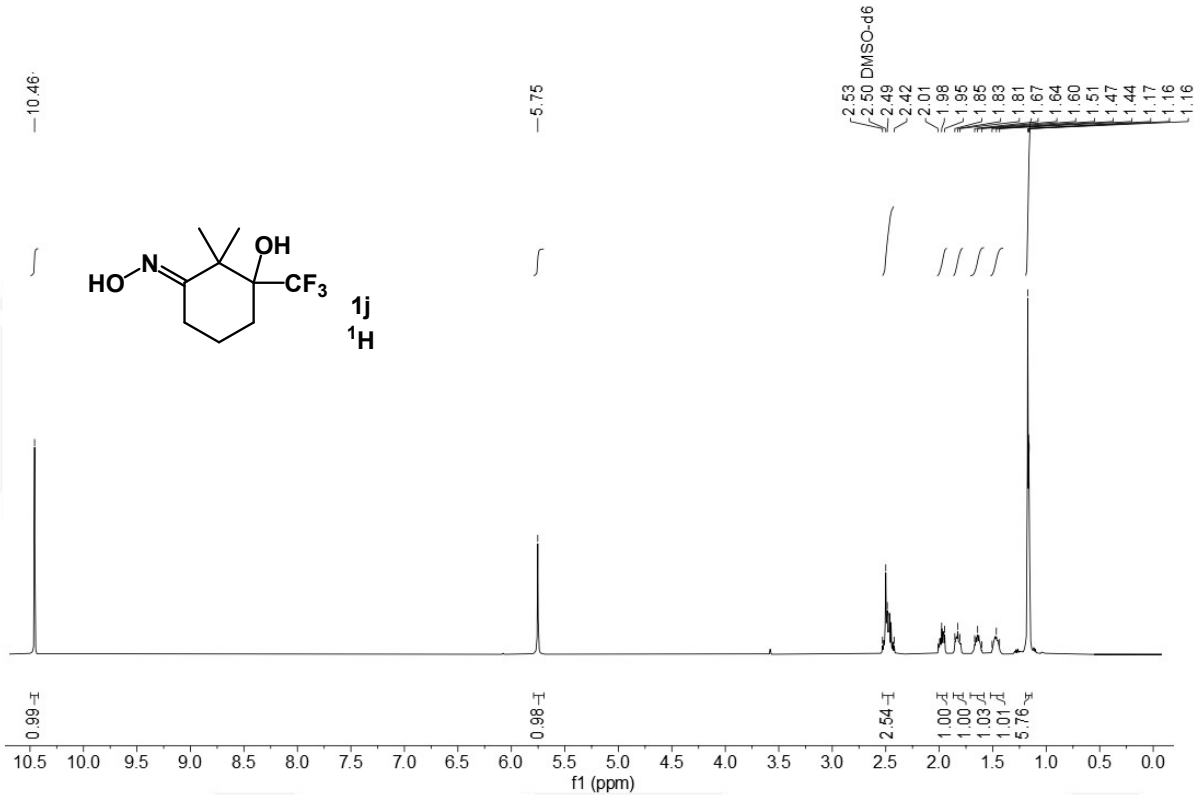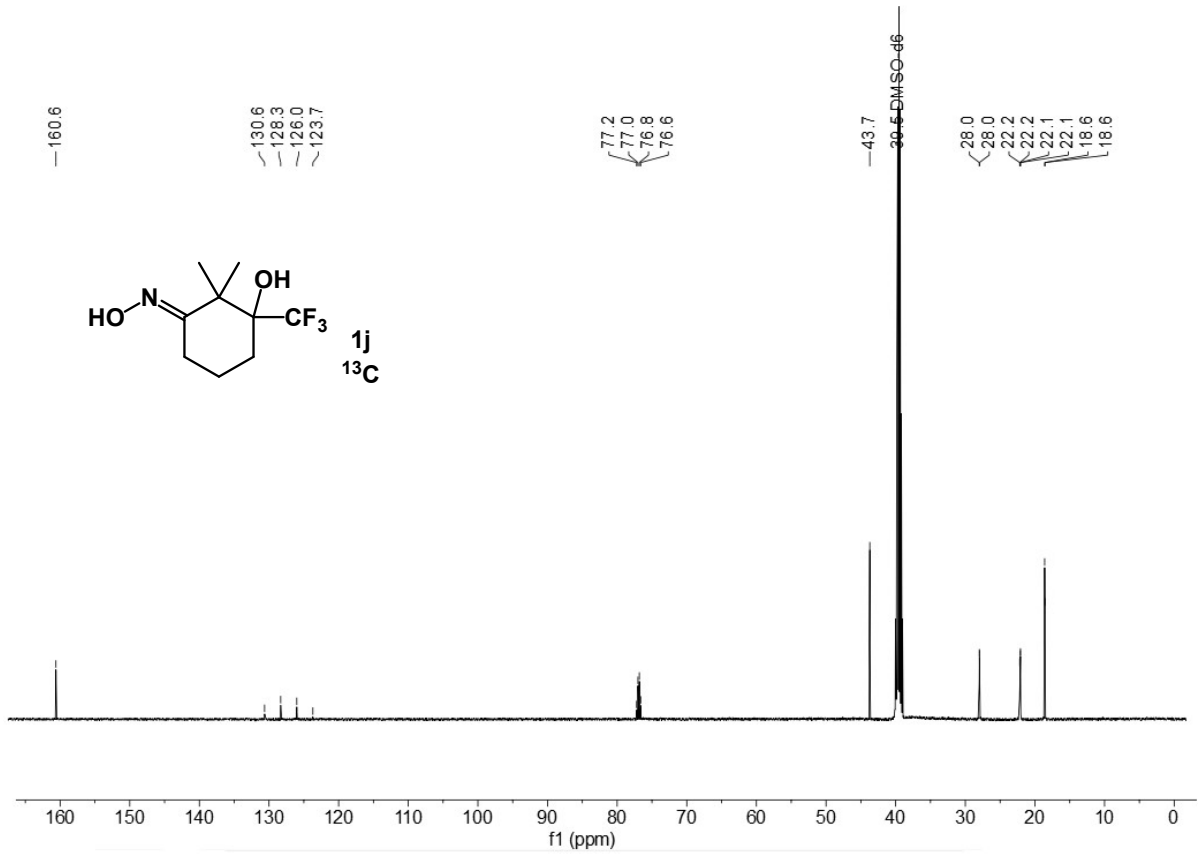

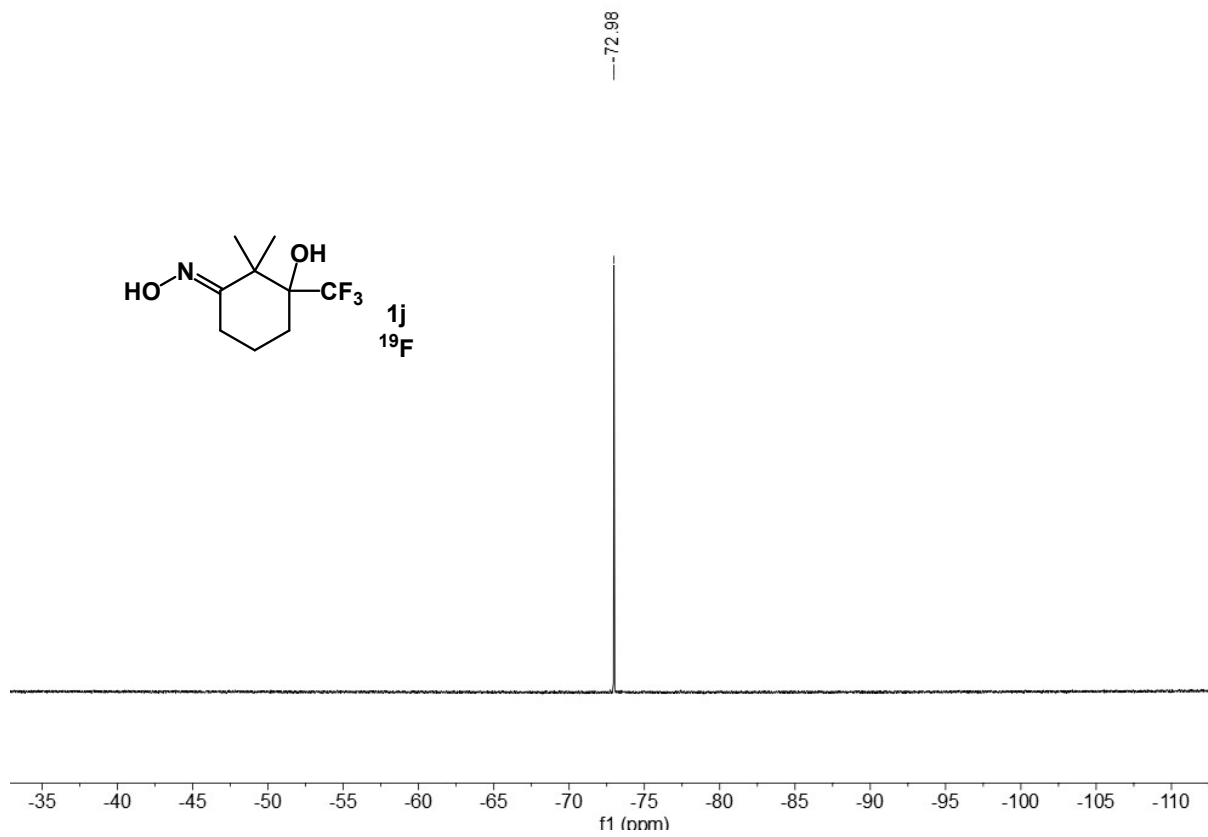

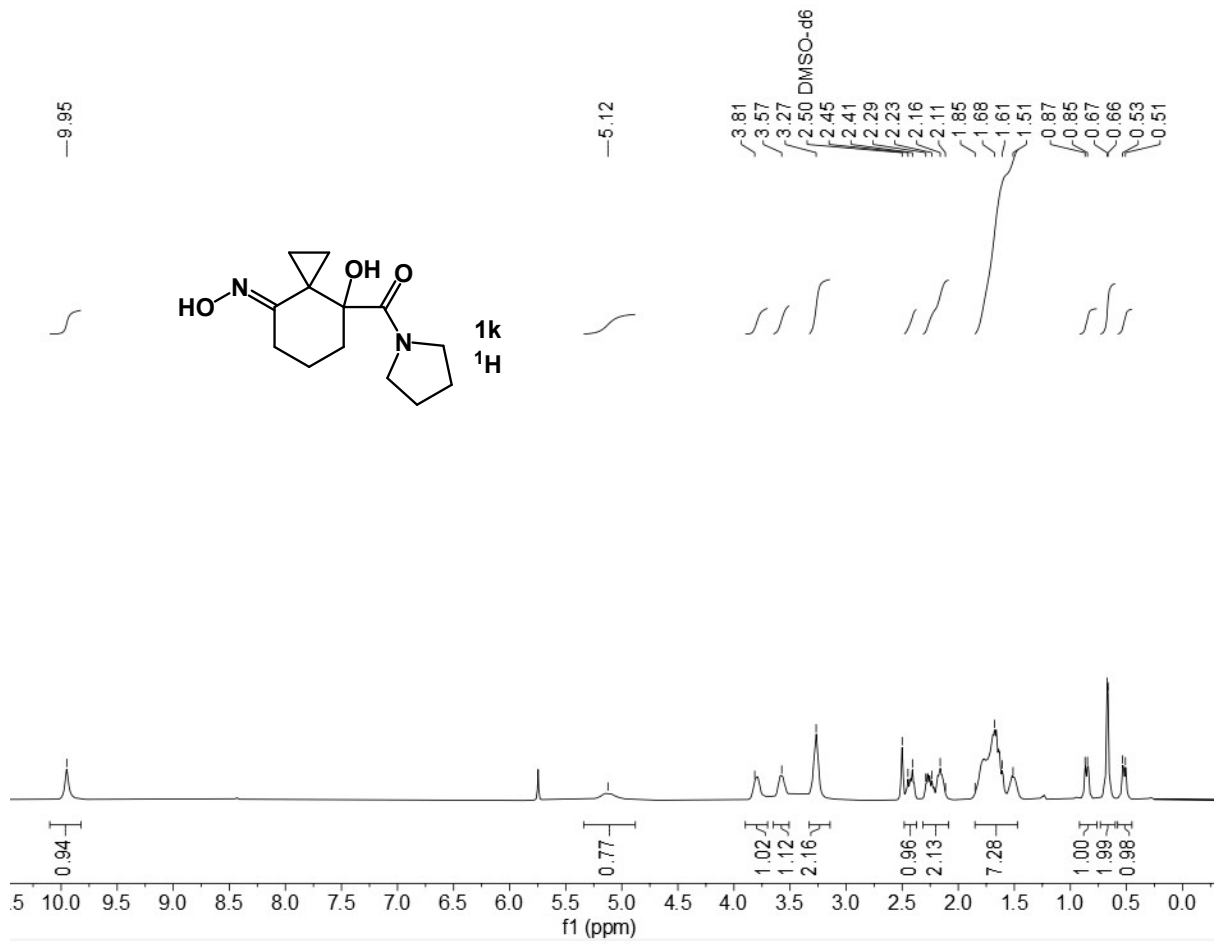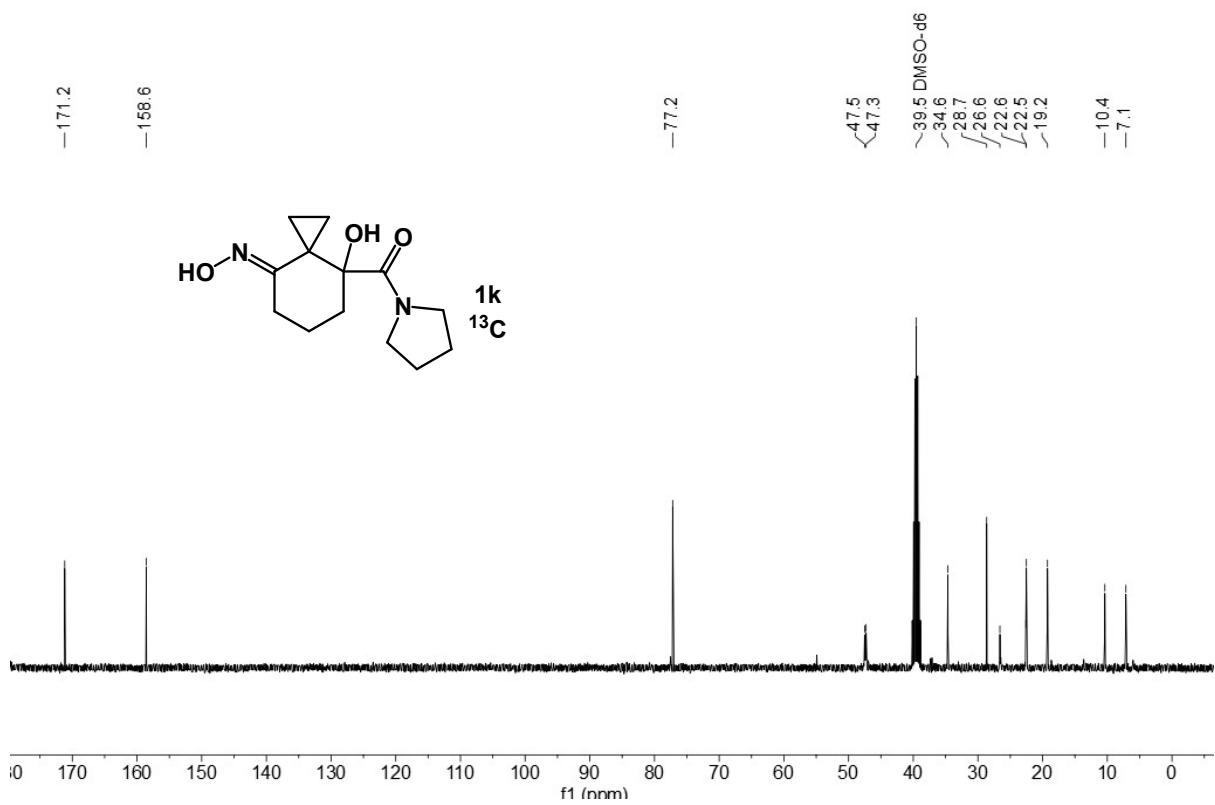

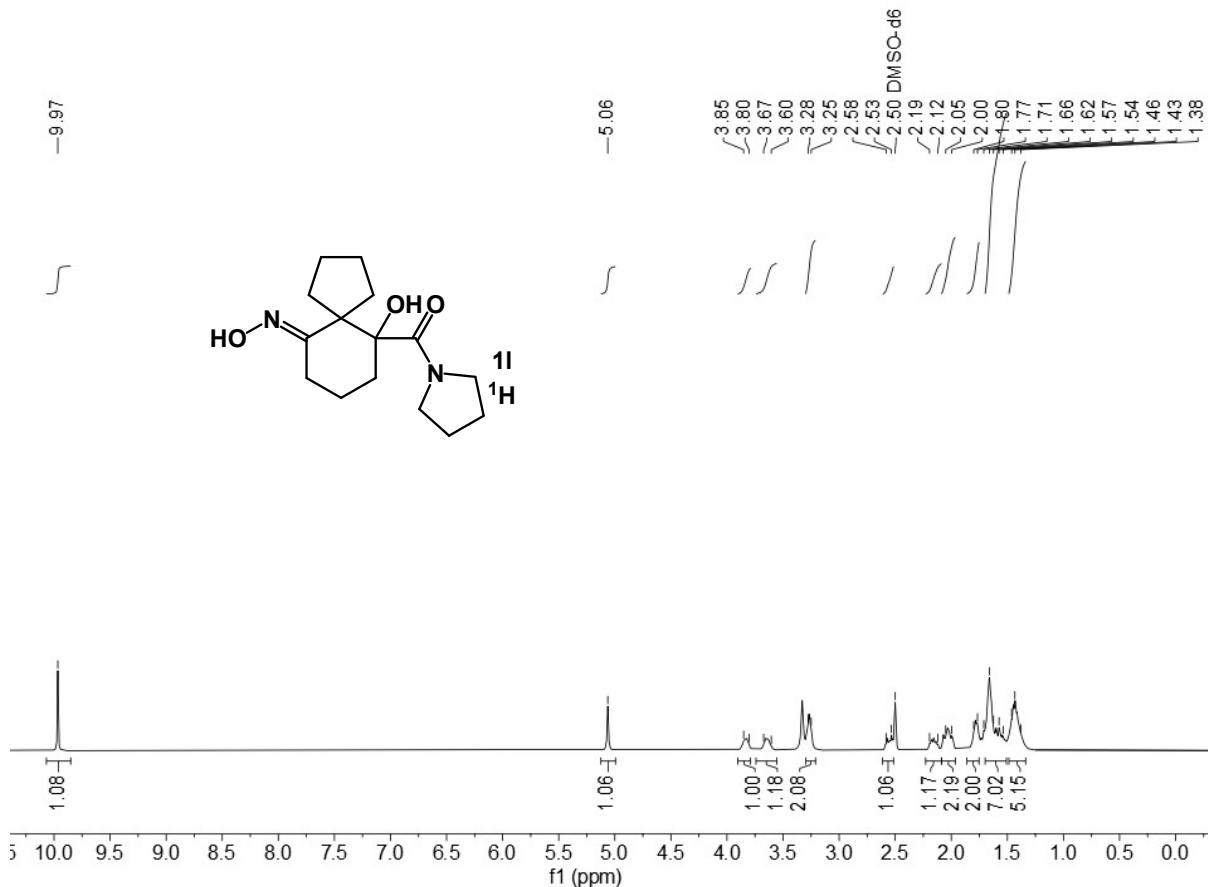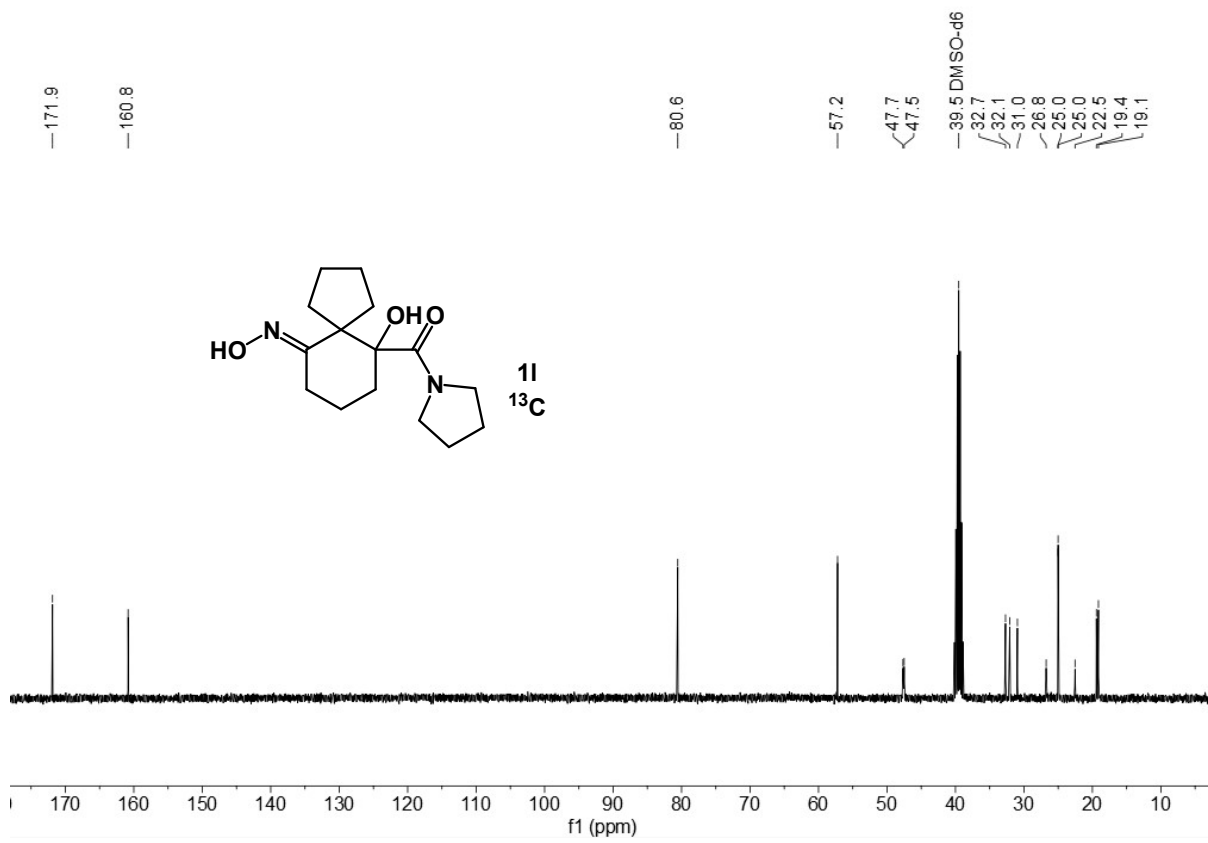

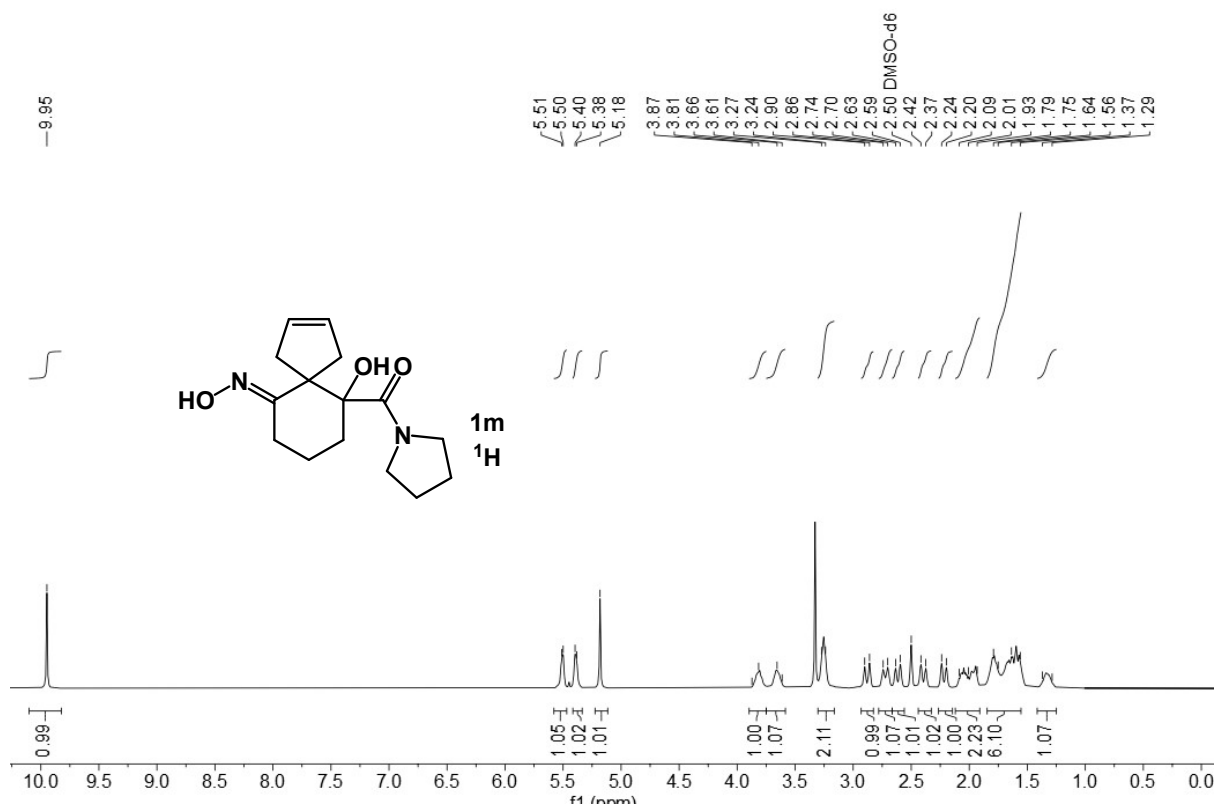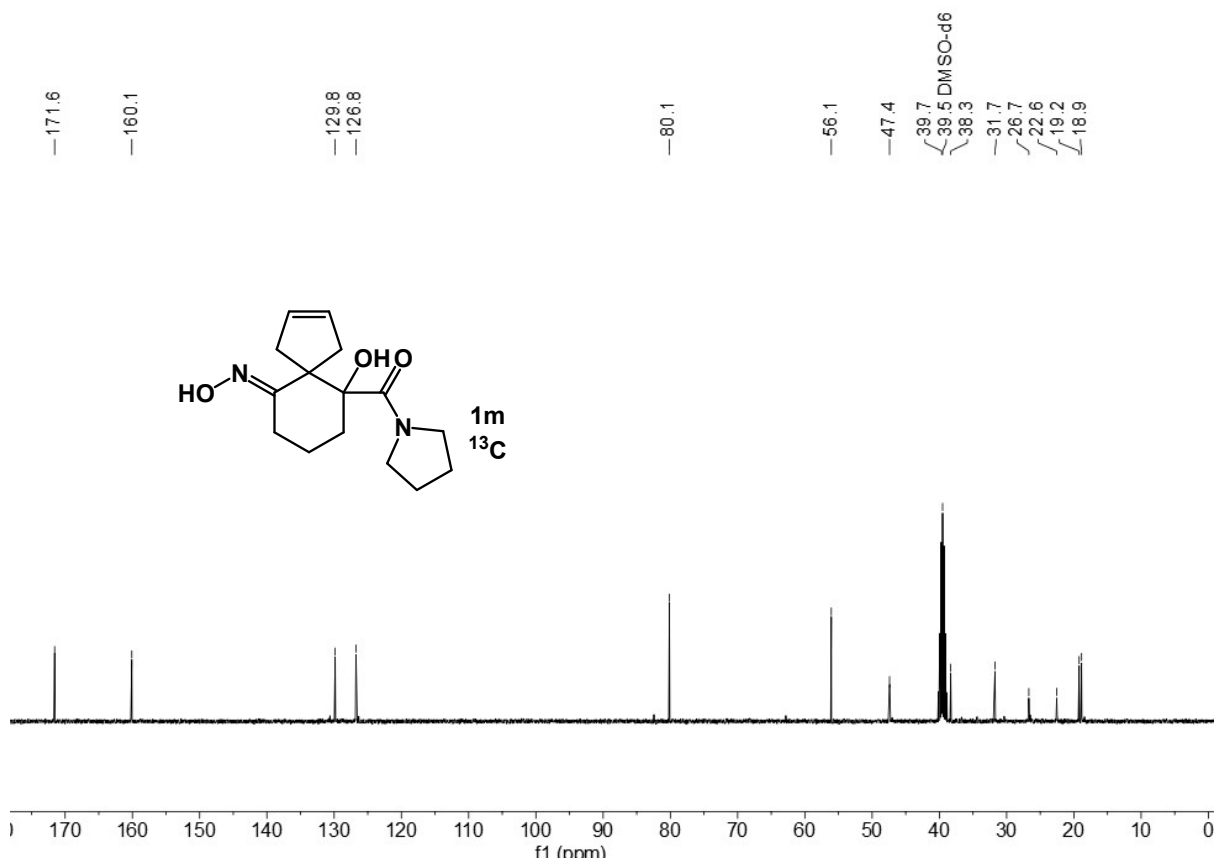

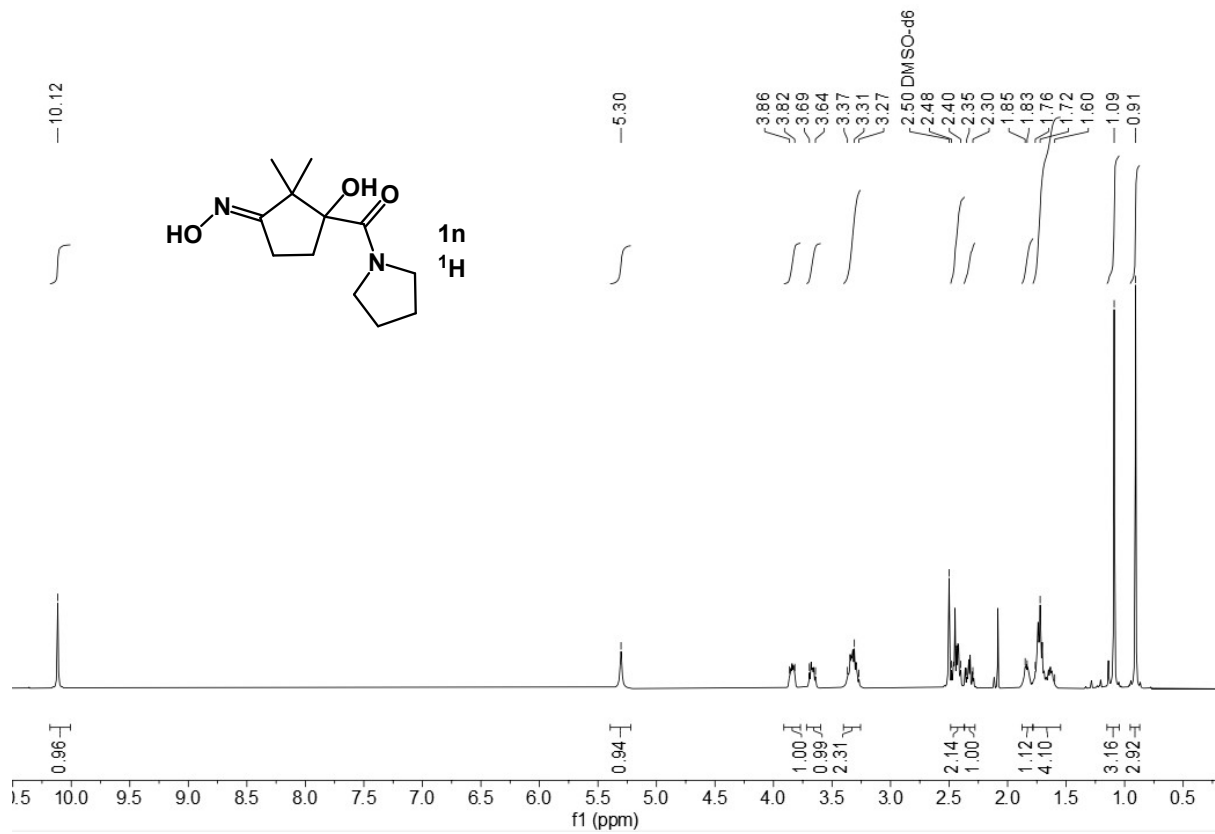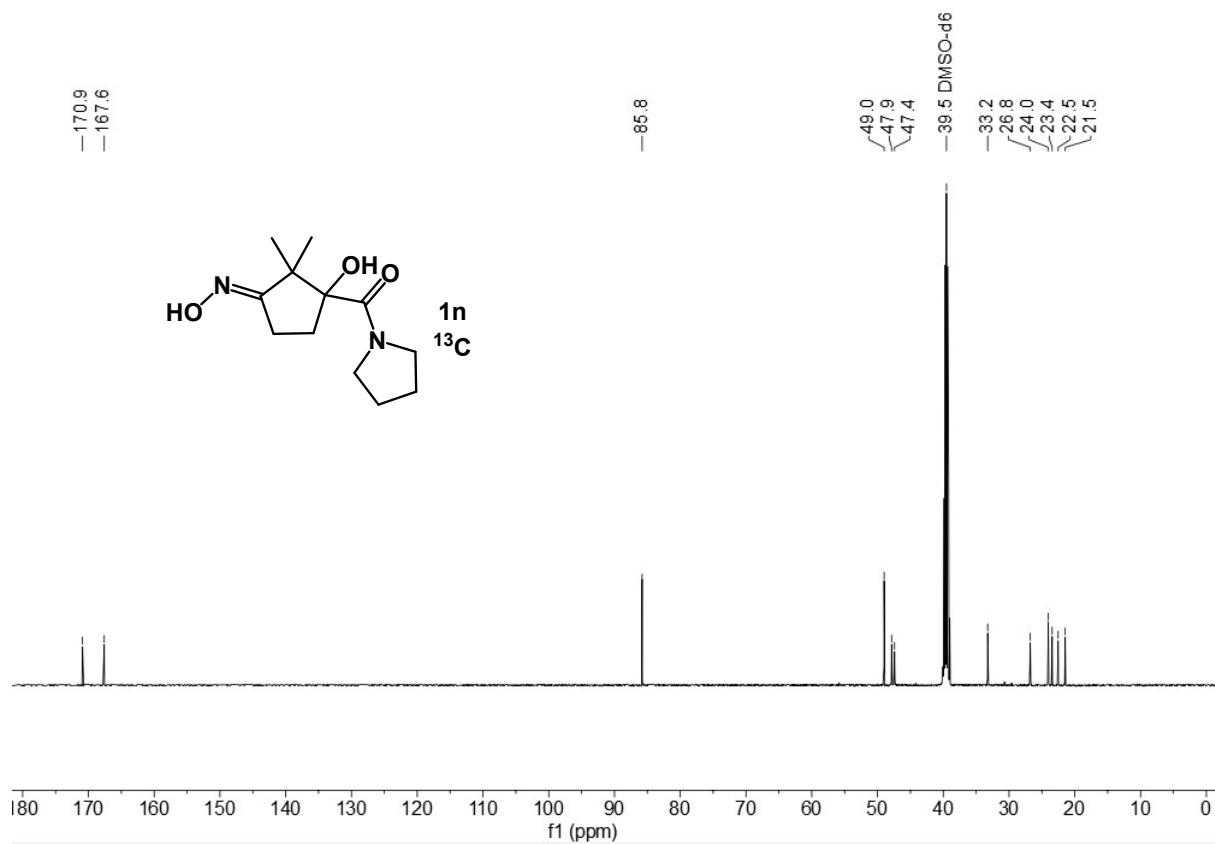



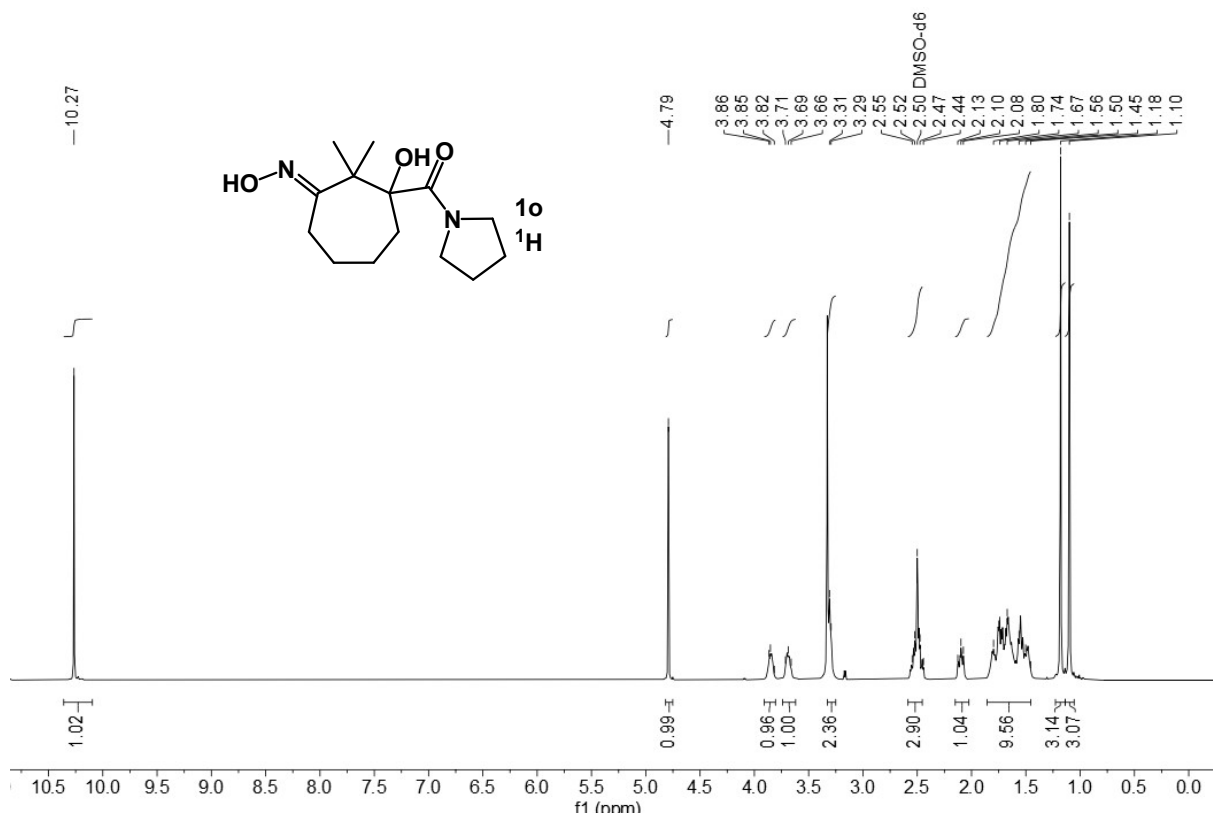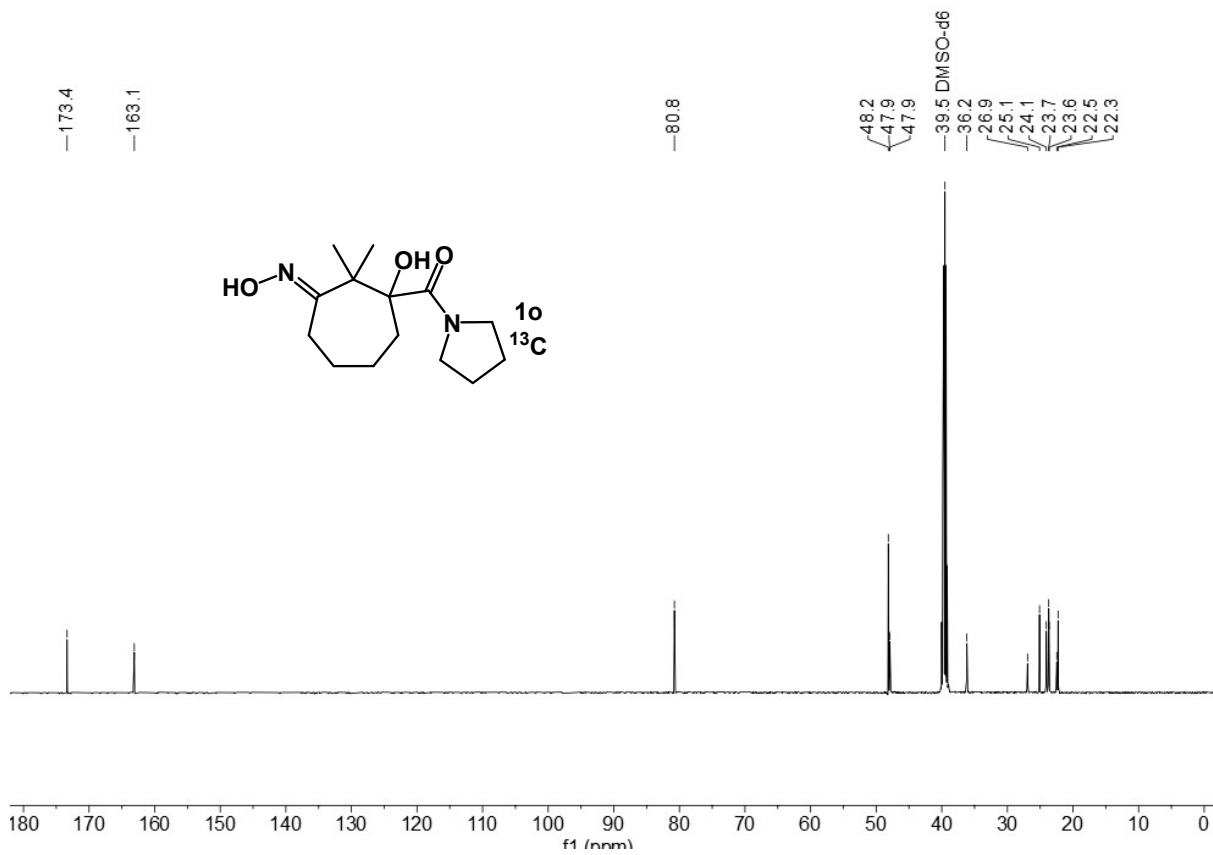

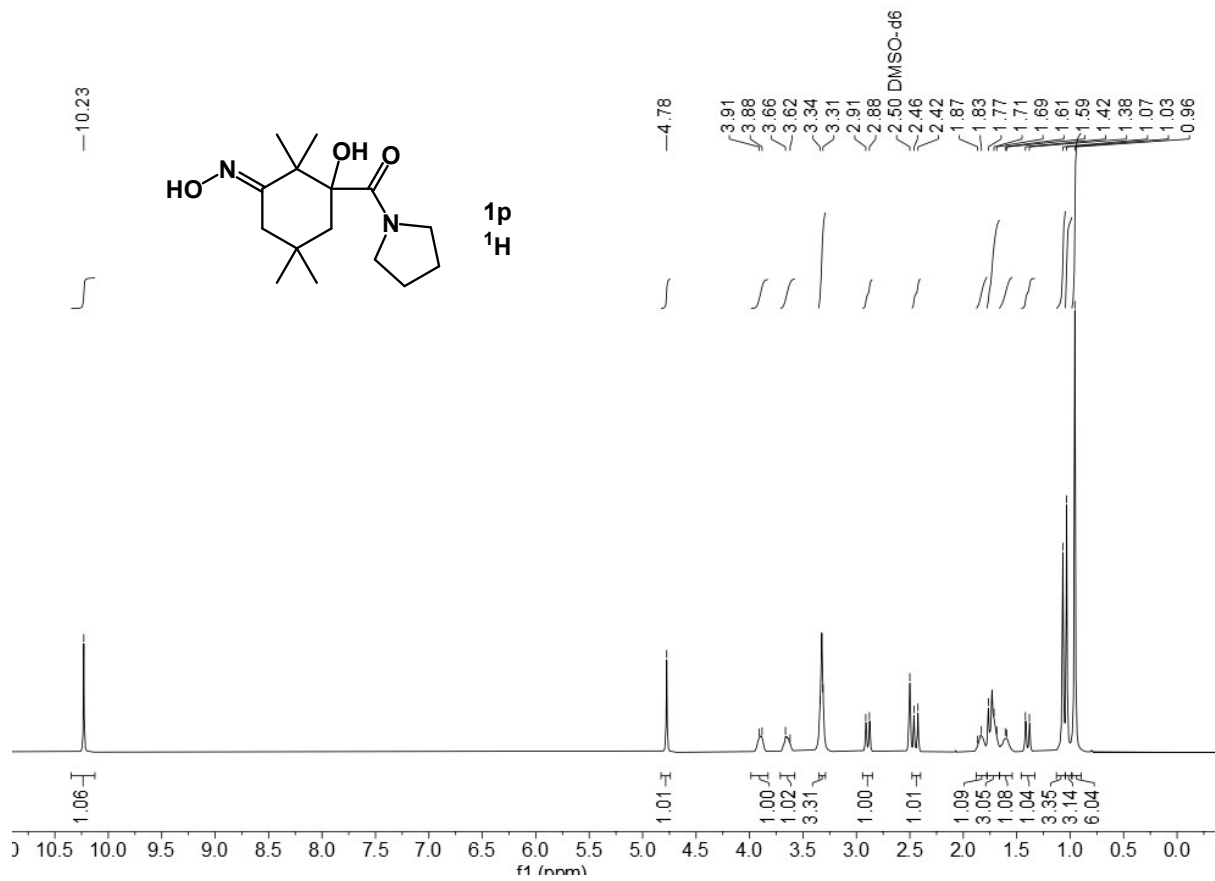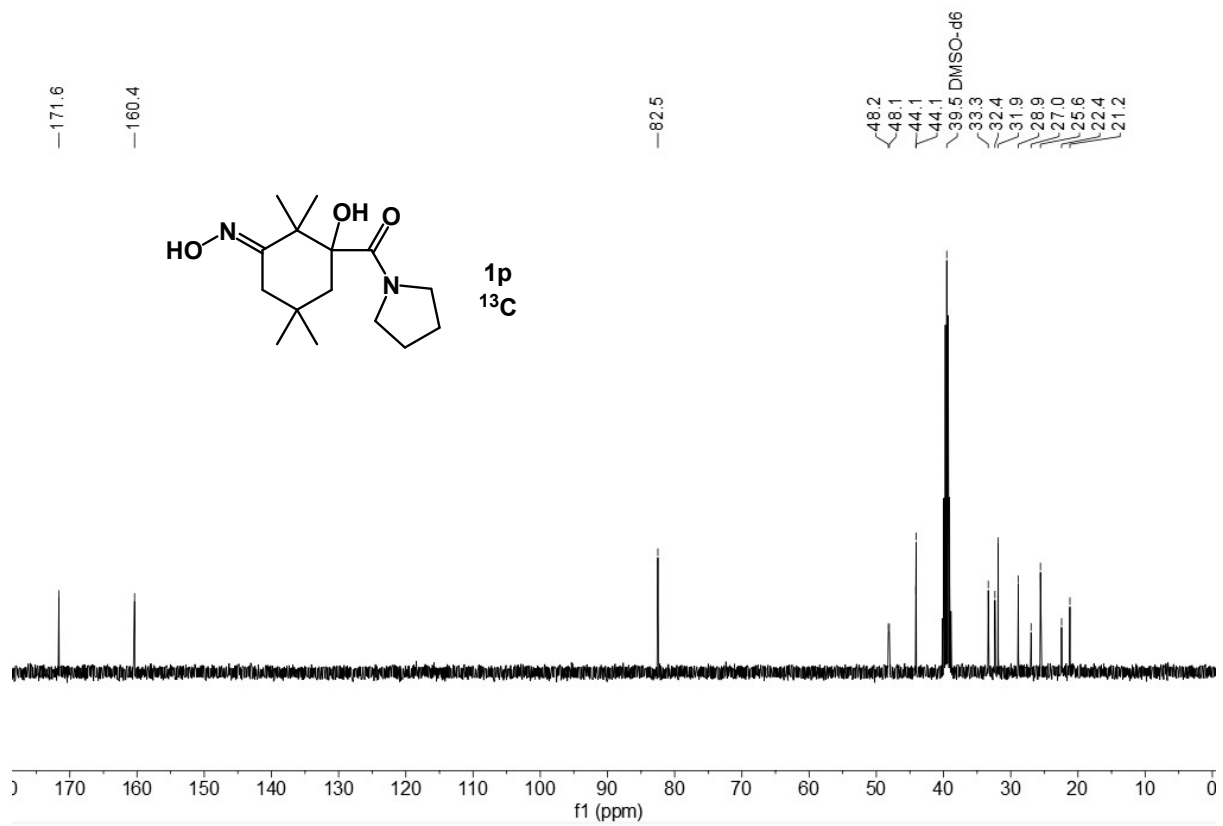

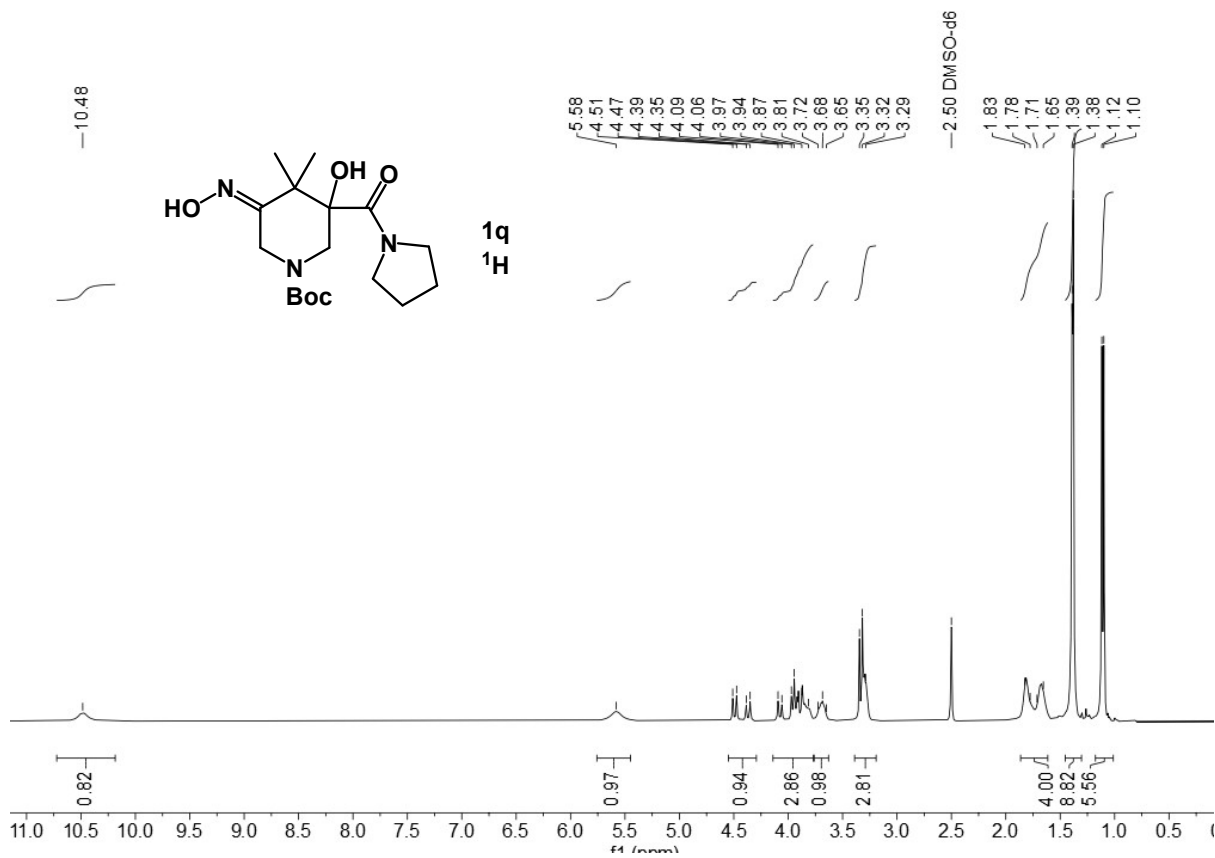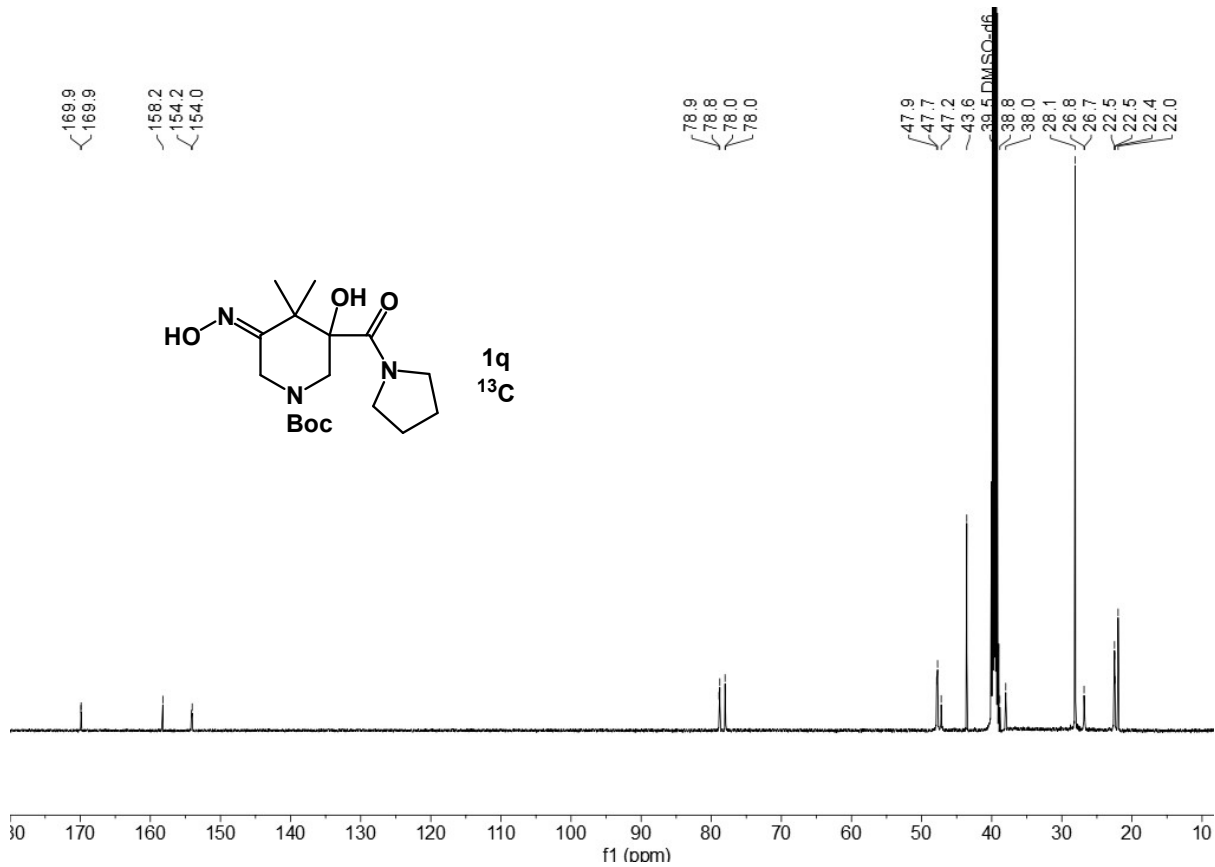

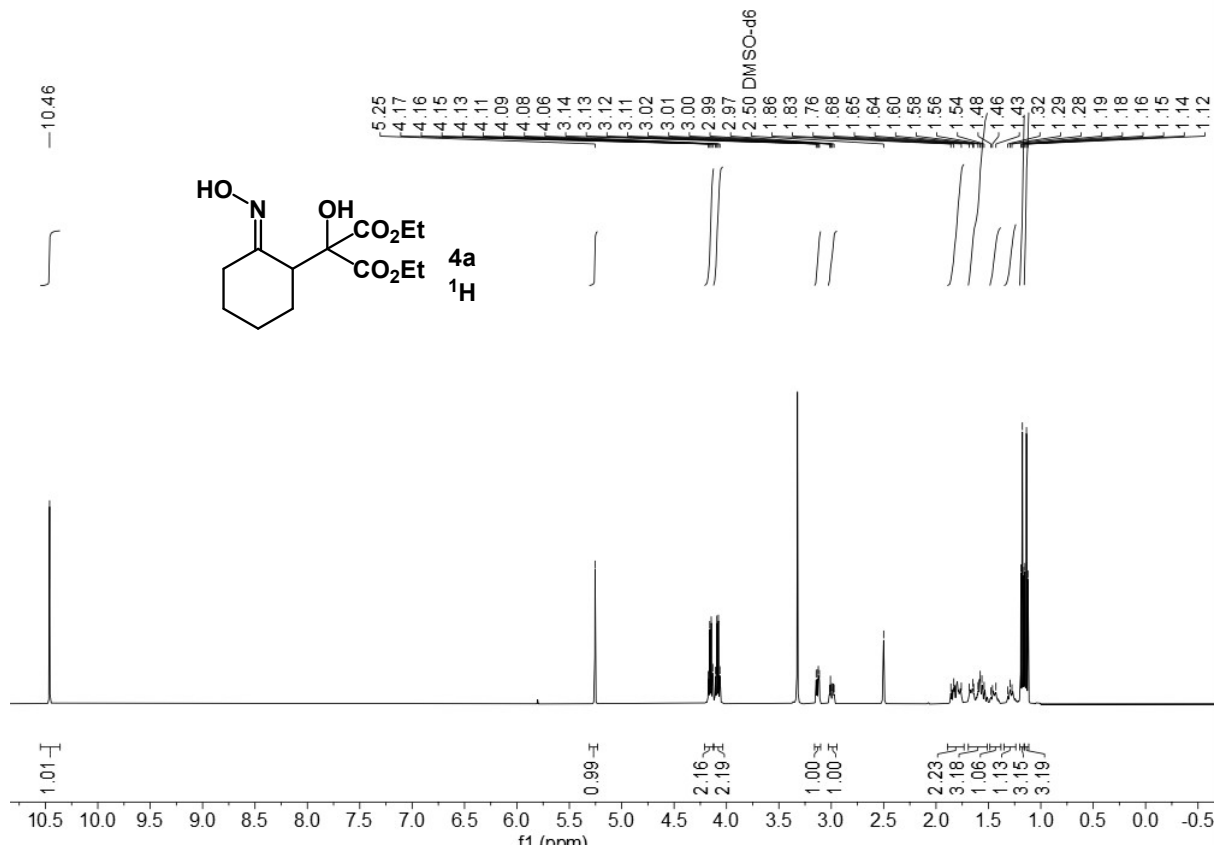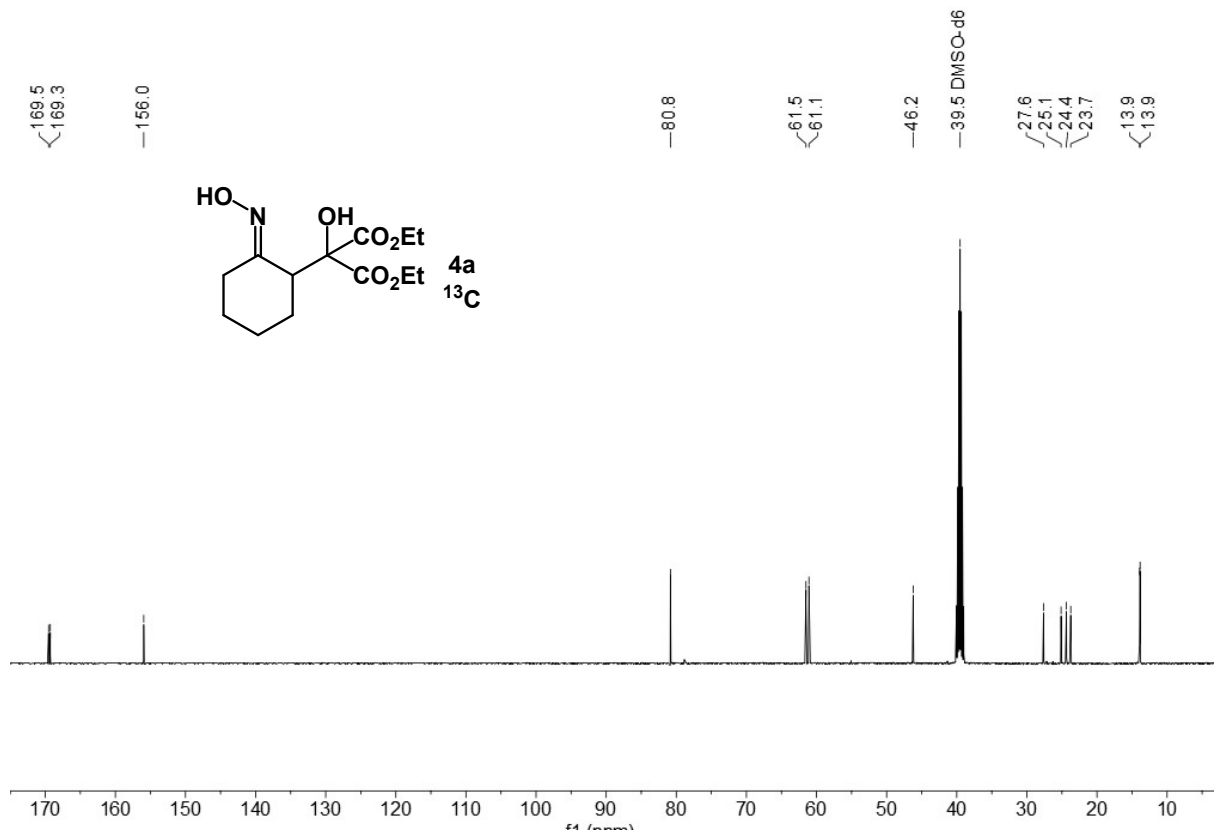

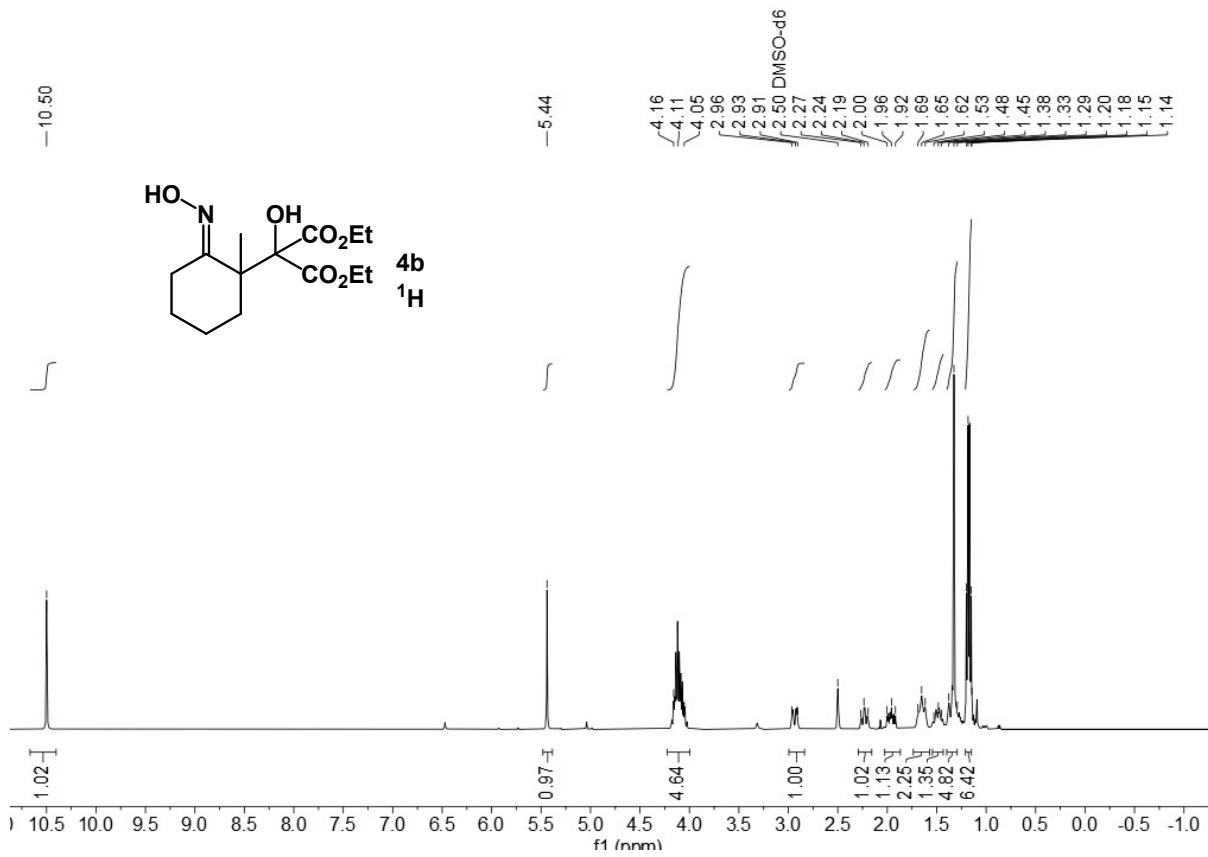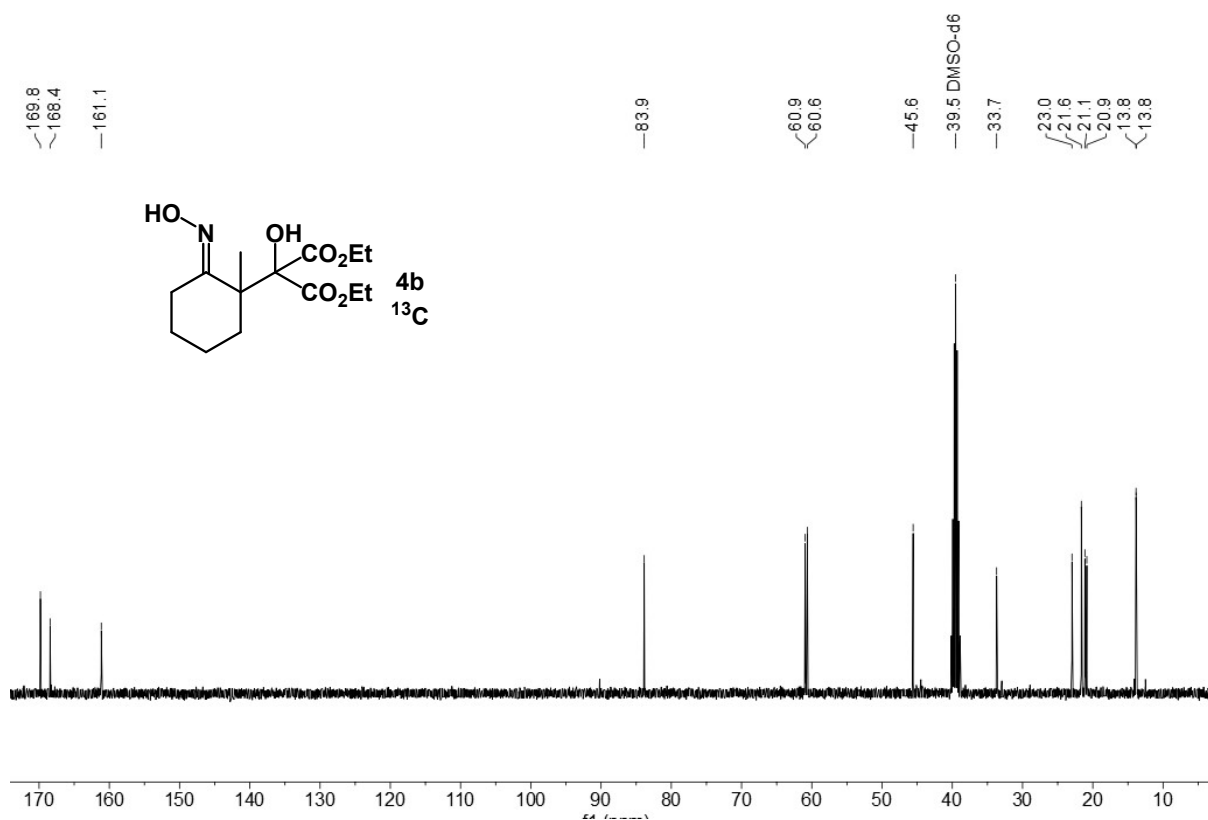

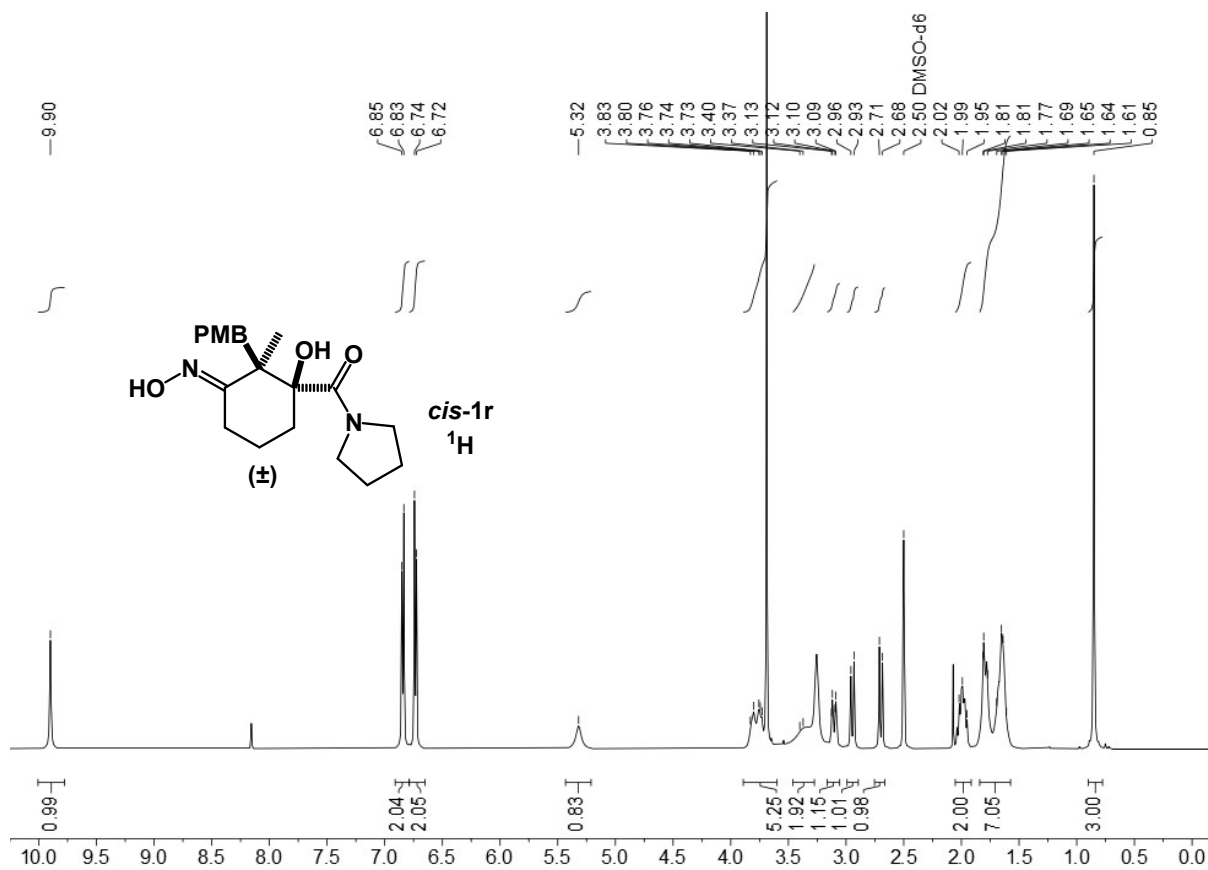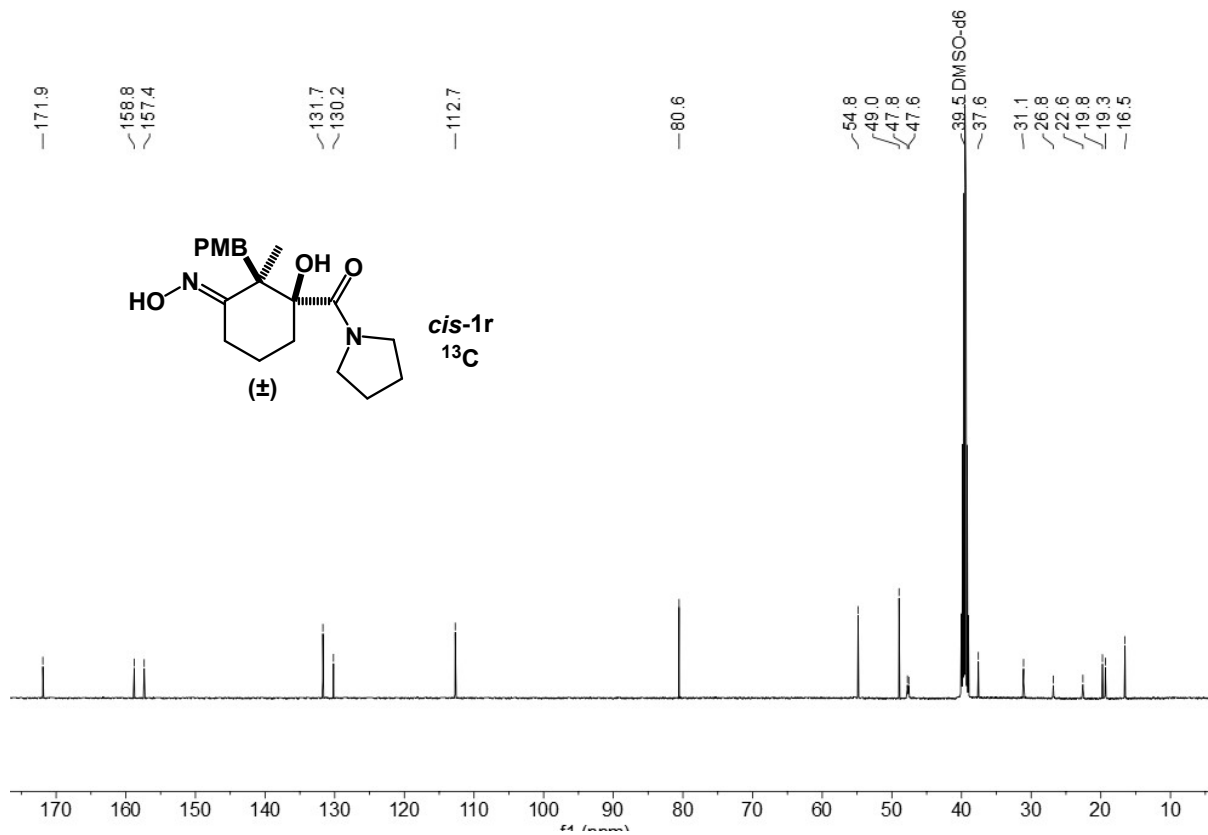

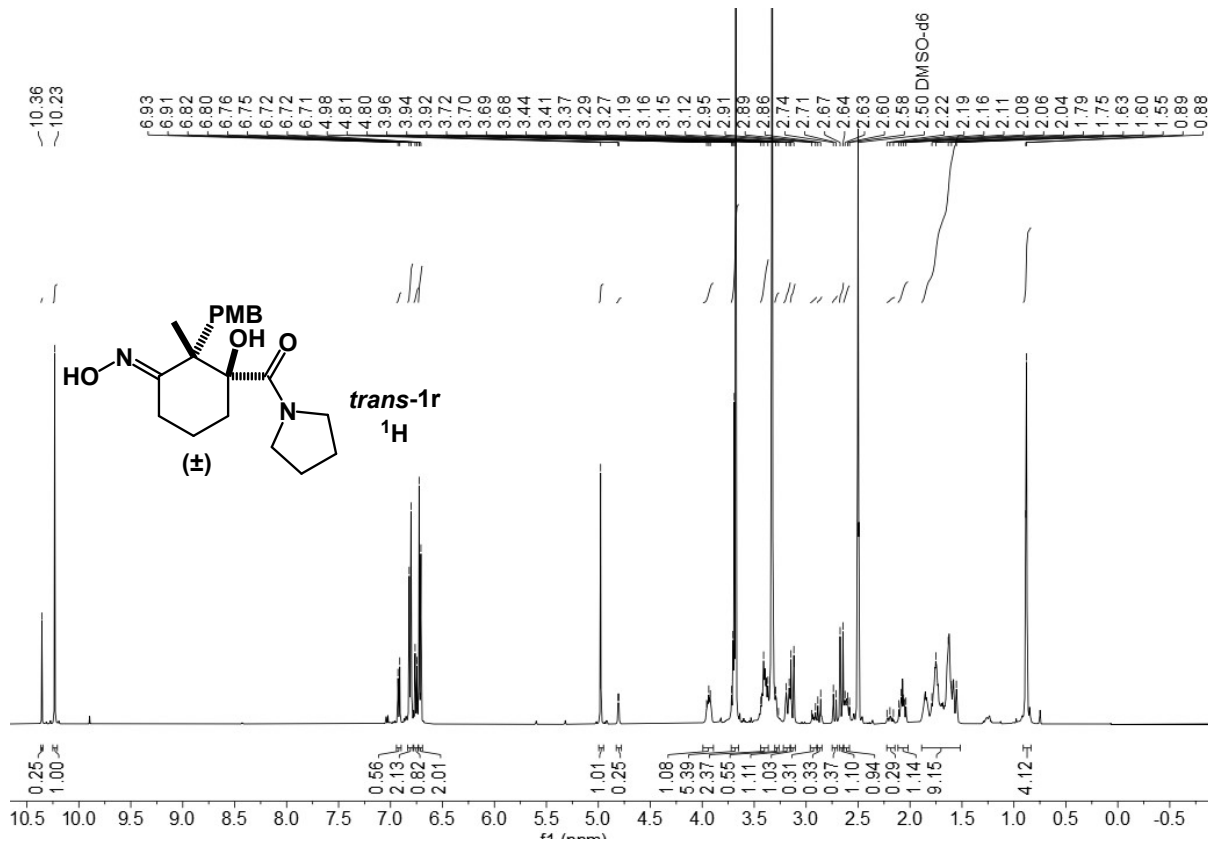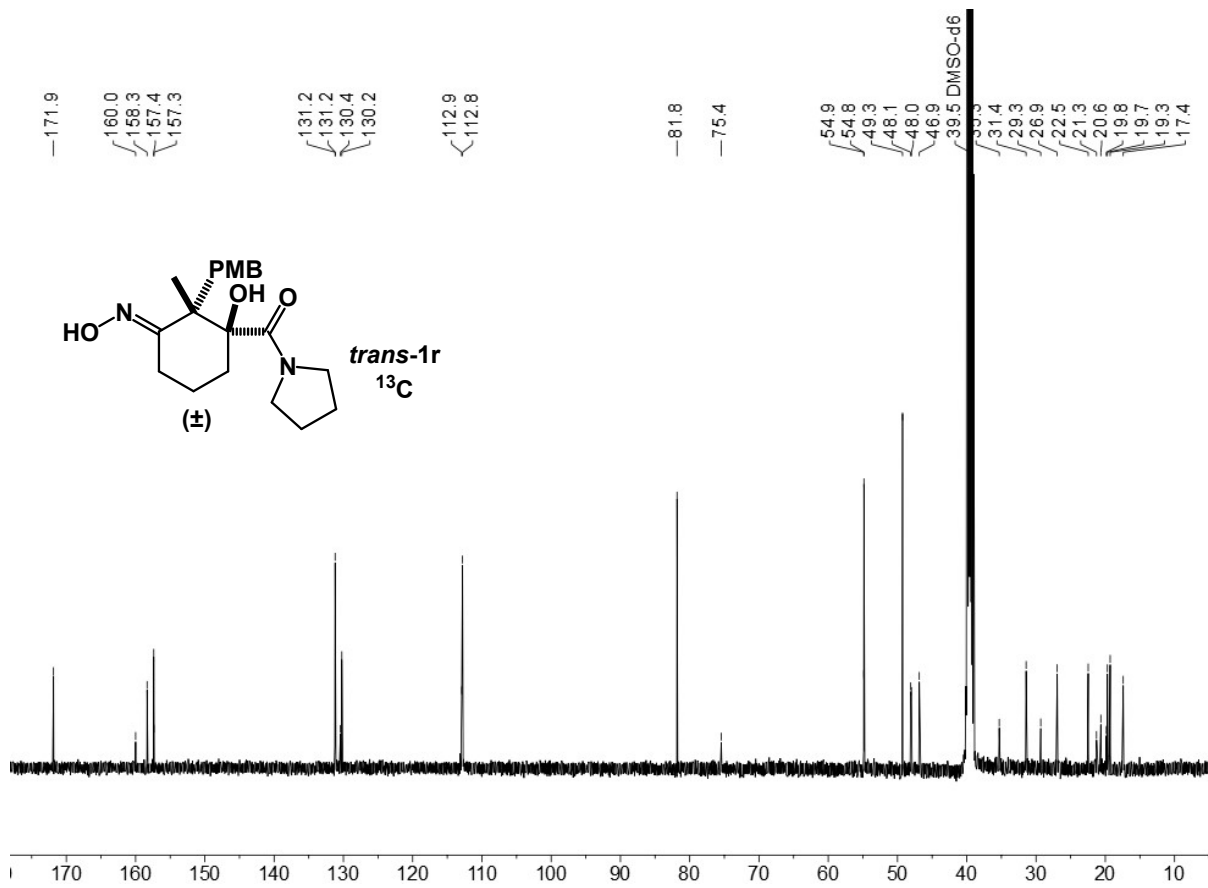

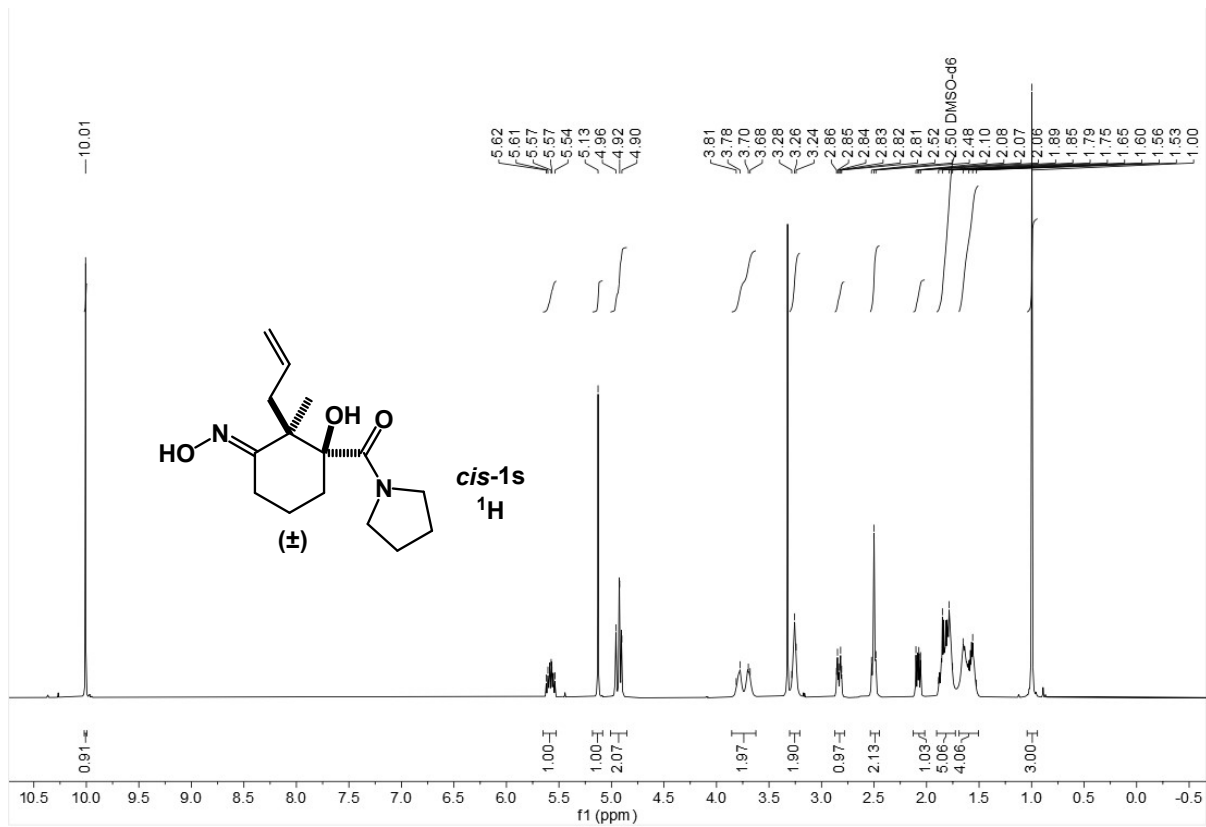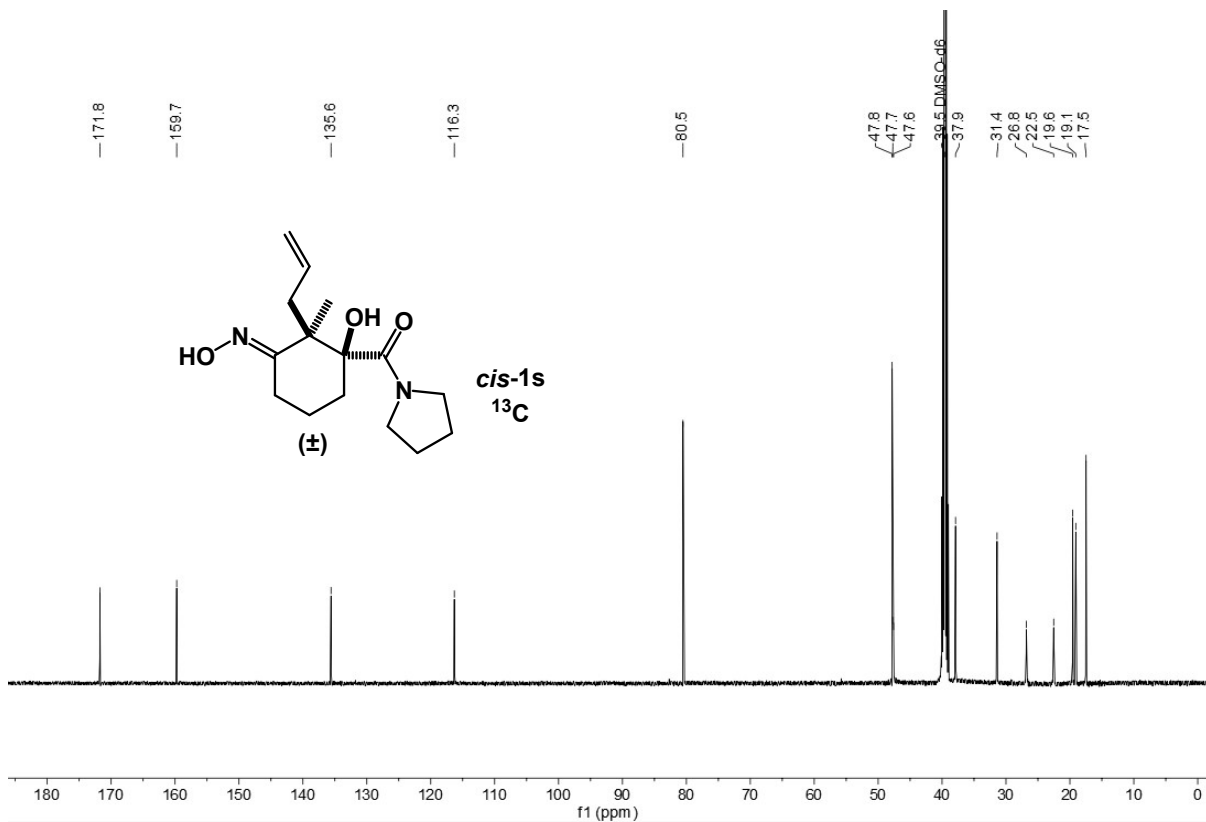



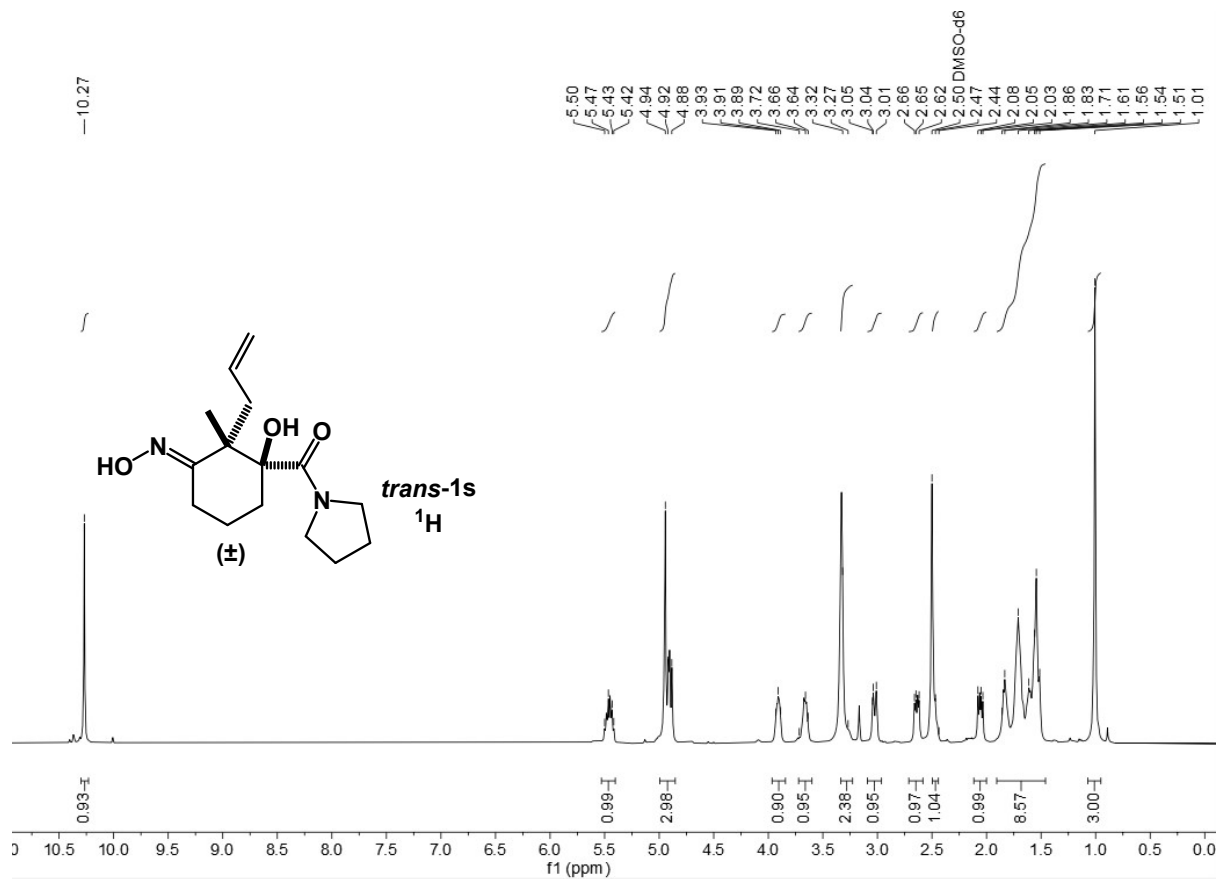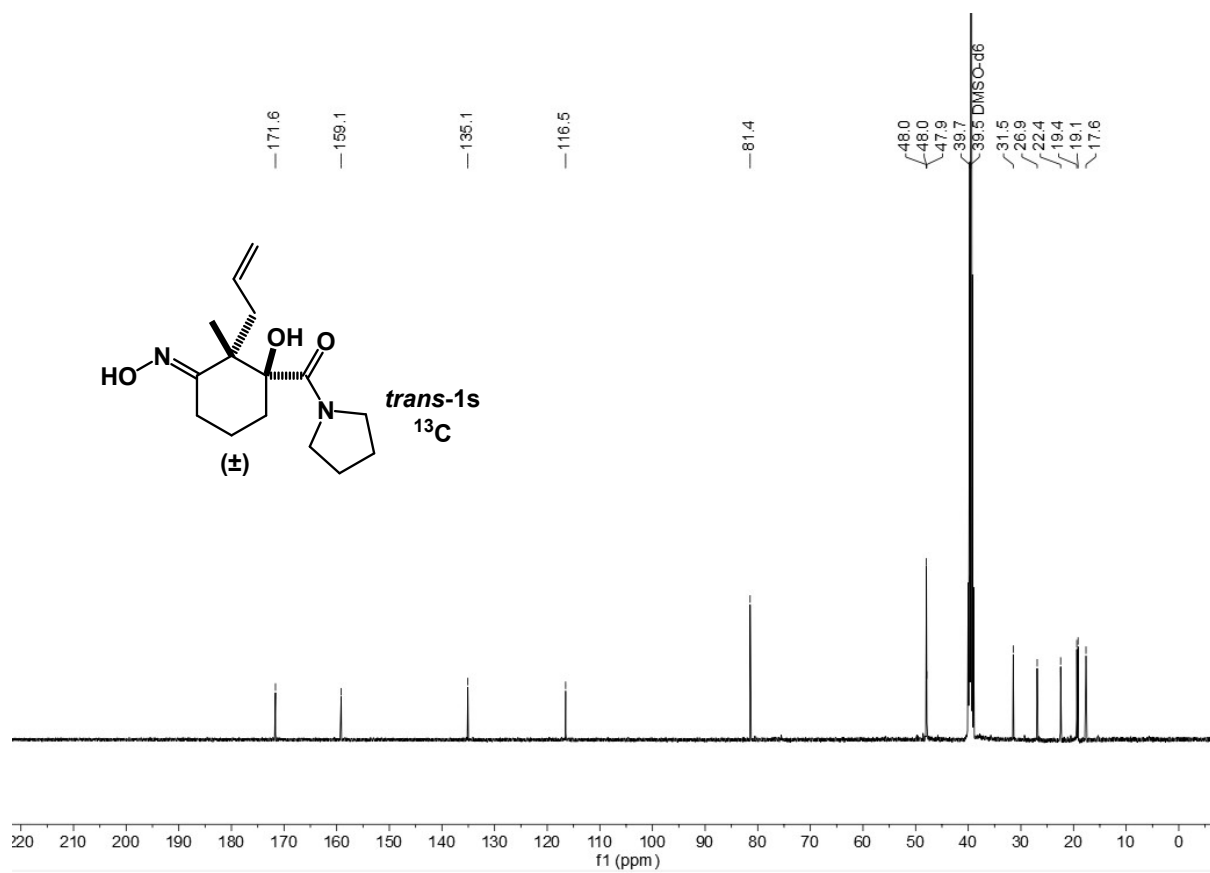

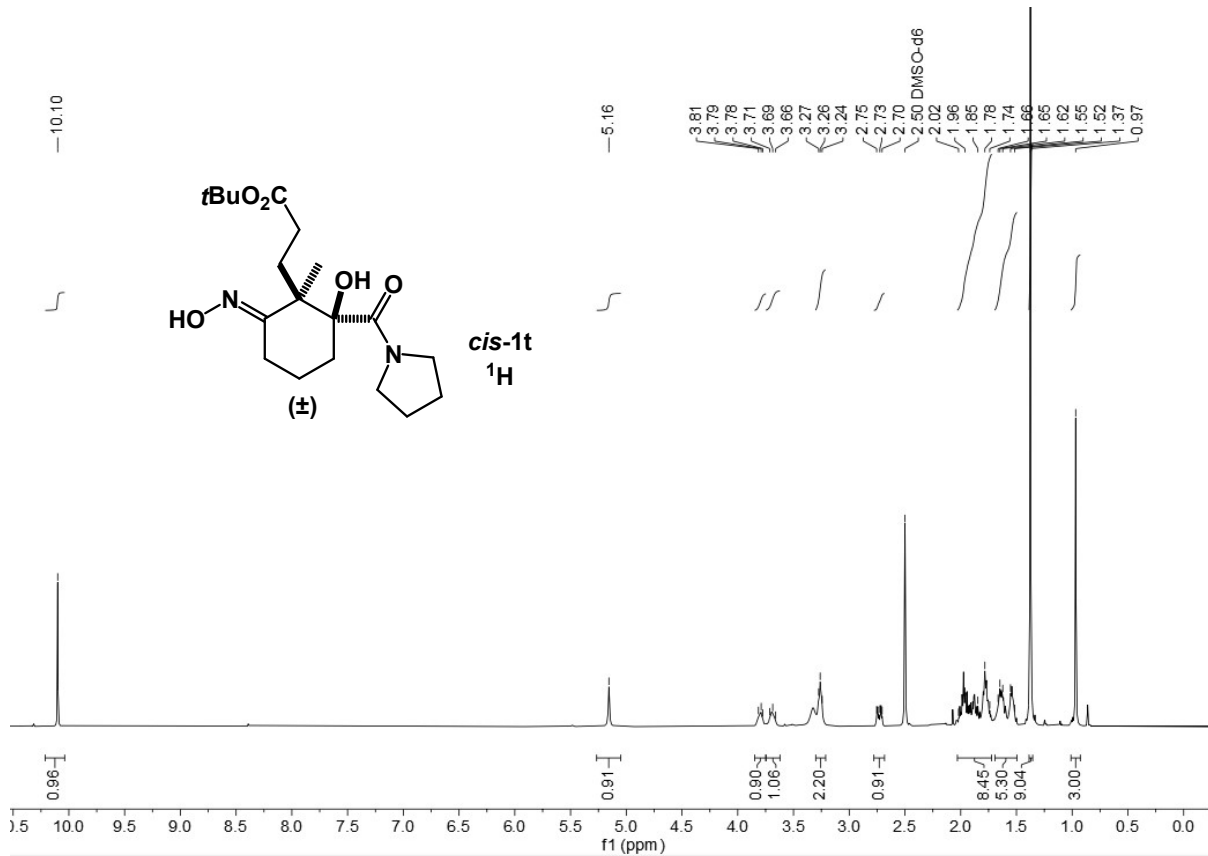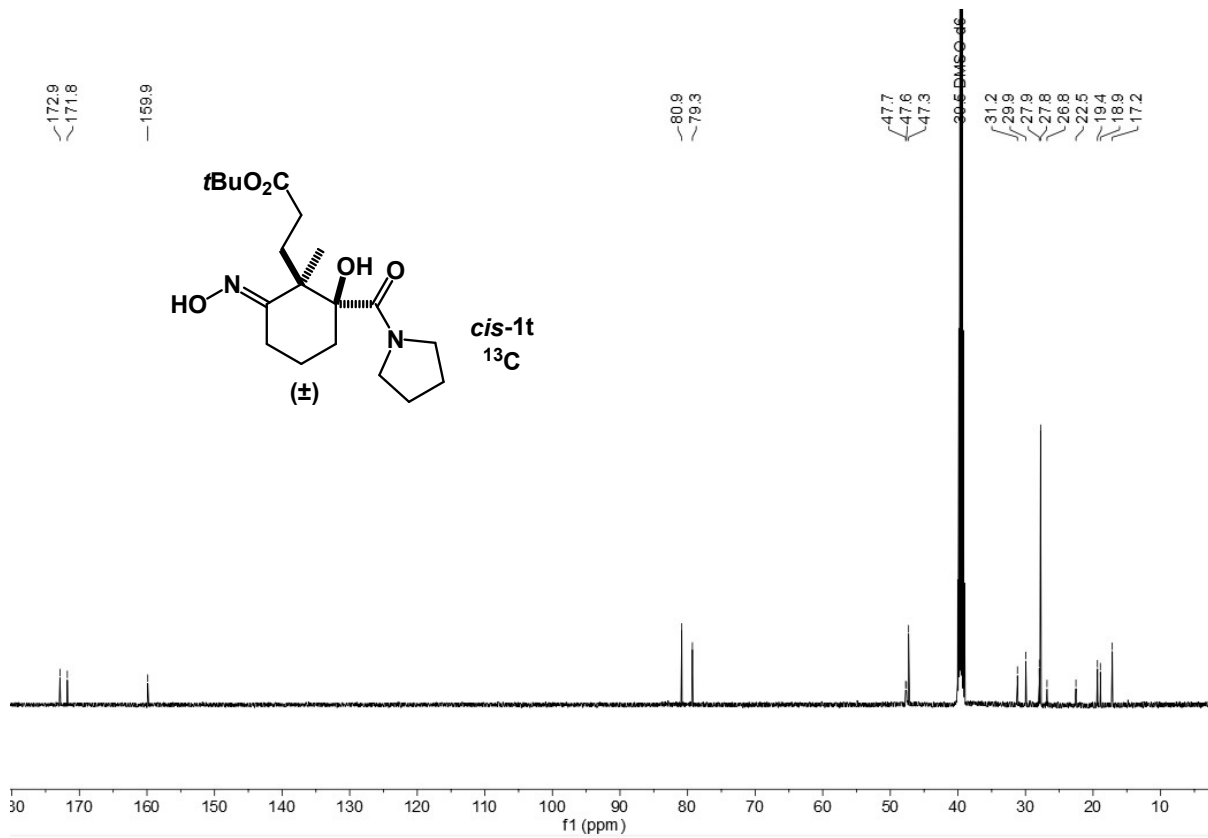

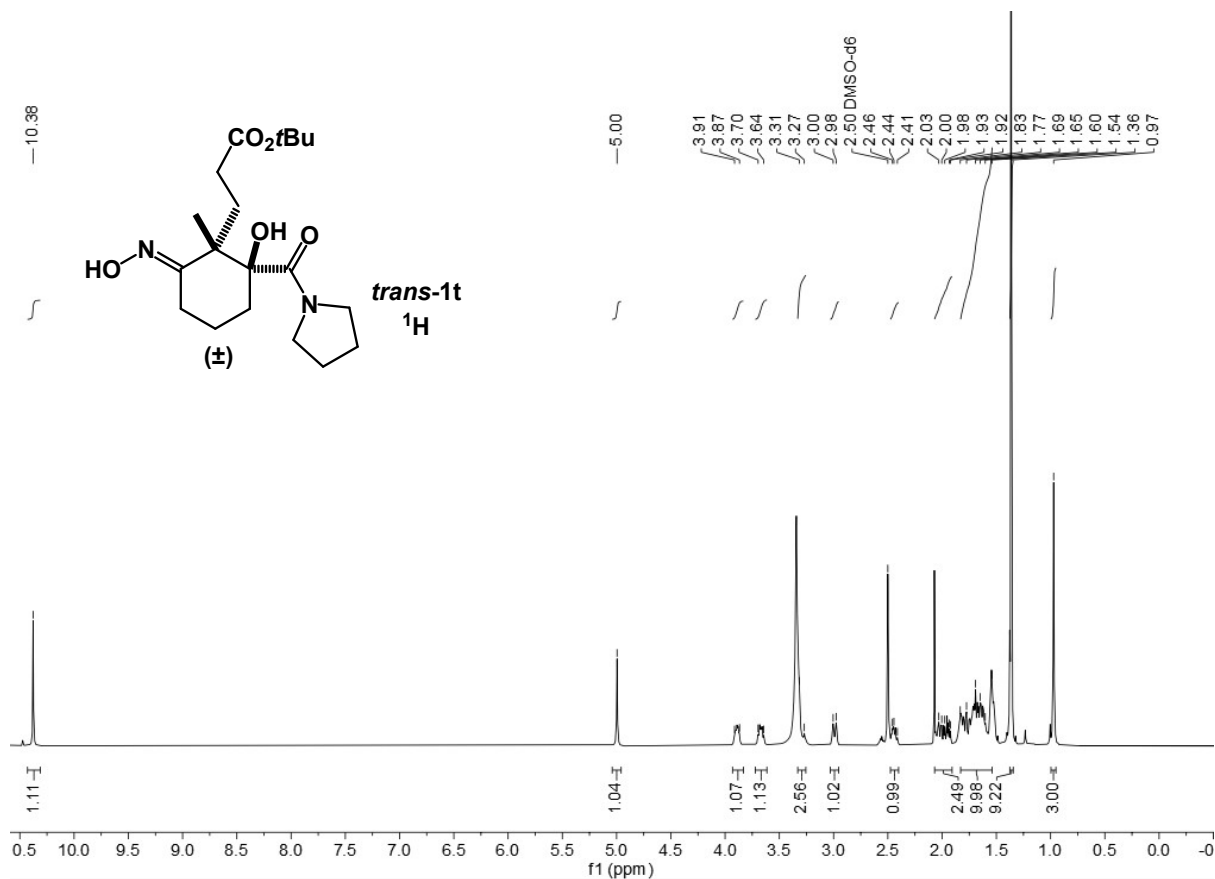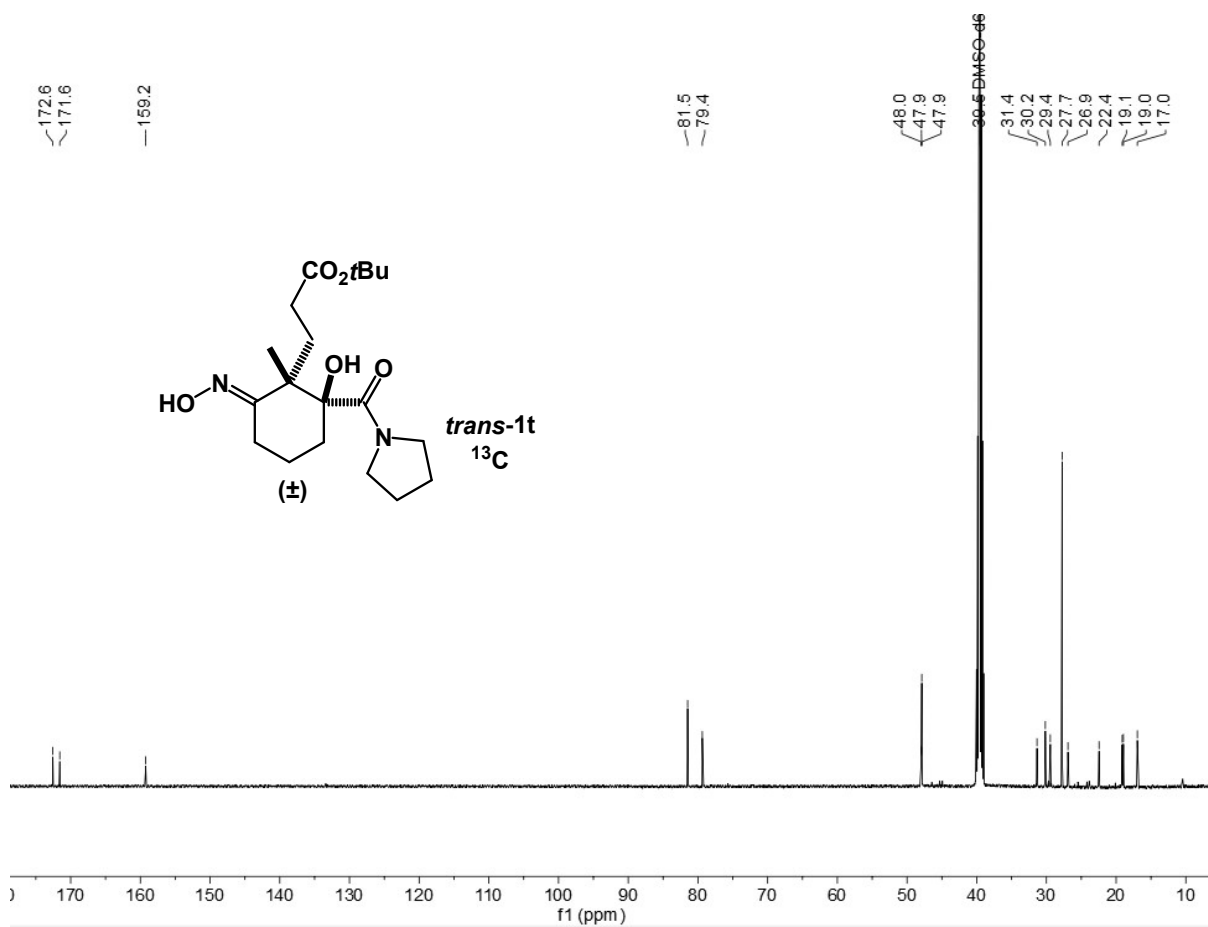

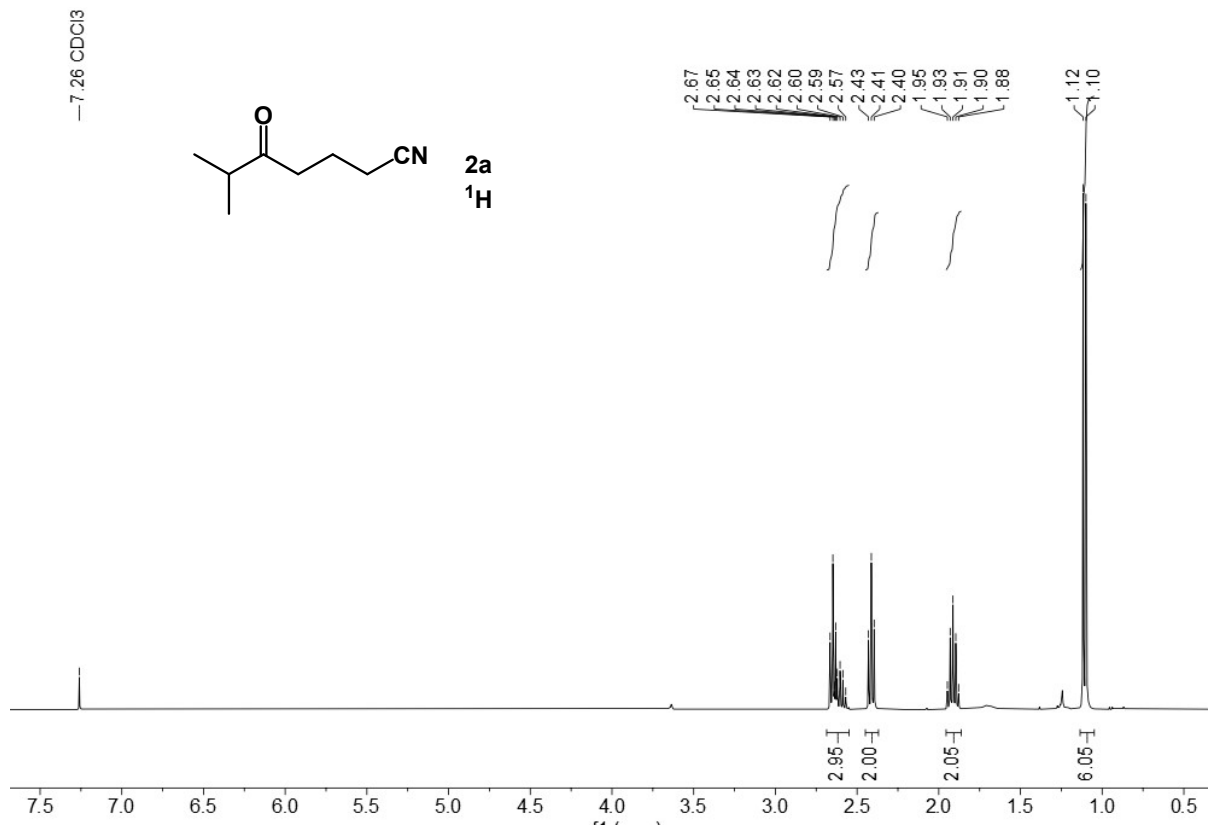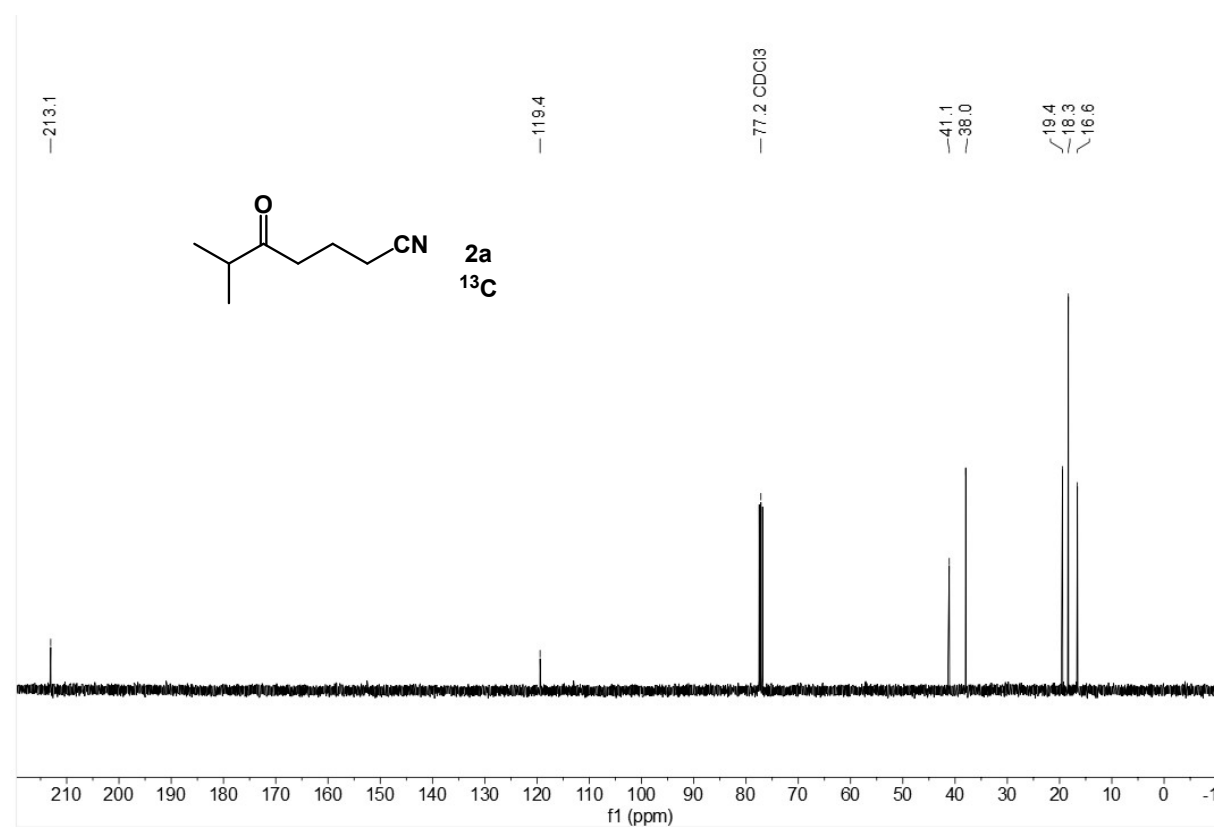

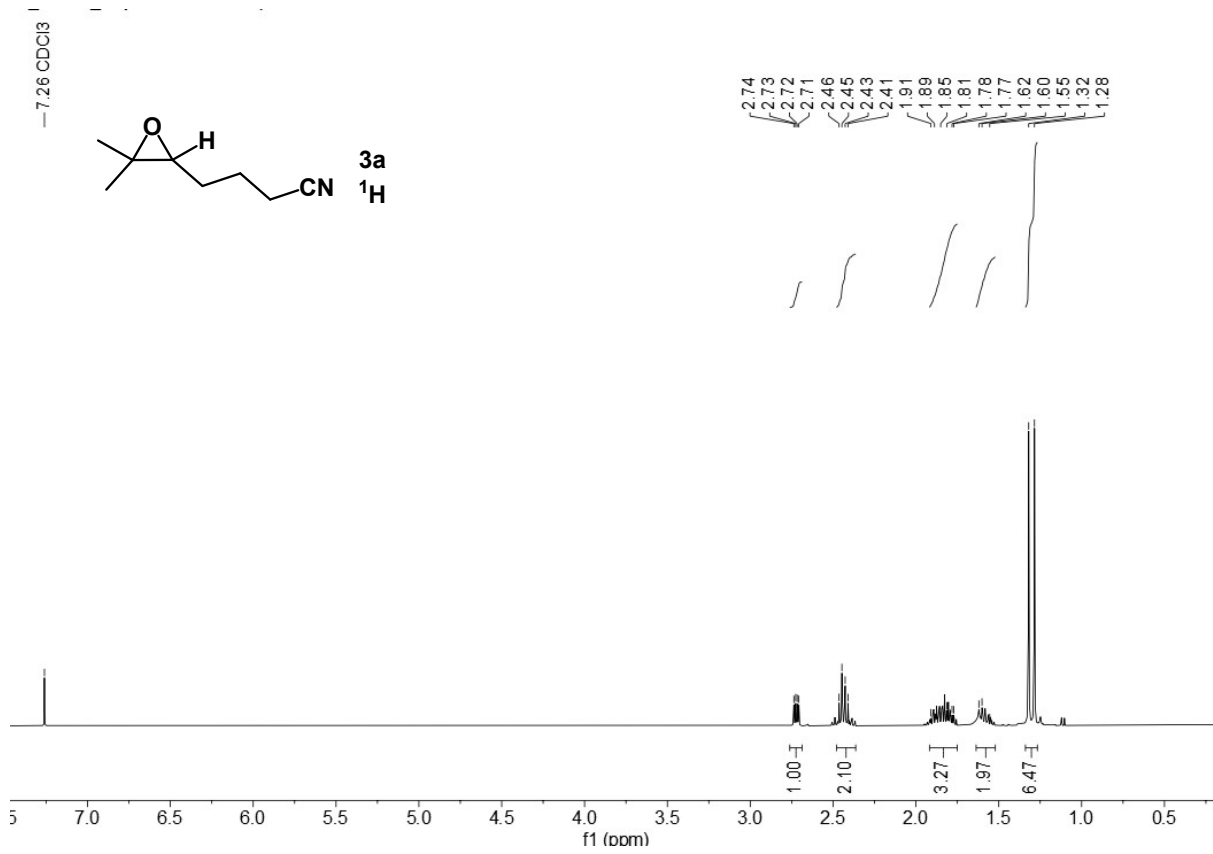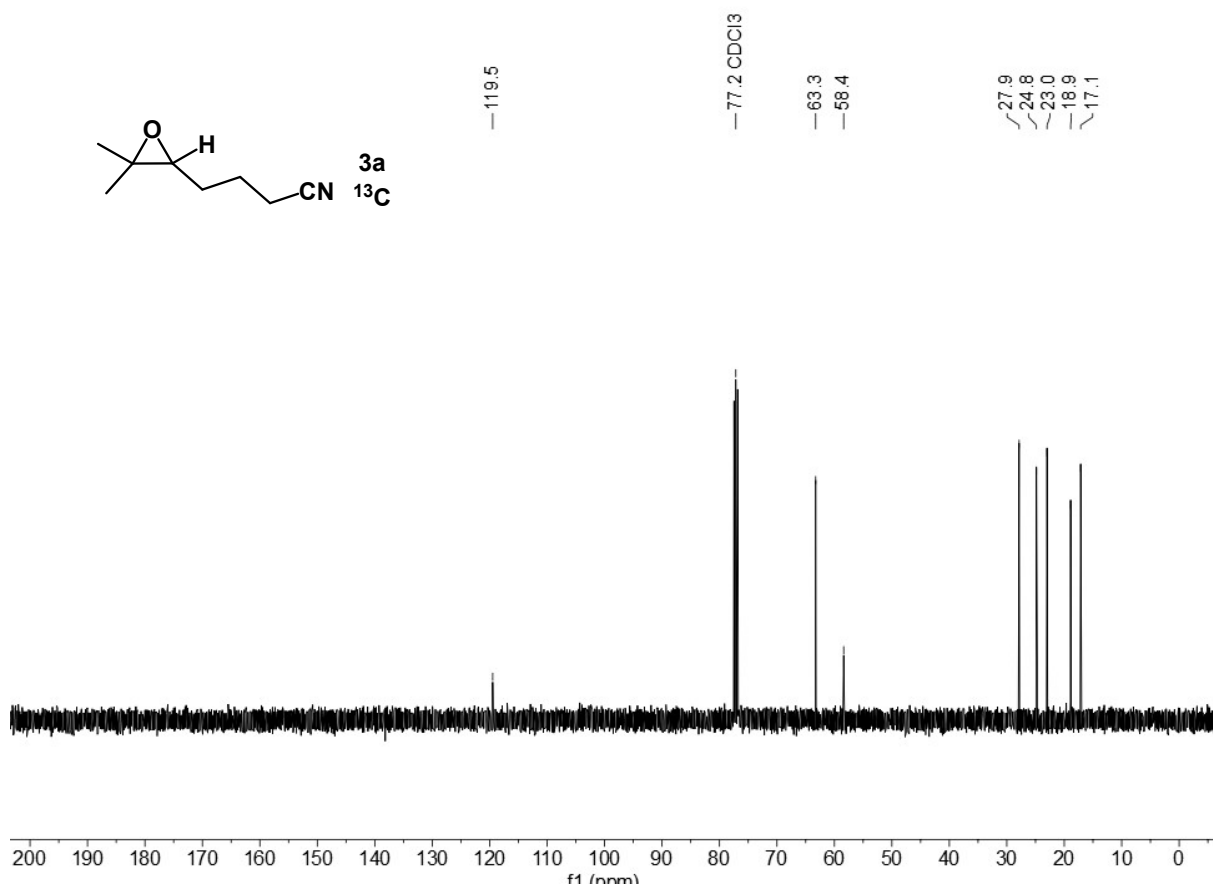

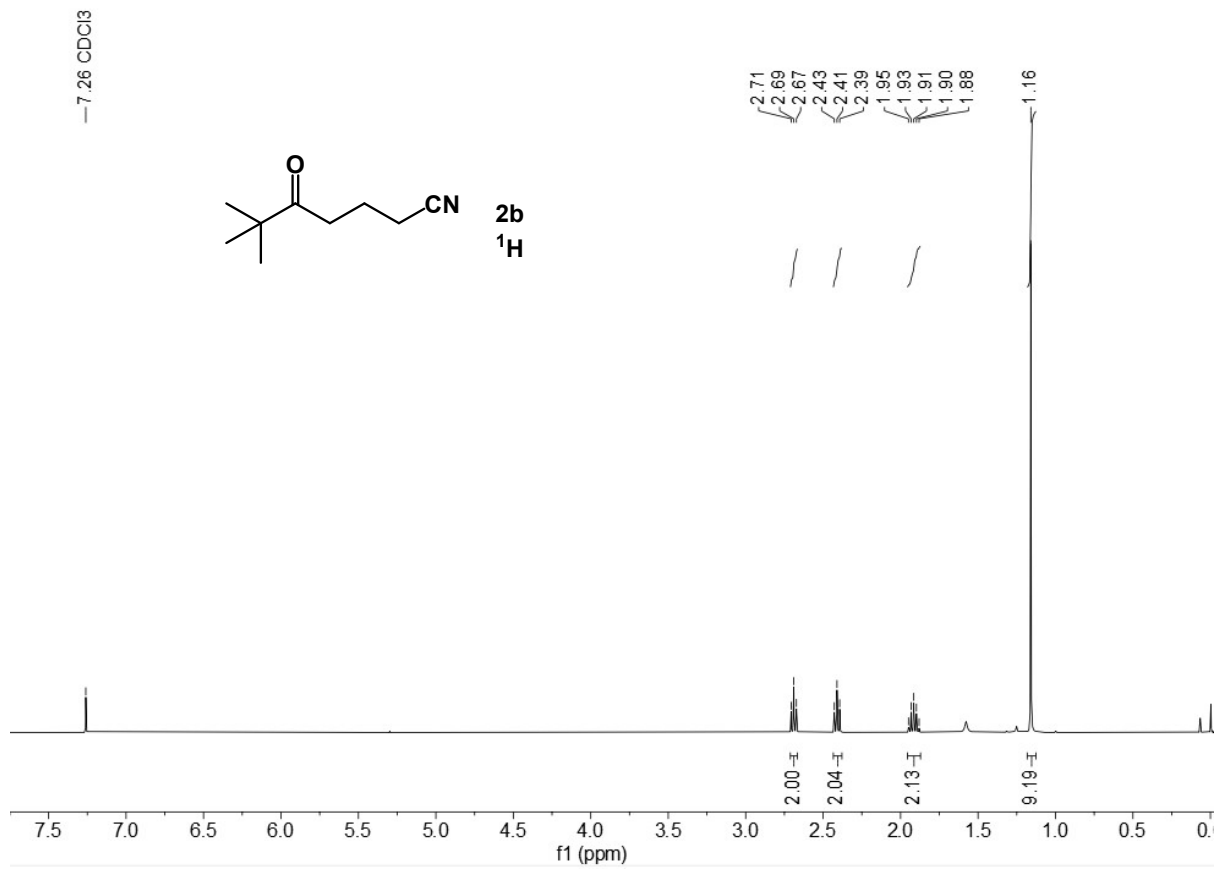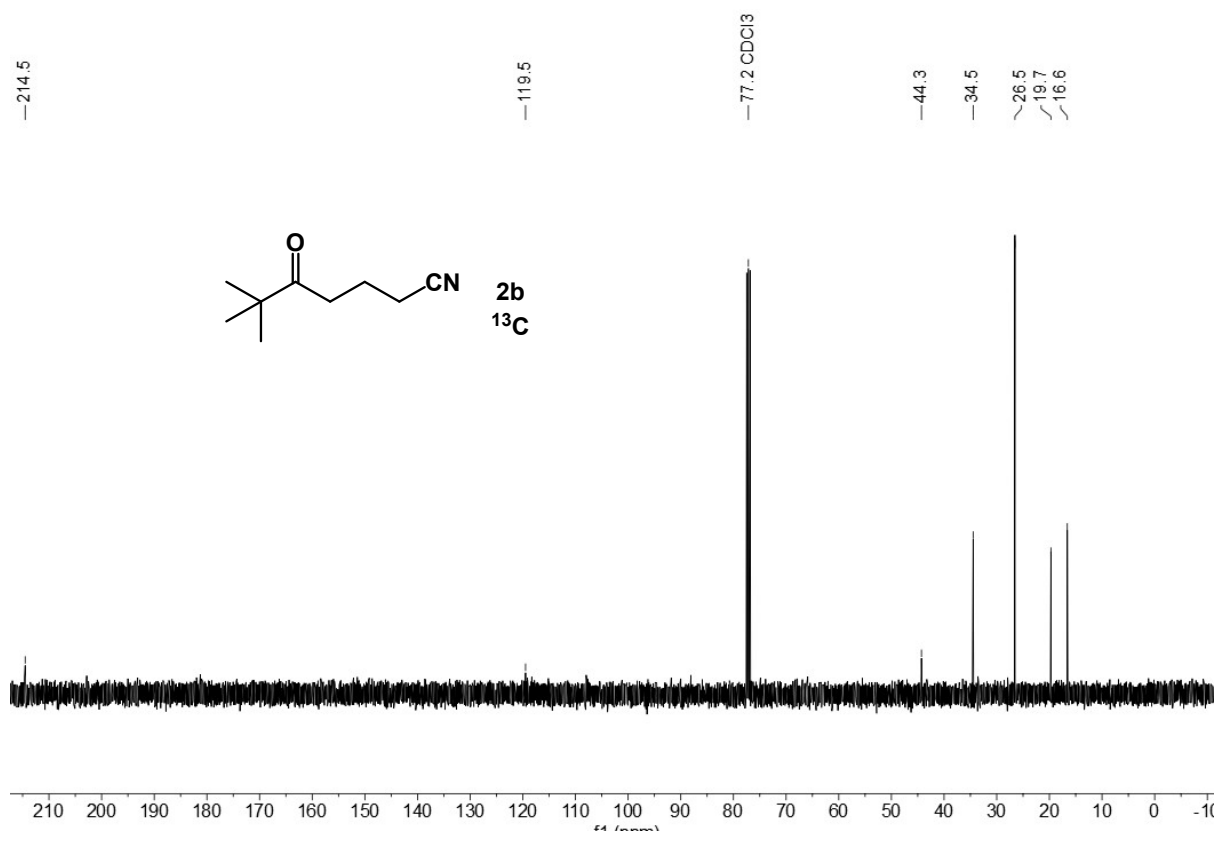

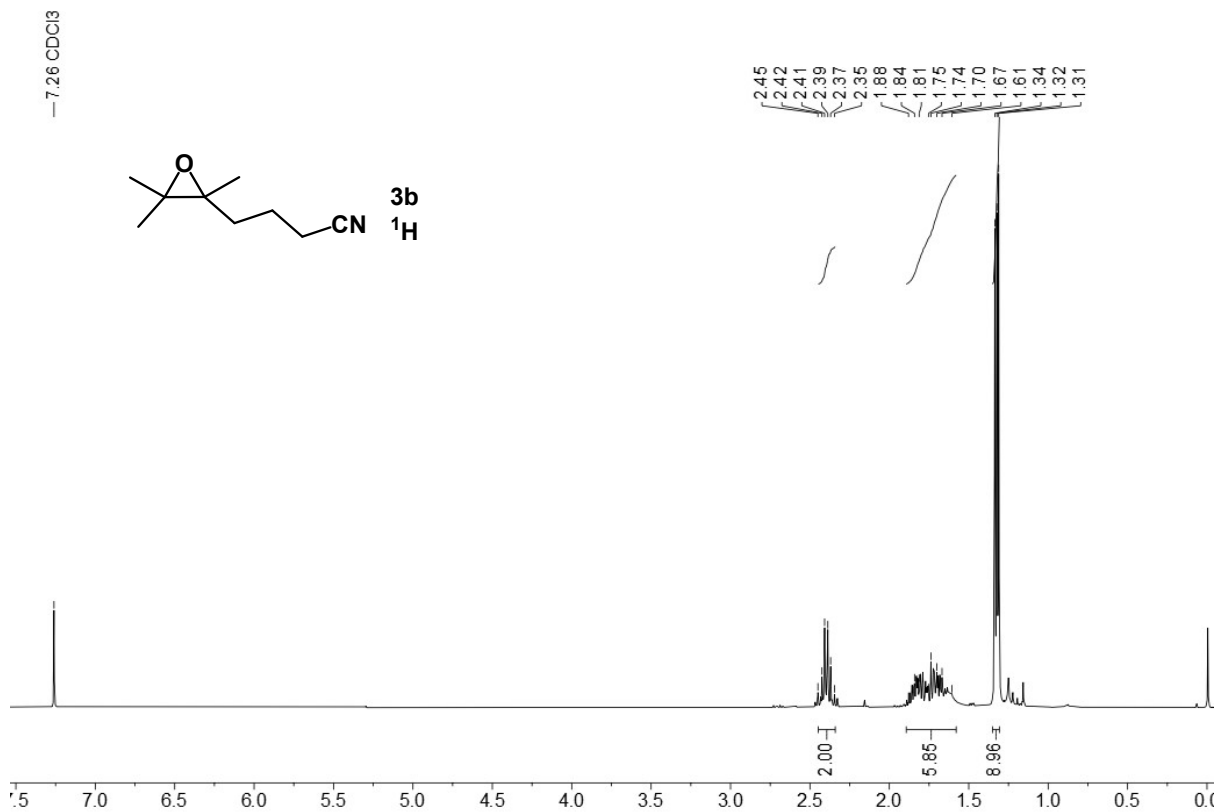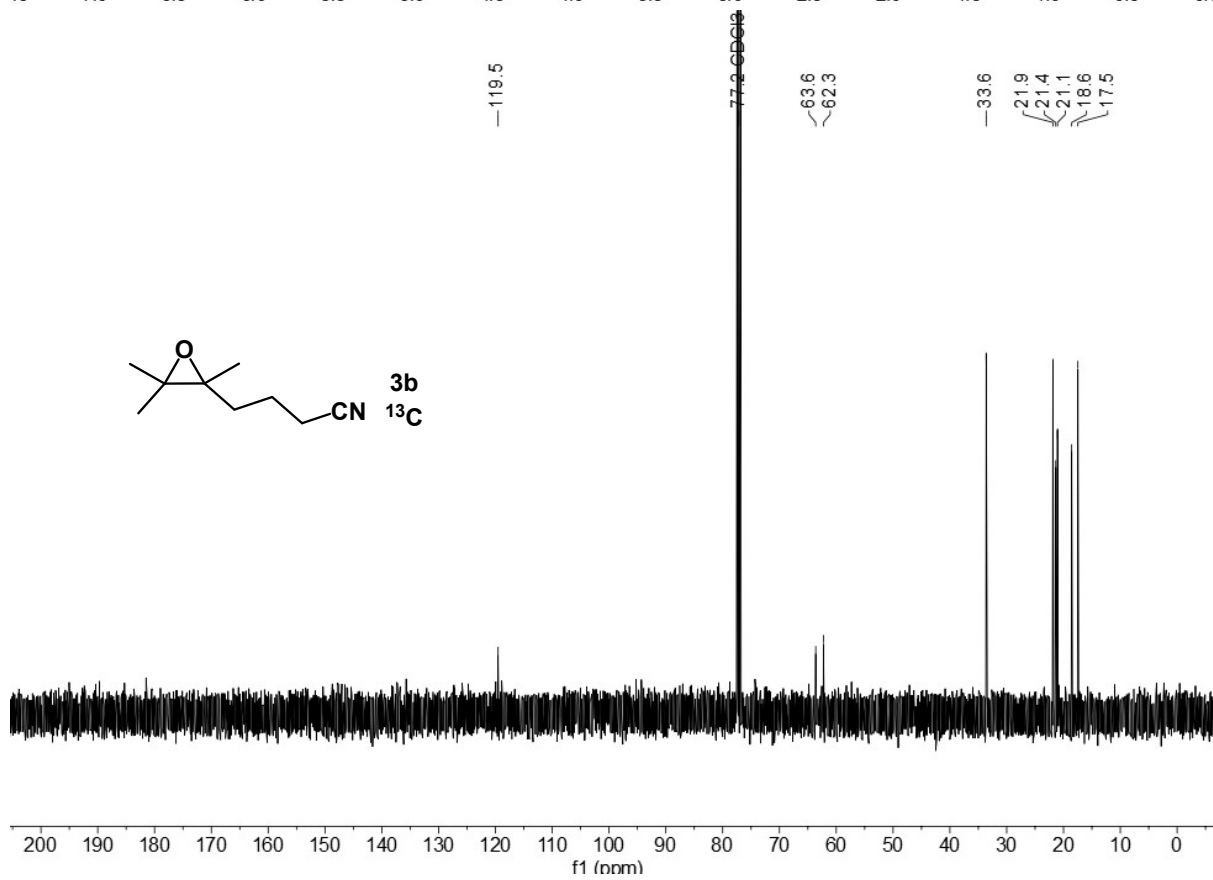

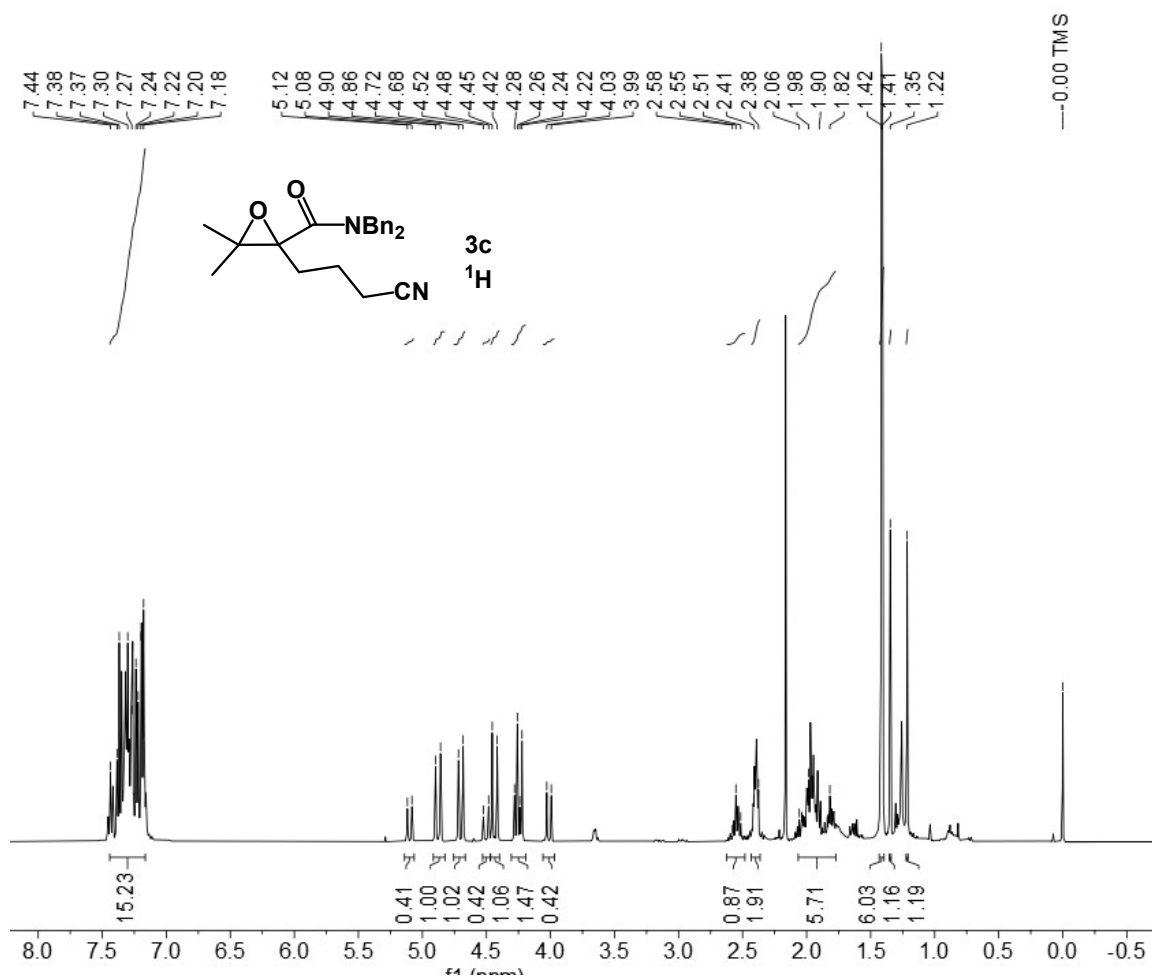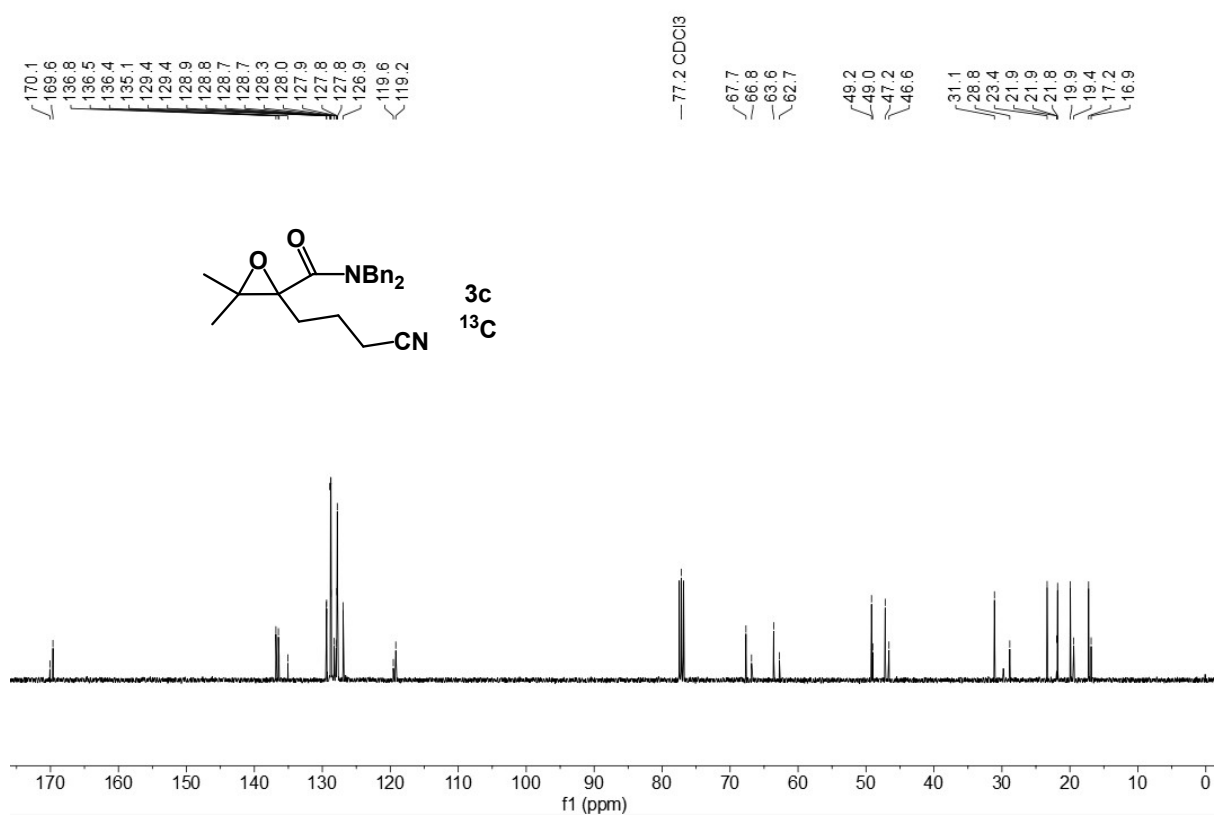



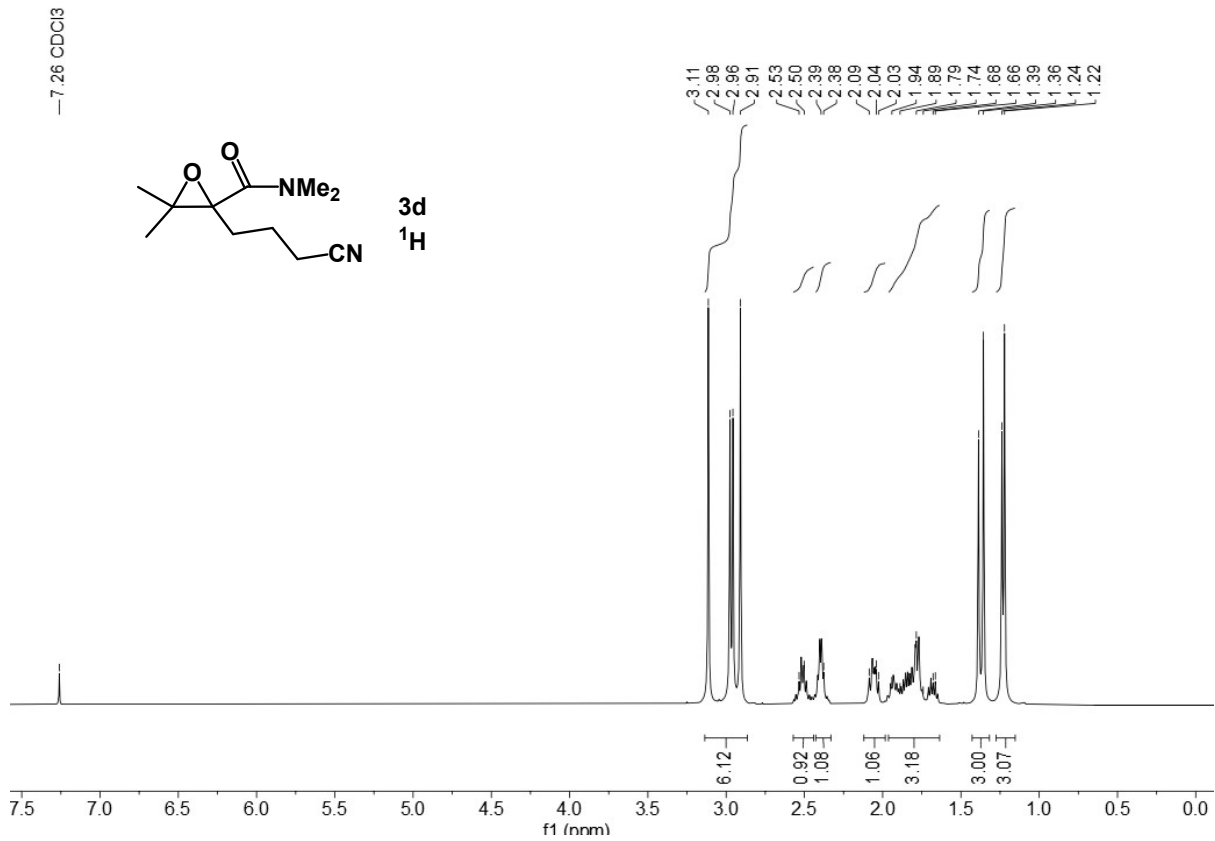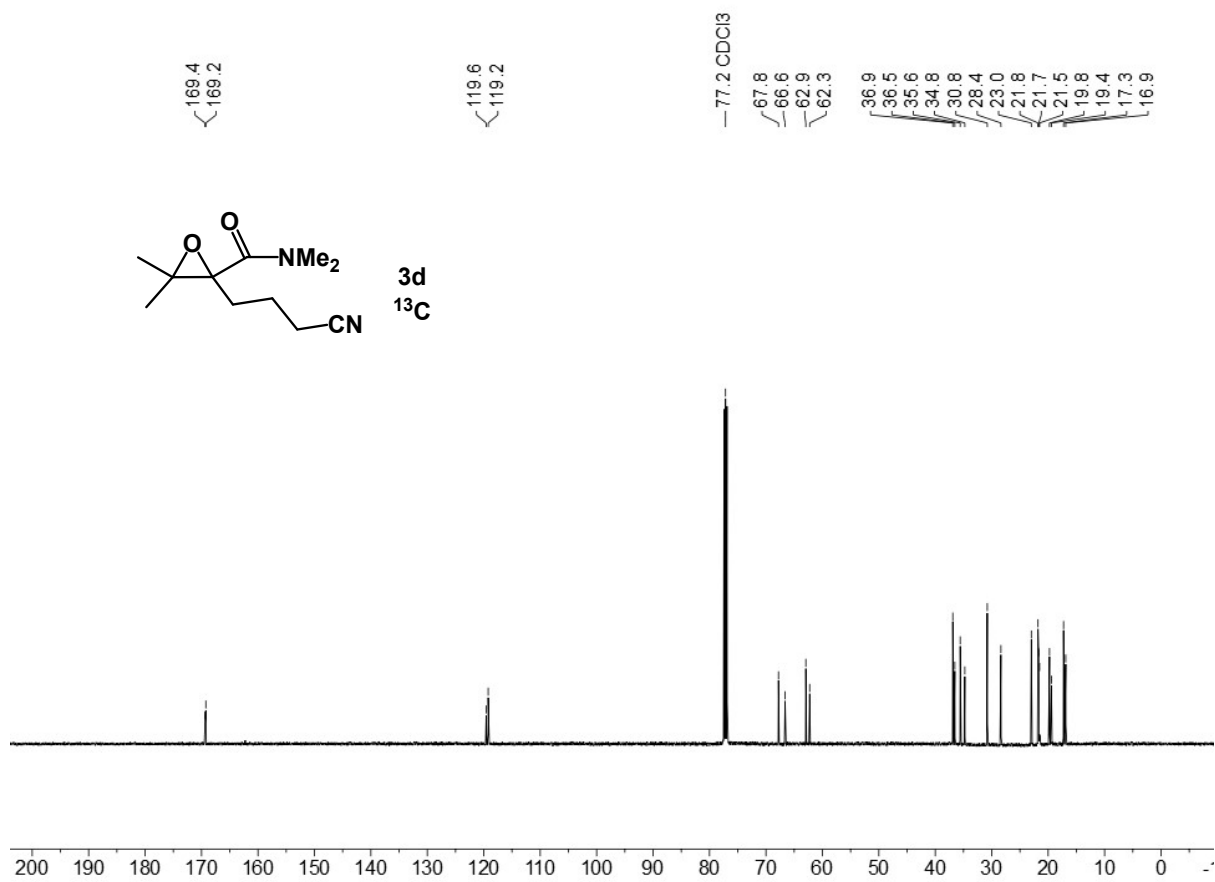

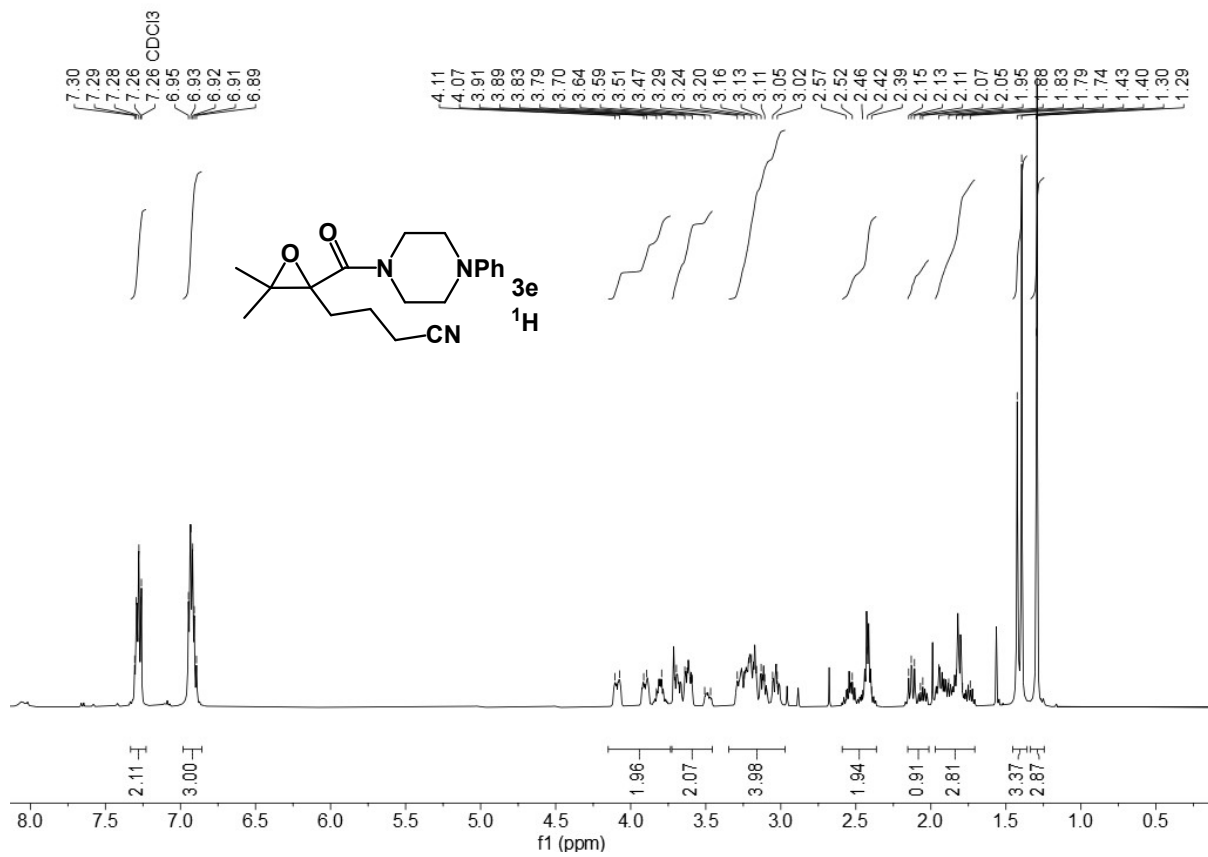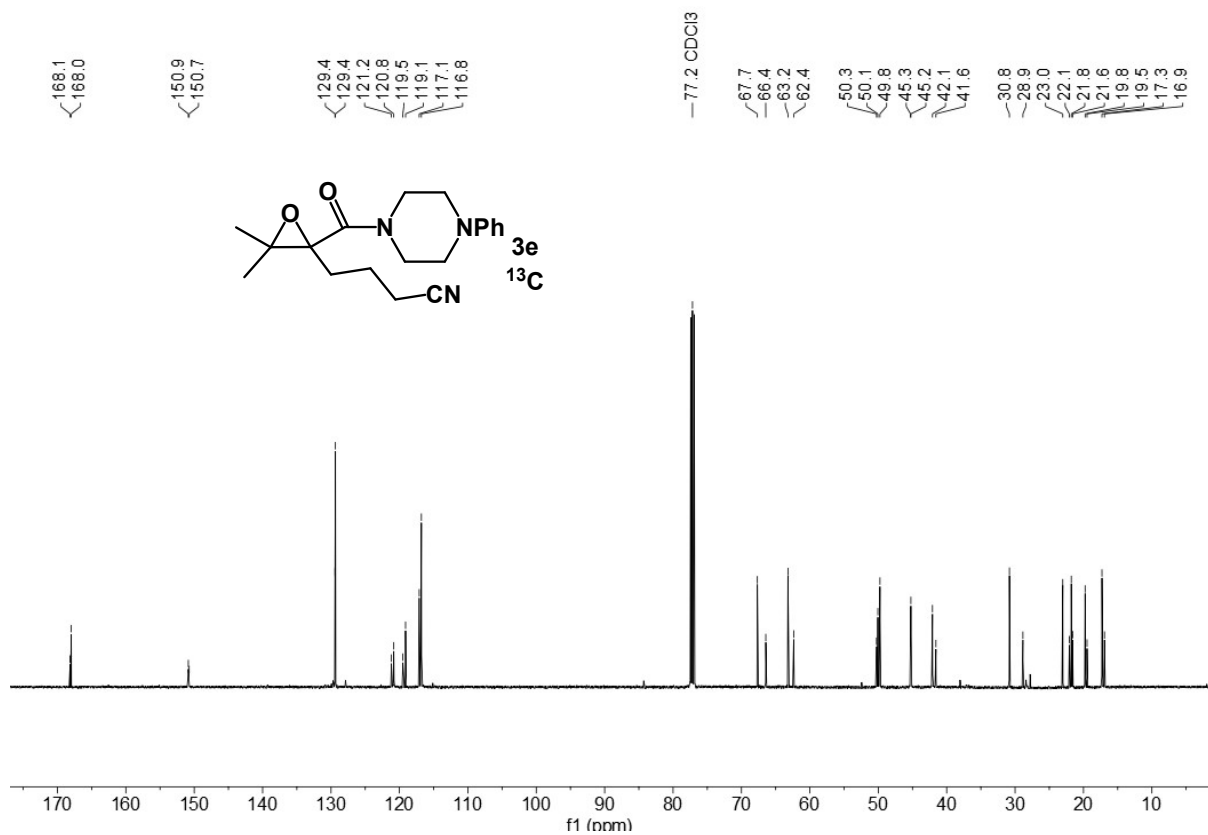

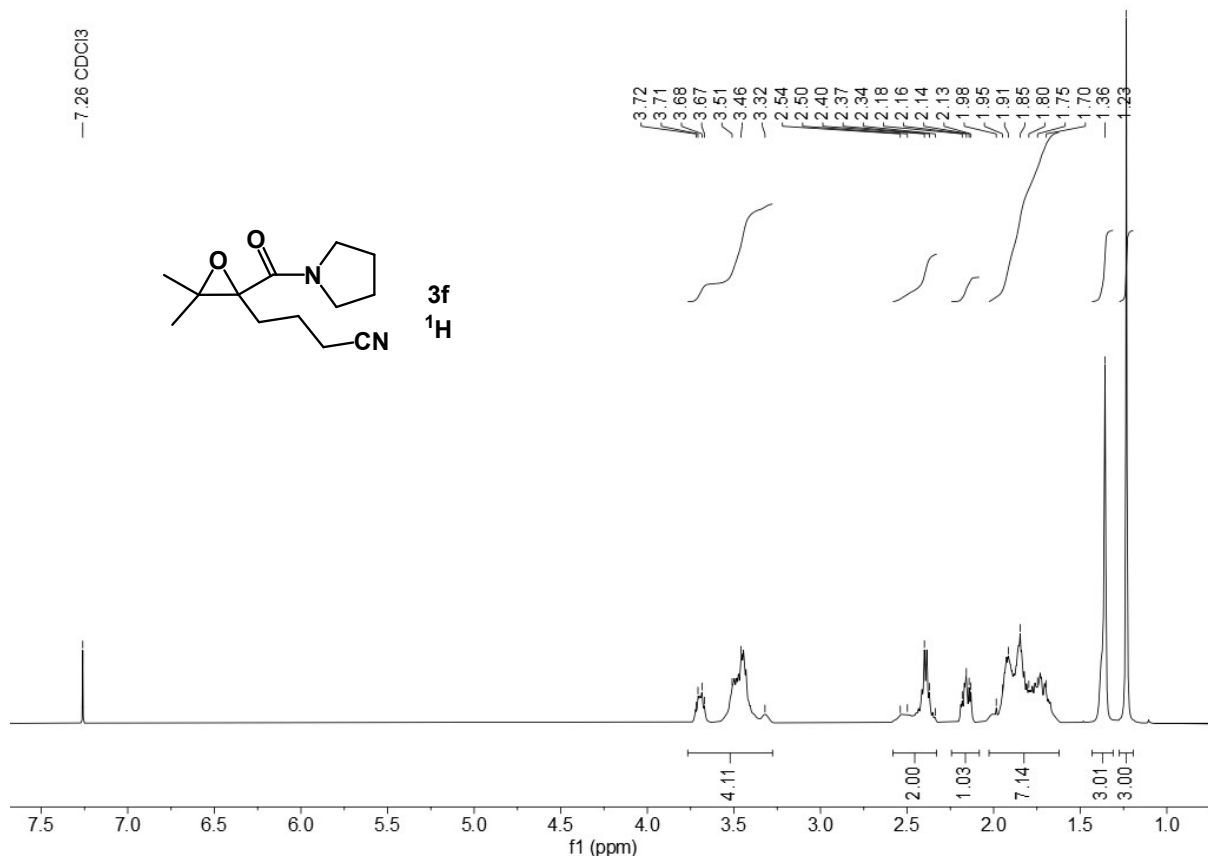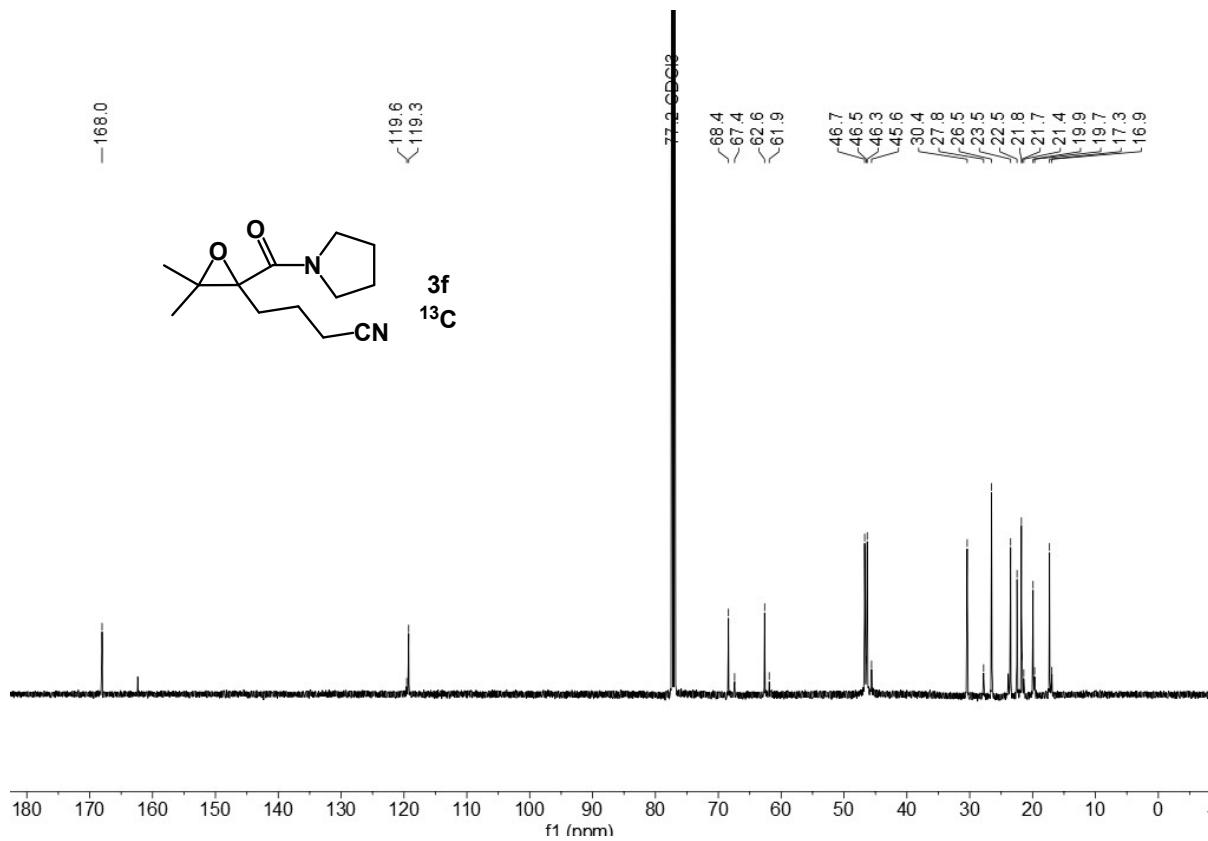

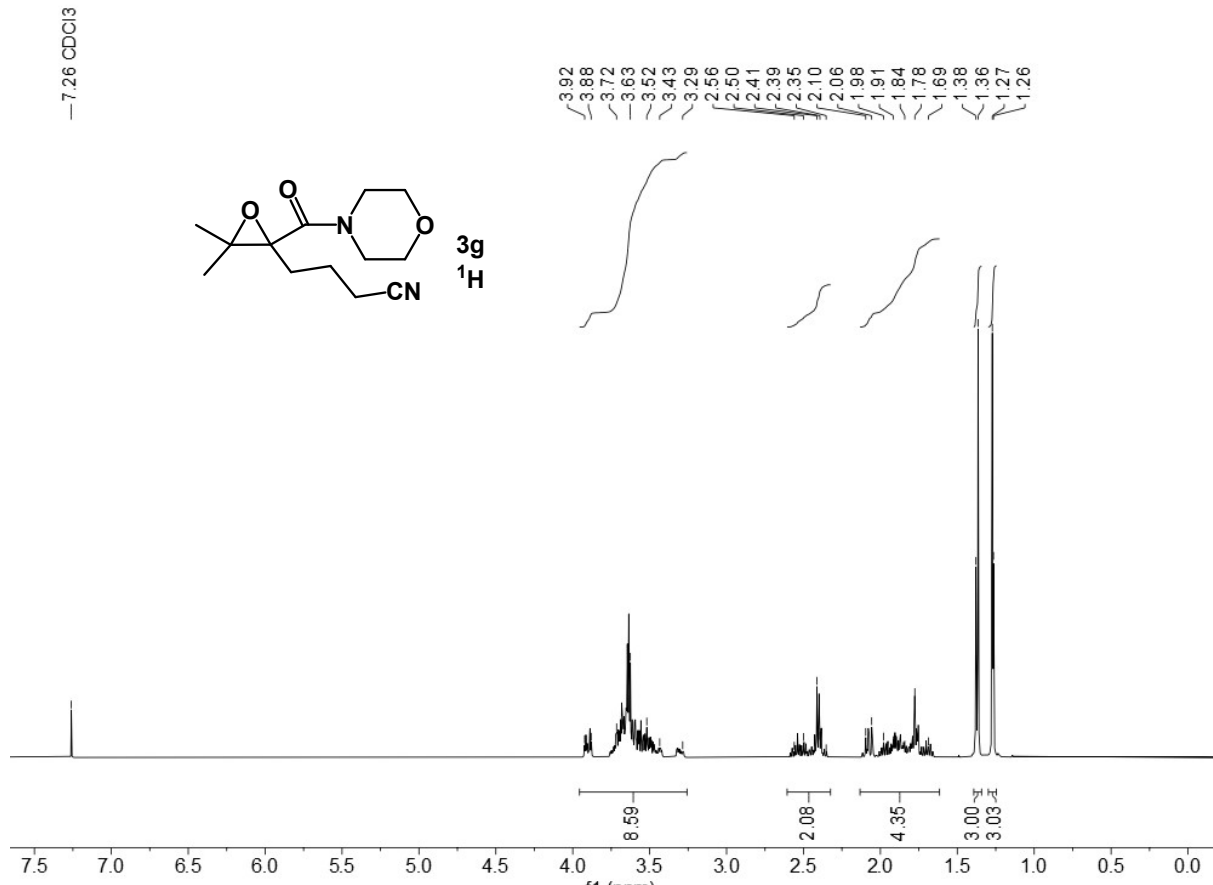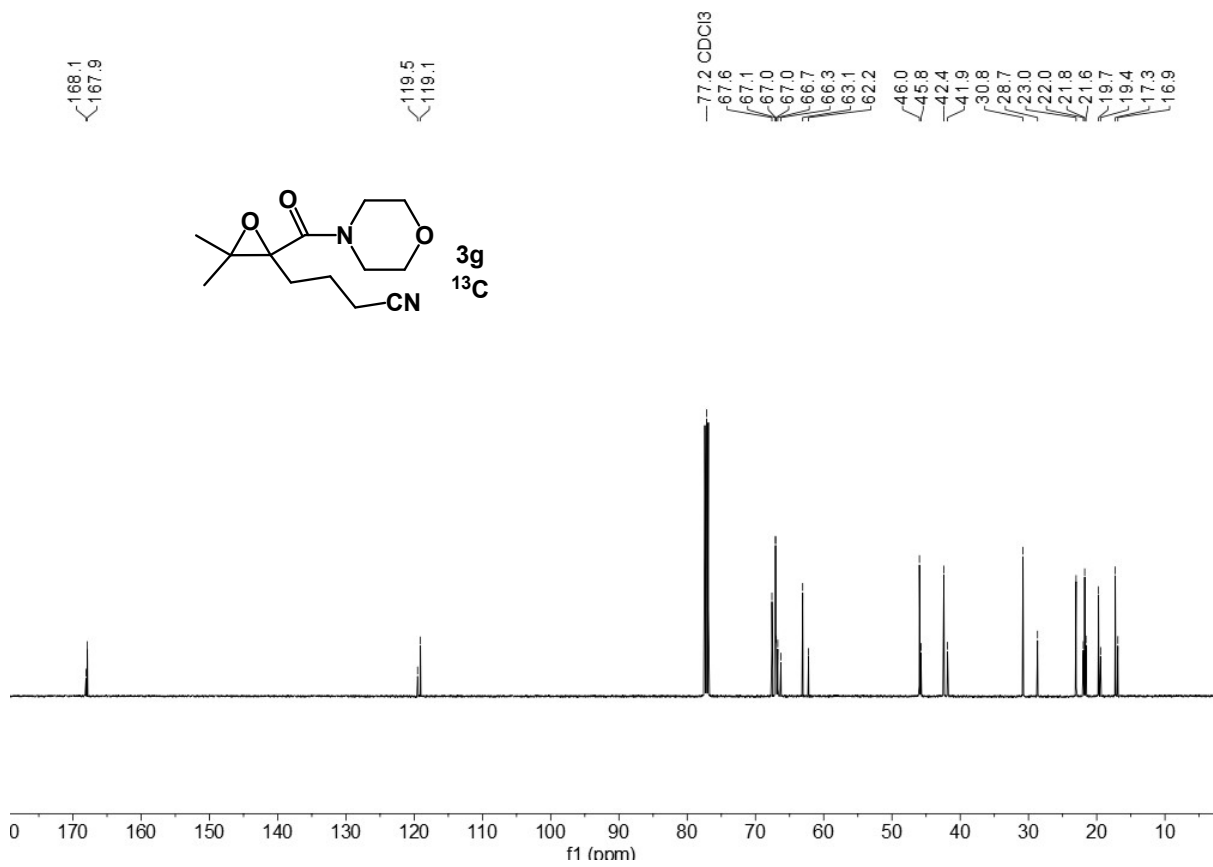

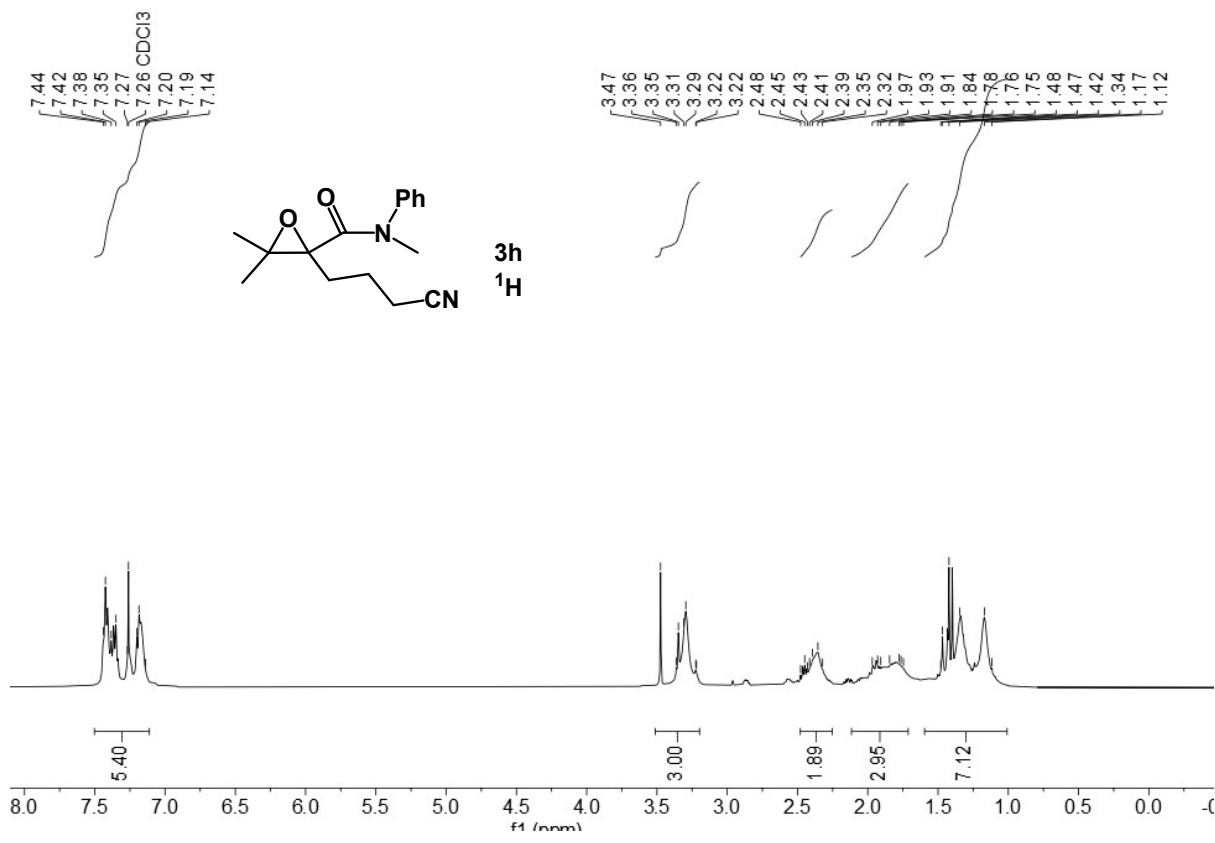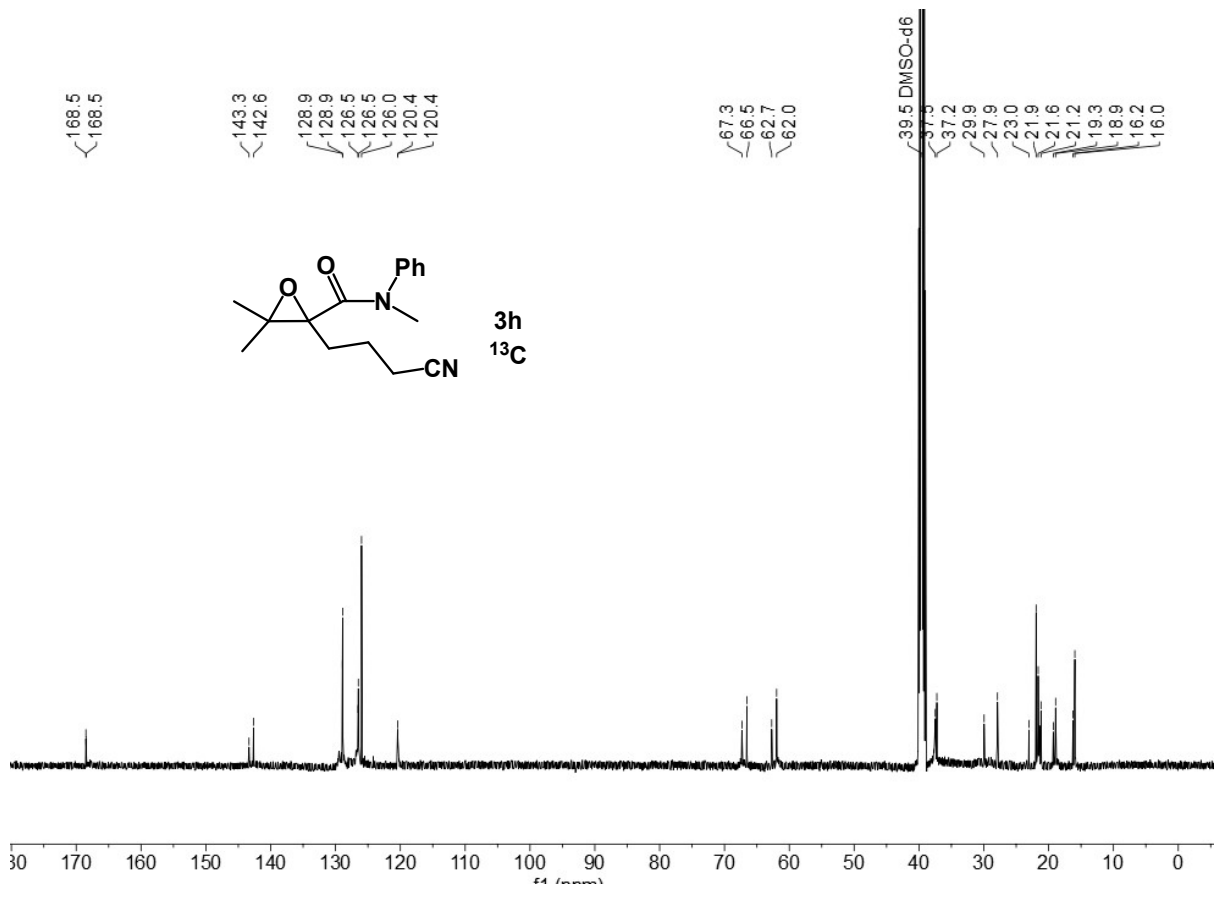

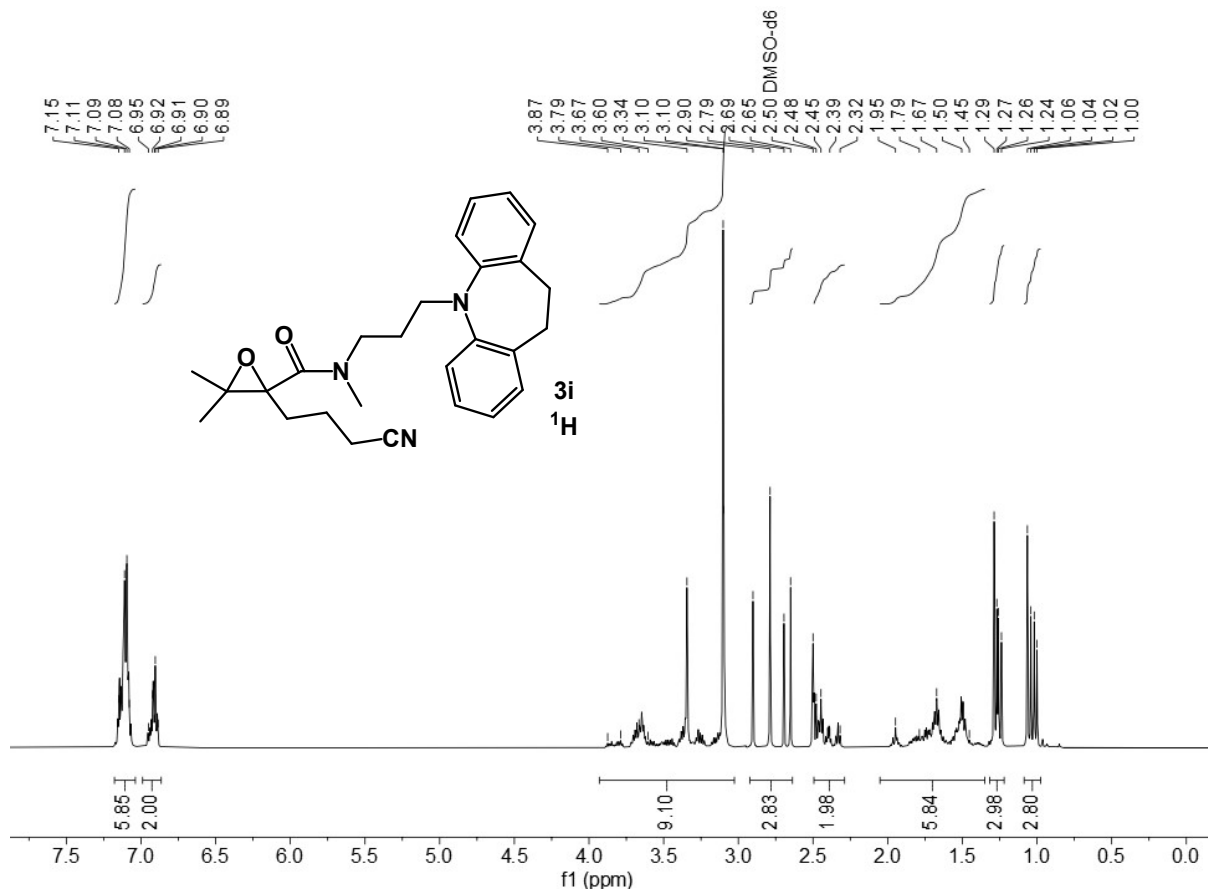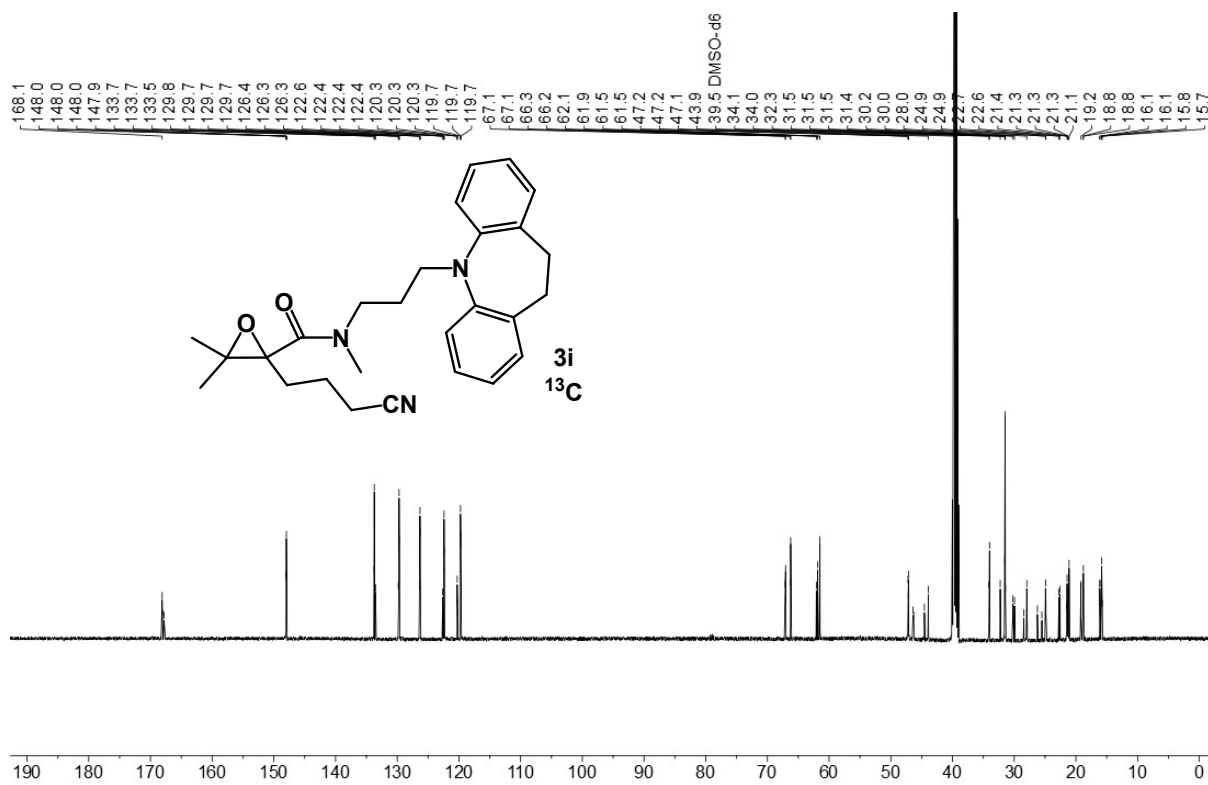

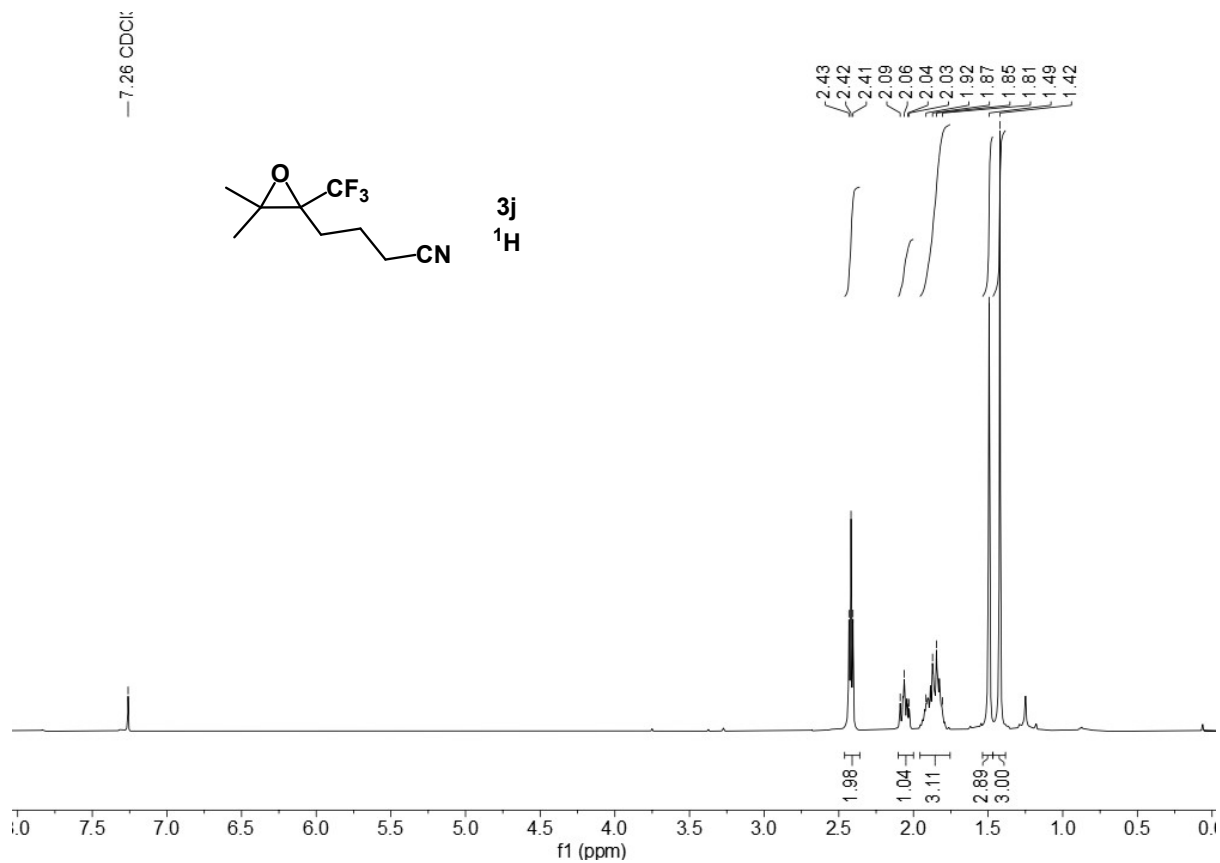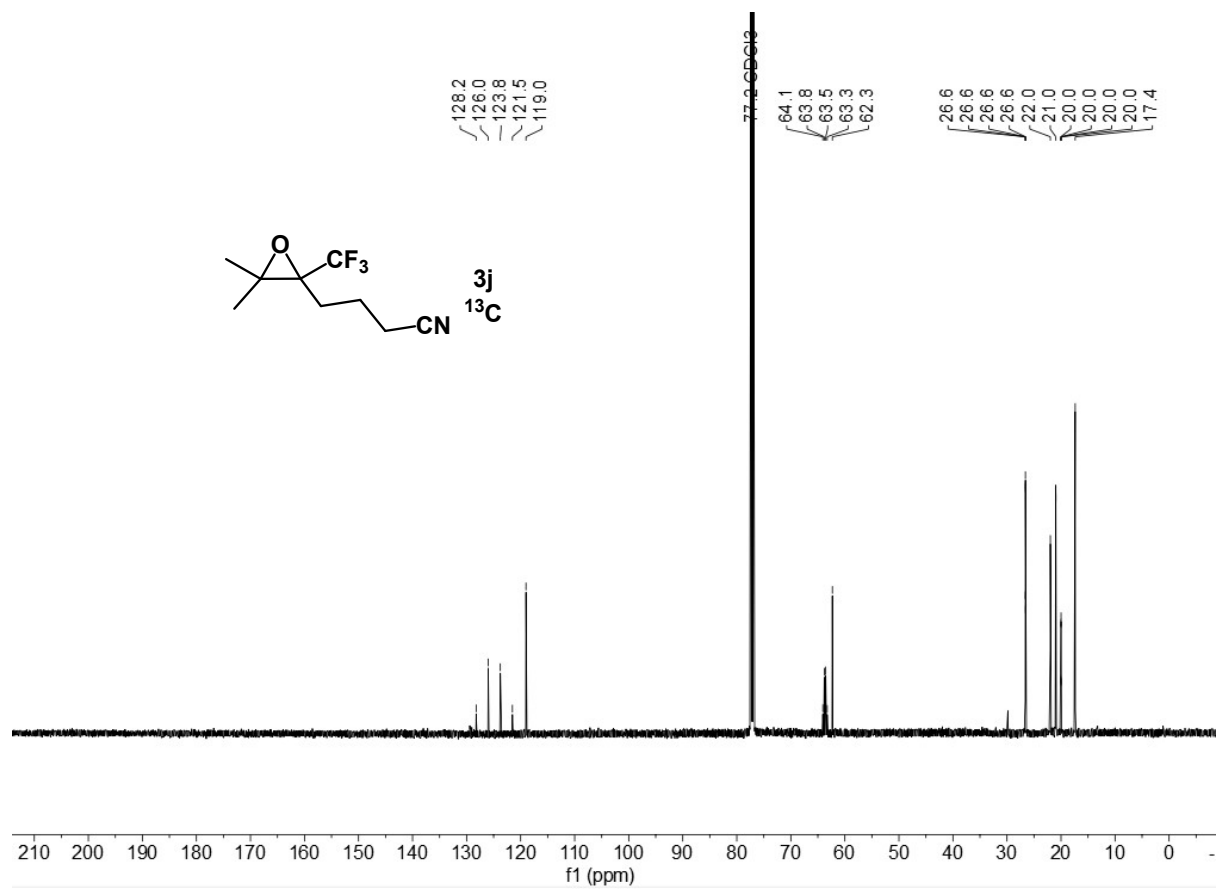

—67.12

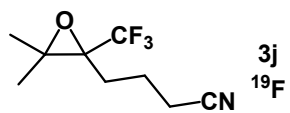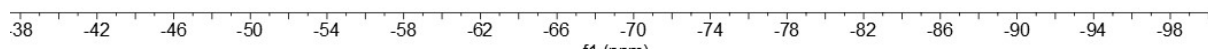



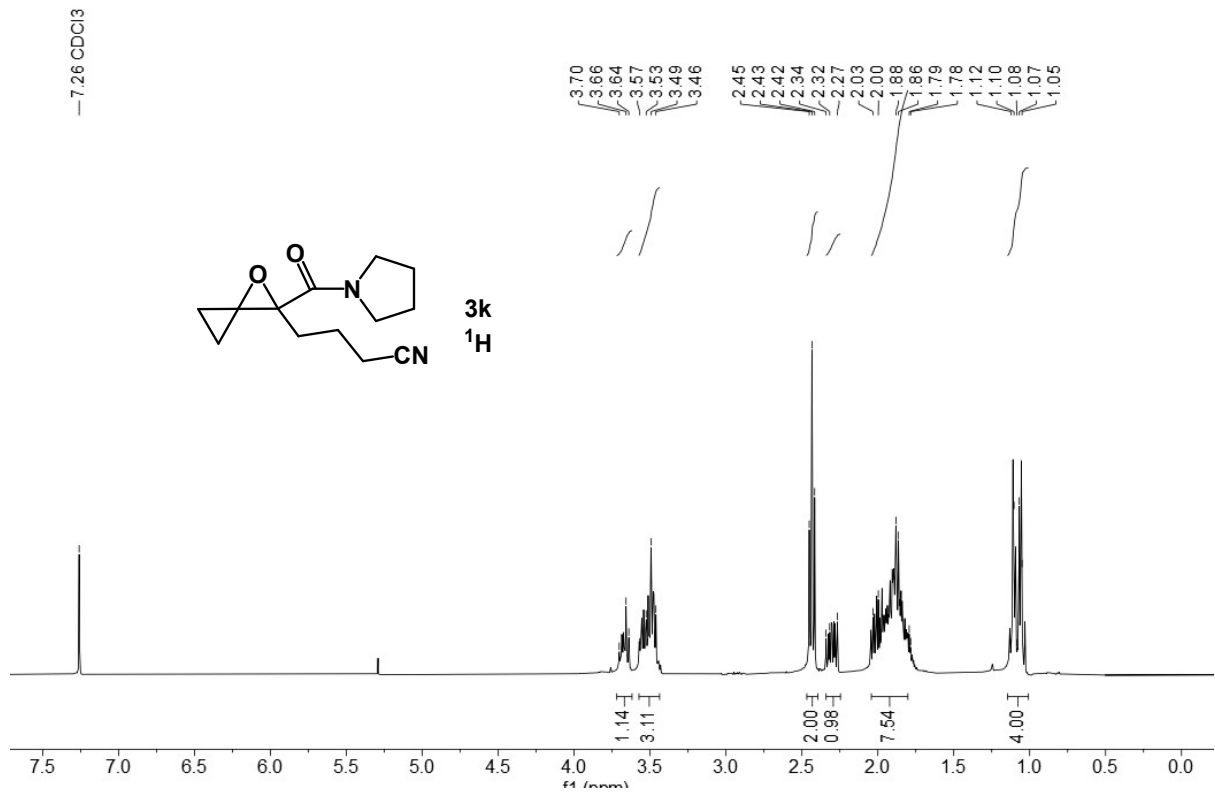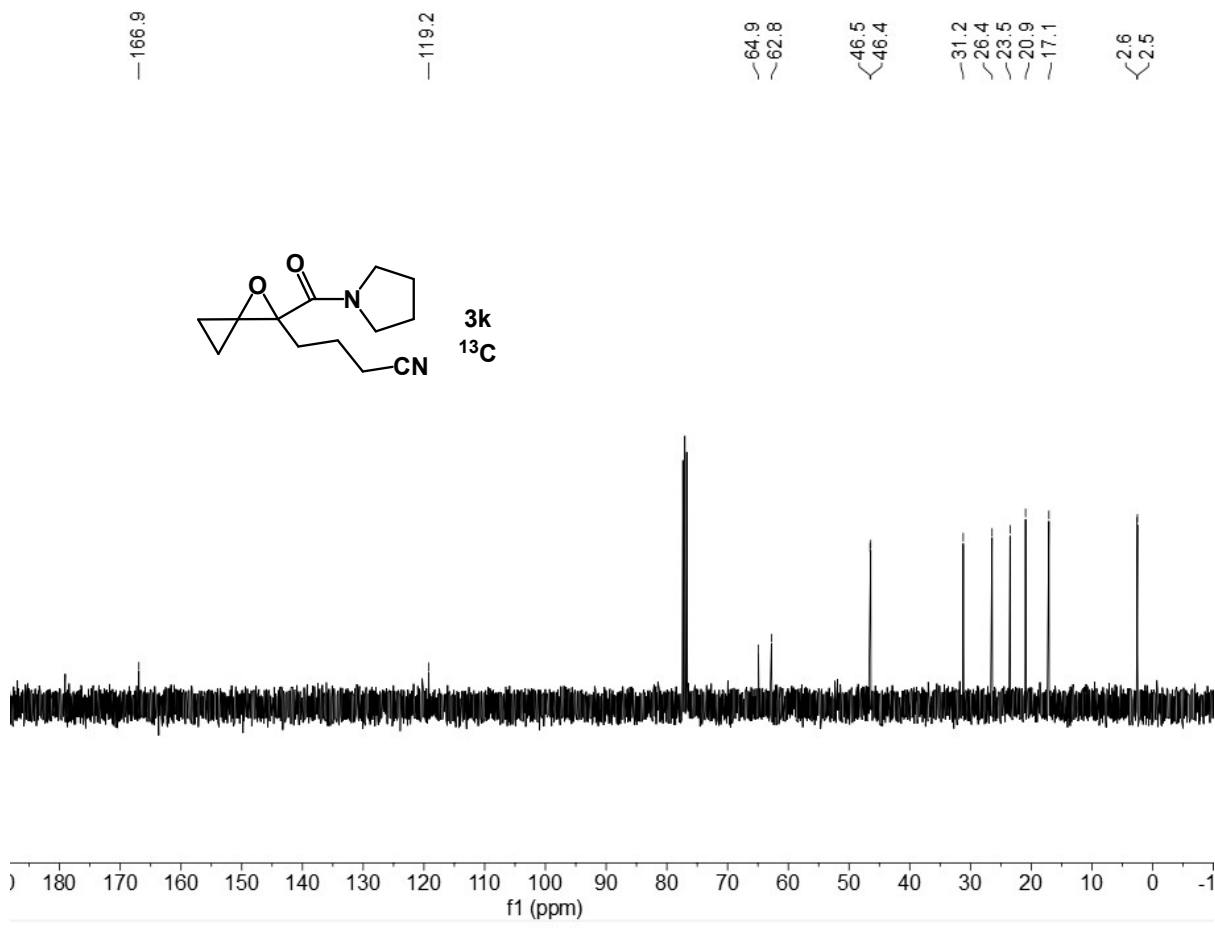

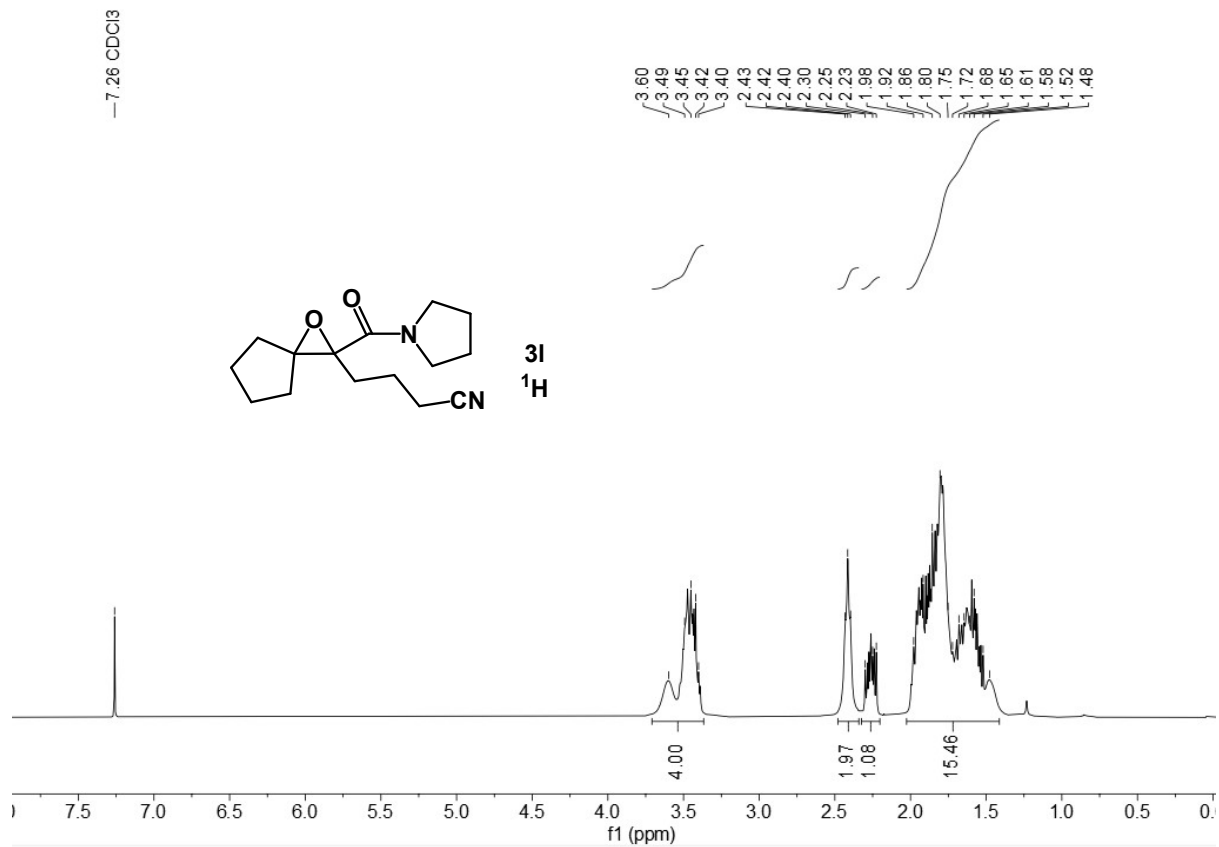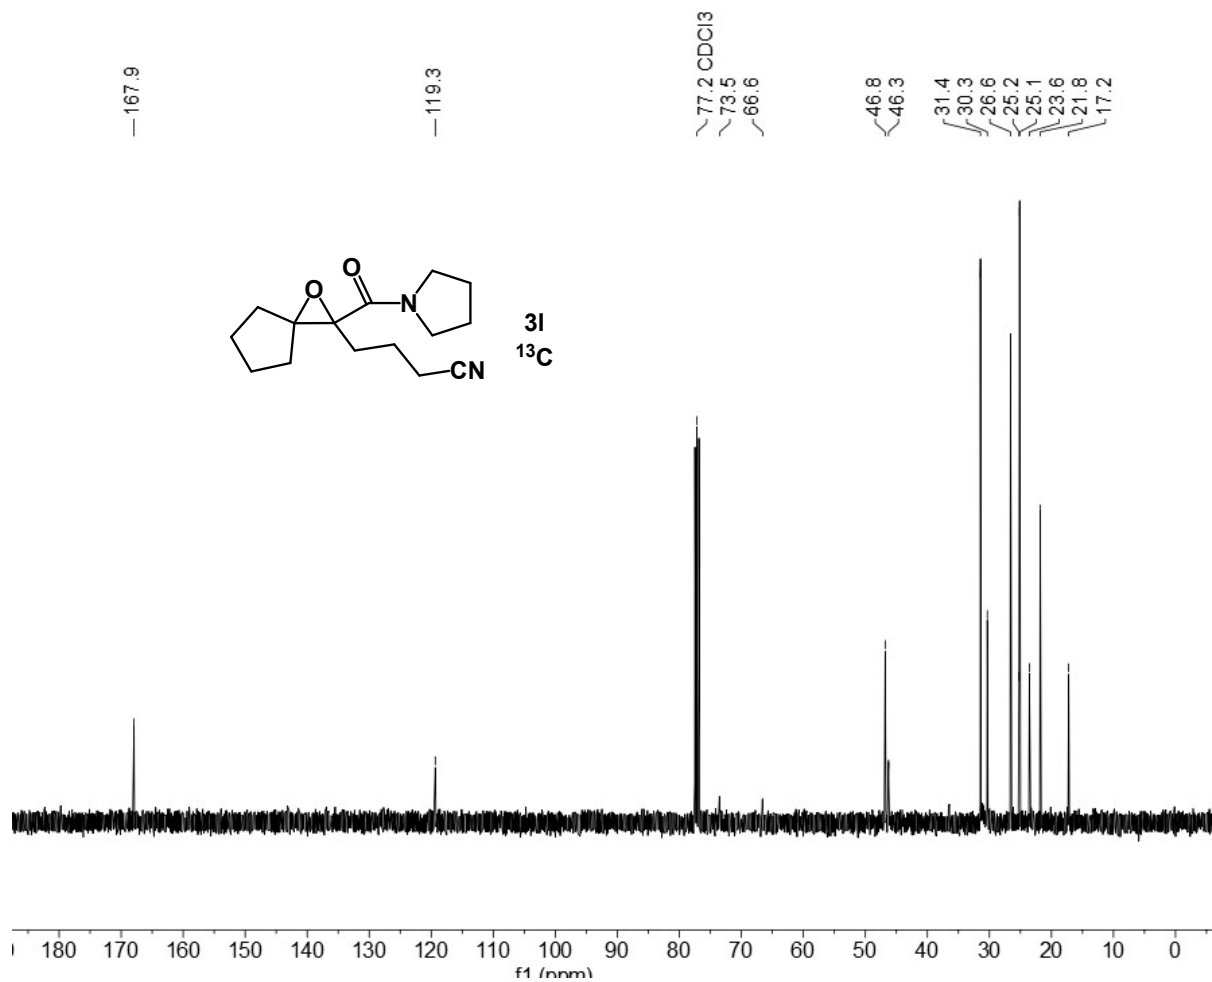



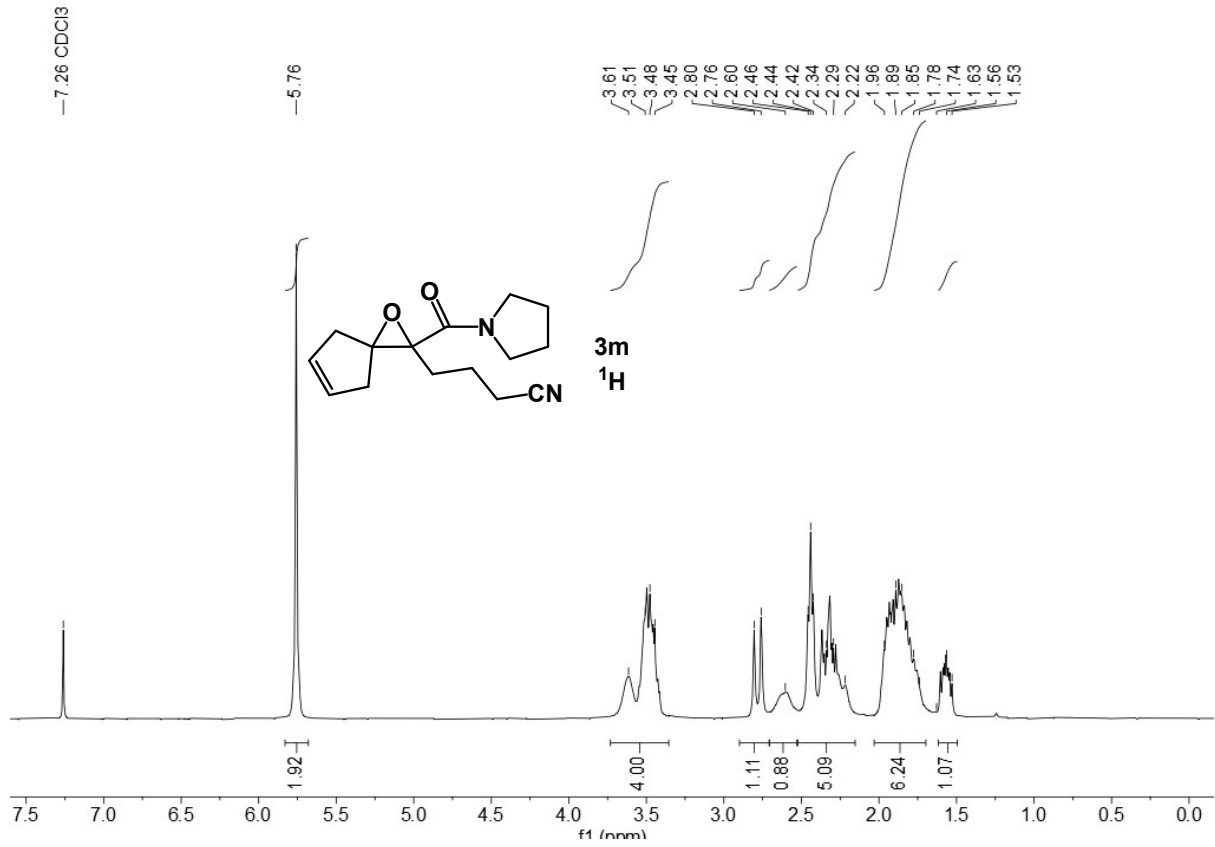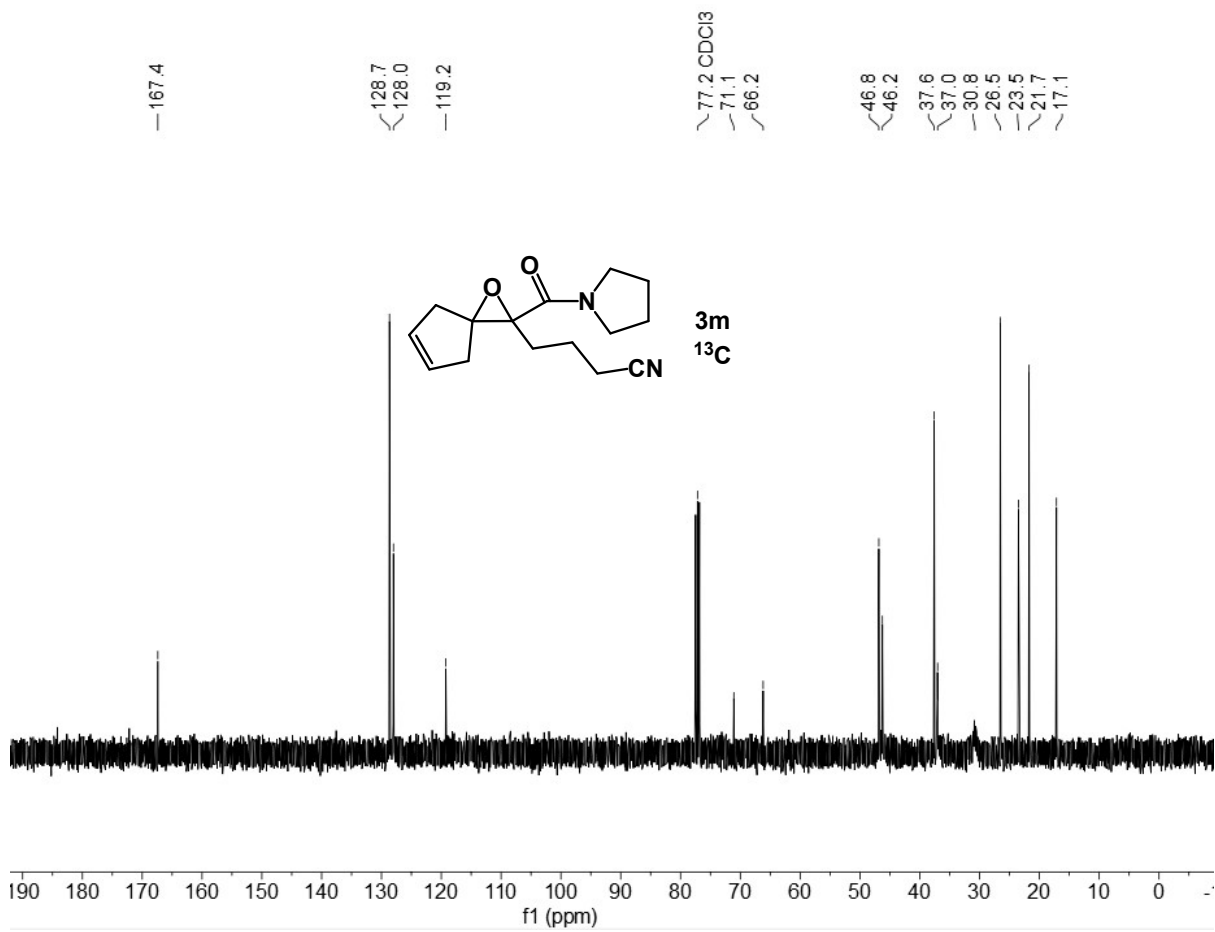

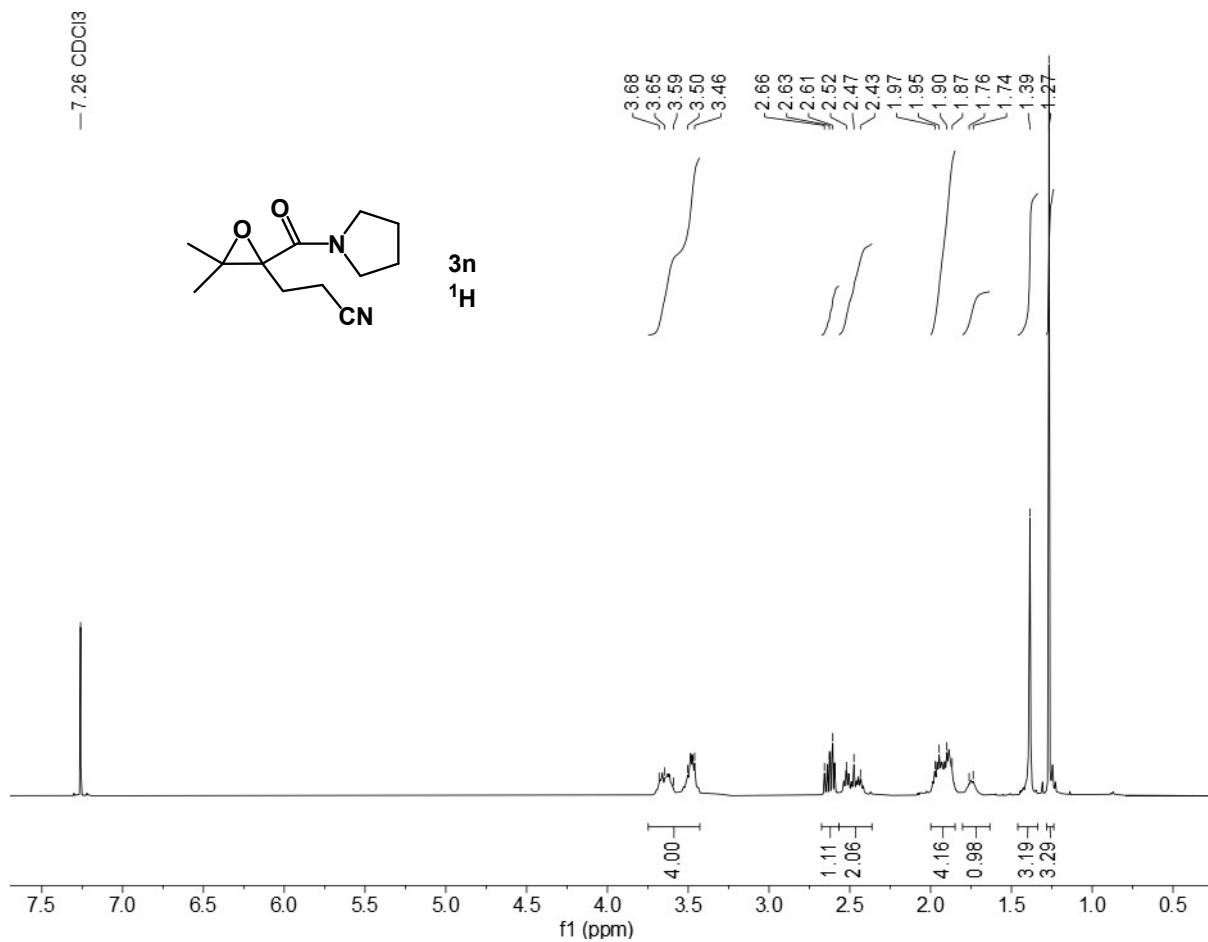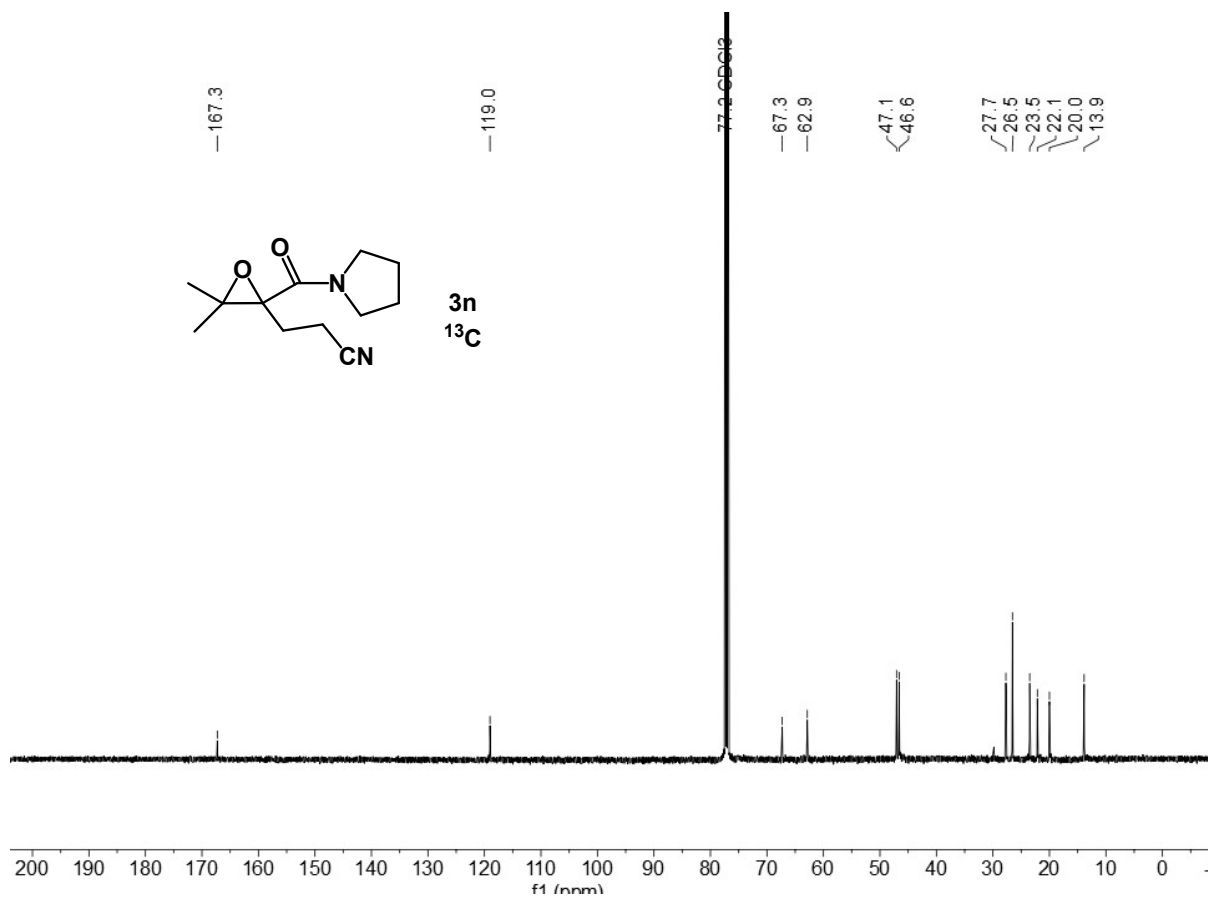



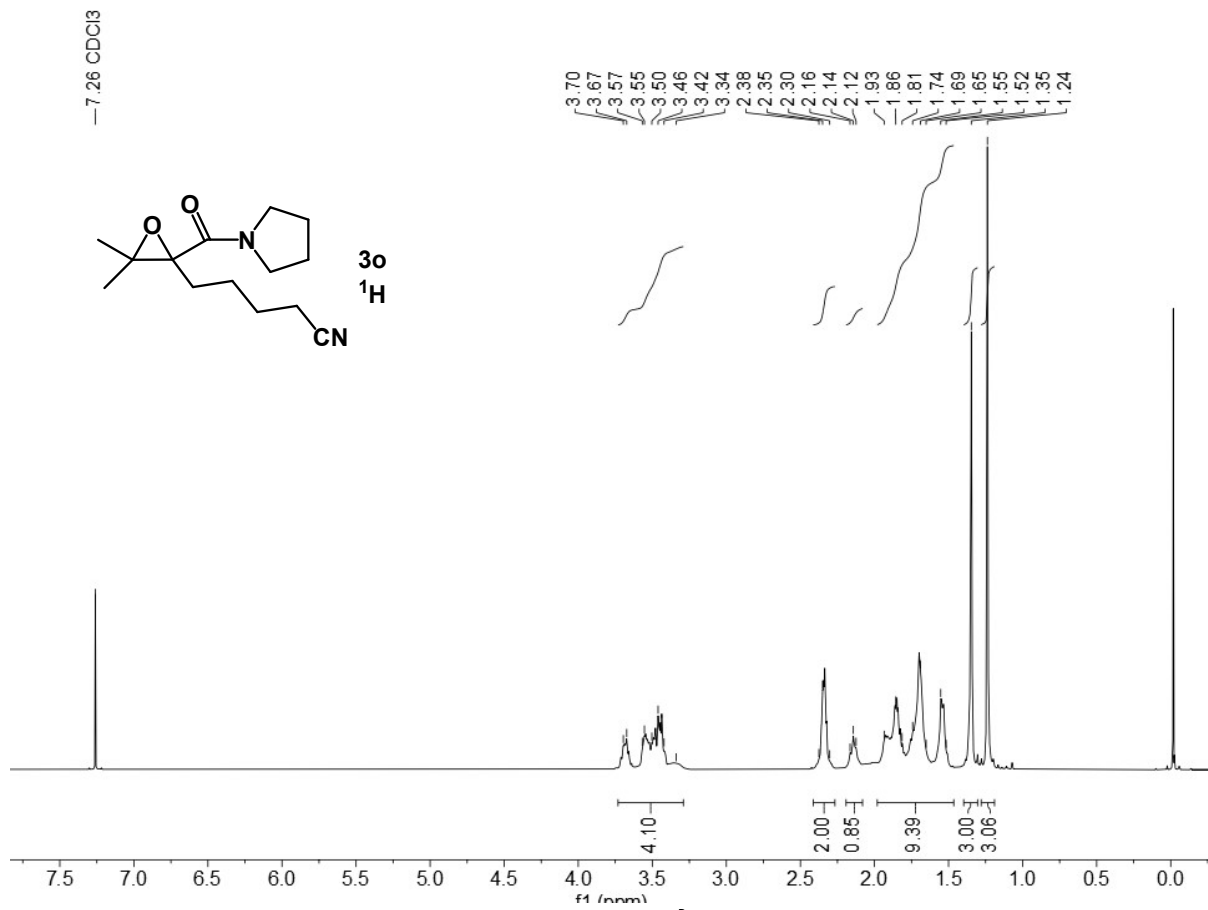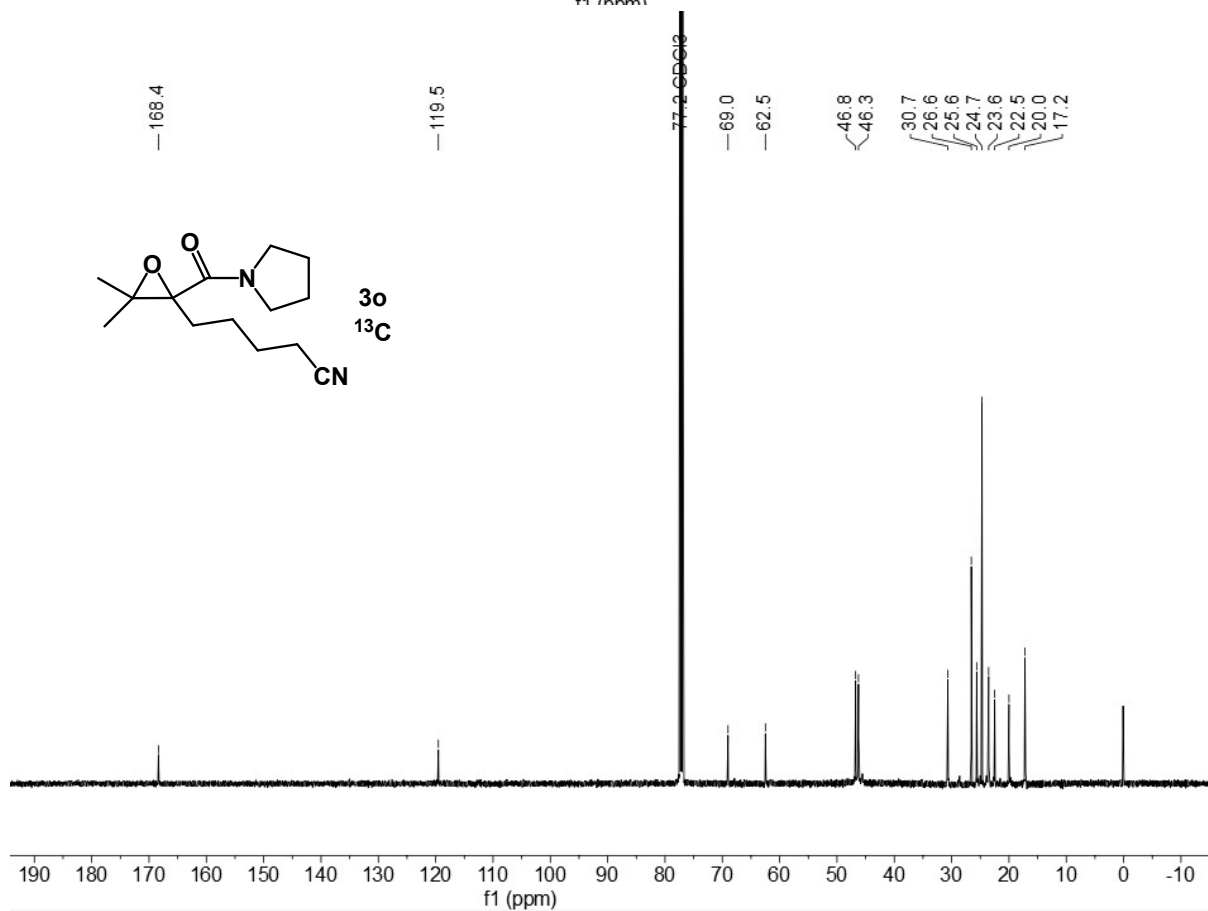

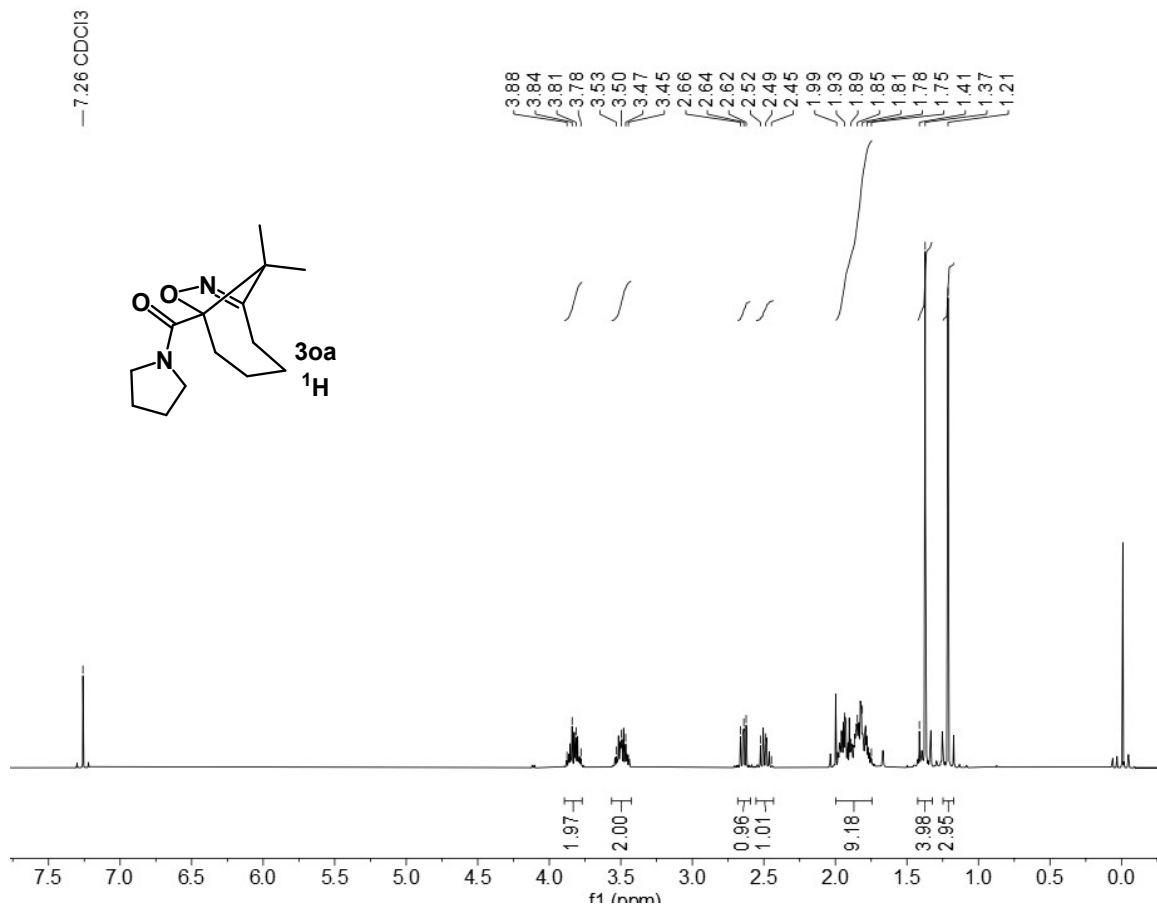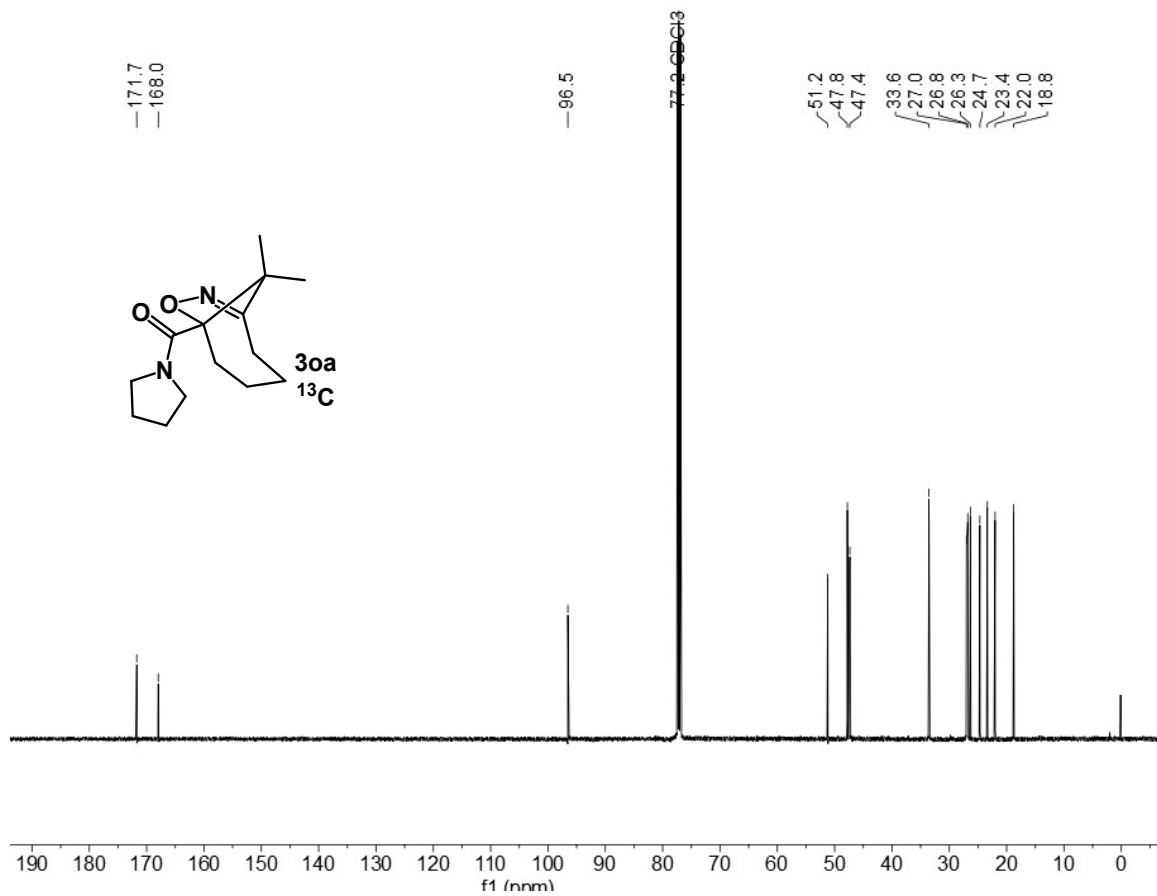



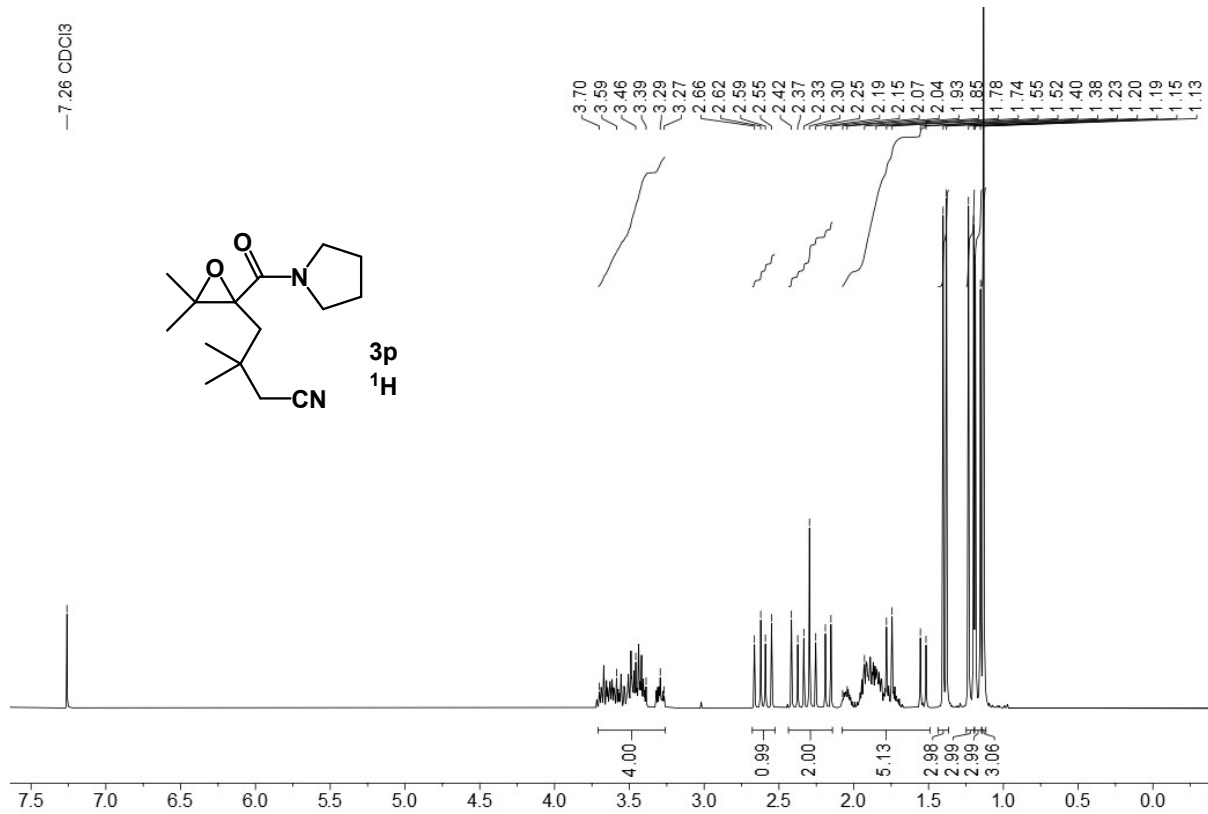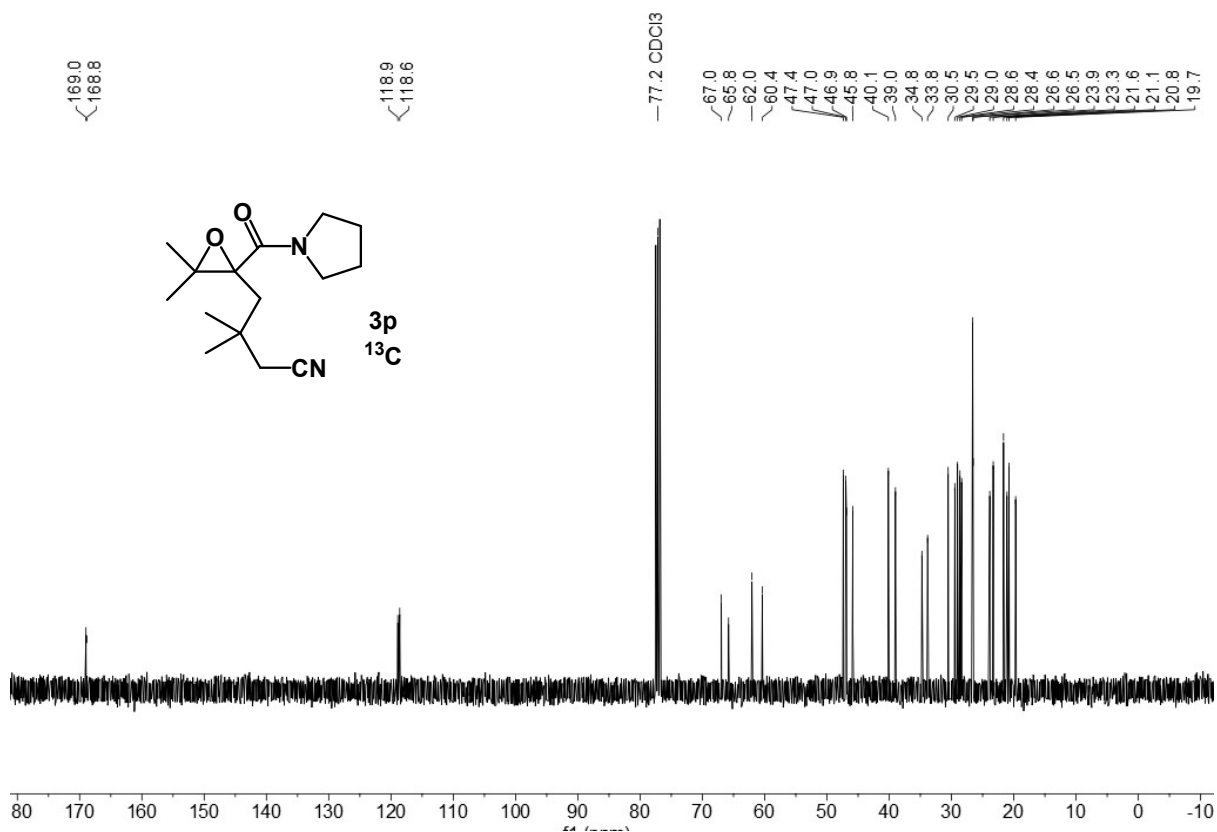

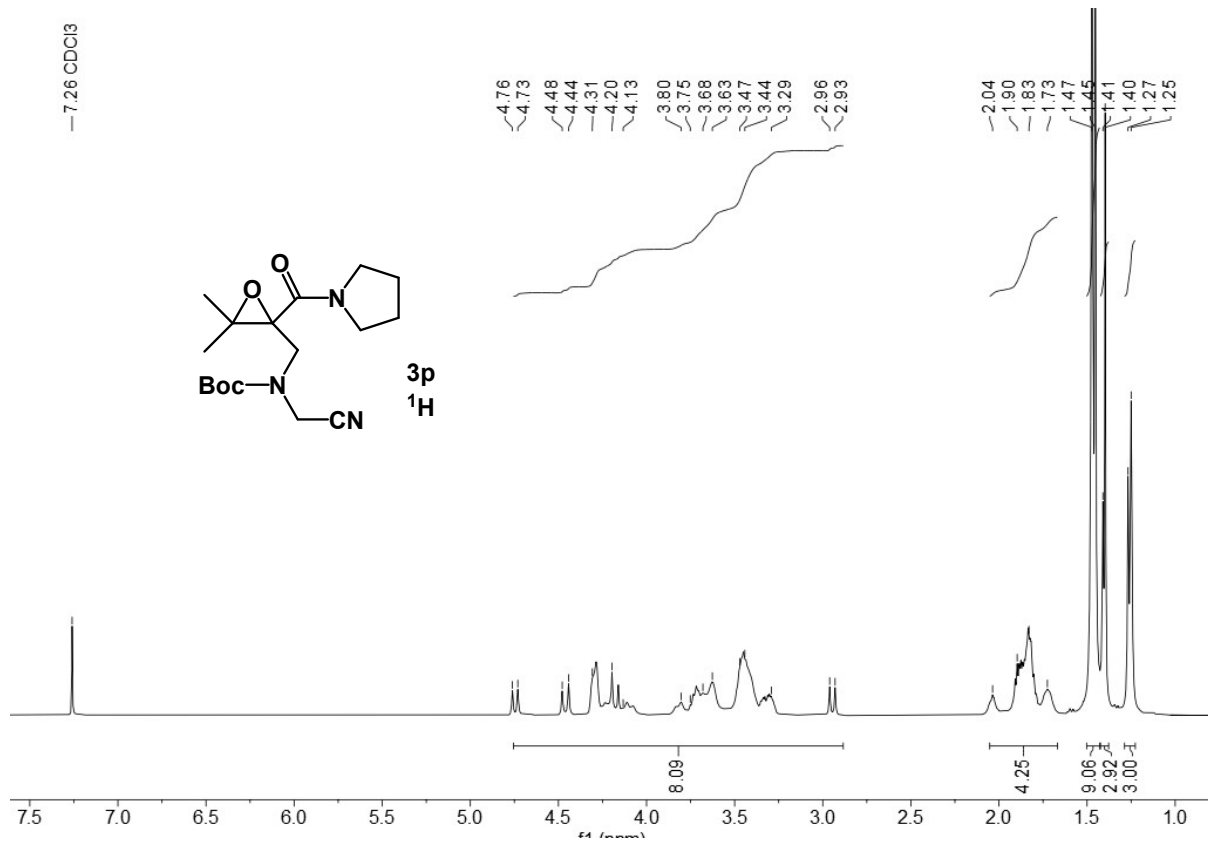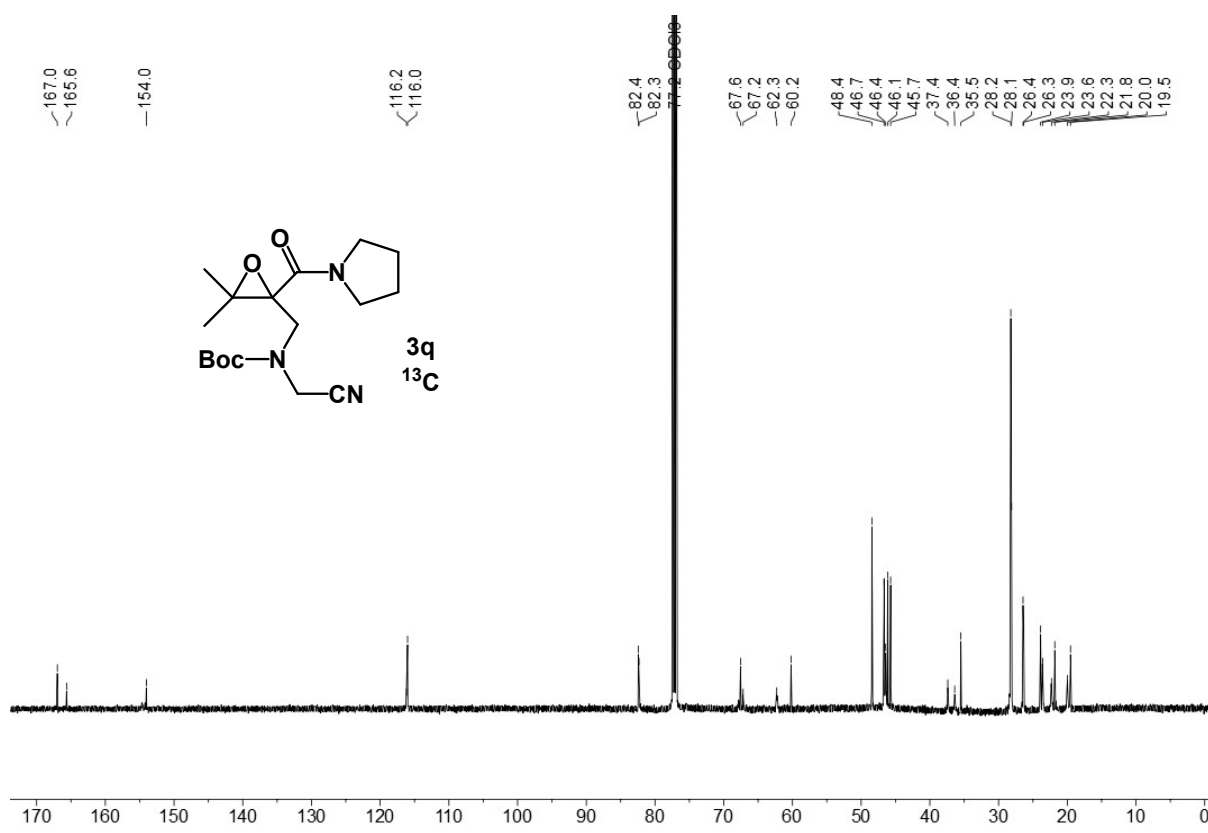

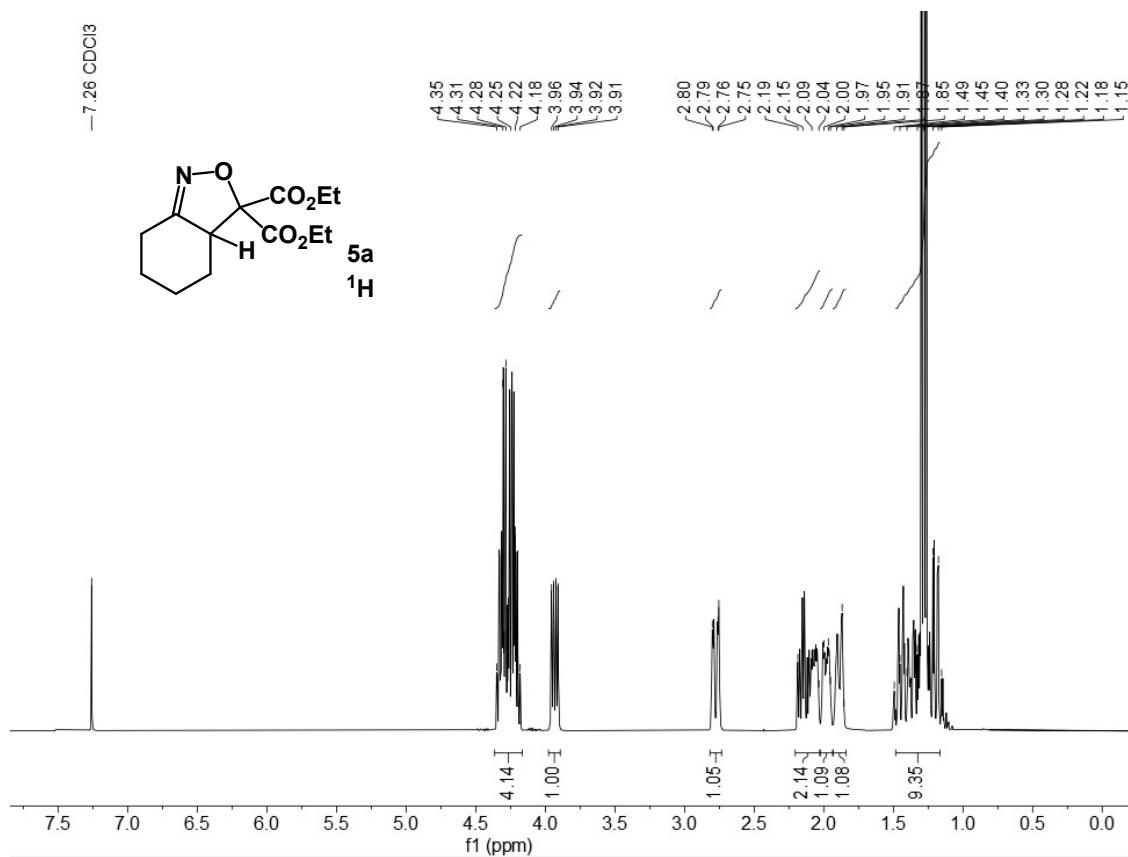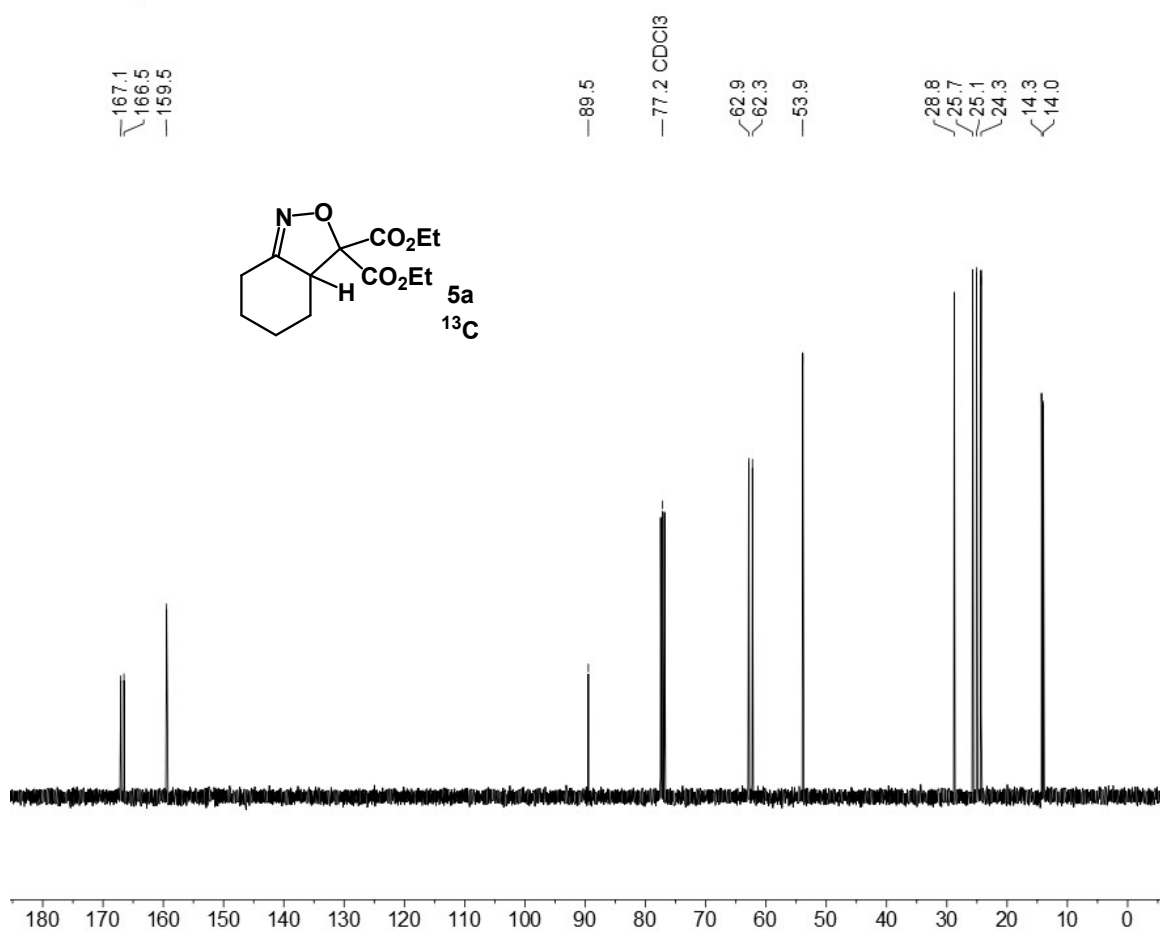

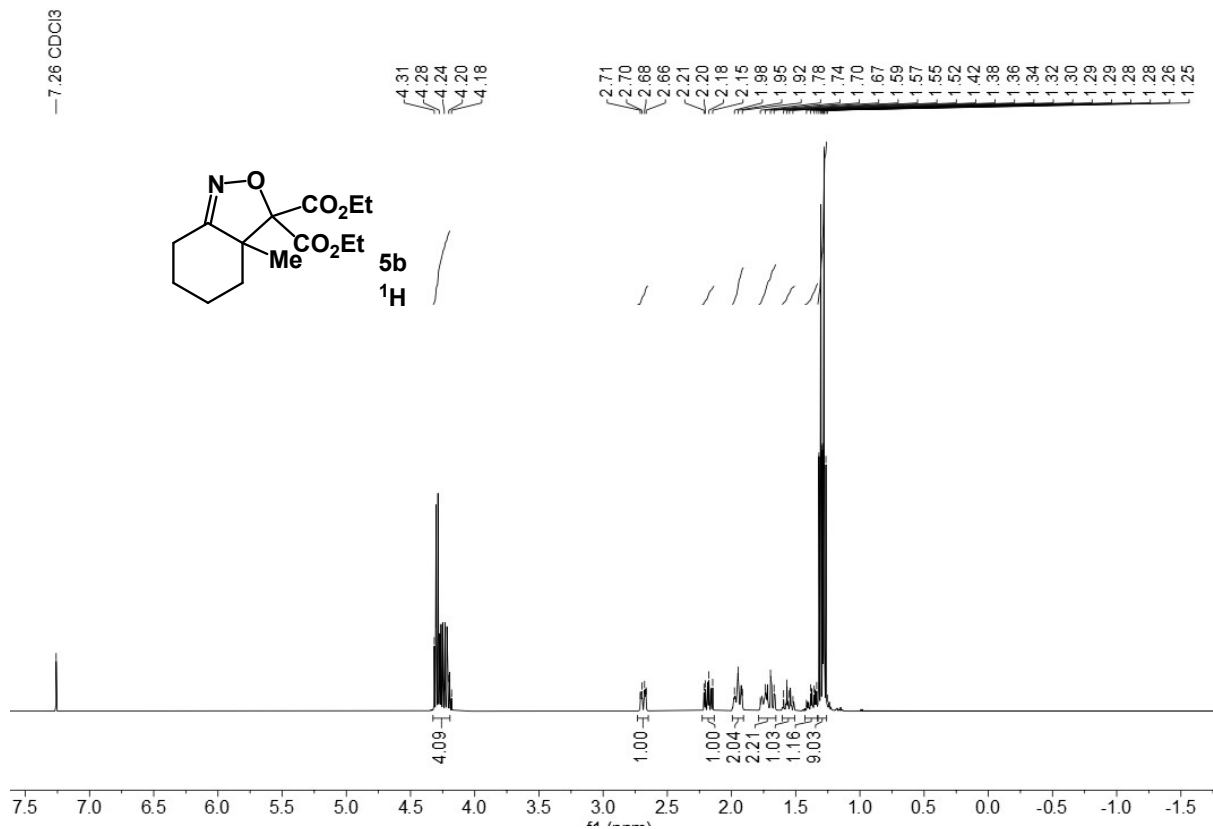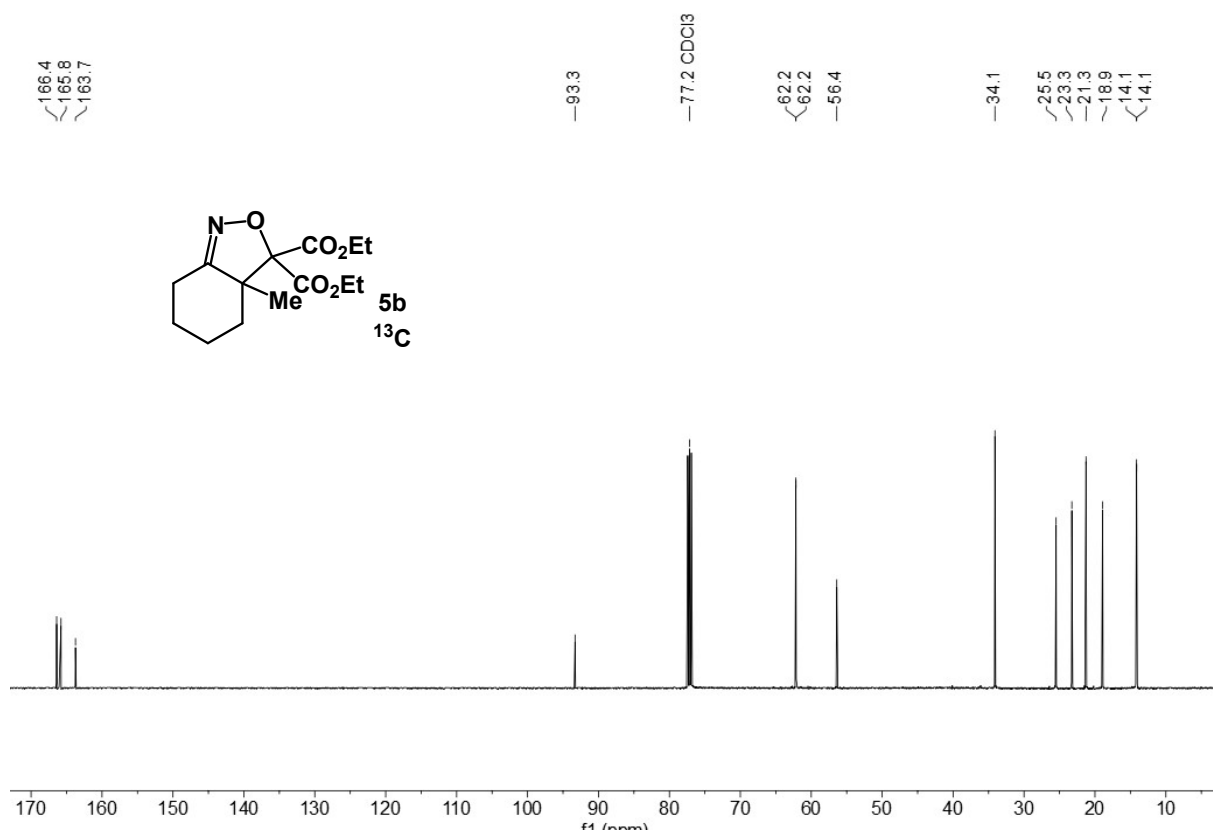

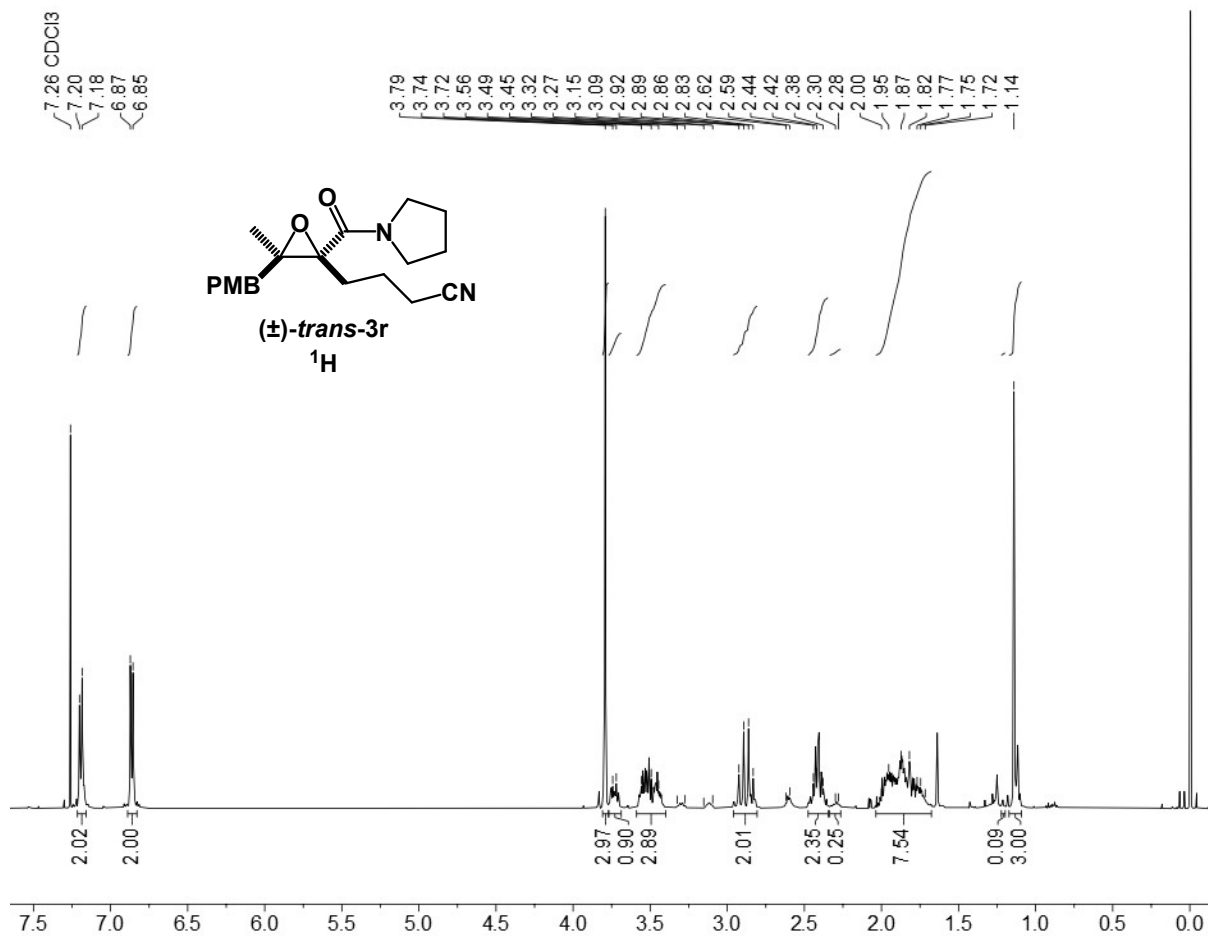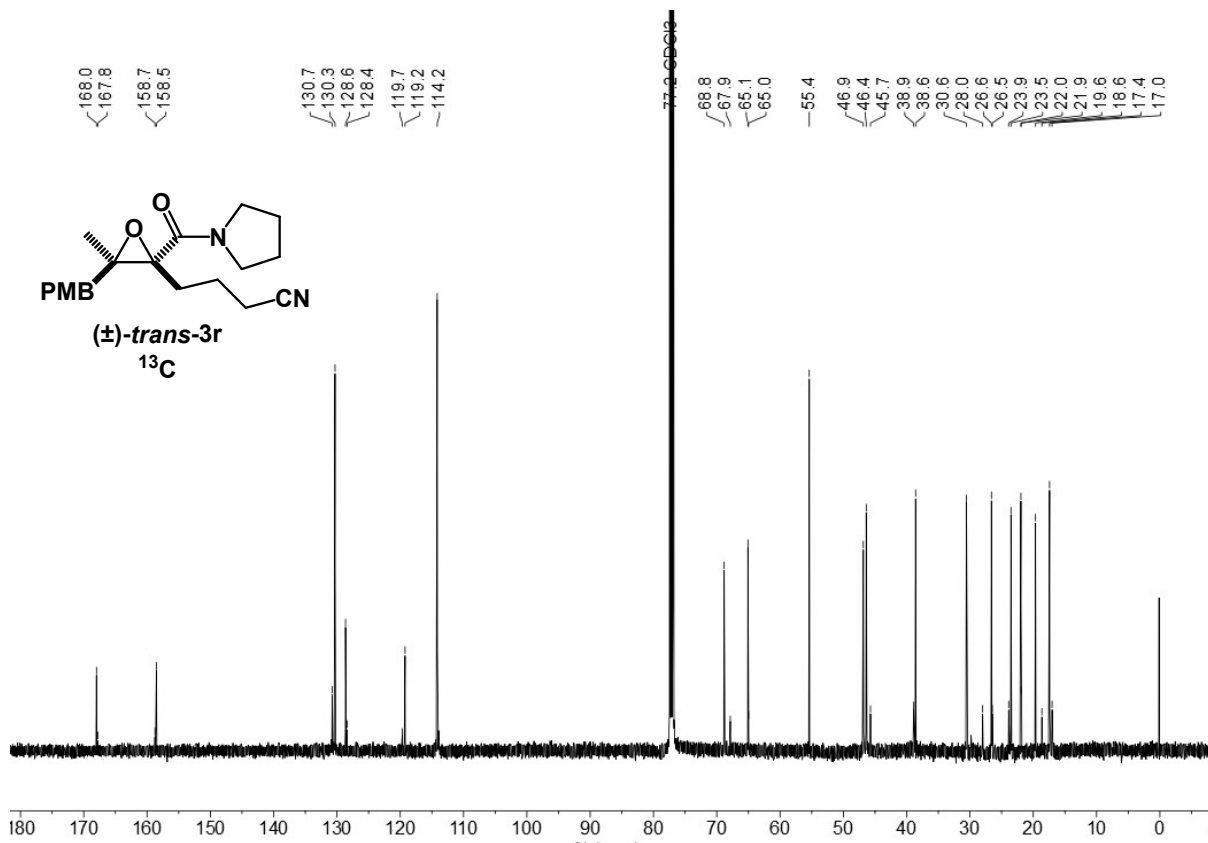

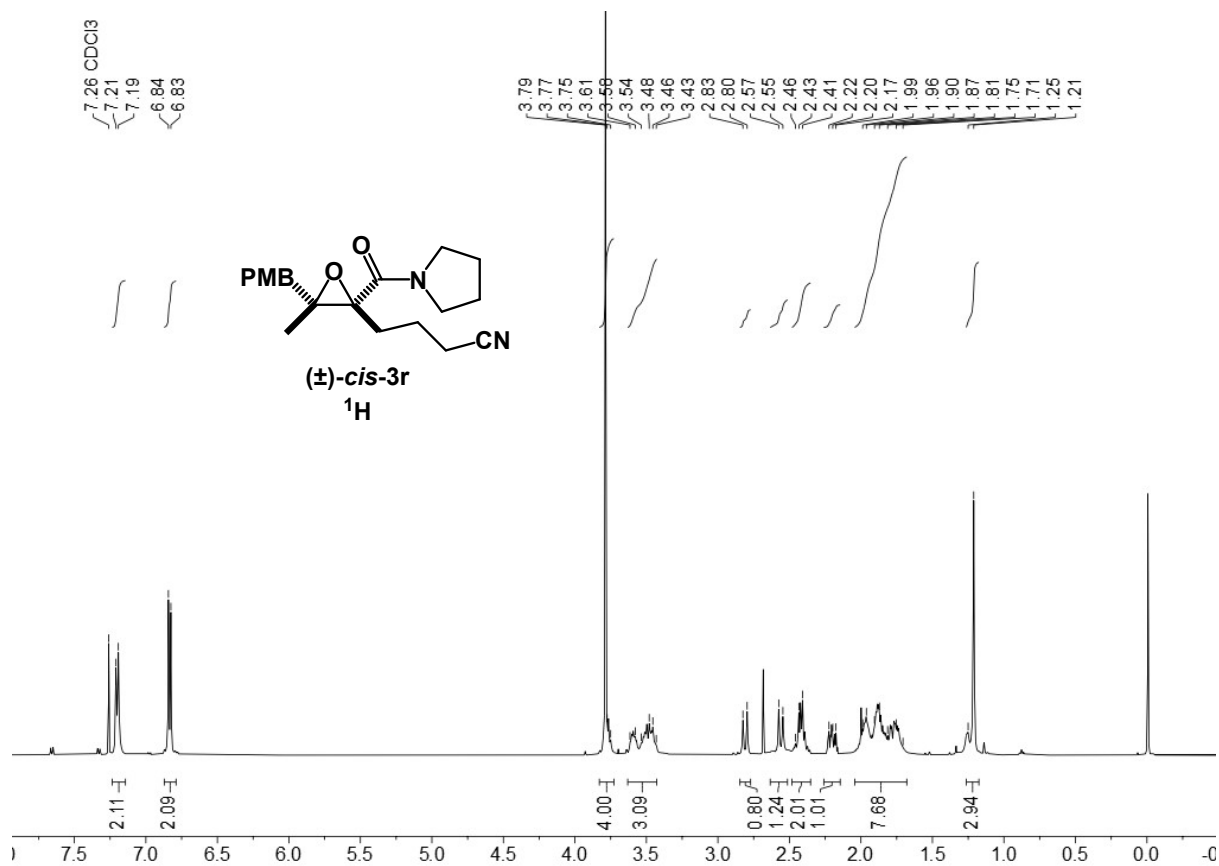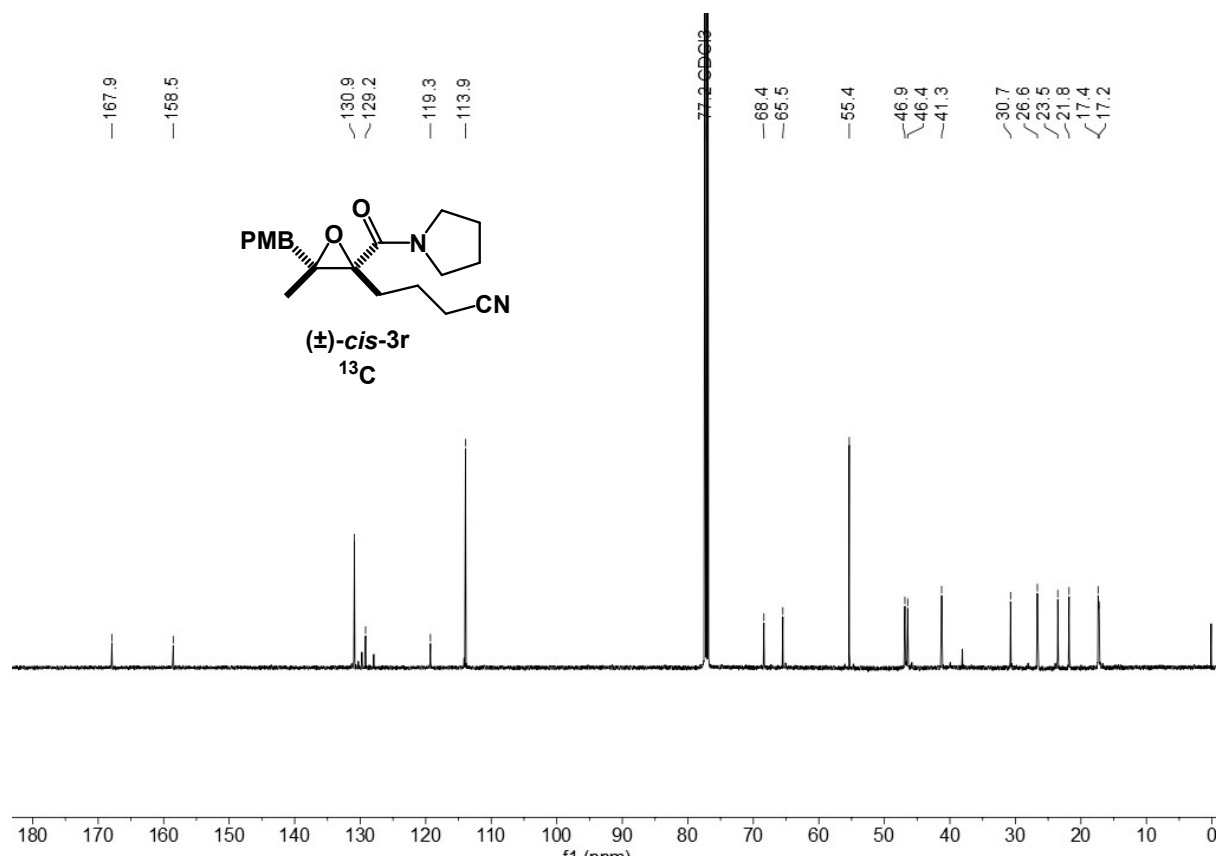

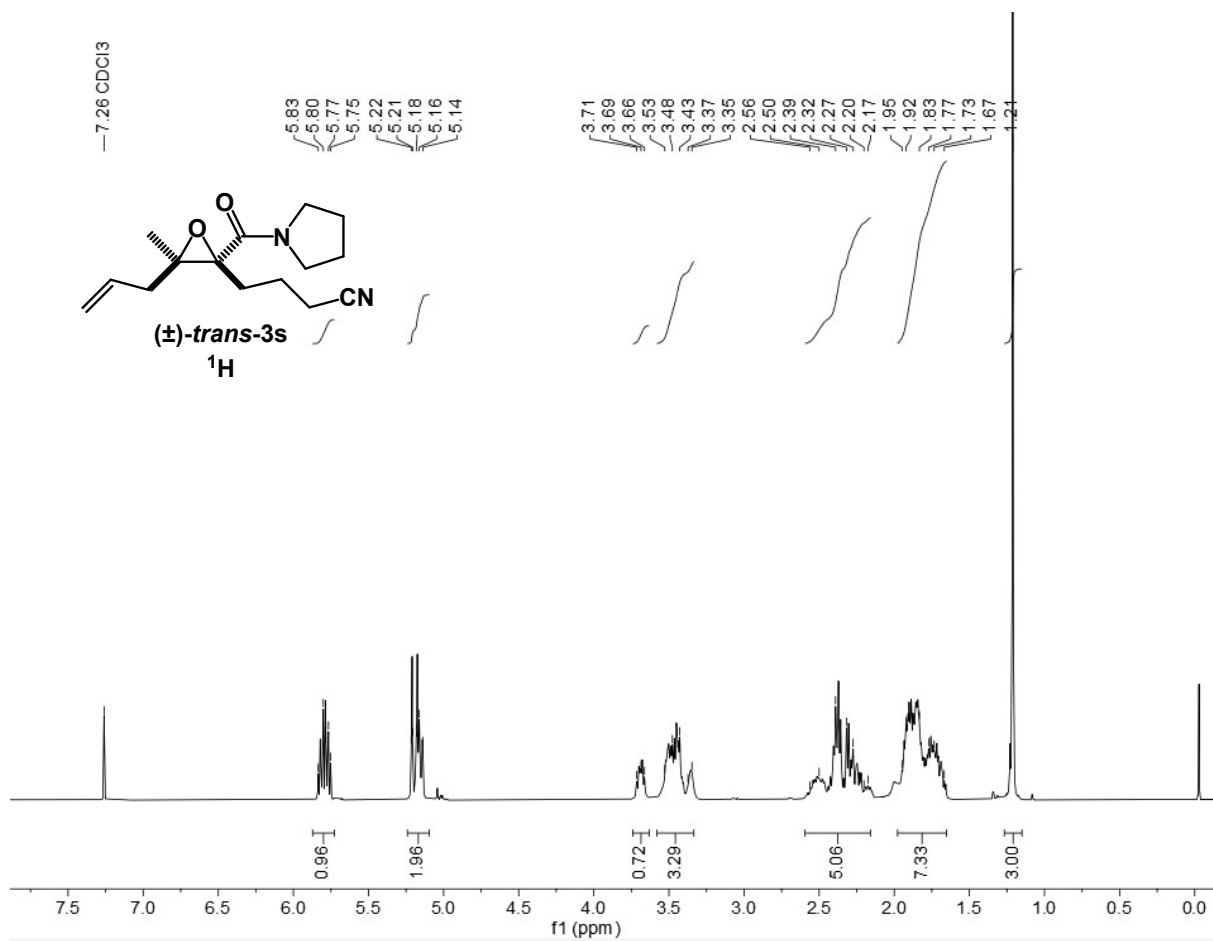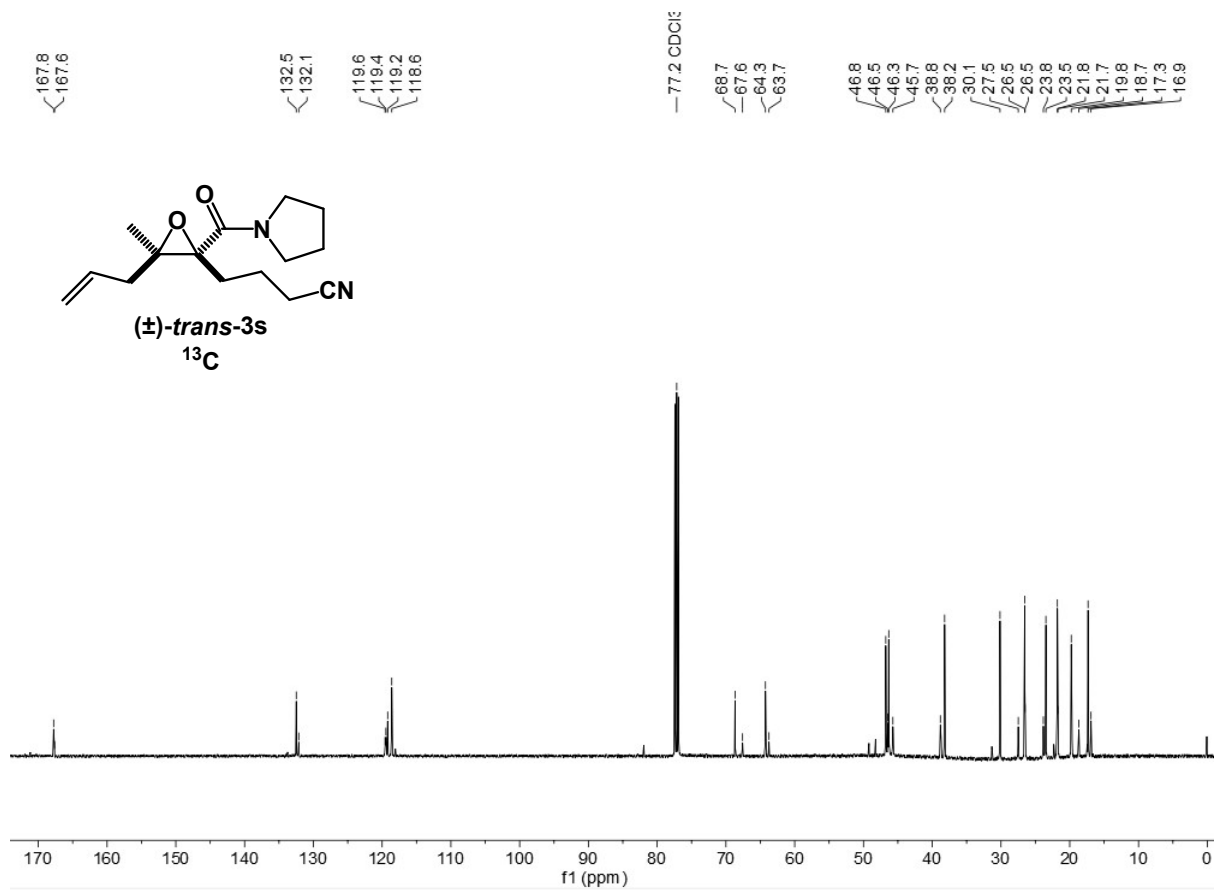

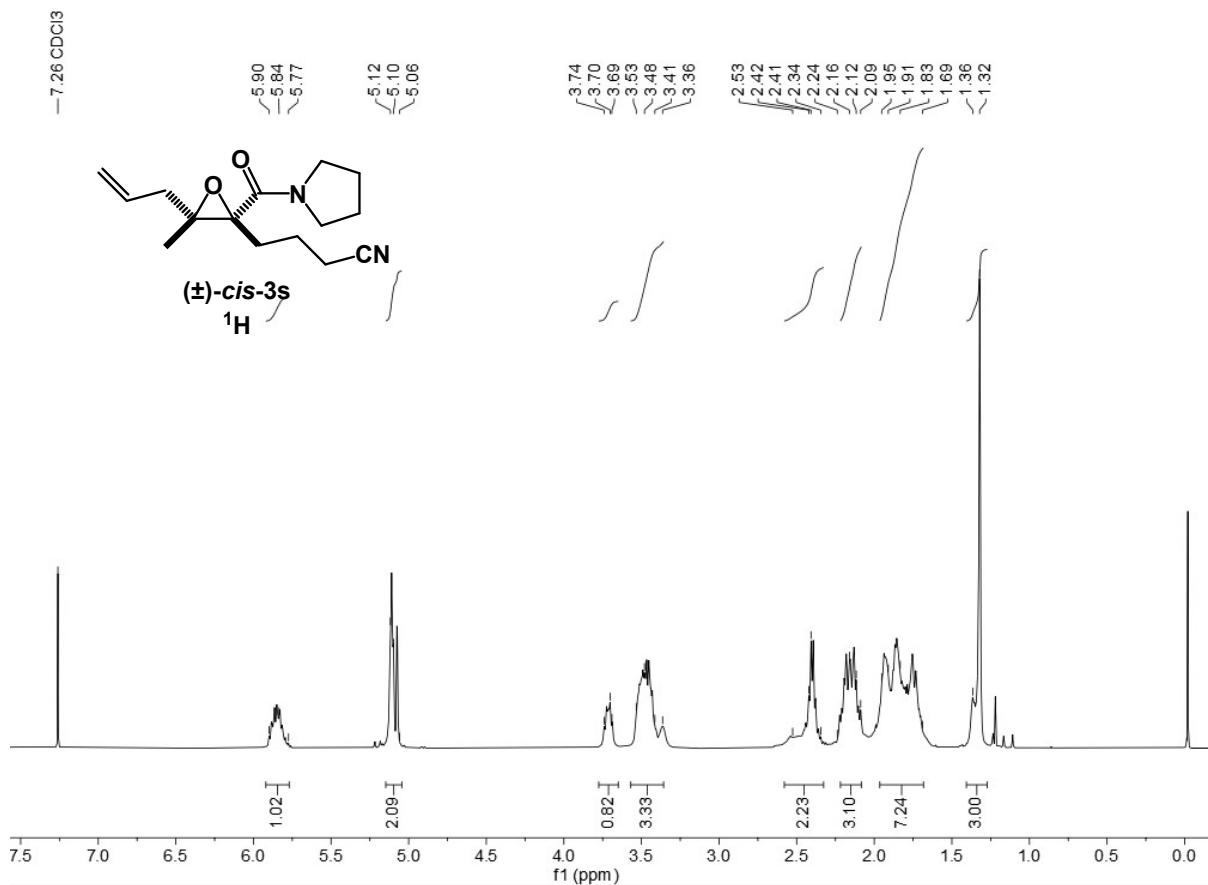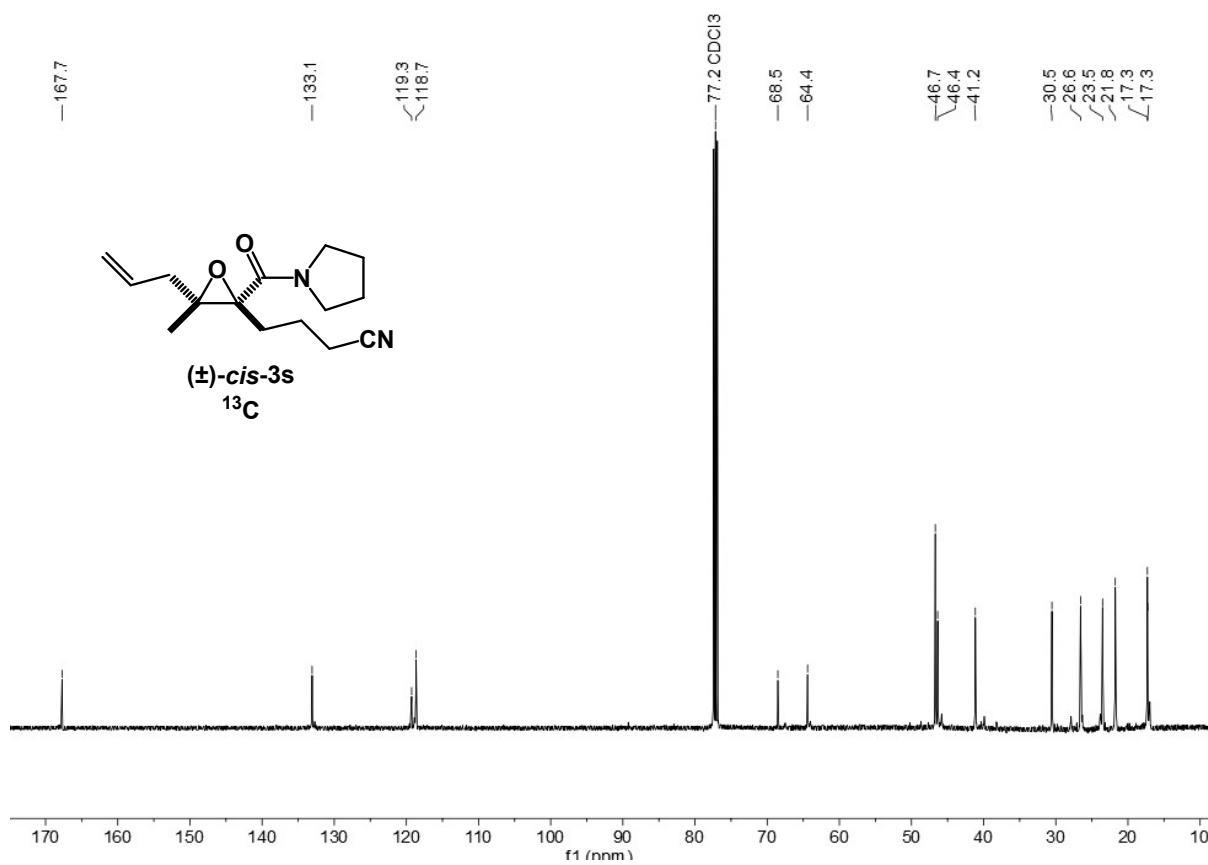



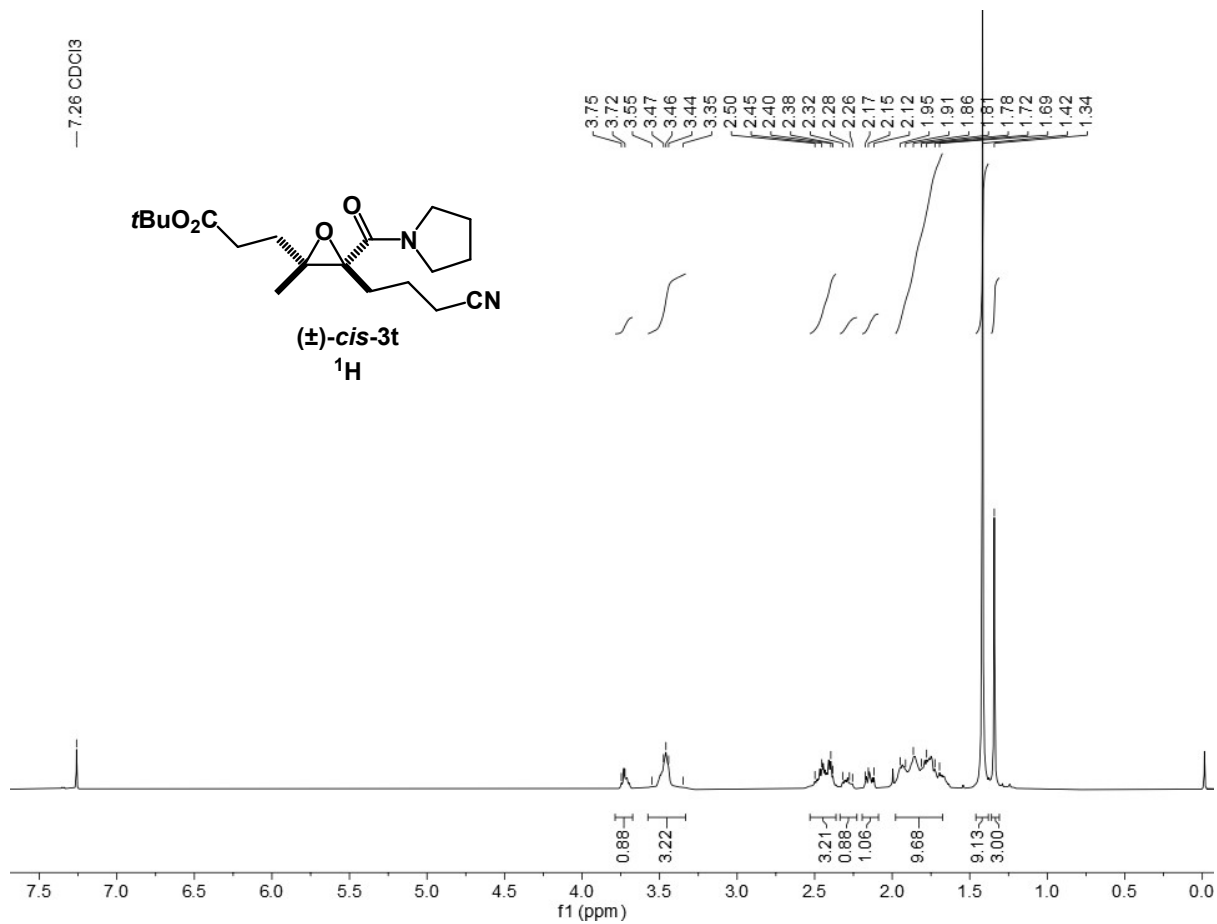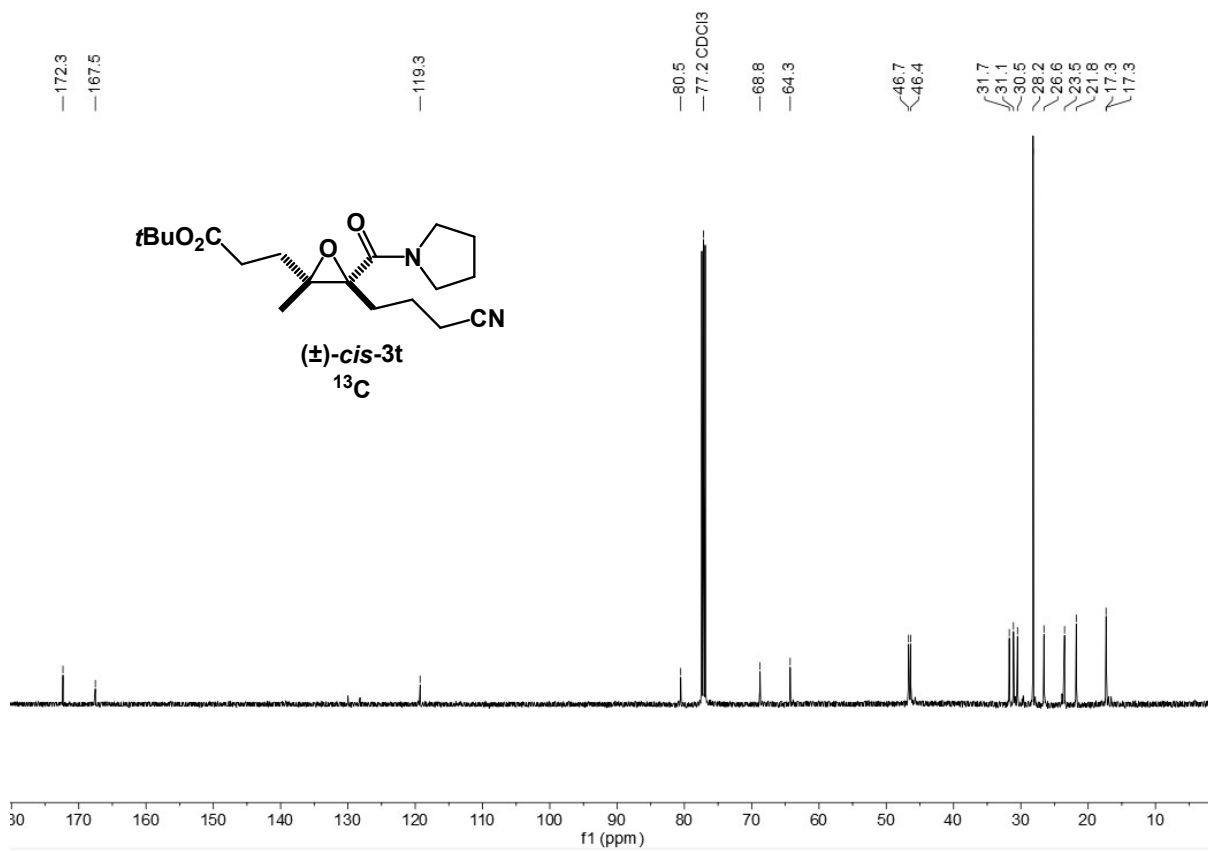

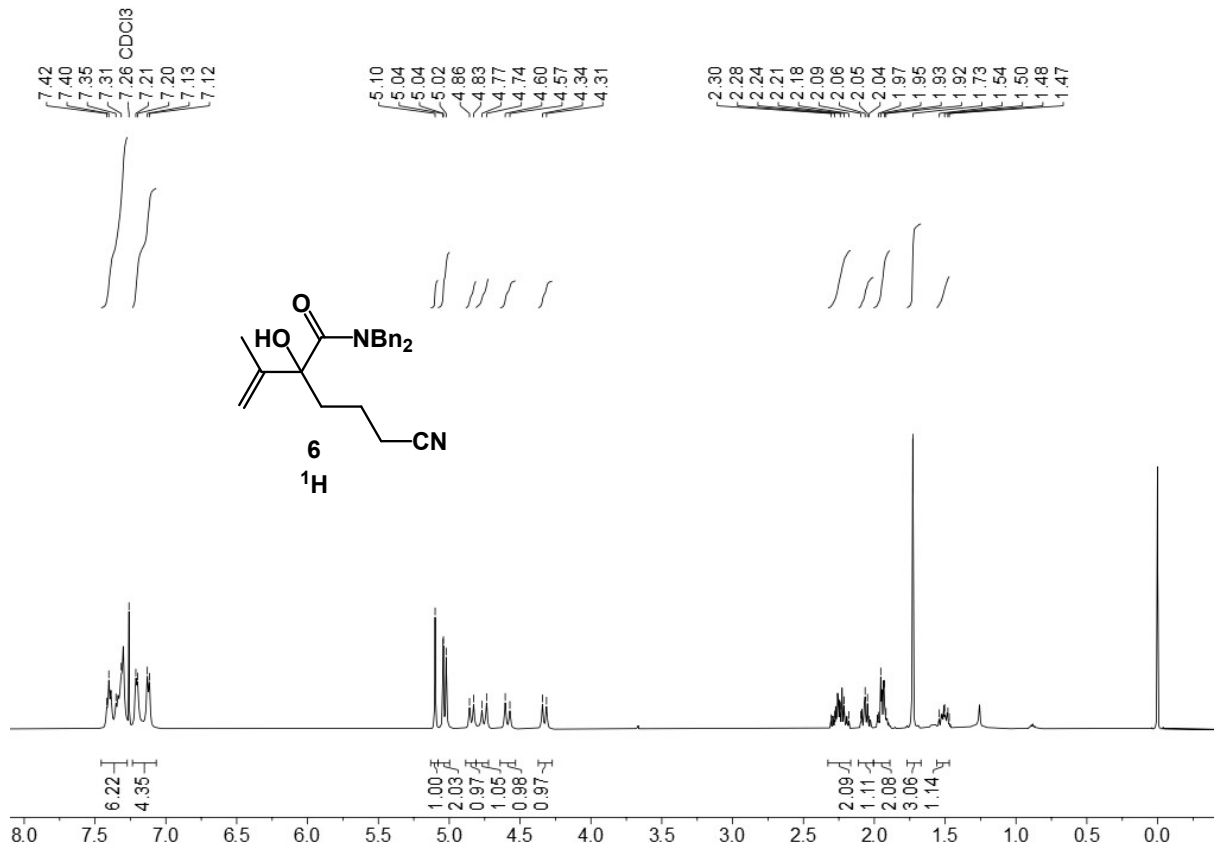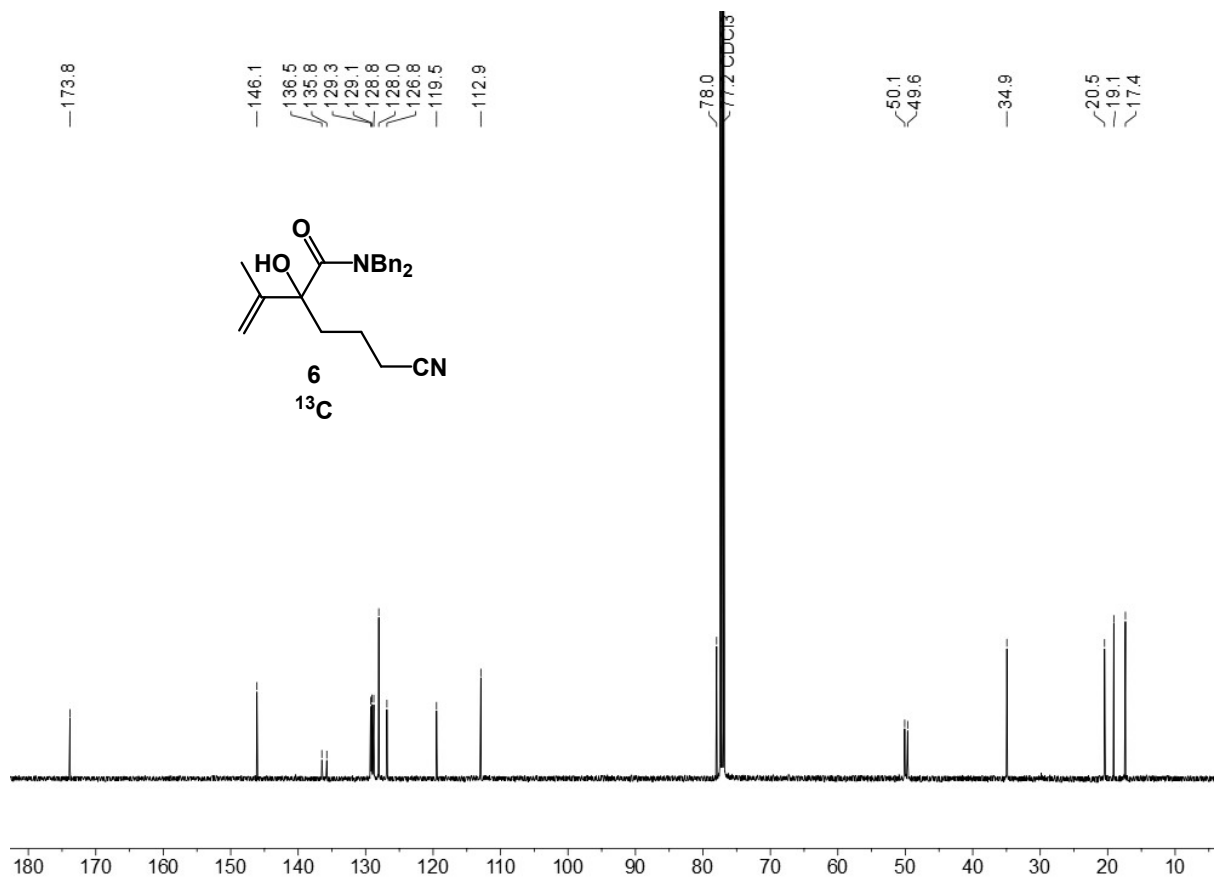

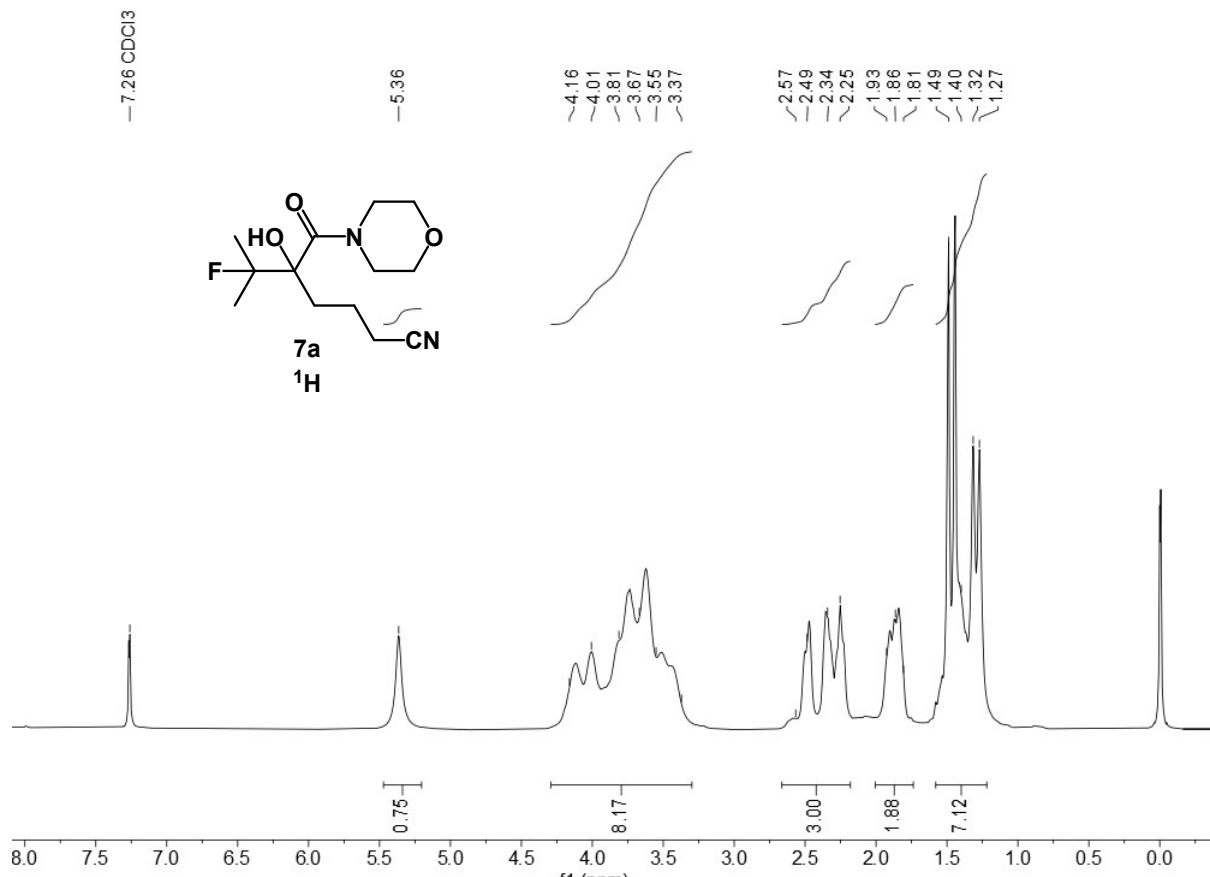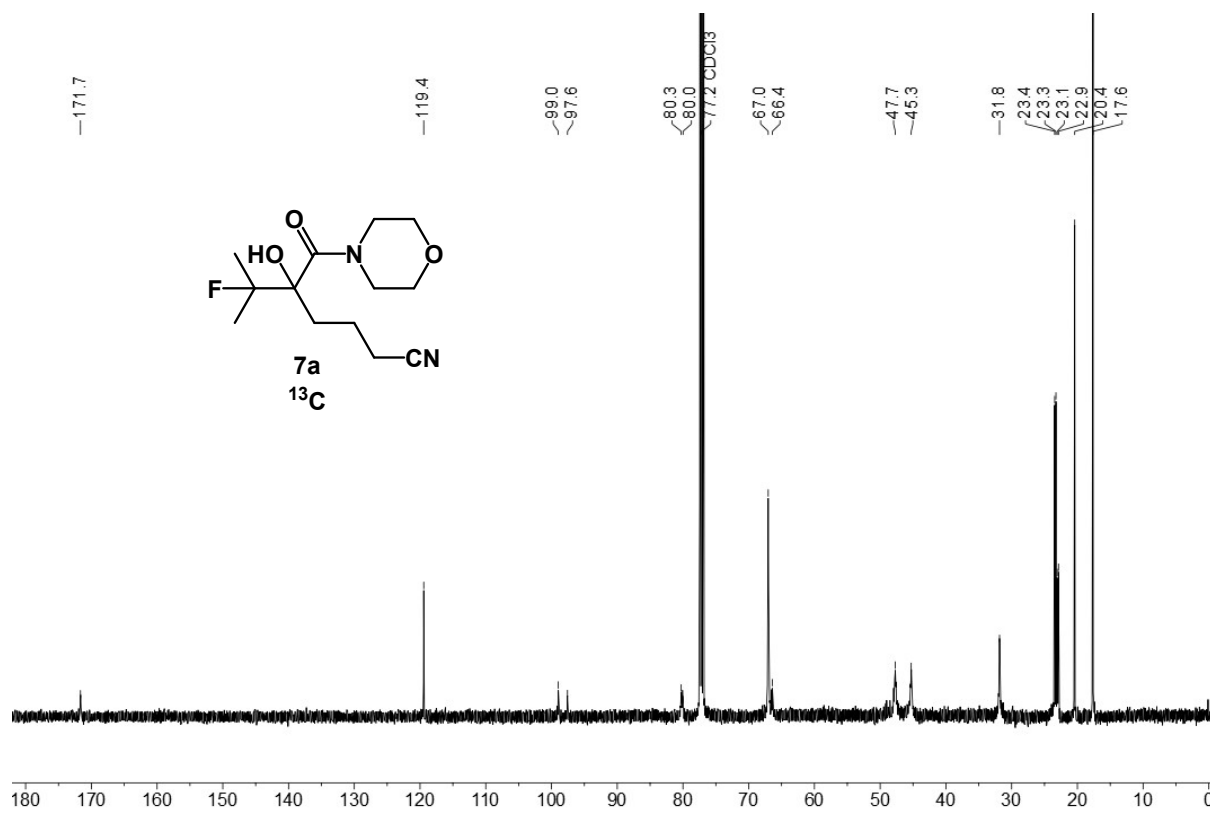

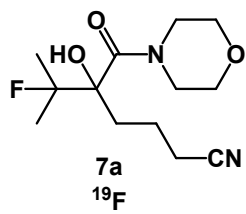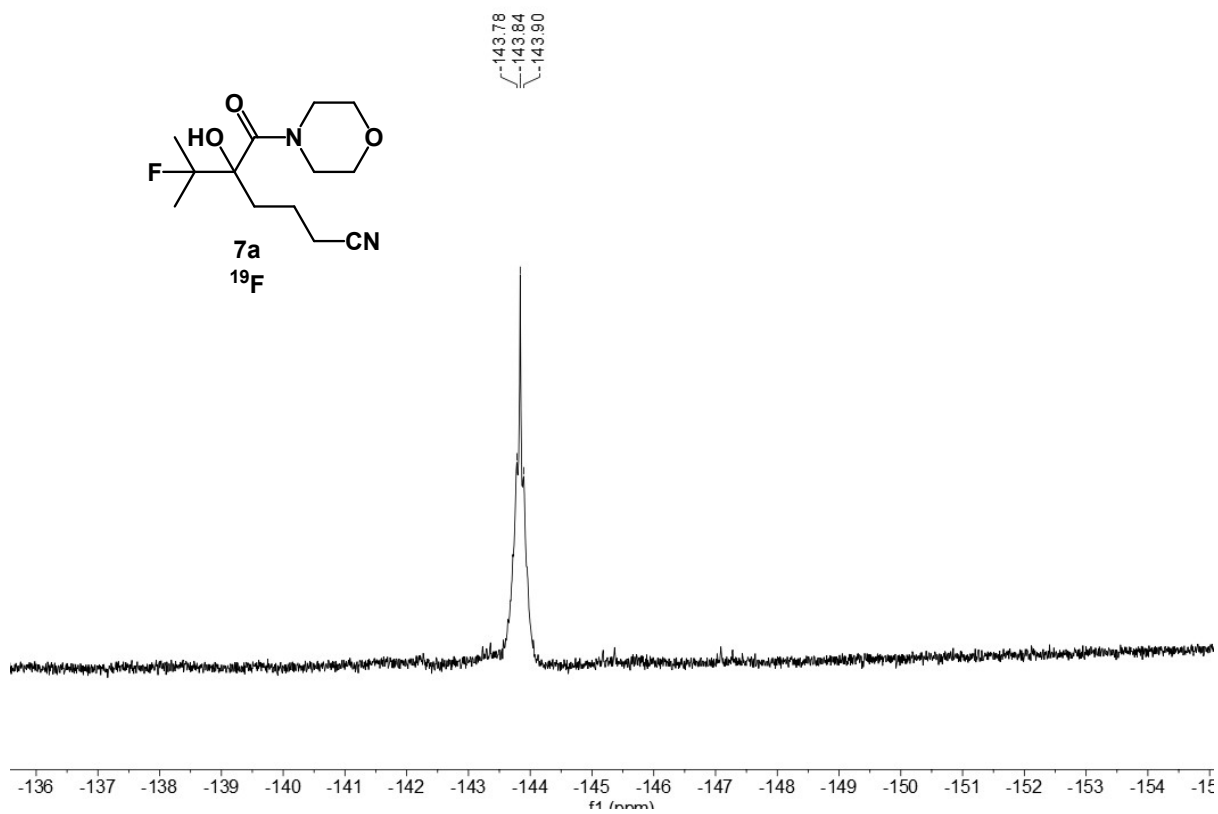

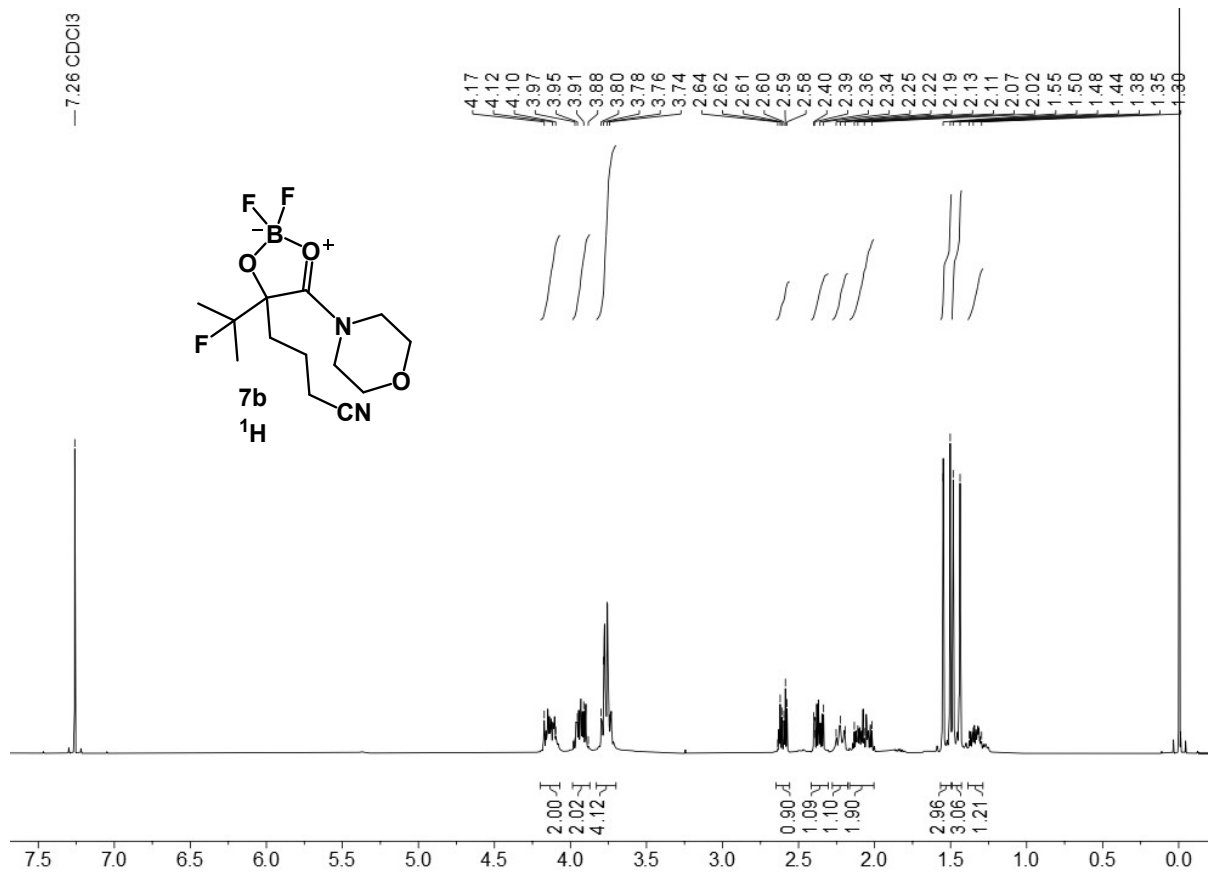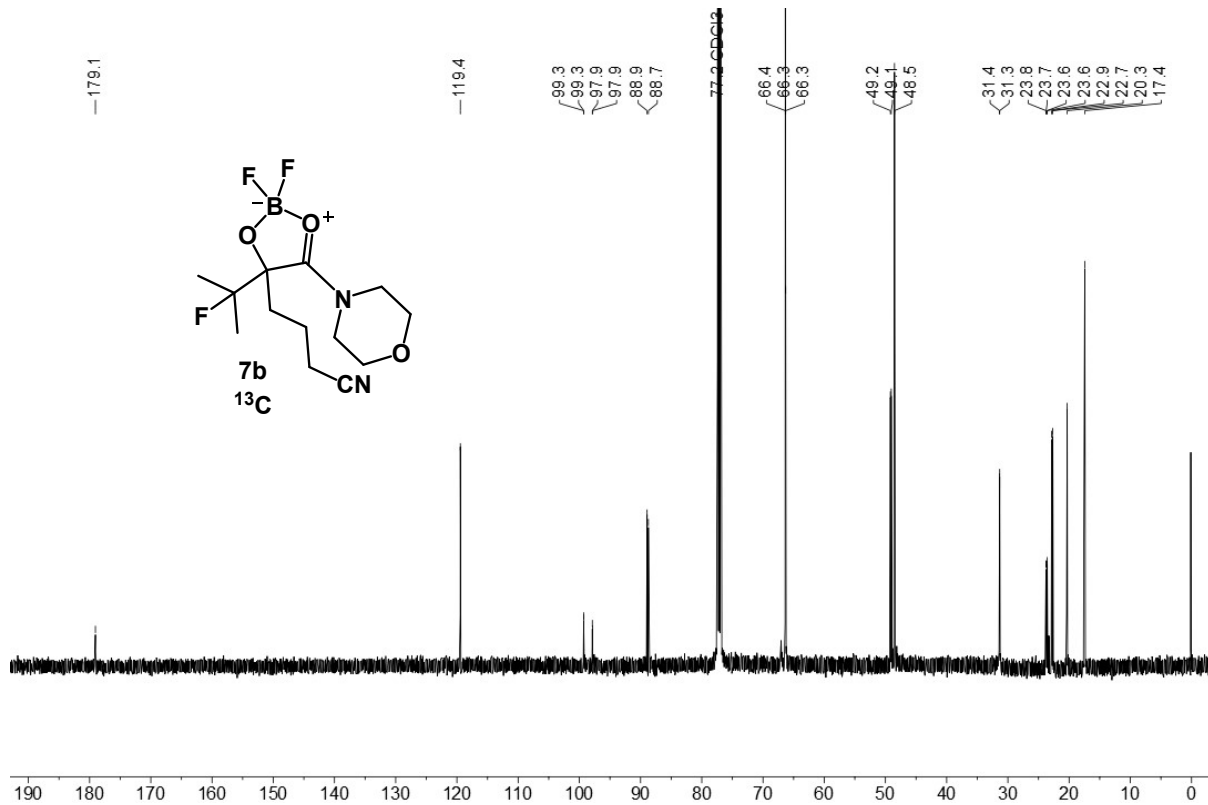

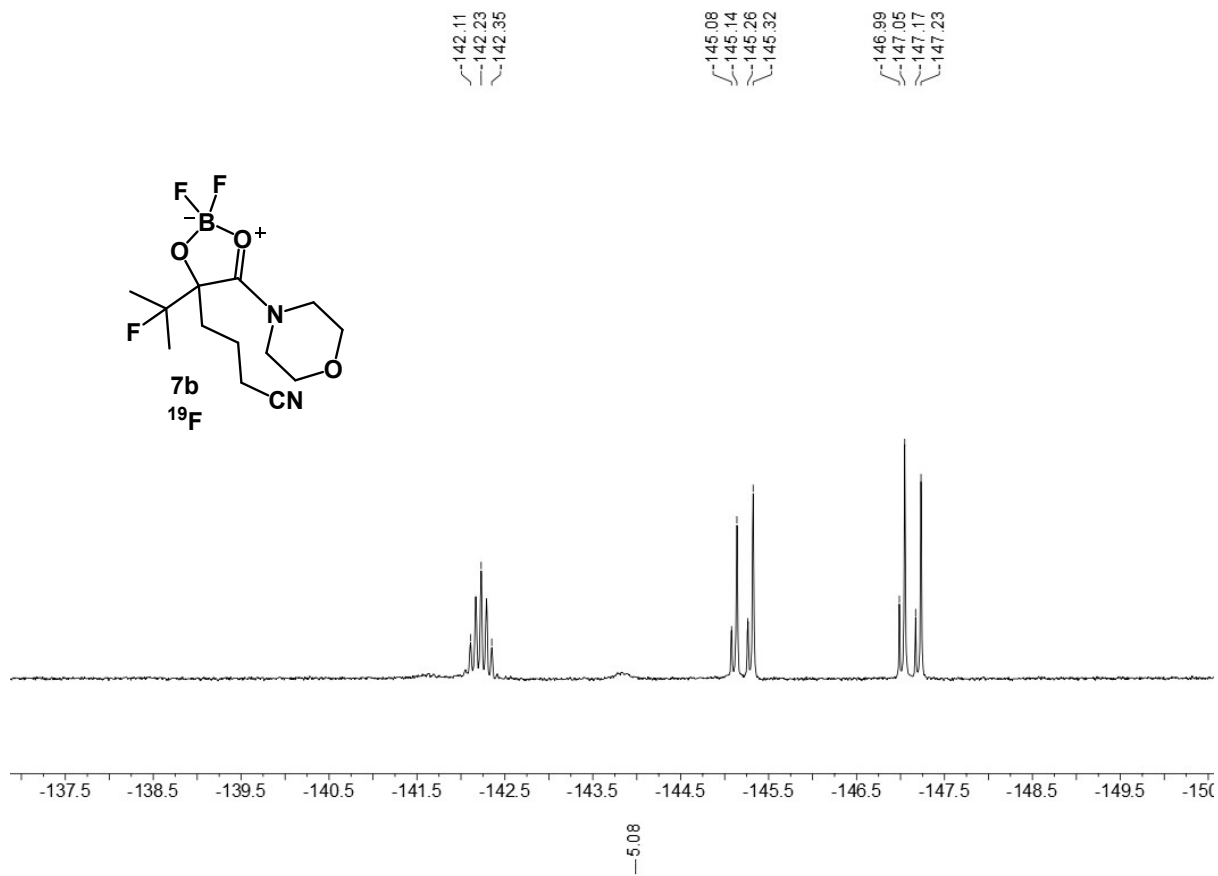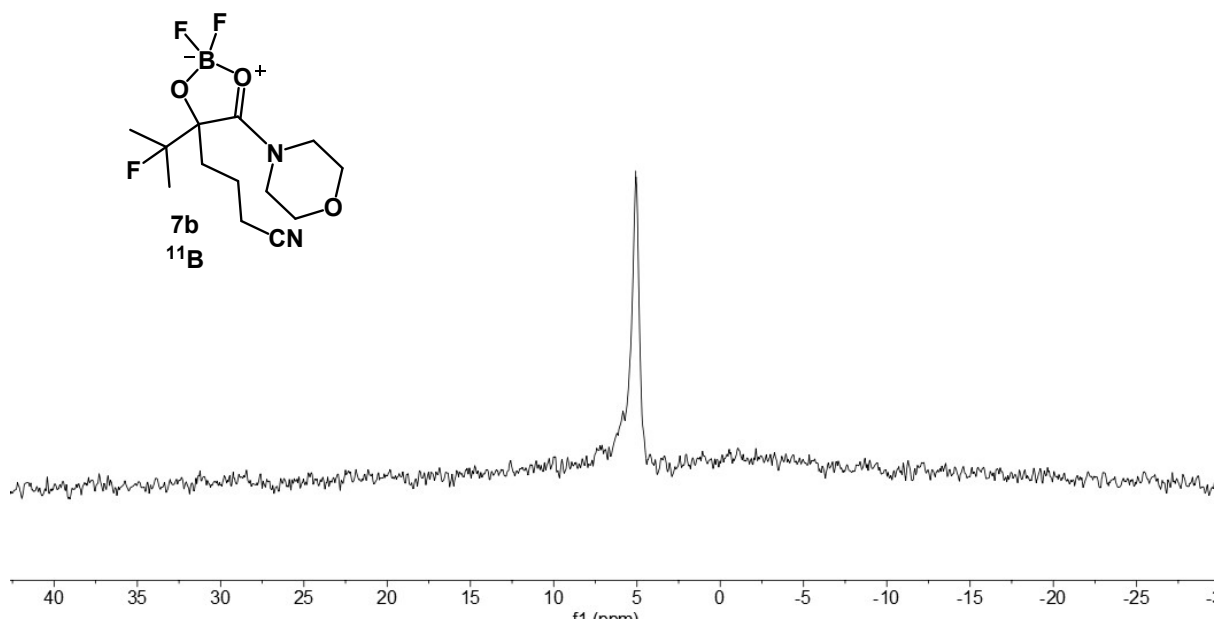

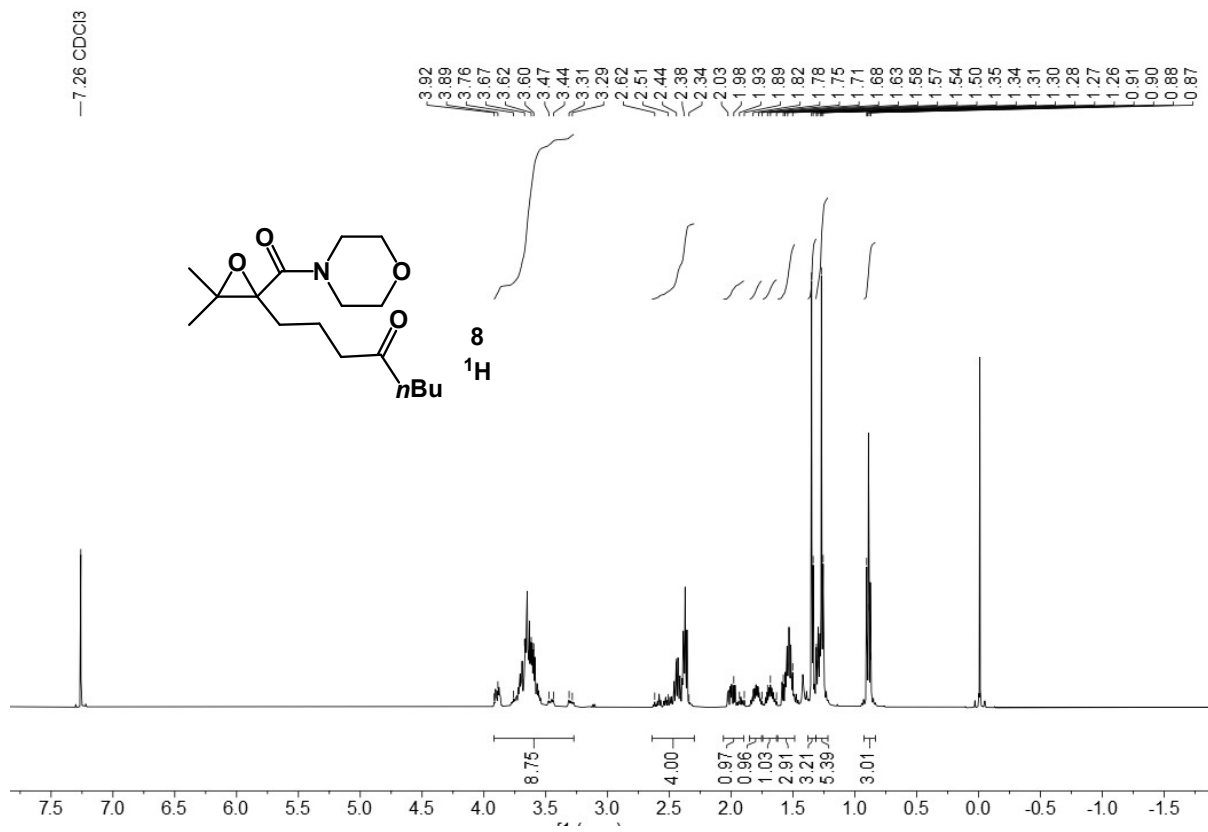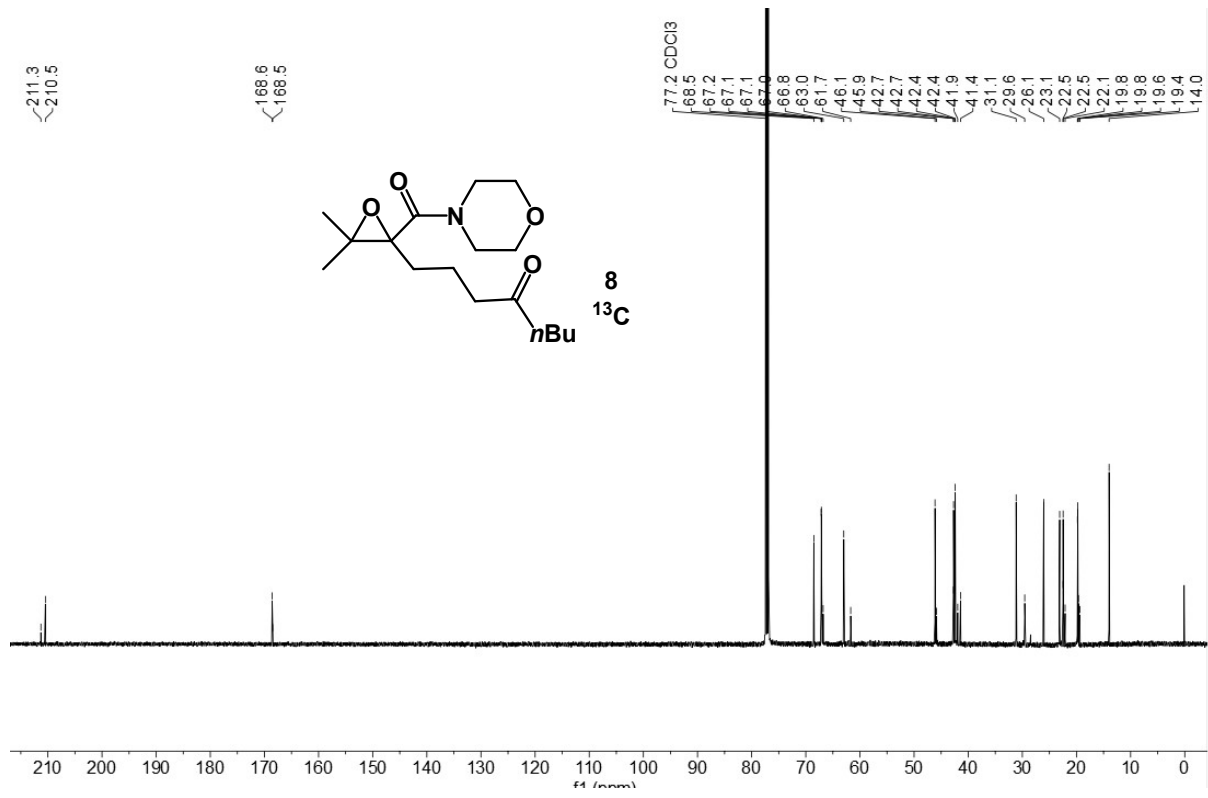

## Crystallography data for 3f, 5a, and 7b

Table S1. Crystal data and structure refinement for **3f**.

|                                   |                                                               |                 |
|-----------------------------------|---------------------------------------------------------------|-----------------|
| Identification code               | <b>3f</b>                                                     |                 |
| Empirical formula                 | C <sub>13</sub> H <sub>20</sub> N <sub>2</sub> O <sub>2</sub> |                 |
| Formula weight                    | 238.11                                                        |                 |
| Temperature                       | 150(2) K                                                      |                 |
| Wavelength                        | 0.71073 Å                                                     |                 |
| Crystal system                    | Triclinic                                                     |                 |
| Space group                       | P-1                                                           |                 |
| Unit cell dimensions              | a = 5.7302(7) Å                                               | α = 83.662(4)°. |
|                                   | b = 9.9783(12) Å                                              | β = 89.167(5)°. |
|                                   | c = 11.5048(17) Å                                             | γ = 86.054(4)°. |
| Volume                            | 652.23(15) Å <sup>3</sup>                                     |                 |
| Z                                 | 2                                                             |                 |
| Density (calculated)              | 1.212 Mg/m <sup>3</sup>                                       |                 |
| Absorption coefficient            | 0.083 mm <sup>-1</sup>                                        |                 |
| F(000)                            | 258                                                           |                 |
| Crystal size                      | 0.320 x 0.200 x 0.180 mm <sup>3</sup>                         |                 |
| Theta range for data collection   | 1.781 to 27.514°.                                             |                 |
| Index ranges                      | -7 ≤ h ≤ 7, -9 ≤ k ≤ 12, -14 ≤ l ≤ 14                         |                 |
| Reflections collected             | 11552                                                         |                 |
| Independent reflections           | 2971 [R(int) = 0.0280]                                        |                 |
| Completeness to theta = 25.242°   | 98.7 %                                                        |                 |
| Absorption correction             | Semi-empirical from equivalents                               |                 |
| Max. and min. transmission        | 0.7456 and 0.7144                                             |                 |
| Refinement method                 | Full-matrix least-squares on F <sup>2</sup>                   |                 |
| Data / restraints / parameters    | 2971 / 3 / 172                                                |                 |
| Goodness-of-fit on F <sup>2</sup> | 1.045                                                         |                 |
| Final R indices [I > 2σ(I)]       | R1 = 0.0367, wR2 = 0.0867                                     |                 |
| R indices (all data)              | R1 = 0.0495, wR2 = 0.0920                                     |                 |
| Extinction coefficient            | n/a                                                           |                 |
| Largest diff. peak and hole       | 0.299 and -0.149 e.Å <sup>-3</sup>                            |                 |

Table S2. Atomic coordinates ( × 10<sup>4</sup>) and equivalent isotropic displacement parameters (Å<sup>2</sup> × 10<sup>3</sup>) for **3f**. U(eq) is defined as one third of the trace of the orthogonalized U<sup>ij</sup> tensor.

---

|  |   |   |   |       |
|--|---|---|---|-------|
|  | x | y | z | U(eq) |
|--|---|---|---|-------|



|       |         |          |          |       |
|-------|---------|----------|----------|-------|
| O(1)  | 6662(1) | 6504(1)  | 9009(1)  | 24(1) |
| O(2)  | 7763(1) | 5854(1)  | 6779(1)  | 29(1) |
| N(1)  | 4657(2) | 7126(1)  | 6005(1)  | 24(1) |
| N(2)  | 1402(2) | 1190(1)  | 7771(1)  | 38(1) |
| C(1)  | 4872(2) | 6634(1)  | 8127(1)  | 19(1) |
| C(2)  | 5398(2) | 7814(1)  | 8727(1)  | 22(1) |
| C(3)  | 3817(2) | 8292(1)  | 9677(1)  | 27(1) |
| C(4)  | 6879(2) | 8880(1)  | 8126(1)  | 30(1) |
| C(5)  | 5895(2) | 6512(1)  | 6911(1)  | 21(1) |
| C(6)  | 2435(2) | 7962(1)  | 6035(1)  | 29(1) |
| C(7)  | 2236(2) | 8633(1)  | 4777(1)  | 34(1) |
| C(8)  | 3381(2) | 7561(1)  | 4063(1)  | 37(1) |
| C(9)  | 5470(2) | 6999(1)  | 4798(1)  | 31(1) |
| C(10) | 2764(2) | 5823(1)  | 8443(1)  | 22(1) |
| C(11) | 2993(2) | 4432(1)  | 8009(1)  | 24(1) |
| C(12) | 933(2)  | 3608(1)  | 8443(1)  | 24(1) |
| C(13) | 1158(2) | 2248(1)  | 8071(1)  | 26(1) |
| O(1W) | 620(20) | 5483(15) | 4985(15) | 86(7) |

Table S3. Bond lengths [ $\text{\AA}$ ] and angles [ $^\circ$ ] for **3f**.

|            |            |
|------------|------------|
| O(1)-C(1)  | 1.4426(12) |
| O(1)-C(2)  | 1.4562(13) |
| O(2)-C(5)  | 1.2330(13) |
| N(1)-C(5)  | 1.3366(14) |
| N(1)-C(9)  | 1.4748(14) |
| N(1)-C(6)  | 1.4754(15) |
| N(2)-C(13) | 1.1453(15) |
| C(1)-C(2)  | 1.4797(14) |
| C(1)-C(10) | 1.5169(14) |
| C(1)-C(5)  | 1.5230(15) |
| C(2)-C(3)  | 1.5063(15) |
| C(2)-C(4)  | 1.5077(15) |
| C(3)-H(3A) | 0.9800     |
| C(3)-H(3B) | 0.9800     |
| C(3)-H(3C) | 0.9800     |

|                 |            |
|-----------------|------------|
| C(4)-H(4A)      | 0.9800     |
| C(4)-H(4B)      | 0.9800     |
| C(4)-H(4C)      | 0.9800     |
| C(6)-C(7)       | 1.5276(17) |
| C(6)-H(6A)      | 0.9900     |
| C(6)-H(6B)      | 0.9900     |
| C(7)-C(8)       | 1.5262(18) |
| C(7)-H(7A)      | 0.9900     |
| C(7)-H(7B)      | 0.9900     |
| C(8)-C(9)       | 1.5146(18) |
| C(8)-H(8A)      | 0.9900     |
| C(8)-H(8B)      | 0.9900     |
| C(9)-H(9A)      | 0.9900     |
| C(9)-H(9B)      | 0.9900     |
| C(10)-C(11)     | 1.5232(14) |
| C(10)-H(10A)    | 0.9900     |
| C(10)-H(10B)    | 0.9900     |
| C(11)-C(12)     | 1.5311(14) |
| C(11)-H(11A)    | 0.9900     |
| C(11)-H(11B)    | 0.9900     |
| C(12)-C(13)     | 1.4639(16) |
| C(12)-H(12A)    | 0.9900     |
| C(12)-H(12B)    | 0.9900     |
| O(1W)-H(1WA)    | 0.841(10)  |
| O(1W)-H(1WB)    | 0.840(10)  |
|                 |            |
| C(1)-O(1)-C(2)  | 61.39(6)   |
| C(5)-N(1)-C(9)  | 120.26(9)  |
| C(5)-N(1)-C(6)  | 127.85(9)  |
| C(9)-N(1)-C(6)  | 111.88(9)  |
| O(1)-C(1)-C(2)  | 59.76(6)   |
| O(1)-C(1)-C(10) | 114.90(8)  |
| C(2)-C(1)-C(10) | 122.49(9)  |
| O(1)-C(1)-C(5)  | 111.97(8)  |
| C(2)-C(1)-C(5)  | 118.58(8)  |
| C(10)-C(1)-C(5) | 115.44(9)  |
| O(1)-C(2)-C(1)  | 58.85(6)   |
| O(1)-C(2)-C(3)  | 115.77(9)  |

|                  |            |
|------------------|------------|
| C(1)-C(2)-C(3)   | 121.14(9)  |
| O(1)-C(2)-C(4)   | 113.85(9)  |
| C(1)-C(2)-C(4)   | 120.07(9)  |
| C(3)-C(2)-C(4)   | 114.51(9)  |
| C(2)-C(3)-H(3A)  | 109.5      |
| C(2)-C(3)-H(3B)  | 109.5      |
| H(3A)-C(3)-H(3B) | 109.5      |
| C(2)-C(3)-H(3C)  | 109.5      |
| H(3A)-C(3)-H(3C) | 109.5      |
| H(3B)-C(3)-H(3C) | 109.5      |
| C(2)-C(4)-H(4A)  | 109.5      |
| C(2)-C(4)-H(4B)  | 109.5      |
| H(4A)-C(4)-H(4B) | 109.5      |
| C(2)-C(4)-H(4C)  | 109.5      |
| H(4A)-C(4)-H(4C) | 109.5      |
| H(4B)-C(4)-H(4C) | 109.5      |
| O(2)-C(5)-N(1)   | 122.08(10) |
| O(2)-C(5)-C(1)   | 120.91(9)  |
| N(1)-C(5)-C(1)   | 117.00(9)  |
| N(1)-C(6)-C(7)   | 102.43(9)  |
| N(1)-C(6)-H(6A)  | 111.3      |
| C(7)-C(6)-H(6A)  | 111.3      |
| N(1)-C(6)-H(6B)  | 111.3      |
| C(7)-C(6)-H(6B)  | 111.3      |
| H(6A)-C(6)-H(6B) | 109.2      |
| C(8)-C(7)-C(6)   | 103.24(10) |
| C(8)-C(7)-H(7A)  | 111.1      |
| C(6)-C(7)-H(7A)  | 111.1      |
| C(8)-C(7)-H(7B)  | 111.1      |
| C(6)-C(7)-H(7B)  | 111.1      |
| H(7A)-C(7)-H(7B) | 109.1      |
| C(9)-C(8)-C(7)   | 103.07(10) |
| C(9)-C(8)-H(8A)  | 111.1      |
| C(7)-C(8)-H(8A)  | 111.1      |
| C(9)-C(8)-H(8B)  | 111.1      |
| C(7)-C(8)-H(8B)  | 111.1      |
| H(8A)-C(8)-H(8B) | 109.1      |
| N(1)-C(9)-C(8)   | 103.37(9)  |

|                     |            |
|---------------------|------------|
| N(1)-C(9)-H(9A)     | 111.1      |
| C(8)-C(9)-H(9A)     | 111.1      |
| N(1)-C(9)-H(9B)     | 111.1      |
| C(8)-C(9)-H(9B)     | 111.1      |
| H(9A)-C(9)-H(9B)    | 109.1      |
| C(1)-C(10)-C(11)    | 112.65(9)  |
| C(1)-C(10)-H(10A)   | 109.1      |
| C(11)-C(10)-H(10A)  | 109.1      |
| C(1)-C(10)-H(10B)   | 109.1      |
| C(11)-C(10)-H(10B)  | 109.1      |
| H(10A)-C(10)-H(10B) | 107.8      |
| C(10)-C(11)-C(12)   | 110.64(9)  |
| C(10)-C(11)-H(11A)  | 109.5      |
| C(12)-C(11)-H(11A)  | 109.5      |
| C(10)-C(11)-H(11B)  | 109.5      |
| C(12)-C(11)-H(11B)  | 109.5      |
| H(11A)-C(11)-H(11B) | 108.1      |
| C(13)-C(12)-C(11)   | 111.62(9)  |
| C(13)-C(12)-H(12A)  | 109.3      |
| C(11)-C(12)-H(12A)  | 109.3      |
| C(13)-C(12)-H(12B)  | 109.3      |
| C(11)-C(12)-H(12B)  | 109.3      |
| H(12A)-C(12)-H(12B) | 108.0      |
| N(2)-C(13)-C(12)    | 177.93(12) |
| H(1WA)-O(1W)-H(1WB) | 113(2)     |

---

Symmetry transformations used to generate equivalent atoms:

Table S4. Anisotropic displacement parameters ( $\text{\AA}^2 \times 10^3$ ) for **3f**. The anisotropic displacement factor exponent takes the form:  $-2\pi^2 [h^2 a^{*2} U^{11} + \dots + 2 h k a^* b^* U^{12}]$

|      | $U^{11}$ | $U^{22}$ | $U^{33}$ | $U^{23}$ | $U^{13}$ | $U^{12}$ |
|------|----------|----------|----------|----------|----------|----------|
| O(1) | 25(1)    | 26(1)    | 22(1)    | -2(1)    | -5(1)    | 0(1)     |
| O(2) | 25(1)    | 34(1)    | 26(1)    | -3(1)    | 3(1)     | 6(1)     |
| N(1) | 24(1)    | 29(1)    | 18(1)    | -3(1)    | 2(1)     | 2(1)     |
| N(2) | 42(1)    | 27(1)    | 48(1)    | -3(1)    | -7(1)    | -7(1)    |
| C(1) | 20(1)    | 20(1)    | 18(1)    | -1(1)    | -1(1)    | -1(1)    |

|       |        |        |         |        |       |        |
|-------|--------|--------|---------|--------|-------|--------|
| C(2)  | 23(1)  | 21(1)  | 21(1)   | -2(1)  | -2(1) | -2(1)  |
| C(3)  | 33(1)  | 25(1)  | 24(1)   | -6(1)  | 3(1)  | -4(1)  |
| C(4)  | 31(1)  | 26(1)  | 34(1)   | -5(1)  | 4(1)  | -9(1)  |
| C(5)  | 22(1)  | 20(1)  | 21(1)   | -2(1)  | 1(1)  | -4(1)  |
| C(6)  | 26(1)  | 34(1)  | 25(1)   | -4(1)  | -2(1) | 4(1)   |
| C(7)  | 38(1)  | 36(1)  | 28(1)   | -2(1)  | -7(1) | 4(1)   |
| C(8)  | 47(1)  | 42(1)  | 22(1)   | -4(1)  | -5(1) | 2(1)   |
| C(9)  | 37(1)  | 38(1)  | 19(1)   | -4(1)  | 4(1)  | 1(1)   |
| C(10) | 22(1)  | 22(1)  | 21(1)   | -4(1)  | 3(1)  | -4(1)  |
| C(11) | 27(1)  | 22(1)  | 24(1)   | -4(1)  | 4(1)  | -5(1)  |
| C(12) | 24(1)  | 23(1)  | 24(1)   | -1(1)  | -1(1) | -5(1)  |
| C(13) | 25(1)  | 26(1)  | 27(1)   | 3(1)   | -5(1) | -7(1)  |
| O(1W) | 77(10) | 77(10) | 114(13) | -60(9) | 68(9) | -25(7) |

Table S5. Hydrogen coordinates ( $\times 10^4$ ) and isotropic displacement parameters ( $\text{\AA}^2 \times 10^{-3}$ ) for **3f**.

|        | x    | y    | z     | U(eq) |
|--------|------|------|-------|-------|
| H(3A)  | 2967 | 7535 | 10044 | 41    |
| H(3B)  | 2697 | 9010 | 9337  | 41    |
| H(3C)  | 4757 | 8641 | 10266 | 41    |
| H(4A)  | 7858 | 8489 | 7526  | 45    |
| H(4B)  | 7879 | 9208 | 8702  | 45    |
| H(4C)  | 5862 | 9633 | 7758  | 45    |
| H(6A)  | 2505 | 8643 | 6595  | 34    |
| H(6B)  | 1105 | 7398 | 6246  | 34    |
| H(7A)  | 579  | 8849 | 4555  | 41    |
| H(7B)  | 3078 | 9472 | 4671  | 41    |
| H(8A)  | 2302 | 6849 | 3965  | 44    |
| H(8B)  | 3878 | 7968 | 3283  | 44    |
| H(9A)  | 5885 | 6043 | 4683  | 38    |
| H(9B)  | 6846 | 7532 | 4603  | 38    |
| H(10A) | 1346 | 6330 | 8101  | 26    |
| H(10B) | 2563 | 5715 | 9304  | 26    |
| H(11A) | 4476 | 3948 | 8294  | 29    |
| H(11B) | 3037 | 4533 | 7144  | 29    |

|        |           |           |           |     |
|--------|-----------|-----------|-----------|-----|
| H(12A) | 856       | 3540      | 9308      | 29  |
| H(12B) | -543      | 4080      | 8135      | 29  |
| H(1WA) | 600(400)  | 4900(200) | 4480(150) | 128 |
| H(1WB) | -600(200) | 5500(200) | 5400(170) | 128 |

---

Table S6. Torsion angles [°] for **3f**.

|                       |             |
|-----------------------|-------------|
| C(2)-O(1)-C(1)-C(10)  | -114.52(10) |
| C(2)-O(1)-C(1)-C(5)   | 111.22(9)   |
| C(1)-O(1)-C(2)-C(3)   | 112.28(10)  |
| C(1)-O(1)-C(2)-C(4)   | -111.90(10) |
| C(10)-C(1)-C(2)-O(1)  | 101.92(10)  |
| C(5)-C(1)-C(2)-O(1)   | -100.11(10) |
| O(1)-C(1)-C(2)-C(3)   | -103.20(11) |
| C(10)-C(1)-C(2)-C(3)  | -1.28(15)   |
| C(5)-C(1)-C(2)-C(3)   | 156.69(10)  |
| O(1)-C(1)-C(2)-C(4)   | 101.31(11)  |
| C(10)-C(1)-C(2)-C(4)  | -156.78(10) |
| C(5)-C(1)-C(2)-C(4)   | 1.19(15)    |
| C(9)-N(1)-C(5)-O(2)   | 1.83(16)    |
| C(6)-N(1)-C(5)-O(2)   | -178.69(10) |
| C(9)-N(1)-C(5)-C(1)   | -176.96(9)  |
| C(6)-N(1)-C(5)-C(1)   | 2.52(16)    |
| O(1)-C(1)-C(5)-O(2)   | 27.39(13)   |
| C(2)-C(1)-C(5)-O(2)   | 93.89(12)   |
| C(10)-C(1)-C(5)-O(2)  | -106.61(12) |
| O(1)-C(1)-C(5)-N(1)   | -153.81(9)  |
| C(2)-C(1)-C(5)-N(1)   | -87.30(12)  |
| C(10)-C(1)-C(5)-N(1)  | 72.19(12)   |
| C(5)-N(1)-C(6)-C(7)   | 166.93(11)  |
| C(9)-N(1)-C(6)-C(7)   | -13.55(12)  |
| N(1)-C(6)-C(7)-C(8)   | 32.83(12)   |
| C(6)-C(7)-C(8)-C(9)   | -40.50(13)  |
| C(5)-N(1)-C(9)-C(8)   | 168.18(10)  |
| C(6)-N(1)-C(9)-C(8)   | -11.38(13)  |
| C(7)-C(8)-C(9)-N(1)   | 31.62(13)   |
| O(1)-C(1)-C(10)-C(11) | -92.80(11)  |

|                         |            |
|-------------------------|------------|
| C(2)-C(1)-C(10)-C(11)   | -161.54(9) |
| C(5)-C(1)-C(10)-C(11)   | 39.85(13)  |
| C(1)-C(10)-C(11)-C(12)  | 174.87(9)  |
| C(10)-C(11)-C(12)-C(13) | -177.97(9) |

---

Symmetry transformations used to generate equivalent atoms:

Table S7. Crystal data and structure refinement for **5a**.

|                                   |                                                  |                  |
|-----------------------------------|--------------------------------------------------|------------------|
| Identification code               | <b>5a</b>                                        |                  |
| Empirical formula                 | C <sub>13</sub> H <sub>19</sub> N O <sub>5</sub> |                  |
| Formula weight                    | 269.29                                           |                  |
| Temperature                       | 150(2) K                                         |                  |
| Wavelength                        | 1.54178 Å                                        |                  |
| Crystal system                    | Monoclinic                                       |                  |
| Space group                       | P2 <sub>1</sub> /c                               |                  |
| Unit cell dimensions              | a = 11.2115(8) Å                                 | α = 90°.         |
|                                   | b = 11.5329(9) Å                                 | β = 104.981(4)°. |
|                                   | c = 11.1450(8) Å                                 | γ = 90°.         |
| Volume                            | 1392.08(18) Å <sup>3</sup>                       |                  |
| Z                                 | 4                                                |                  |
| Density (calculated)              | 1.285 Mg/m <sup>3</sup>                          |                  |
| Absorption coefficient            | 0.826 mm <sup>-1</sup>                           |                  |
| F(000)                            | 576                                              |                  |
| Crystal size                      | 0.370 x 0.340 x 0.250 mm <sup>3</sup>            |                  |
| Theta range for data collection   | 4.082 to 66.215°.                                |                  |
| Index ranges                      | -13 ≤ h ≤ 13, -13 ≤ k ≤ 13, -13 ≤ l ≤ 13         |                  |
| Reflections collected             | 34811                                            |                  |
| Independent reflections           | 2373 [R(int) = 0.0409]                           |                  |
| Completeness to theta = 66.215°   | 97.4 %                                           |                  |
| Absorption correction             | Semi-empirical from equivalents                  |                  |
| Max. and min. transmission        | 0.7528 and 0.6980                                |                  |
| Refinement method                 | Full-matrix least-squares on F <sup>2</sup>      |                  |
| Data / restraints / parameters    | 2373 / 0 / 174                                   |                  |
| Goodness-of-fit on F <sup>2</sup> | 1.101                                            |                  |
| Final R indices [I > 2σ(I)]       | R1 = 0.0343, wR2 = 0.0829                        |                  |
| R indices (all data)              | R1 = 0.0381, wR2 = 0.0853                        |                  |
| Extinction coefficient            | n/a                                              |                  |
| Largest diff. peak and hole       | 0.242 and -0.181 e.Å <sup>-3</sup>               |                  |

Table S8. Atomic coordinates ( $\times 10^4$ ) and equivalent isotropic displacement parameters ( $\text{\AA}^2 \times 10^3$ ) for **5a**.  $U(\text{eq})$  is defined as one third of the trace of the orthogonalized  $U^{ij}$  tensor.

|       | x       | y       | z       | $U(\text{eq})$ |
|-------|---------|---------|---------|----------------|
| O(1)  | 7586(1) | 4515(1) | 7896(1) | 28(1)          |
| O(2)  | 9391(1) | 3112(1) | 7498(1) | 33(1)          |
| O(3)  | 8074(1) | 2346(1) | 5805(1) | 26(1)          |
| O(4)  | 5210(1) | 3455(1) | 5777(1) | 39(1)          |
| O(5)  | 6275(1) | 2471(1) | 7450(1) | 34(1)          |
| N(1)  | 7754(1) | 5733(1) | 7726(1) | 27(1)          |
| C(1)  | 7355(1) | 3934(1) | 6711(1) | 22(1)          |
| C(2)  | 7264(1) | 4898(1) | 5739(1) | 22(1)          |
| C(3)  | 8119(1) | 4853(1) | 4859(1) | 27(1)          |
| C(4)  | 8089(1) | 6024(1) | 4207(1) | 29(1)          |
| C(5)  | 8496(1) | 7013(1) | 5126(1) | 31(1)          |
| C(6)  | 7695(1) | 7102(1) | 6048(1) | 30(1)          |
| C(7)  | 7568(1) | 5934(1) | 6571(1) | 23(1)          |
| C(8)  | 8412(1) | 3084(1) | 6749(1) | 22(1)          |
| C(9)  | 8973(1) | 1457(1) | 5681(1) | 28(1)          |
| C(10) | 8644(2) | 337(1)  | 6164(2) | 57(1)          |
| C(11) | 6144(1) | 3266(1) | 6563(1) | 26(1)          |
| C(12) | 5199(1) | 1738(1) | 7424(2) | 39(1)          |
| C(13) | 5173(2) | 730(2)  | 6585(2) | 51(1)          |

Table S9. Bond lengths [ $\text{\AA}$ ] and angles [ $^\circ$ ] for **5a**.

|            |            |
|------------|------------|
| O(1)-N(1)  | 1.4358(15) |
| O(1)-C(1)  | 1.4436(15) |
| O(2)-C(8)  | 1.1962(15) |
| O(3)-C(8)  | 1.3297(15) |
| O(3)-C(9)  | 1.4687(16) |
| O(4)-C(11) | 1.1991(16) |
| O(5)-C(11) | 1.3281(16) |
| O(5)-C(12) | 1.4672(17) |
| N(1)-C(7)  | 1.2709(17) |



|                  |            |
|------------------|------------|
| C(1)-C(8)        | 1.5296(18) |
| C(1)-C(11)       | 1.5328(18) |
| C(1)-C(2)        | 1.5378(17) |
| C(2)-C(7)        | 1.4967(18) |
| C(2)-C(3)        | 1.5394(18) |
| C(2)-H(2A)       | 1.0000     |
| C(3)-C(4)        | 1.5302(18) |
| C(3)-H(3A)       | 0.9900     |
| C(3)-H(3B)       | 0.9900     |
| C(4)-C(5)        | 1.5214(19) |
| C(4)-H(4A)       | 0.9900     |
| C(4)-H(4B)       | 0.9900     |
| C(5)-C(6)        | 1.5328(19) |
| C(5)-H(5A)       | 0.9900     |
| C(5)-H(5B)       | 0.9900     |
| C(6)-C(7)        | 1.4892(19) |
| C(6)-H(6A)       | 0.9900     |
| C(6)-H(6B)       | 0.9900     |
| C(9)-C(10)       | 1.483(2)   |
| C(9)-H(9A)       | 0.9900     |
| C(9)-H(9B)       | 0.9900     |
| C(10)-H(10A)     | 0.9800     |
| C(10)-H(10B)     | 0.9800     |
| C(10)-H(10C)     | 0.9800     |
| C(12)-C(13)      | 1.487(2)   |
| C(12)-H(12A)     | 0.9900     |
| C(12)-H(12B)     | 0.9900     |
| C(13)-H(13A)     | 0.9800     |
| C(13)-H(13B)     | 0.9800     |
| C(13)-H(13C)     | 0.9800     |
| <br>             |            |
| N(1)-O(1)-C(1)   | 109.44(9)  |
| C(8)-O(3)-C(9)   | 117.35(10) |
| C(11)-O(5)-C(12) | 116.77(11) |
| C(7)-N(1)-O(1)   | 108.60(10) |
| O(1)-C(1)-C(8)   | 108.54(10) |
| O(1)-C(1)-C(11)  | 106.04(10) |
| C(8)-C(1)-C(11)  | 109.82(10) |

|                  |            |
|------------------|------------|
| O(1)-C(1)-C(2)   | 105.76(10) |
| C(8)-C(1)-C(2)   | 113.15(10) |
| C(11)-C(1)-C(2)  | 113.10(10) |
| C(7)-C(2)-C(1)   | 100.24(10) |
| C(7)-C(2)-C(3)   | 110.02(10) |
| C(1)-C(2)-C(3)   | 119.01(10) |
| C(7)-C(2)-H(2A)  | 109.0      |
| C(1)-C(2)-H(2A)  | 109.0      |
| C(3)-C(2)-H(2A)  | 109.0      |
| C(4)-C(3)-C(2)   | 109.34(11) |
| C(4)-C(3)-H(3A)  | 109.8      |
| C(2)-C(3)-H(3A)  | 109.8      |
| C(4)-C(3)-H(3B)  | 109.8      |
| C(2)-C(3)-H(3B)  | 109.8      |
| H(3A)-C(3)-H(3B) | 108.3      |
| C(5)-C(4)-C(3)   | 112.12(11) |
| C(5)-C(4)-H(4A)  | 109.2      |
| C(3)-C(4)-H(4A)  | 109.2      |
| C(5)-C(4)-H(4B)  | 109.2      |
| C(3)-C(4)-H(4B)  | 109.2      |
| H(4A)-C(4)-H(4B) | 107.9      |
| C(4)-C(5)-C(6)   | 112.05(11) |
| C(4)-C(5)-H(5A)  | 109.2      |
| C(6)-C(5)-H(5A)  | 109.2      |
| C(4)-C(5)-H(5B)  | 109.2      |
| C(6)-C(5)-H(5B)  | 109.2      |
| H(5A)-C(5)-H(5B) | 107.9      |
| C(7)-C(6)-C(5)   | 109.52(11) |
| C(7)-C(6)-H(6A)  | 109.8      |
| C(5)-C(6)-H(6A)  | 109.8      |
| C(7)-C(6)-H(6B)  | 109.8      |
| C(5)-C(6)-H(6B)  | 109.8      |
| H(6A)-C(6)-H(6B) | 108.2      |
| N(1)-C(7)-C(6)   | 123.70(12) |
| N(1)-C(7)-C(2)   | 115.69(12) |
| C(6)-C(7)-C(2)   | 120.55(11) |
| O(2)-C(8)-O(3)   | 126.28(12) |
| O(2)-C(8)-C(1)   | 124.51(12) |

|                     |            |
|---------------------|------------|
| O(3)-C(8)-C(1)      | 109.18(10) |
| O(3)-C(9)-C(10)     | 109.38(12) |
| O(3)-C(9)-H(9A)     | 109.8      |
| C(10)-C(9)-H(9A)    | 109.8      |
| O(3)-C(9)-H(9B)     | 109.8      |
| C(10)-C(9)-H(9B)    | 109.8      |
| H(9A)-C(9)-H(9B)    | 108.2      |
| C(9)-C(10)-H(10A)   | 109.5      |
| C(9)-C(10)-H(10B)   | 109.5      |
| H(10A)-C(10)-H(10B) | 109.5      |
| C(9)-C(10)-H(10C)   | 109.5      |
| H(10A)-C(10)-H(10C) | 109.5      |
| H(10B)-C(10)-H(10C) | 109.5      |
| O(4)-C(11)-O(5)     | 125.27(12) |
| O(4)-C(11)-C(1)     | 124.68(12) |
| O(5)-C(11)-C(1)     | 110.03(11) |
| O(5)-C(12)-C(13)    | 110.17(12) |
| O(5)-C(12)-H(12A)   | 109.6      |
| C(13)-C(12)-H(12A)  | 109.6      |
| O(5)-C(12)-H(12B)   | 109.6      |
| C(13)-C(12)-H(12B)  | 109.6      |
| H(12A)-C(12)-H(12B) | 108.1      |
| C(12)-C(13)-H(13A)  | 109.5      |
| C(12)-C(13)-H(13B)  | 109.5      |
| H(13A)-C(13)-H(13B) | 109.5      |
| C(12)-C(13)-H(13C)  | 109.5      |
| H(13A)-C(13)-H(13C) | 109.5      |
| H(13B)-C(13)-H(13C) | 109.5      |

---

Symmetry transformations used to generate equivalent atoms:

Table S10. Anisotropic displacement parameters ( $\text{\AA}^2 \times 10^3$ ) for **5a**. The anisotropic displacement factor exponent takes the form:  $-2\pi^2 [h^2 a^{*2}U^{11} + \dots + 2 h k a^* b^* U^{12}]$

|      | $U^{11}$ | $U^{22}$ | $U^{33}$ | $U^{23}$ | $U^{13}$ | $U^{12}$ |
|------|----------|----------|----------|----------|----------|----------|
| O(1) | 37(1)    | 25(1)    | 21(1)    | 0(1)     | 7(1)     | 3(1)     |
| O(2) | 24(1)    | 37(1)    | 33(1)    | -6(1)    | -4(1)    | 5(1)     |

|       |       |       |       |       |       |        |
|-------|-------|-------|-------|-------|-------|--------|
| O(3)  | 26(1) | 23(1) | 27(1) | -3(1) | 2(1)  | 3(1)   |
| O(4)  | 22(1) | 42(1) | 48(1) | 17(1) | 0(1)  | -2(1)  |
| O(5)  | 28(1) | 38(1) | 35(1) | 14(1) | 7(1)  | -4(1)  |
| N(1)  | 28(1) | 24(1) | 30(1) | -3(1) | 8(1)  | 0(1)   |
| C(1)  | 23(1) | 23(1) | 19(1) | 0(1)  | 4(1)  | 1(1)   |
| C(2)  | 20(1) | 20(1) | 23(1) | 1(1)  | 2(1)  | 1(1)   |
| C(3)  | 32(1) | 25(1) | 23(1) | 1(1)  | 9(1)  | 2(1)   |
| C(4)  | 33(1) | 28(1) | 26(1) | 4(1)  | 8(1)  | 0(1)   |
| C(5)  | 30(1) | 28(1) | 32(1) | 4(1)  | 7(1)  | -6(1)  |
| C(6)  | 34(1) | 22(1) | 33(1) | -3(1) | 8(1)  | -4(1)  |
| C(7)  | 20(1) | 24(1) | 26(1) | -3(1) | 6(1)  | 0(1)   |
| C(8)  | 24(1) | 21(1) | 22(1) | 3(1)  | 5(1)  | -1(1)  |
| C(9)  | 29(1) | 26(1) | 30(1) | -2(1) | 10(1) | 5(1)   |
| C(10) | 67(1) | 31(1) | 86(1) | 18(1) | 42(1) | 17(1)  |
| C(11) | 24(1) | 25(1) | 28(1) | 4(1)  | 8(1)  | 3(1)   |
| C(12) | 30(1) | 42(1) | 48(1) | 15(1) | 16(1) | -5(1)  |
| C(13) | 42(1) | 41(1) | 75(1) | 4(1)  | 25(1) | -10(1) |

Table S11. Hydrogen coordinates ( $\times 10^4$ ) and isotropic displacement parameters ( $\text{\AA}^2 \times 10^{-3}$ ) for **5a**.

|        | x    | y    | z    | U(eq) |
|--------|------|------|------|-------|
| H(2A)  | 6388 | 4961 | 5233 | 26    |
| H(3A)  | 8973 | 4674 | 5338 | 32    |
| H(3B)  | 7842 | 4233 | 4234 | 32    |
| H(4A)  | 8639 | 5992 | 3641 | 35    |
| H(4B)  | 7240 | 6177 | 3699 | 35    |
| H(5A)  | 8448 | 7752 | 4663 | 37    |
| H(5B)  | 9367 | 6891 | 5590 | 37    |
| H(6A)  | 8081 | 7643 | 6726 | 36    |
| H(6B)  | 6869 | 7407 | 5620 | 36    |
| H(9A)  | 9812 | 1694 | 6153 | 34    |
| H(9B)  | 8972 | 1372 | 4796 | 34    |
| H(10A) | 9239 | -258 | 6075 | 85    |
| H(10B) | 7813 | 107  | 5694 | 85    |
| H(10C) | 8662 | 422  | 7044 | 85    |

|        |      |      |      |    |
|--------|------|------|------|----|
| H(12A) | 4433 | 2198 | 7128 | 47 |
| H(12B) | 5237 | 1459 | 8273 | 47 |
| H(13A) | 4461 | 238  | 6588 | 77 |
| H(13B) | 5935 | 280  | 6875 | 77 |
| H(13C) | 5107 | 1008 | 5739 | 77 |

Table S12. Torsion angles [°] for **5a**.

|                      |             |
|----------------------|-------------|
| C(1)-O(1)-N(1)-C(7)  | 4.12(13)    |
| N(1)-O(1)-C(1)-C(8)  | 116.41(10)  |
| N(1)-O(1)-C(1)-C(11) | -125.65(10) |
| N(1)-O(1)-C(1)-C(2)  | -5.29(12)   |
| O(1)-C(1)-C(2)-C(7)  | 4.31(12)    |
| C(8)-C(1)-C(2)-C(7)  | -114.38(11) |
| C(11)-C(1)-C(2)-C(7) | 119.94(11)  |
| O(1)-C(1)-C(2)-C(3)  | 124.17(12)  |
| C(8)-C(1)-C(2)-C(3)  | 5.48(16)    |
| C(11)-C(1)-C(2)-C(3) | -120.20(12) |
| C(7)-C(2)-C(3)-C(4)  | -51.64(14)  |
| C(1)-C(2)-C(3)-C(4)  | -166.37(11) |
| C(2)-C(3)-C(4)-C(5)  | 58.93(15)   |
| C(3)-C(4)-C(5)-C(6)  | -57.94(16)  |
| C(4)-C(5)-C(6)-C(7)  | 48.22(15)   |
| O(1)-N(1)-C(7)-C(6)  | -178.27(11) |
| O(1)-N(1)-C(7)-C(2)  | -1.07(15)   |
| C(5)-C(6)-C(7)-N(1)  | 130.62(13)  |
| C(5)-C(6)-C(7)-C(2)  | -46.44(16)  |
| C(1)-C(2)-C(7)-N(1)  | -2.11(14)   |
| C(3)-C(2)-C(7)-N(1)  | -128.29(12) |
| C(1)-C(2)-C(7)-C(6)  | 175.18(11)  |
| C(3)-C(2)-C(7)-C(6)  | 49.00(15)   |
| C(9)-O(3)-C(8)-O(2)  | 1.68(19)    |
| C(9)-O(3)-C(8)-C(1)  | 179.85(10)  |
| O(1)-C(1)-C(8)-O(2)  | -17.11(17)  |
| C(11)-C(1)-C(8)-O(2) | -132.62(13) |
| C(2)-C(1)-C(8)-O(2)  | 99.96(14)   |
| O(1)-C(1)-C(8)-O(3)  | 164.67(10)  |

|                        |             |
|------------------------|-------------|
| C(11)-C(1)-C(8)-O(3)   | 49.16(13)   |
| C(2)-C(1)-C(8)-O(3)    | -78.26(13)  |
| C(8)-O(3)-C(9)-C(10)   | 101.31(15)  |
| C(12)-O(5)-C(11)-O(4)  | 2.7(2)      |
| C(12)-O(5)-C(11)-C(1)  | -178.83(11) |
| O(1)-C(1)-C(11)-O(4)   | 115.72(14)  |
| C(8)-C(1)-C(11)-O(4)   | -127.19(14) |
| C(2)-C(1)-C(11)-O(4)   | 0.26(19)    |
| O(1)-C(1)-C(11)-O(5)   | -62.73(13)  |
| C(8)-C(1)-C(11)-O(5)   | 54.36(14)   |
| C(2)-C(1)-C(11)-O(5)   | -178.20(10) |
| C(11)-O(5)-C(12)-C(13) | 85.64(16)   |

---

Symmetry transformations used to generate equivalent atoms:

Table S13. Crystal data and structure refinement for **7b**.

|                                 |                                                                                |                 |
|---------------------------------|--------------------------------------------------------------------------------|-----------------|
| Identification code             | <b>7b</b>                                                                      |                 |
| Empirical formula               | C <sub>13</sub> H <sub>20</sub> B F <sub>3</sub> N <sub>2</sub> O <sub>3</sub> |                 |
| Formula weight                  | 320.12                                                                         |                 |
| Temperature                     | 150(2) K                                                                       |                 |
| Wavelength                      | 1.54178 Å                                                                      |                 |
| Crystal system                  | Monoclinic                                                                     |                 |
| Space group                     | C2/c                                                                           |                 |
| Unit cell dimensions            | a = 31.0762(14) Å                                                              | α = 90°.        |
|                                 | b = 9.4685(4) Å                                                                | β = 91.156(2)°. |
|                                 | c = 12.1756(5) Å                                                               | γ = 90°.        |
| Volume                          | 3581.9(3) Å <sup>3</sup>                                                       |                 |
| Z                               | 8                                                                              |                 |
| Density (calculated)            | 1.187 Mg/m <sup>3</sup>                                                        |                 |
| Absorption coefficient          | 0.888 mm <sup>-1</sup>                                                         |                 |
| F(000)                          | 1344                                                                           |                 |
| Crystal size                    | 0.260 x 0.130 x 0.020 mm <sup>3</sup>                                          |                 |
| Theta range for data collection | 2.844 to 65.997°.                                                              |                 |
| Index ranges                    | -36 ≤ h ≤ 36, -11 ≤ k ≤ 11, -14 ≤ l ≤ 14                                       |                 |
| Reflections collected           | 32058                                                                          |                 |
| Independent reflections         | 3076 [R(int) = 0.0364]                                                         |                 |
| Completeness to theta = 65.997° | 98.3 %                                                                         |                 |
| Absorption correction           | Semi-empirical from equivalents                                                |                 |

|                                   |                                             |
|-----------------------------------|---------------------------------------------|
| Max. and min. transmission        | 0.7527 and 0.5999                           |
| Refinement method                 | Full-matrix least-squares on F <sup>2</sup> |
| Data / restraints / parameters    | 3076 / 0 / 201                              |
| Goodness-of-fit on F <sup>2</sup> | 1.051                                       |
| Final R indices [I>2sigma(I)]     | R1 = 0.0451, wR2 = 0.1210                   |
| R indices (all data)              | R1 = 0.0504, wR2 = 0.1240                   |
| Extinction coefficient            | n/a                                         |
| Largest diff. peak and hole       | 0.238 and -0.234 e.Å <sup>-3</sup>          |

Table S14. Atomic coordinates (x 10<sup>4</sup>) and equivalent isotropic displacement parameters (Å<sup>2</sup>x 10<sup>3</sup>) for **7b**. U(eq) is defined as one third of the trace of the orthogonalized U<sup>ij</sup> tensor.

|       | x       | y       | z       | U(eq) |
|-------|---------|---------|---------|-------|
| F(1)  | 6104(1) | 3129(1) | 6933(1) | 43(1) |
| F(2)  | 6800(1) | 3114(1) | 6453(1) | 45(1) |
| F(3)  | 7021(1) | 8202(1) | 7746(1) | 60(1) |
| O(1)  | 6585(1) | 4685(1) | 7838(1) | 31(1) |
| O(2)  | 6375(1) | 5129(1) | 6028(1) | 33(1) |
| O(3)  | 6311(1) | 9896(2) | 4627(1) | 71(1) |
| N(1)  | 6289(1) | 7469(2) | 5976(1) | 33(1) |
| N(2)  | 4727(1) | 6402(3) | 9103(2) | 63(1) |
| C(1)  | 6570(1) | 6171(2) | 7709(1) | 29(1) |
| C(2)  | 6395(1) | 6333(2) | 6518(2) | 29(1) |
| C(3)  | 6238(1) | 8891(2) | 6443(2) | 47(1) |
| C(4)  | 6462(1) | 9951(3) | 5739(2) | 70(1) |
| C(5)  | 6164(1) | 7400(2) | 4797(2) | 38(1) |
| C(6)  | 6398(1) | 8534(2) | 4185(2) | 53(1) |
| C(7)  | 7045(1) | 6715(2) | 7806(2) | 39(1) |
| C(8)  | 7245(1) | 6326(3) | 8906(2) | 59(1) |
| C(9)  | 7324(1) | 6243(3) | 6871(2) | 49(1) |
| C(10) | 6280(1) | 6778(2) | 8598(1) | 30(1) |
| C(11) | 5806(1) | 6408(2) | 8416(2) | 33(1) |
| C(12) | 5551(1) | 6804(3) | 9429(2) | 41(1) |
| C(13) | 5088(1) | 6583(3) | 9255(2) | 46(1) |
| B(1)  | 6473(1) | 3942(2) | 6850(2) | 33(1) |

Table S15. Bond lengths [ $\text{\AA}$ ] and angles [ $^\circ$ ] for **7b**.

---

|              |          |
|--------------|----------|
| F(1)-B(1)    | 1.386(3) |
| F(2)-B(1)    | 1.378(3) |
| F(3)-C(7)    | 1.411(3) |
| O(1)-C(1)    | 1.417(2) |
| O(1)-B(1)    | 1.430(2) |
| O(2)-C(2)    | 1.288(2) |
| O(2)-B(1)    | 1.531(2) |
| O(3)-C(6)    | 1.425(3) |
| O(3)-C(4)    | 1.426(3) |
| N(1)-C(2)    | 1.301(2) |
| N(1)-C(3)    | 1.472(2) |
| N(1)-C(5)    | 1.481(3) |
| N(2)-C(13)   | 1.145(3) |
| C(1)-C(10)   | 1.532(2) |
| C(1)-C(2)    | 1.545(2) |
| C(1)-C(7)    | 1.566(3) |
| C(3)-C(4)    | 1.501(3) |
| C(3)-H(3A)   | 0.9900   |
| C(3)-H(3B)   | 0.9900   |
| C(4)-H(4A)   | 0.9900   |
| C(4)-H(4B)   | 0.9900   |
| C(5)-C(6)    | 1.504(3) |
| C(5)-H(5A)   | 0.9900   |
| C(5)-H(5B)   | 0.9900   |
| C(6)-H(6A)   | 0.9900   |
| C(6)-H(6B)   | 0.9900   |
| C(7)-C(8)    | 1.512(3) |
| C(7)-C(9)    | 1.512(3) |
| C(8)-H(8A)   | 0.9800   |
| C(8)-H(8B)   | 0.9800   |
| C(8)-H(8C)   | 0.9800   |
| C(9)-H(9A)   | 0.9800   |
| C(9)-H(9B)   | 0.9800   |
| C(9)-H(9C)   | 0.9800   |
| C(10)-C(11)  | 1.527(3) |
| C(10)-H(10A) | 0.9900   |



|                  |            |
|------------------|------------|
| C(10)-H(10B)     | 0.9900     |
| C(11)-C(12)      | 1.527(3)   |
| C(11)-H(11A)     | 0.9900     |
| C(11)-H(11B)     | 0.9900     |
| C(12)-C(13)      | 1.465(3)   |
| C(12)-H(12A)     | 0.9900     |
| C(12)-H(12B)     | 0.9900     |
|                  |            |
| C(1)-O(1)-B(1)   | 112.87(14) |
| C(2)-O(2)-B(1)   | 109.86(14) |
| C(6)-O(3)-C(4)   | 109.2(2)   |
| C(2)-N(1)-C(3)   | 126.03(16) |
| C(2)-N(1)-C(5)   | 120.95(16) |
| C(3)-N(1)-C(5)   | 112.76(16) |
| O(1)-C(1)-C(10)  | 108.22(14) |
| O(1)-C(1)-C(2)   | 102.24(13) |
| C(10)-C(1)-C(2)  | 115.21(15) |
| O(1)-C(1)-C(7)   | 106.85(15) |
| C(10)-C(1)-C(7)  | 112.91(15) |
| C(2)-C(1)-C(7)   | 110.50(15) |
| O(2)-C(2)-N(1)   | 119.15(16) |
| O(2)-C(2)-C(1)   | 111.12(15) |
| N(1)-C(2)-C(1)   | 129.68(16) |
| N(1)-C(3)-C(4)   | 109.63(19) |
| N(1)-C(3)-H(3A)  | 109.7      |
| C(4)-C(3)-H(3A)  | 109.7      |
| N(1)-C(3)-H(3B)  | 109.7      |
| C(4)-C(3)-H(3B)  | 109.7      |
| H(3A)-C(3)-H(3B) | 108.2      |
| O(3)-C(4)-C(3)   | 111.7(2)   |
| O(3)-C(4)-H(4A)  | 109.3      |
| C(3)-C(4)-H(4A)  | 109.3      |
| O(3)-C(4)-H(4B)  | 109.3      |
| C(3)-C(4)-H(4B)  | 109.3      |
| H(4A)-C(4)-H(4B) | 107.9      |
| N(1)-C(5)-C(6)   | 109.13(18) |
| N(1)-C(5)-H(5A)  | 109.9      |
| C(6)-C(5)-H(5A)  | 109.9      |

|                     |            |
|---------------------|------------|
| N(1)-C(5)-H(5B)     | 109.9      |
| C(6)-C(5)-H(5B)     | 109.9      |
| H(5A)-C(5)-H(5B)    | 108.3      |
| O(3)-C(6)-C(5)      | 111.16(19) |
| O(3)-C(6)-H(6A)     | 109.4      |
| C(5)-C(6)-H(6A)     | 109.4      |
| O(3)-C(6)-H(6B)     | 109.4      |
| C(5)-C(6)-H(6B)     | 109.4      |
| H(6A)-C(6)-H(6B)    | 108.0      |
| F(3)-C(7)-C(8)      | 107.98(19) |
| F(3)-C(7)-C(9)      | 106.62(18) |
| C(8)-C(7)-C(9)      | 111.24(19) |
| F(3)-C(7)-C(1)      | 106.09(16) |
| C(8)-C(7)-C(1)      | 110.98(17) |
| C(9)-C(7)-C(1)      | 113.55(17) |
| C(7)-C(8)-H(8A)     | 109.5      |
| C(7)-C(8)-H(8B)     | 109.5      |
| H(8A)-C(8)-H(8B)    | 109.5      |
| C(7)-C(8)-H(8C)     | 109.5      |
| H(8A)-C(8)-H(8C)    | 109.5      |
| H(8B)-C(8)-H(8C)    | 109.5      |
| C(7)-C(9)-H(9A)     | 109.5      |
| C(7)-C(9)-H(9B)     | 109.5      |
| H(9A)-C(9)-H(9B)    | 109.5      |
| C(7)-C(9)-H(9C)     | 109.5      |
| H(9A)-C(9)-H(9C)    | 109.5      |
| H(9B)-C(9)-H(9C)    | 109.5      |
| C(11)-C(10)-C(1)    | 112.97(14) |
| C(11)-C(10)-H(10A)  | 109.0      |
| C(1)-C(10)-H(10A)   | 109.0      |
| C(11)-C(10)-H(10B)  | 109.0      |
| C(1)-C(10)-H(10B)   | 109.0      |
| H(10A)-C(10)-H(10B) | 107.8      |
| C(12)-C(11)-C(10)   | 110.02(15) |
| C(12)-C(11)-H(11A)  | 109.7      |
| C(10)-C(11)-H(11A)  | 109.7      |
| C(12)-C(11)-H(11B)  | 109.7      |
| C(10)-C(11)-H(11B)  | 109.7      |

|                     |            |
|---------------------|------------|
| H(11A)-C(11)-H(11B) | 108.2      |
| C(13)-C(12)-C(11)   | 111.90(17) |
| C(13)-C(12)-H(12A)  | 109.2      |
| C(11)-C(12)-H(12A)  | 109.2      |
| C(13)-C(12)-H(12B)  | 109.2      |
| C(11)-C(12)-H(12B)  | 109.2      |
| H(12A)-C(12)-H(12B) | 107.9      |
| N(2)-C(13)-C(12)    | 178.9(2)   |
| F(2)-B(1)-F(1)      | 109.01(17) |
| F(2)-B(1)-O(1)      | 114.02(17) |
| F(1)-B(1)-O(1)      | 113.49(16) |
| F(2)-B(1)-O(2)      | 109.09(16) |
| F(1)-B(1)-O(2)      | 107.50(16) |
| O(1)-B(1)-O(2)      | 103.32(15) |

---

Symmetry transformations used to generate equivalent atoms:

Table S16. Anisotropic displacement parameters ( $\text{\AA}^2 \times 10^3$ ) for **7b**. The anisotropic displacement factor exponent takes the form:  $-2\pi^2 [ h^2 a^{*2} U^{11} + \dots + 2 h k a^* b^* U^{12} ]$

|      | $U^{11}$ | $U^{22}$ | $U^{33}$ | $U^{23}$ | $U^{13}$ | $U^{12}$ |
|------|----------|----------|----------|----------|----------|----------|
| F(1) | 53(1)    | 35(1)    | 41(1)    | 2(1)     | -9(1)    | -9(1)    |
| F(2) | 61(1)    | 36(1)    | 39(1)    | -7(1)    | 2(1)     | 15(1)    |
| F(3) | 51(1)    | 41(1)    | 88(1)    | -15(1)   | 14(1)    | -19(1)   |
| O(1) | 39(1)    | 27(1)    | 26(1)    | -3(1)    | -2(1)    | 1(1)     |
| O(2) | 50(1)    | 23(1)    | 25(1)    | -4(1)    | -2(1)    | 2(1)     |
| O(3) | 139(2)   | 28(1)    | 48(1)    | 6(1)     | 7(1)     | -9(1)    |
| N(1) | 45(1)    | 25(1)    | 28(1)    | -3(1)    | 5(1)     | -1(1)    |
| N(2) | 36(1)    | 105(2)   | 49(1)    | 2(1)     | 0(1)     | 8(1)     |
| C(1) | 32(1)    | 26(1)    | 28(1)    | -4(1)    | 1(1)     | -2(1)    |
| C(2) | 33(1)    | 25(1)    | 28(1)    | -4(1)    | 5(1)     | -2(1)    |
| C(3) | 78(2)    | 24(1)    | 38(1)    | -4(1)    | 7(1)     | 6(1)     |
| C(4) | 124(3)   | 31(1)    | 54(2)    | -3(1)    | 5(2)     | -20(1)   |
| C(5) | 56(1)    | 30(1)    | 29(1)    | 2(1)     | 1(1)     | 0(1)     |
| C(6) | 86(2)    | 36(1)    | 38(1)    | 3(1)     | 14(1)    | -8(1)    |
| C(7) | 35(1)    | 40(1)    | 43(1)    | -8(1)    | 5(1)     | -9(1)    |
| C(8) | 35(1)    | 97(2)    | 46(1)    | -9(1)    | -5(1)    | -18(1)   |

|       |       |       |       |       |       |       |
|-------|-------|-------|-------|-------|-------|-------|
| C(9)  | 36(1) | 63(2) | 49(1) | -2(1) | 11(1) | -2(1) |
| C(10) | 34(1) | 31(1) | 26(1) | -6(1) | 1(1)  | -2(1) |
| C(11) | 32(1) | 39(1) | 30(1) | -5(1) | 0(1)  | 1(1)  |
| C(12) | 32(1) | 57(1) | 34(1) | -3(1) | 2(1)  | 3(1)  |
| C(13) | 39(1) | 66(2) | 34(1) | 3(1)  | 3(1)  | 10(1) |
| B(1)  | 45(1) | 27(1) | 28(1) | -1(1) | -2(1) | 3(1)  |

Table S17. Hydrogen coordinates ( $\times 10^4$ ) and isotropic displacement parameters ( $\text{\AA}^2 \times 10^{-3}$ ) for **7b**.

|        | x    | y     | z     | U(eq) |
|--------|------|-------|-------|-------|
| H(3A)  | 6362 | 8916  | 7198  | 56    |
| H(3B)  | 5929 | 9128  | 6481  | 56    |
| H(4A)  | 6414 | 10910 | 6036  | 84    |
| H(4B)  | 6776 | 9764  | 5765  | 84    |
| H(5A)  | 5849 | 7538  | 4709  | 46    |
| H(5B)  | 6237 | 6461  | 4497  | 46    |
| H(6A)  | 6712 | 8350  | 4232  | 64    |
| H(6B)  | 6309 | 8511  | 3400  | 64    |
| H(8A)  | 7548 | 6623  | 8929  | 89    |
| H(8B)  | 7229 | 5301  | 9008  | 89    |
| H(8C)  | 7090 | 6800  | 9493  | 89    |
| H(9A)  | 7613 | 6639  | 6969  | 74    |
| H(9B)  | 7197 | 6573  | 6173  | 74    |
| H(9C)  | 7341 | 5209  | 6865  | 74    |
| H(10A) | 6378 | 6411  | 9323  | 36    |
| H(10B) | 6312 | 7818  | 8611  | 36    |
| H(11A) | 5690 | 6926  | 7767  | 40    |
| H(11B) | 5776 | 5384  | 8271  | 40    |
| H(12A) | 5652 | 6226  | 10060 | 49    |
| H(12B) | 5604 | 7809  | 9611  | 49    |

Table S18. Torsion angles [°] for **7b**.

---

|                        |             |
|------------------------|-------------|
| B(1)-O(1)-C(1)-C(10)   | 126.53(16)  |
| B(1)-O(1)-C(1)-C(2)    | 4.50(19)    |
| B(1)-O(1)-C(1)-C(7)    | -111.61(17) |
| B(1)-O(2)-C(2)-N(1)    | -174.74(17) |
| B(1)-O(2)-C(2)-C(1)    | 7.6(2)      |
| C(3)-N(1)-C(2)-O(2)    | 171.21(19)  |
| C(5)-N(1)-C(2)-O(2)    | -2.6(3)     |
| C(3)-N(1)-C(2)-C(1)    | -11.6(3)    |
| C(5)-N(1)-C(2)-C(1)    | 174.56(18)  |
| O(1)-C(1)-C(2)-O(2)    | -7.63(19)   |
| C(10)-C(1)-C(2)-O(2)   | -124.75(17) |
| C(7)-C(1)-C(2)-O(2)    | 105.81(18)  |
| O(1)-C(1)-C(2)-N(1)    | 175.03(18)  |
| C(10)-C(1)-C(2)-N(1)   | 57.9(3)     |
| C(7)-C(1)-C(2)-N(1)    | -71.5(2)    |
| C(2)-N(1)-C(3)-C(4)    | 134.0(2)    |
| C(5)-N(1)-C(3)-C(4)    | -51.7(3)    |
| C(6)-O(3)-C(4)-C(3)    | -61.6(3)    |
| N(1)-C(3)-C(4)-O(3)    | 56.0(3)     |
| C(2)-N(1)-C(5)-C(6)    | -133.0(2)   |
| C(3)-N(1)-C(5)-C(6)    | 52.4(2)     |
| C(4)-O(3)-C(6)-C(5)    | 62.3(3)     |
| N(1)-C(5)-C(6)-O(3)    | -57.3(3)    |
| O(1)-C(1)-C(7)-F(3)    | -176.35(14) |
| C(10)-C(1)-C(7)-F(3)   | -57.5(2)    |
| C(2)-C(1)-C(7)-F(3)    | 73.18(19)   |
| O(1)-C(1)-C(7)-C(8)    | -59.3(2)    |
| C(10)-C(1)-C(7)-C(8)   | 59.6(2)     |
| C(2)-C(1)-C(7)-C(8)    | -169.78(18) |
| O(1)-C(1)-C(7)-C(9)    | 66.9(2)     |
| C(10)-C(1)-C(7)-C(9)   | -174.26(18) |
| C(2)-C(1)-C(7)-C(9)    | -43.6(2)    |
| O(1)-C(1)-C(10)-C(11)  | -69.65(19)  |
| C(2)-C(1)-C(10)-C(11)  | 44.0(2)     |
| C(7)-C(1)-C(10)-C(11)  | 172.29(16)  |
| C(1)-C(10)-C(11)-C(12) | 169.54(16)  |

|                         |             |
|-------------------------|-------------|
| C(10)-C(11)-C(12)-C(13) | 175.01(18)  |
| C(1)-O(1)-B(1)-F(2)     | 117.69(18)  |
| C(1)-O(1)-B(1)-F(1)     | -116.67(18) |
| C(1)-O(1)-B(1)-O(2)     | -0.6(2)     |
| C(2)-O(2)-B(1)-F(2)     | -126.22(17) |
| C(2)-O(2)-B(1)-F(1)     | 115.71(17)  |
| C(2)-O(2)-B(1)-O(1)     | -4.6(2)     |

---

Symmetry transformations used to generate equivalent atoms:

Table S19. Crystal data and structure refinement for *cis-1r*.

|                                   |                                                                 |          |
|-----------------------------------|-----------------------------------------------------------------|----------|
| Identification code               | <b><i>cis-1r</i></b>                                            |          |
| Empirical formula                 | C <sub>22</sub> H <sub>34</sub> N <sub>2</sub> O <sub>5</sub> S |          |
| Formula weight                    | 438.57                                                          |          |
| Temperature                       | 150(2) K                                                        |          |
| Wavelength                        | 1.54178 Å                                                       |          |
| Crystal system                    | Orthorhombic                                                    |          |
| Space group                       | Pbca                                                            |          |
| Unit cell dimensions              | a = 16.6170(5) Å                                                | α = 90°. |
|                                   | b = 11.8972(3) Å                                                | β = 90°. |
|                                   | c = 22.9385(7) Å                                                | γ = 90°. |
| Volume                            | 4534.8(2) Å <sup>3</sup>                                        |          |
| Z                                 | 8                                                               |          |
| Density (calculated)              | 1.285 Mg/m <sup>3</sup>                                         |          |
| Absorption coefficient            | 1.559 mm <sup>-1</sup>                                          |          |
| F(000)                            | 1888                                                            |          |
| Crystal size                      | 0.260 x 0.120 x 0.060 mm <sup>3</sup>                           |          |
| Theta range for data collection   | 3.854 to 66.365°.                                               |          |
| Index ranges                      | -19 ≤ h ≤ 17, -12 ≤ k ≤ 14, -27 ≤ l ≤ 25                        |          |
| Reflections collected             | 47355                                                           |          |
| Independent reflections           | 3931 [R(int) = 0.0492]                                          |          |
| Completeness to theta = 66.365°   | 98.8 %                                                          |          |
| Absorption correction             | Semi-empirical from equivalents                                 |          |
| Max. and min. transmission        | 0.7528 and 0.6205                                               |          |
| Refinement method                 | Full-matrix least-squares on F <sup>2</sup>                     |          |
| Data / restraints / parameters    | 3931 / 0 / 281                                                  |          |
| Goodness-of-fit on F <sup>2</sup> | 1.050                                                           |          |
| Final R indices [I > 2σ(I)]       | R1 = 0.0525, wR2 = 0.1348                                       |          |

|                             |                                    |
|-----------------------------|------------------------------------|
| R indices (all data)        | R1 = 0.0595, wR2 = 0.1402          |
| Extinction coefficient      | n/a                                |
| Largest diff. peak and hole | 1.072 and -0.666 e.Å <sup>-3</sup> |

Table S20. Atomic coordinates ( $\times 10^4$ ) and equivalent isotropic displacement parameters ( $\text{\AA}^2 \times 10^3$ ) for *cis-1r*. U(eq) is defined as one third of the trace of the orthogonalized  $U^{ij}$  tensor.

|       | x       | y       | z       | U(eq) |
|-------|---------|---------|---------|-------|
| O(1)  | 2920(1) | 8069(1) | 8231(1) | 25(1) |
| O(2)  | 2984(1) | 5018(2) | 6143(1) | 36(1) |
| O(3)  | 2614(1) | 5190(1) | 7979(1) | 27(1) |
| O(4)  | 5705(1) | 8925(2) | 5321(1) | 37(1) |
| N(1)  | 3344(1) | 5631(2) | 6608(1) | 26(1) |
| N(2)  | 2540(1) | 6146(1) | 8822(1) | 21(1) |
| C(1)  | 2621(1) | 7195(2) | 7871(1) | 21(1) |
| C(2)  | 1751(1) | 7437(2) | 7673(1) | 25(1) |
| C(3)  | 1427(1) | 6555(2) | 7255(1) | 28(1) |
| C(4)  | 1969(1) | 6392(2) | 6720(1) | 28(1) |
| C(5)  | 2844(1) | 6264(2) | 6874(1) | 22(1) |
| C(6)  | 3204(1) | 7044(2) | 7334(1) | 20(1) |
| C(7)  | 2601(1) | 6110(2) | 8237(1) | 21(1) |
| C(8)  | 2532(1) | 5076(2) | 9145(1) | 23(1) |
| C(9)  | 2626(2) | 5432(2) | 9778(1) | 32(1) |
| C(10) | 2194(2) | 6560(2) | 9796(1) | 32(1) |
| C(11) | 2428(2) | 7115(2) | 9223(1) | 28(1) |
| C(12) | 3294(1) | 8234(2) | 7043(1) | 25(1) |
| C(13) | 3929(1) | 8352(2) | 6579(1) | 23(1) |
| C(14) | 4668(2) | 8851(2) | 6705(1) | 29(1) |
| C(15) | 5246(2) | 9029(2) | 6281(1) | 31(1) |
| C(16) | 5097(2) | 8698(2) | 5709(1) | 27(1) |
| C(17) | 4376(2) | 8195(2) | 5570(1) | 30(1) |
| C(18) | 3799(1) | 8030(2) | 6003(1) | 28(1) |
| C(19) | 4025(1) | 6630(2) | 7546(1) | 24(1) |
| C(20) | 5582(2) | 8614(2) | 4728(1) | 41(1) |
| S(1)  | 5164(1) | 4399(1) | 5814(1) | 38(1) |
| O(5)  | 4350(1) | 4368(2) | 5529(1) | 52(1) |
| C(21) | 4997(2) | 3863(3) | 6509(2) | 69(1) |

C(22)                                      5324(2)                                      5800(2)                                      6024(2)                                      48(1)

---

Table S21. Bond lengths [Å] and angles [°] for *cis-1r*.

---

|             |          |
|-------------|----------|
| O(1)-C(1)   | 1.418(3) |
| O(1)-H(1O)  | 0.79(3)  |
| O(2)-N(1)   | 1.424(2) |
| O(2)-H(2O)  | 0.91(5)  |
| O(3)-C(7)   | 1.244(3) |
| O(4)-C(16)  | 1.374(3) |
| O(4)-C(20)  | 1.424(3) |
| N(1)-C(5)   | 1.278(3) |
| N(2)-C(7)   | 1.345(3) |
| N(2)-C(8)   | 1.473(3) |
| N(2)-C(11)  | 1.488(3) |
| C(1)-C(7)   | 1.541(3) |
| C(1)-C(2)   | 1.543(3) |
| C(1)-C(6)   | 1.577(3) |
| C(2)-C(3)   | 1.521(3) |
| C(2)-H(2A)  | 0.9900   |
| C(2)-H(2B)  | 0.9900   |
| C(3)-C(4)   | 1.535(3) |
| C(3)-H(3A)  | 0.9900   |
| C(3)-H(3B)  | 0.9900   |
| C(4)-C(5)   | 1.503(3) |
| C(4)-H(4A)  | 0.9900   |
| C(4)-H(4B)  | 0.9900   |
| C(5)-C(6)   | 1.526(3) |
| C(6)-C(19)  | 1.530(3) |
| C(6)-C(12)  | 1.572(3) |
| C(8)-C(9)   | 1.521(3) |
| C(8)-H(8A)  | 0.9900   |
| C(8)-H(8B)  | 0.9900   |
| C(9)-C(10)  | 1.524(4) |
| C(9)-H(9A)  | 0.9900   |
| C(9)-H(9B)  | 0.9900   |
| C(10)-C(11) | 1.521(3) |



|                  |            |
|------------------|------------|
| C(10)-H(10A)     | 0.9900     |
| C(10)-H(10B)     | 0.9900     |
| C(11)-H(11A)     | 0.9900     |
| C(11)-H(11B)     | 0.9900     |
| C(12)-C(13)      | 1.506(3)   |
| C(12)-H(12A)     | 0.9900     |
| C(12)-H(12B)     | 0.9900     |
| C(13)-C(18)      | 1.391(3)   |
| C(13)-C(14)      | 1.394(3)   |
| C(14)-C(15)      | 1.384(3)   |
| C(14)-H(14A)     | 0.9500     |
| C(15)-C(16)      | 1.390(4)   |
| C(15)-H(15A)     | 0.9500     |
| C(16)-C(17)      | 1.378(4)   |
| C(17)-C(18)      | 1.394(3)   |
| C(17)-H(17A)     | 0.9500     |
| C(18)-H(18A)     | 0.9500     |
| C(19)-H(19A)     | 0.9800     |
| C(19)-H(19B)     | 0.9800     |
| C(19)-H(19C)     | 0.9800     |
| C(20)-H(20A)     | 0.9800     |
| C(20)-H(20B)     | 0.9800     |
| C(20)-H(20C)     | 0.9800     |
| S(1)-O(5)        | 1.502(2)   |
| S(1)-C(21)       | 1.739(4)   |
| S(1)-C(22)       | 1.755(3)   |
| C(21)-H(21A)     | 0.9800     |
| C(21)-H(21B)     | 0.9800     |
| C(21)-H(21C)     | 0.9800     |
| C(22)-H(22A)     | 0.9800     |
| C(22)-H(22B)     | 0.9800     |
| C(22)-H(22C)     | 0.9800     |
| C(1)-O(1)-H(10)  | 107(2)     |
| N(1)-O(2)-H(20)  | 100(3)     |
| C(16)-O(4)-C(20) | 117.6(2)   |
| C(5)-N(1)-O(2)   | 112.78(19) |
| C(7)-N(2)-C(8)   | 118.40(18) |

|                  |            |
|------------------|------------|
| C(7)-N(2)-C(11)  | 130.62(18) |
| C(8)-N(2)-C(11)  | 110.87(17) |
| O(1)-C(1)-C(7)   | 107.71(17) |
| O(1)-C(1)-C(2)   | 111.24(18) |
| C(7)-C(1)-C(2)   | 107.21(18) |
| O(1)-C(1)-C(6)   | 108.94(17) |
| C(7)-C(1)-C(6)   | 110.13(17) |
| C(2)-C(1)-C(6)   | 111.53(17) |
| C(3)-C(2)-C(1)   | 112.89(18) |
| C(3)-C(2)-H(2A)  | 109.0      |
| C(1)-C(2)-H(2A)  | 109.0      |
| C(3)-C(2)-H(2B)  | 109.0      |
| C(1)-C(2)-H(2B)  | 109.0      |
| H(2A)-C(2)-H(2B) | 107.8      |
| C(2)-C(3)-C(4)   | 112.50(19) |
| C(2)-C(3)-H(3A)  | 109.1      |
| C(4)-C(3)-H(3A)  | 109.1      |
| C(2)-C(3)-H(3B)  | 109.1      |
| C(4)-C(3)-H(3B)  | 109.1      |
| H(3A)-C(3)-H(3B) | 107.8      |
| C(5)-C(4)-C(3)   | 113.10(19) |
| C(5)-C(4)-H(4A)  | 109.0      |
| C(3)-C(4)-H(4A)  | 109.0      |
| C(5)-C(4)-H(4B)  | 109.0      |
| C(3)-C(4)-H(4B)  | 109.0      |
| H(4A)-C(4)-H(4B) | 107.8      |
| N(1)-C(5)-C(4)   | 125.2(2)   |
| N(1)-C(5)-C(6)   | 115.68(19) |
| C(4)-C(5)-C(6)   | 118.67(19) |
| C(5)-C(6)-C(19)  | 111.97(17) |
| C(5)-C(6)-C(12)  | 107.03(17) |
| C(19)-C(6)-C(12) | 109.90(18) |
| C(5)-C(6)-C(1)   | 111.57(17) |
| C(19)-C(6)-C(1)  | 109.56(17) |
| C(12)-C(6)-C(1)  | 106.65(17) |
| O(3)-C(7)-N(2)   | 120.25(19) |
| O(3)-C(7)-C(1)   | 118.46(18) |
| N(2)-C(7)-C(1)   | 121.25(18) |

|                     |            |
|---------------------|------------|
| N(2)-C(8)-C(9)      | 103.89(18) |
| N(2)-C(8)-H(8A)     | 111.0      |
| C(9)-C(8)-H(8A)     | 111.0      |
| N(2)-C(8)-H(8B)     | 111.0      |
| C(9)-C(8)-H(8B)     | 111.0      |
| H(8A)-C(8)-H(8B)    | 109.0      |
| C(8)-C(9)-C(10)     | 102.82(19) |
| C(8)-C(9)-H(9A)     | 111.2      |
| C(10)-C(9)-H(9A)    | 111.2      |
| C(8)-C(9)-H(9B)     | 111.2      |
| C(10)-C(9)-H(9B)    | 111.2      |
| H(9A)-C(9)-H(9B)    | 109.1      |
| C(11)-C(10)-C(9)    | 103.81(19) |
| C(11)-C(10)-H(10A)  | 111.0      |
| C(9)-C(10)-H(10A)   | 111.0      |
| C(11)-C(10)-H(10B)  | 111.0      |
| C(9)-C(10)-H(10B)   | 111.0      |
| H(10A)-C(10)-H(10B) | 109.0      |
| N(2)-C(11)-C(10)    | 103.35(18) |
| N(2)-C(11)-H(11A)   | 111.1      |
| C(10)-C(11)-H(11A)  | 111.1      |
| N(2)-C(11)-H(11B)   | 111.1      |
| C(10)-C(11)-H(11B)  | 111.1      |
| H(11A)-C(11)-H(11B) | 109.1      |
| C(13)-C(12)-C(6)    | 116.74(18) |
| C(13)-C(12)-H(12A)  | 108.1      |
| C(6)-C(12)-H(12A)   | 108.1      |
| C(13)-C(12)-H(12B)  | 108.1      |
| C(6)-C(12)-H(12B)   | 108.1      |
| H(12A)-C(12)-H(12B) | 107.3      |
| C(18)-C(13)-C(14)   | 116.8(2)   |
| C(18)-C(13)-C(12)   | 122.5(2)   |
| C(14)-C(13)-C(12)   | 120.6(2)   |
| C(15)-C(14)-C(13)   | 122.1(2)   |
| C(15)-C(14)-H(14A)  | 119.0      |
| C(13)-C(14)-H(14A)  | 119.0      |
| C(14)-C(15)-C(16)   | 119.7(2)   |
| C(14)-C(15)-H(15A)  | 120.1      |

|                     |            |
|---------------------|------------|
| C(16)-C(15)-H(15A)  | 120.1      |
| O(4)-C(16)-C(17)    | 125.1(2)   |
| O(4)-C(16)-C(15)    | 115.2(2)   |
| C(17)-C(16)-C(15)   | 119.7(2)   |
| C(16)-C(17)-C(18)   | 119.6(2)   |
| C(16)-C(17)-H(17A)  | 120.2      |
| C(18)-C(17)-H(17A)  | 120.2      |
| C(13)-C(18)-C(17)   | 122.1(2)   |
| C(13)-C(18)-H(18A)  | 119.0      |
| C(17)-C(18)-H(18A)  | 119.0      |
| C(6)-C(19)-H(19A)   | 109.5      |
| C(6)-C(19)-H(19B)   | 109.5      |
| H(19A)-C(19)-H(19B) | 109.5      |
| C(6)-C(19)-H(19C)   | 109.5      |
| H(19A)-C(19)-H(19C) | 109.5      |
| H(19B)-C(19)-H(19C) | 109.5      |
| O(4)-C(20)-H(20A)   | 109.5      |
| O(4)-C(20)-H(20B)   | 109.5      |
| H(20A)-C(20)-H(20B) | 109.5      |
| O(4)-C(20)-H(20C)   | 109.5      |
| H(20A)-C(20)-H(20C) | 109.5      |
| H(20B)-C(20)-H(20C) | 109.5      |
| O(5)-S(1)-C(21)     | 104.29(17) |
| O(5)-S(1)-C(22)     | 106.25(14) |
| C(21)-S(1)-C(22)    | 96.89(18)  |
| S(1)-C(21)-H(21A)   | 109.5      |
| S(1)-C(21)-H(21B)   | 109.5      |
| H(21A)-C(21)-H(21B) | 109.5      |
| S(1)-C(21)-H(21C)   | 109.5      |
| H(21A)-C(21)-H(21C) | 109.5      |
| H(21B)-C(21)-H(21C) | 109.5      |
| S(1)-C(22)-H(22A)   | 109.5      |
| S(1)-C(22)-H(22B)   | 109.5      |
| H(22A)-C(22)-H(22B) | 109.5      |
| S(1)-C(22)-H(22C)   | 109.5      |
| H(22A)-C(22)-H(22C) | 109.5      |
| H(22B)-C(22)-H(22C) | 109.5      |

Symmetry transformations used to generate equivalent atoms:

Table S22. Anisotropic displacement parameters ( $\text{\AA}^2 \times 10^3$ ) for *cis-1r*. The anisotropic displacement factor exponent takes the form:  $-2\pi^2 [ h^2 a^{*2} U^{11} + \dots + 2 h k a^* b^* U^{12} ]$

|       | U <sup>11</sup> | U <sup>22</sup> | U <sup>33</sup> | U <sup>23</sup> | U <sup>13</sup> | U <sup>12</sup> |
|-------|-----------------|-----------------|-----------------|-----------------|-----------------|-----------------|
| O(1)  | 38(1)           | 13(1)           | 25(1)           | -2(1)           | 0(1)            | 0(1)            |
| O(2)  | 36(1)           | 43(1)           | 29(1)           | -16(1)          | -4(1)           | -5(1)           |
| O(3)  | 41(1)           | 15(1)           | 24(1)           | -2(1)           | 1(1)            | -2(1)           |
| O(4)  | 40(1)           | 41(1)           | 32(1)           | -1(1)           | 14(1)           | -6(1)           |
| N(1)  | 32(1)           | 24(1)           | 21(1)           | -6(1)           | -3(1)           | -2(1)           |
| N(2)  | 27(1)           | 14(1)           | 22(1)           | -1(1)           | 2(1)            | 0(1)            |
| C(1)  | 26(1)           | 15(1)           | 22(1)           | -1(1)           | 0(1)            | -1(1)           |
| C(2)  | 24(1)           | 22(1)           | 30(1)           | 4(1)            | 5(1)            | 4(1)            |
| C(3)  | 21(1)           | 29(1)           | 35(1)           | 3(1)            | -2(1)           | 0(1)            |
| C(4)  | 24(1)           | 33(1)           | 28(1)           | -1(1)           | -6(1)           | -1(1)           |
| C(5)  | 24(1)           | 22(1)           | 20(1)           | 2(1)            | -2(1)           | -2(1)           |
| C(6)  | 22(1)           | 16(1)           | 21(1)           | -1(1)           | 0(1)            | 0(1)            |
| C(7)  | 22(1)           | 16(1)           | 23(1)           | 0(1)            | 1(1)            | 1(1)            |
| C(8)  | 28(1)           | 17(1)           | 24(1)           | 3(1)            | 1(1)            | 1(1)            |
| C(9)  | 46(2)           | 29(1)           | 22(1)           | 2(1)            | 0(1)            | 1(1)            |
| C(10) | 44(2)           | 29(1)           | 22(1)           | -4(1)           | 6(1)            | -1(1)           |
| C(11) | 38(1)           | 20(1)           | 25(1)           | -5(1)           | 4(1)            | 0(1)            |
| C(12) | 27(1)           | 18(1)           | 30(1)           | 3(1)            | 4(1)            | 0(1)            |
| C(13) | 25(1)           | 18(1)           | 27(1)           | 4(1)            | 1(1)            | 2(1)            |
| C(14) | 32(1)           | 28(1)           | 26(1)           | -1(1)           | 2(1)            | -4(1)           |
| C(15) | 28(1)           | 31(1)           | 32(1)           | -1(1)           | 4(1)            | -7(1)           |
| C(16) | 31(1)           | 21(1)           | 31(1)           | 5(1)            | 7(1)            | 2(1)            |
| C(17) | 36(1)           | 31(1)           | 23(1)           | 3(1)            | -1(1)           | 1(1)            |
| C(18) | 26(1)           | 31(1)           | 28(1)           | 5(1)            | -4(1)           | -2(1)           |
| C(19) | 24(1)           | 22(1)           | 27(1)           | -4(1)           | -5(1)           | 2(1)            |
| C(20) | 59(2)           | 34(1)           | 31(1)           | 0(1)            | 15(1)           | 3(1)            |
| S(1)  | 34(1)           | 35(1)           | 43(1)           | -6(1)           | -3(1)           | 5(1)            |
| O(5)  | 36(1)           | 69(2)           | 50(1)           | -24(1)          | -8(1)           | 6(1)            |
| C(21) | 65(2)           | 54(2)           | 87(3)           | 23(2)           | 17(2)           | -3(2)           |
| C(22) | 40(2)           | 38(2)           | 65(2)           | -7(1)           | 7(1)            | 3(1)            |

Table S23. Hydrogen coordinates ( $\times 10^4$ ) and isotropic displacement parameters ( $\text{\AA}^2 \times 10^3$ ) for *cis-1r*.

|        | x        | y        | z        | U(eq)   |
|--------|----------|----------|----------|---------|
| H(1O)  | 2711(18) | 8640(30) | 8129(13) | 37(9)   |
| H(2O)  | 3430(30) | 4760(40) | 5960(20) | 105(17) |
| H(2A)  | 1399     | 7471     | 8020     | 31      |
| H(2B)  | 1734     | 8181     | 7480     | 31      |
| H(3A)  | 883      | 6782     | 7124     | 34      |
| H(3B)  | 1375     | 5830     | 7464     | 34      |
| H(4A)  | 1790     | 5716     | 6505     | 34      |
| H(4B)  | 1907     | 7047     | 6458     | 34      |
| H(8A)  | 2982     | 4586     | 9022     | 27      |
| H(8B)  | 2018     | 4671     | 9085     | 27      |
| H(9A)  | 3201     | 5514     | 9885     | 39      |
| H(9B)  | 2370     | 4883     | 10045    | 39      |
| H(10A) | 1604     | 6456     | 9821     | 38      |
| H(10B) | 2376     | 7015     | 10133    | 38      |
| H(11A) | 1996     | 7620     | 9082     | 33      |
| H(11B) | 2932     | 7551     | 9265     | 33      |
| H(12A) | 2769     | 8442     | 6870     | 30      |
| H(12B) | 3411     | 8786     | 7355     | 30      |
| H(14A) | 4777     | 9076     | 7094     | 34      |
| H(15A) | 5742     | 9377     | 6379     | 37      |
| H(17A) | 4272     | 7961     | 5181     | 36      |
| H(18A) | 3302     | 7688     | 5902     | 34      |
| H(19A) | 4194     | 7077     | 7883     | 36      |
| H(19B) | 4421     | 6710     | 7233     | 36      |
| H(19C) | 3985     | 5838     | 7659     | 36      |
| H(20A) | 6041     | 8865     | 4493     | 62      |
| H(20B) | 5089     | 8967     | 4582     | 62      |
| H(20C) | 5533     | 7795     | 4700     | 62      |
| H(21A) | 4891     | 3054     | 6483     | 103     |
| H(21B) | 4533     | 4241     | 6684     | 103     |
| H(21C) | 5475     | 3991     | 6751     | 103     |
| H(22A) | 5432     | 6258     | 5678     | 72      |
| H(22B) | 5786     | 5837     | 6289     | 72      |

Table S24. Torsion angles [°] for *cis-1r*.

---

|                      |             |
|----------------------|-------------|
| O(1)-C(1)-C(2)-C(3)  | 176.45(18)  |
| C(7)-C(1)-C(2)-C(3)  | -66.0(2)    |
| C(6)-C(1)-C(2)-C(3)  | 54.6(2)     |
| C(1)-C(2)-C(3)-C(4)  | -55.0(3)    |
| C(2)-C(3)-C(4)-C(5)  | 47.8(3)     |
| O(2)-N(1)-C(5)-C(4)  | -1.3(3)     |
| O(2)-N(1)-C(5)-C(6)  | -173.41(18) |
| C(3)-C(4)-C(5)-N(1)  | 144.6(2)    |
| C(3)-C(4)-C(5)-C(6)  | -43.5(3)    |
| N(1)-C(5)-C(6)-C(19) | -21.2(3)    |
| C(4)-C(5)-C(6)-C(19) | 166.15(19)  |
| N(1)-C(5)-C(6)-C(12) | 99.3(2)     |
| C(4)-C(5)-C(6)-C(12) | -73.4(2)    |
| N(1)-C(5)-C(6)-C(1)  | -144.39(19) |
| C(4)-C(5)-C(6)-C(1)  | 43.0(3)     |
| O(1)-C(1)-C(6)-C(5)  | -169.98(17) |
| C(7)-C(1)-C(6)-C(5)  | 72.1(2)     |
| C(2)-C(1)-C(6)-C(5)  | -46.8(2)    |
| O(1)-C(1)-C(6)-C(19) | 65.4(2)     |
| C(7)-C(1)-C(6)-C(19) | -52.5(2)    |
| C(2)-C(1)-C(6)-C(19) | -171.38(17) |
| O(1)-C(1)-C(6)-C(12) | -53.4(2)    |
| C(7)-C(1)-C(6)-C(12) | -171.36(17) |
| C(2)-C(1)-C(6)-C(12) | 69.7(2)     |
| C(8)-N(2)-C(7)-O(3)  | 3.0(3)      |
| C(11)-N(2)-C(7)-O(3) | -172.8(2)   |
| C(8)-N(2)-C(7)-C(1)  | -179.43(19) |
| C(11)-N(2)-C(7)-C(1) | 4.8(4)      |
| O(1)-C(1)-C(7)-O(3)  | -157.1(2)   |
| C(2)-C(1)-C(7)-O(3)  | 83.1(2)     |
| C(6)-C(1)-C(7)-O(3)  | -38.4(3)    |
| O(1)-C(1)-C(7)-N(2)  | 25.3(3)     |
| C(2)-C(1)-C(7)-N(2)  | -94.5(2)    |

|                         |            |
|-------------------------|------------|
| C(6)-C(1)-C(7)-N(2)     | 144.0(2)   |
| C(7)-N(2)-C(8)-C(9)     | 169.2(2)   |
| C(11)-N(2)-C(8)-C(9)    | -14.2(3)   |
| N(2)-C(8)-C(9)-C(10)    | 32.7(2)    |
| C(8)-C(9)-C(10)-C(11)   | -39.5(3)   |
| C(7)-N(2)-C(11)-C(10)   | 165.9(2)   |
| C(8)-N(2)-C(11)-C(10)   | -10.2(3)   |
| C(9)-C(10)-C(11)-N(2)   | 30.5(2)    |
| C(5)-C(6)-C(12)-C(13)   | -70.3(2)   |
| C(19)-C(6)-C(12)-C(13)  | 51.5(3)    |
| C(1)-C(6)-C(12)-C(13)   | 170.21(19) |
| C(6)-C(12)-C(13)-C(18)  | 82.2(3)    |
| C(6)-C(12)-C(13)-C(14)  | -101.3(3)  |
| C(18)-C(13)-C(14)-C(15) | 0.4(4)     |
| C(12)-C(13)-C(14)-C(15) | -176.3(2)  |
| C(13)-C(14)-C(15)-C(16) | -0.4(4)    |
| C(20)-O(4)-C(16)-C(17)  | -0.2(4)    |
| C(20)-O(4)-C(16)-C(15)  | -179.4(2)  |
| C(14)-C(15)-C(16)-O(4)  | 179.2(2)   |
| C(14)-C(15)-C(16)-C(17) | 0.0(4)     |
| O(4)-C(16)-C(17)-C(18)  | -178.7(2)  |
| C(15)-C(16)-C(17)-C(18) | 0.5(4)     |
| C(14)-C(13)-C(18)-C(17) | 0.1(3)     |
| C(12)-C(13)-C(18)-C(17) | 176.7(2)   |
| C(16)-C(17)-C(18)-C(13) | -0.5(4)    |

---

Symmetry transformations used to generate equivalent atoms:

Table S25. Hydrogen bonds for *cis-1r* [Å and °].

| D-H...A             | d(D-H)  | d(H...A) | d(D...A) | <(DHA) |
|---------------------|---------|----------|----------|--------|
| O(1)-H(1O)...O(3)#1 | 0.79(3) | 1.96(3)  | 2.736(2) | 167(3) |
| O(2)-H(2O)...O(5)   | 0.91(5) | 1.87(5)  | 2.780(3) | 175(5) |

---

Symmetry transformations used to generate equivalent atoms:

#1 -x+1/2,y+1/2,z



## References

1. Yasuhiro, S.; Yoshihide, T.; Masaaki, M.; Keiji, T. Asymmetric Total Synthesis of Glycinoeclepin A: Generation of a Novel Bridgehead Anion Species. *Chem. Lett.* **2010**, *39*, 835-837.
2. Fukaya, K. et al. Synthesis of Paclitaxel. 1. Synthesis of the ABC Ring of Paclitaxel by SmI<sub>2</sub>-Mediated Cyclization. *Org. Lett.* **2015**, *17*, 2570-2573.
3. Nambu, H.; Ono, N.; Hirota, W.; Fukumoto, M.; Yakura, T. An Efficient Method for the Synthesis of 2',3'-Nonsubstituted Cycloalkane-1,3-dione-2-spirocyclopropanes Using (2-Bromoethyl)diphenylsulfonium Trifluoromethanesulfonate. *Chem. Lett.* **2016**, *64*, 1763-1768.
4. Soni, R.; Collinson, J.-M.; Clarkson, G. C.; Wills, M. An Unexpected Directing Effect in the Asymmetric Transfer Hydrogenation of  $\alpha,\alpha$ -Disubstituted Ketones. *Org. Lett.* **2011**, *13*, 4304-4307.
5. Jacques, R.; Pullin, R. D. C.; Fletcher, S. P. Desymmetrization of meso-bisphosphates using copper catalysis and alkylzirconocene nucleophiles. *Nat. Commun.* **2019**, *10*, 21.
6. Mandai, H.; Hironaka, T.; Mitsudo, K.; Suga, S. Acylative Desymmetrization of Cyclic meso-1,3-Diols by Chiral DMAP Derivatives. *Chem. Lett.* **2021**, *50*, 471-474.
7. Qin, X.-L.; Li, A.; Han, F.-S. Desymmetric Enantioselective Reduction of Cyclic 1,3-Diketones Catalyzed by a Recyclable *P*-Chiral Phosphinamide Organocatalyst. *J. Am. Chem. Soc.* **2021**, *143*, 2994-3002.
8. Synthesized according to a modified procedure where methyl acrylate was replaced with *tert*-butyl acrylate: Brooks, D. W.; Mazdiyasi, H.; Grothaus, P. G. Asymmetric microbial reduction of prochiral 2,2-disubstituted cycloalkanediones. *J. Org. Chem.* **1987**, *52*, 3223-3232.
9. Li, J.; Huang, C.; Wen, D.; Zheng, Q.; Tu, B.; Tu, T. Nickel-Catalyzed Amination of Aryl Chlorides with Amides. *Org. Lett.* **2021**, *23*, 687-691.
10. Nayar, M. S. B.; Callery, P. S. Formylation of Secondary Amines with Dialkyl Acetals of Dimethylformamide. *Anal. Lett.* **1980**, *13*, 625-634.
11. Huang, L.; Zhang, X.; Zhang, Y. CuBr-Catalyzed Reaction of *N,N*-Dimethylanilines and Silyl Enol Ethers: An Alternative Route to  $\beta$ -Arylamino Ketones. *Org. Lett.* **2009**, *11*, 3730-3733.
12. Mycka, R. J.; Eckenhoff, W. T.; Steward, O. W.; Barefoot, N. Z.; Fleming, F. F.  $\gamma$ - and  $\delta$ -Hydroxynitriles: diastereoselective electrophile-dependent alkylations. *Tetrahedron* **2013**, *69*, 366-376.
